# Supplementary material for: Fungal Biotransformation of 2′-Methylflavanone and 2′-Methylflavone as a Method to Obtain Glycosylated Derivatives
Source: MDPI journal article supplement (doi:10.3390/ijms22179617), 2021-09-05
Supplement: s1 [file s1]

## Supplementary materials

### Fungal biotransformation of 2'-methylflavanone and 2'-methylflavone as a method to obtain glycosylated derivatives

Agnieszka Krawczyk-Łebek\*, Monika Dymarska, Tomasz Janeczko and Edyta Kostrzewa-Susłow\*

Department of Chemistry, Faculty of Biotechnology and Food Science, Wrocław University of Environmental and Life Sciences, Wrocław, Poland

\*Correspondence: agnieszka.krawczyk-lebek@upwr.edu.pl, edyta.kostrzewa-suslow@upwr.edu.pl

#### Content

**Figure S1.** MS analysis of 2'-methylflavanone (**4**)

**Figure S2.** <sup>1</sup>H NMR spectrum (δ, acetone-d<sub>6</sub>, 600 MHz) of 2'-methylflavanone (**4**)

**Figure S3.** <sup>1</sup>H NMR spectrum expansion (δ, acetone-d<sub>6</sub>, 600 MHz) of 2'-methylflavanone (**4**)

**Figure S4.** <sup>1</sup>H NMR spectrum expansion (δ, acetone-d<sub>6</sub>, 600 MHz) of 2'-methylflavanone (**4**)

**Figure S5.** <sup>13</sup>C NMR spectrum (δ, acetone-d<sub>6</sub>, 151 MHz) of 2'-methylflavanone (**4**)

**Figure S6.** <sup>13</sup>C NMR spectrum expansion (δ, acetone-d<sub>6</sub>, 151 MHz) of 2'-methylflavanone (**4**)

**Figure S7.** <sup>13</sup>C NMR spectrum expansion (δ, acetone-d<sub>6</sub>, 151 MHz) of 2'-methylflavanone (**4**)

**Figure S8.** COSY contour map – <sup>1</sup>H x <sup>1</sup>H of 2'-methylflavanone (**4**)

**Figure S9.** COSY contour map – <sup>1</sup>H x <sup>1</sup>H expansion of 2'-methylflavanone (**4**)

**Figure S10.** COSY contour map – <sup>1</sup>H x <sup>1</sup>H expansion of 2'-methylflavanone (**4**)

**Figure S11.** HSQC contour map – <sup>1</sup>H x <sup>13</sup>C of 2'-methylflavanone (**4**)

**Figure S12.** HSQC contour map – <sup>1</sup>H x <sup>13</sup>C expansion of 2'-methylflavanone (**4**)

**Figure S13.** HSQC contour map – <sup>1</sup>H x <sup>13</sup>C expansion of 2'-methylflavanone (**4**)

**Figure S14.** HMBC contour map – <sup>1</sup>H x <sup>13</sup>C of 2'-methylflavanone (**4**)

**Figure S15.** HMBC contour map – <sup>1</sup>H x <sup>13</sup>C expansion of 2'-methylflavanone (**4**)

**Figure S16.** HMBC contour map – <sup>1</sup>H x <sup>13</sup>C expansion of 2'-methylflavanone (**4**)

**Figure S17.** MS analysis of 2'-methylflavanone 6-O-β-D-(4''-O-methyl)-glucopyranoside (**4a**)

**Figure S18.** <sup>1</sup>H NMR spectrum (δ, acetone-d<sub>6</sub>, 600 MHz) of 2'-methylflavanone 6-O-β-D-(4''-O-methyl)-glucopyranoside (**4a**)

**Figure S19.** <sup>1</sup>H NMR spectrum expansion (δ, acetone-d<sub>6</sub>, 600 MHz) of 2'-methylflavanone 6-O-β-D-(4''-O-methyl)-glucopyranoside (**4a**)

**Figure S20.** <sup>1</sup>H NMR spectrum expansion (δ, acetone-d<sub>6</sub>, 600 MHz) of 2'-methylflavanone 6-O-β-D-(4''-O-methyl)-glucopyranoside (**4a**)

**Figure S21.** <sup>13</sup>C NMR spectrum expansion (δ, acetone-d<sub>6</sub>, 151 MHz) of 2'-methylflavanone 6-O-β-D-(4''-O-methyl)-glucopyranoside (**4a**)

**Figure S22.** <sup>13</sup>C NMR spectrum expansion (δ, acetone-d<sub>6</sub>, 151 MHz) of 2'-methylflavanone 6-O-β-D-(4''-O-methyl)-glucopyranoside (**4a**)

**Figure S23.** <sup>13</sup>C NMR spectrum expansion (δ, acetone-d<sub>6</sub>, 151 MHz) of 2'-methylflavanone 6-O-β-D-(4''-O-methyl)-glucopyranoside (**4a**)

**Figure S24.** COSY contour map –  $^1\text{H} \times ^1\text{H}$  of 2'-methylflavanone 6-O- $\beta$ -D-(4''-O-methyl)-glucopyranoside (**4a**)

**Figure S25.** COSY contour map –  $^1\text{H} \times ^1\text{H}$  expansion of 2'-methylflavanone 6-O- $\beta$ -D-(4''-O-methyl)-glucopyranoside (**4a**)

**Figure S26.** COSY contour map –  $^1\text{H} \times ^1\text{H}$  expansion of 2'-methylflavanone 6-O- $\beta$ -D-(4''-O-methyl)-glucopyranoside (**4a**)

**Figure S27.** HSQC contour map –  $^1\text{H} \times ^{13}\text{C}$  of 2'-methylflavanone 6-O- $\beta$ -D-(4''-O-methyl)-glucopyranoside (**4a**)

**Figure S28.** HSQC contour map –  $^1\text{H} \times ^{13}\text{C}$  expansion of 2'-methylflavanone 6-O- $\beta$ -D-(4''-O-methyl)-glucopyranoside (**4a**)

**Figure S29.** HSQC contour map –  $^1\text{H} \times ^{13}\text{C}$  expansion of 2'-methylflavanone 6-O- $\beta$ -D-(4''-O-methyl)-glucopyranoside (**4a**)

**Figure S30.** HSQC contour map –  $^1\text{H} \times ^{13}\text{C}$  expansion of 2'-methylflavanone 6-O- $\beta$ -D-(4''-O-methyl)-glucopyranoside (**4a**)

**Figure S31.** HMBC contour map –  $^1\text{H} \times ^{13}\text{C}$  of 2'-methylflavanone 6-O- $\beta$ -D-(4''-O-methyl)-glucopyranoside (**4a**)

**Figure S32.** HMBC contour map –  $^1\text{H} \times ^{13}\text{C}$  expansion of 2'-methylflavanone 6-O- $\beta$ -D-(4''-O-methyl)-glucopyranoside (**4a**)

**Figure S33.** HMBC contour map –  $^1\text{H} \times ^{13}\text{C}$  expansion of 2'-methylflavanone 6-O- $\beta$ -D-(4''-O-methyl)-glucopyranoside (**4a**)

**Figure S34.** HMBC contour map –  $^1\text{H} \times ^{13}\text{C}$  expansion of 2'-methylflavanone 6-O- $\beta$ -D-(4''-O-methyl)-glucopyranoside (**4a**)

**Figure S35.** HMBC contour map –  $^1\text{H} \times ^{13}\text{C}$  expansion of 2'-methylflavanone 6-O- $\beta$ -D-(4''-O-methyl)-glucopyranoside (**4a**)

**Figure S36.** HMBC contour map –  $^1\text{H} \times ^{13}\text{C}$  expansion of 2'-methylflavanone 6-O- $\beta$ -D-(4''-O-methyl)-glucopyranoside (**4a**)

**Figure S37.** MS analysis of 3'-hydroxy-2'-methylflavanone 6-O- $\beta$ -D-(4''-O-methyl)-glucopyranoside (**4b**)

**Figure S38.**  $^1\text{H}$  NMR spectrum ( $\delta$ , acetone- $d_6$ , 600 MHz) of 3'-hydroxy-2'-methylflavanone 6-O- $\beta$ -D-(4''-O-methyl)-glucopyranoside (**4b**)

**Figure S39.**  $^1\text{H}$  NMR spectrum expansion ( $\delta$ , acetone- $d_6$ , 600 MHz) of 3'-hydroxy-2'-methylflavanone 6-O- $\beta$ -D-(4''-O-methyl)-glucopyranoside (**4b**)

**Figure S40.**  $^1\text{H}$  NMR spectrum expansion ( $\delta$ , acetone- $d_6$ , 600 MHz) of 3'-hydroxy-2'-methylflavanone 6-O- $\beta$ -D-(4''-O-methyl)-glucopyranoside (**4b**)

**Figure S41.**  $^{13}\text{C}$  NMR spectrum ( $\delta$ , acetone- $d_6$ , 151 MHz) of 3'-hydroxy-2'-methylflavanone 6-O- $\beta$ -D-(4''-O-methyl)-glucopyranoside (**4b**)

**Figure S42.**  $^{13}\text{C}$  NMR spectrum expansion ( $\delta$ , acetone- $d_6$ , 151 MHz) of 3'-hydroxy-2'-methylflavanone 6-O- $\beta$ -D-(4''-O-methyl)-glucopyranoside (**4b**)

**Figure S43.**  $^{13}\text{C}$  NMR spectrum expansion ( $\delta$ , acetone- $d_6$ , 151 MHz) of 3'-hydroxy-2'-methylflavanone 6-O- $\beta$ -D-(4''-O-methyl)-glucopyranoside (**4b**)



**Figure S44.** COSY contour map –  $^1\text{H} \times ^1\text{H}$  of 3'-hydroxy-2'-methylflavanone 6-O- $\beta$ -D-(4''-O-methyl)-glucopyranoside (**4b**)

**Figure S45.** COSY contour map –  $^1\text{H} \times ^1\text{H}$  expansion of 3'-hydroxy-2'-methylflavanone 6-O- $\beta$ -D-(4''-O-methyl)-glucopyranoside (**4b**)

**Figure S46.** COSY contour map –  $^1\text{H} \times ^1\text{H}$  expansion of 3'-hydroxy-2'-methylflavanone 6-O- $\beta$ -D-(4''-O-methyl)-glucopyranoside (**4b**)

**Figure S47.** HSQC contour map –  $^1\text{H} \times ^{13}\text{C}$  of 3'-hydroxy-2'-methylflavanone 6-O- $\beta$ -D-(4''-O-methyl)-glucopyranoside (**4b**)

**Figure S48.** HSQC contour map –  $^1\text{H} \times ^{13}\text{C}$  expansion of 3'-hydroxy-2'-methylflavanone 6-O- $\beta$ -D-(4''-O-methyl)-glucopyranoside (**4b**)

**Figure S49.** HSQC contour map –  $^1\text{H} \times ^{13}\text{C}$  expansion of 3'-hydroxy-2'-methylflavanone 6-O- $\beta$ -D-(4''-O-methyl)-glucopyranoside (**4b**)

**Figure S50.** HMBC contour map –  $^1\text{H} \times ^{13}\text{C}$  3'-hydroxy-2'-methylflavanone 6-O- $\beta$ -D-(4''-O-methyl)-glucopyranoside (**4b**)

**Figure S51.** HMBC contour map –  $^1\text{H} \times ^{13}\text{C}$  expansion of 3'-hydroxy-2'-methylflavanone 6-O- $\beta$ -D-(4''-O-methyl)-glucopyranoside (**4b**)

**Figure S52.** HMBC contour map –  $^1\text{H} \times ^{13}\text{C}$  expansion of 3'-hydroxy-2'-methylflavanone 6-O- $\beta$ -D-(4''-O-methyl)-glucopyranoside (**4b**)

**Figure S53.** MS analysis of 2-(2'-methylphenyl)-chromane 4-O- $\beta$ -D-(4''-O-methyl)-glucopyranoside (**4c**)

**Figure S54.**  $^1\text{H}$  NMR spectrum ( $\delta$ , acetone- $d_6$ , 600 MHz) of 2-(2'-methylphenyl)-chromane 4-O- $\beta$ -D-(4''-O-methyl)-glucopyranoside (**4c**)

**Figure S55.**  $^1\text{H}$  NMR spectrum expansion ( $\delta$ , acetone- $d_6$ , 600 MHz) of 2-(2'-methylphenyl)-chromane 4-O- $\beta$ -D-(4''-O-methyl)-glucopyranoside (**4c**)

**Figure S56.**  $^1\text{H}$  NMR spectrum expansion ( $\delta$ , acetone- $d_6$ , 600 MHz) of 2-(2'-methylphenyl)-chromane 4-O- $\beta$ -D-(4''-O-methyl)-glucopyranoside (**4c**)

**Figure S57.**  $^{13}\text{C}$  NMR spectrum ( $\delta$ , acetone- $d_6$ , 151 MHz) of 2-(2'-methylphenyl)-chromane 4-O- $\beta$ -D-(4''-O-methyl)-glucopyranoside (**4c**)

**Figure S58.**  $^{13}\text{C}$  NMR spectrum expansion ( $\delta$ , acetone- $d_6$ , 151 MHz) of 2-(2'-methylphenyl)-chromane 4-O- $\beta$ -D-(4''-O-methyl)-glucopyranoside (**4c**)

**Figure S59.**  $^{13}\text{C}$  NMR spectrum expansion ( $\delta$ , acetone- $d_6$ , 151 MHz) of 2-(2'-methylphenyl)-chromane 4-O- $\beta$ -D-(4''-O-methyl)-glucopyranoside (**4c**)

**Figure S60.** COSY contour map –  $^1\text{H} \times ^1\text{H}$  of 2-(2'-methylphenyl)-chromane 4-O- $\beta$ -D-(4''-O-methyl)-glucopyranoside (**4c**)

**Figure S61.** COSY contour map –  $^1\text{H} \times ^1\text{H}$  expansion of of 2-(2'-methylphenyl)-chromane 4-O- $\beta$ -D-(4''-O-methyl)-glucopyranoside (**4c**)

**Figure S62.** COSY contour map –  $^1\text{H} \times ^1\text{H}$  expansion of of 2-(2'-methylphenyl)-chromane 4-O- $\beta$ -D-(4''-O-methyl)-glucopyranoside (**4c**)

**Figure S63.** HSQC contour map –  $^1\text{H} \times ^{13}\text{C}$  of 2-(2'-methylphenyl)-chromane 4-O- $\beta$ -D-(4''-O-methyl)-glucopyranoside (**4c**)

**Figure S64.** HSQC contour map –  $^1\text{H} \times ^{13}\text{C}$  expansion of 2-(2'-methylphenyl)-chromane 4-O- $\beta$ -D-(4''-O-methyl)-glucopyranoside (**4c**)

**Figure S65.** HSQC contour map –  $^1\text{H} \times ^{13}\text{C}$  expansion of 2-(2'-methylphenyl)-chromane 4-O- $\beta$ -D-(4''-O-methyl)-glucopyranoside (**4c**)

**Figure S66.** HMBC contour map –  $^1\text{H} \times ^{13}\text{C}$  of 2-(2'-methylphenyl)-chromane 4-O- $\beta$ -D-(4''-O-methyl)-glucopyranoside (**4c**)

**Figure S67.** HMBC contour map –  $^1\text{H} \times ^{13}\text{C}$  expansion of 2-(2'-methylphenyl)-chromane 4-O- $\beta$ -D-(4''-O-methyl)-glucopyranoside (**4c**)

**Figure S68.** HMBC contour map –  $^1\text{H} \times ^{13}\text{C}$  expansion of 2-(2'-methylphenyl)-chromane 4-O- $\beta$ -D-(4''-O-methyl)-glucopyranoside (**4c**)

**Figure S69.** HMBC contour map –  $^1\text{H} \times ^{13}\text{C}$  expansion of 2-(2'-methylphenyl)-chromane 4-O- $\beta$ -D-(4''-O-methyl)-glucopyranoside (**4c**)

**Figure S70.** HMBC contour map –  $^1\text{H} \times ^{13}\text{C}$  expansion of 2-(2'-methylphenyl)-chromane 4-O- $\beta$ -D-(4''-O-methyl)-glucopyranoside (**4c**)

**Figure S71.** MS analysis of 2'-methylflavanone 3'-O- $\beta$ -D-(4''-O-methyl)-glucopyranoside (**4d**)

**Figure S72.**  $^1\text{H}$  NMR spectrum ( $\delta$ , acetone- $d_6$ , 600 MHz) of 2'-methylflavanone 3'-O- $\beta$ -D-(4''-O-methyl)-glucopyranoside (**4d**)

**Figure S73.**  $^1\text{H}$  NMR spectrum expansion ( $\delta$ , acetone- $d_6$ , 600 MHz) of 2'-methylflavanone 3'-O- $\beta$ -D-(4''-O-methyl)-glucopyranoside (**4d**)

**Figure S74.**  $^1\text{H}$  NMR spectrum expansion ( $\delta$ , acetone- $d_6$ , 600 MHz) of 2'-methylflavanone 3'-O- $\beta$ -D-(4''-O-methyl)-glucopyranoside (**4d**)

**Figure S75.**  $^{13}\text{C}$  NMR spectrum ( $\delta$ , acetone- $d_6$ , 151 MHz) of 2'-methylflavanone 3'-O- $\beta$ -D-(4''-O-methyl)-glucopyranoside (**4d**)

**Figure S76.**  $^{13}\text{C}$  NMR spectrum expansion ( $\delta$ , acetone- $d_6$ , 151 MHz) of 2'-methylflavanone 3'-O- $\beta$ -D-(4''-O-methyl)-glucopyranoside (**4d**)

**Figure S77.**  $^{13}\text{C}$  NMR spectrum expansion ( $\delta$ , acetone- $d_6$ , 151 MHz) of 2'-methylflavanone 3'-O- $\beta$ -D-(4''-O-methyl)-glucopyranoside (**4d**)

**Figure S78.** COSY contour map –  $^1\text{H} \times ^1\text{H}$  of 2'-methylflavanone 3'-O- $\beta$ -D-(4''-O-methyl)-glucopyranoside (**4d**)

**Figure S79.** COSY contour map –  $^1\text{H} \times ^1\text{H}$  expansion of 2'-methylflavanone 3'-O- $\beta$ -D-(4''-O-methyl)-glucopyranoside (**4d**)

**Figure S80.** COSY contour map –  $^1\text{H} \times ^1\text{H}$  expansion of 2'-methylflavanone 3'-O- $\beta$ -D-(4''-O-methyl)-glucopyranoside (**4d**)

**Figure S81.** HSQC contour map –  $^1\text{H} \times ^{13}\text{C}$  of 2'-methylflavanone 3'-O- $\beta$ -D-(4''-O-methyl)-glucopyranoside (**4d**)

**Figure S82.** HSQC contour map –  $^1\text{H} \times ^{13}\text{C}$  expansion of 2'-methylflavanone 3'-O- $\beta$ -D-(4''-O-methyl)-glucopyranoside (**4d**)

**Figure S83.** HSQC contour map –  $^1\text{H} \times ^{13}\text{C}$  expansion of 2'-methylflavanone 3'-O- $\beta$ -D-(4''-O-methyl)-glucopyranoside (**4d**)

**Figure S84.** HSQC contour map –  $^1\text{H} \times ^{13}\text{C}$  expansion of 2'-methylflavanone 3'-O- $\beta$ -D-(4''-O-methyl)-glucopyranoside (**4d**)

**Figure S85.** HMBC contour map –  $^1\text{H} \times ^{13}\text{C}$  of 2'-methylflavanone 3'-O- $\beta$ -D-(4''-O-methyl)-glucopyranoside (**4d**)

**Figure S86.** HMBC contour map –  $^1\text{H} \times ^{13}\text{C}$  expansion of 2'-methylflavanone 3'-O- $\beta$ -D-(4''-O-methyl)-glucopyranoside (**4d**)

**Figure S87.** HMBC contour map –  $^1\text{H} \times ^{13}\text{C}$  expansion of 2'-methylflavanone 3'-O- $\beta$ -D-(4''-O-methyl)-glucopyranoside (**4d**)

**Figure S88.** HMBC contour map –  $^1\text{H} \times ^{13}\text{C}$  expansion of 2'-methylflavanone 3'-O- $\beta$ -D-(4''-O-methyl)-glucopyranoside (**4d**)

**Figure S89.** MS analysis of 2-methylbenzoic acid 4-O- $\beta$ -D-(4'-O-methyl)-glucopyranoside (**4e**)

**Figure S90.**  $^1\text{H}$  NMR spectrum ( $\delta$ , acetone- $d_6$ , 600 MHz) of 2-methylbenzoic acid 4-O- $\beta$ -D-(4'-O-methyl)-glucopyranoside (**4e**)

**Figure S91.**  $^1\text{H}$  NMR spectrum expansion ( $\delta$ , acetone- $d_6$ , 600 MHz) of 2-methylbenzoic acid 4-O- $\beta$ -D-(4'-O-methyl)-glucopyranoside (**4e**)

**Figure S92.**  $^1\text{H}$  NMR spectrum expansion ( $\delta$ , acetone- $d_6$ , 600 MHz) of 2-methylbenzoic acid 4-O- $\beta$ -D-(4'-O-methyl)-glucopyranoside (**4e**)

**Figure S93.**  $^{13}\text{C}$  NMR spectrum ( $\delta$ , acetone- $d_6$ , 151 MHz) of 2-methylbenzoic acid 4-O- $\beta$ -D-(4'-O-methyl)-glucopyranoside (**4e**)

**Figure S94.**  $^{13}\text{C}$  NMR spectrum expansion ( $\delta$ , acetone- $d_6$ , 151 MHz) of 2-methylbenzoic acid 4-O- $\beta$ -D-(4'-O-methyl)-glucopyranoside (**4e**)

**Figure S95.**  $^{13}\text{C}$  NMR spectrum expansion ( $\delta$ , acetone- $d_6$ , 151 MHz) of 2-methylbenzoic acid 4-O- $\beta$ -D-(4'-O-methyl)-glucopyranoside (**4e**)

**Figure S96.** COSY contour map –  $^1\text{H} \times ^1\text{H}$  of 2-methylbenzoic acid 4-O- $\beta$ -D-(4'-O-methyl)-glucopyranoside (**4e**)

**Figure S97.** COSY contour map –  $^1\text{H} \times ^1\text{H}$  expansion of 2-methylbenzoic acid 4-O- $\beta$ -D-(4'-O-methyl)-glucopyranoside (**4e**)

**Figure S98.** COSY contour map –  $^1\text{H} \times ^1\text{H}$  expansion of 2-methylbenzoic acid 4-O- $\beta$ -D-(4'-O-methyl)-glucopyranoside (**4e**)

**Figure S99.** HSQC contour map –  $^1\text{H} \times ^{13}\text{C}$  2-methylbenzoic acid 4-O- $\beta$ -D-(4'-O-methyl)-glucopyranoside (**4e**)

**Figure S100.** HSQC contour map –  $^1\text{H} \times ^{13}\text{C}$  expansion of 2-methylbenzoic acid 4-O- $\beta$ -D-(4'-O-methyl)-glucopyranoside (**4e**)

**Figure S101.** HSQC contour map –  $^1\text{H} \times ^{13}\text{C}$  expansion of 2-methylbenzoic acid 4-O- $\beta$ -D-(4'-O-methyl)-glucopyranoside (**4e**)

**Figure S102.** HMBC contour map –  $^1\text{H} \times ^{13}\text{C}$  of 2-methylbenzoic acid 4-O- $\beta$ -D-(4'-O-methyl)-glucopyranoside (**4e**)

**Figure S103.** HMBC contour map –  $^1\text{H} \times ^{13}\text{C}$  expansion of 2-methylbenzoic acid 4-O- $\beta$ -D-(4'-O-methyl)-glucopyranoside (**4e**)

**Figure S104.** HMBC contour map –  $^1\text{H} \times ^{13}\text{C}$  expansion of 2-methylbenzoic acid 4-O- $\beta$ -D-(4'-O-methyl)-glucopyranoside (**4e**)

**Figure S105.** MS analysis of 2'-methylflavone (**5**)

**Figure S106.**  $^1\text{H}$  NMR spectrum ( $\delta$ , acetone- $d_6$ , 600 MHz) of 2'-methylflavone (**5**)

**Figure S107.**  $^1\text{H}$  NMR spectrum expansion ( $\delta$ , acetone- $d_6$ , 600 MHz) 2'-methylflavone (**5**)

**Figure S108.**  $^{13}\text{C}$  NMR spectrum ( $\delta$ , acetone- $d_6$ , 151 MHz) of 2'-methylflavone (**5**)

**Figure S109.**  $^{13}\text{C}$  NMR spectrum expansion ( $\delta$ , acetone- $d_6$ , 151 MHz) of 2'-methylflavone (**5**)

**Figure S110.** COSY contour map –  $^1\text{H} \times ^1\text{H}$  of 2'-methylflavone (**5**)

**Figure S111.** COSY contour map –  $^1\text{H} \times ^1\text{H}$  expansion of 2'-methylflavone (**5**)

**Figure S112.** COSY contour map –  $^1\text{H} \times ^1\text{H}$  expansion of 2'-methylflavone (**5**)

**Figure S113.** HSQC contour map –  $^1\text{H} \times ^{13}\text{C}$  of 2'-methylflavone (**5**)

**Figure S114.** HSQC contour map –  $^1\text{H} \times ^{13}\text{C}$  expansion of 2'-methylflavone (**5**)

**Figure S115.** HSQC contour map –  $^1\text{H} \times ^{13}\text{C}$  expansion of 2'-methylflavone (**5**)

**Figure S116.** HMBC contour map –  $^1\text{H} \times ^{13}\text{C}$  of 2'-methylflavone (**5**)

**Figure S117.** HMBC contour map –  $^1\text{H} \times ^{13}\text{C}$  expansion of 2'-methylflavone (**5**)

**Figure S118.** HMBC contour map –  $^1\text{H} \times ^{13}\text{C}$  expansion of 2'-methylflavone (**5**)

**Figure S119.** MS analysis of 2'-methylflavone 3'- $O$ - $\beta$ -D-(4''- $O$ -methyl)-glucopyranoside (**5a**)

**Figure S120.**  $^1\text{H}$  NMR spectrum ( $\delta$ , acetone- $d_6$ , 600 MHz) of 2'-methylflavone 3'- $O$ - $\beta$ -D-(4''- $O$ -methyl)-glucopyranoside (**5a**)

**Figure S121.**  $^1\text{H}$  NMR spectrum expansion ( $\delta$ , acetone- $d_6$ , 600 MHz) of 2'-methylflavone 3'- $O$ - $\beta$ -D-(4''- $O$ -methyl)-glucopyranoside (**5a**)

**Figure S122.**  $^1\text{H}$  NMR spectrum expansion ( $\delta$ , acetone- $d_6$ , 600 MHz) of 2'-methylflavone 3'- $O$ - $\beta$ -D-(4''- $O$ -methyl)-glucopyranoside (**5a**)

**Figure S123.**  $^{13}\text{C}$  NMR spectrum ( $\delta$ , acetone- $d_6$ , 151 MHz) of 2'-methylflavone 3'- $O$ - $\beta$ -D-(4''- $O$ -methyl)-glucopyranoside (**5a**)

**Figure S124.**  $^{13}\text{C}$  NMR spectrum expansion ( $\delta$ , acetone- $d_6$ , 151 MHz) of 2'-methylflavone 3'- $O$ - $\beta$ -D-(4''- $O$ -methyl)-glucopyranoside (**5a**)

**Figure S125.**  $^{13}\text{C}$  NMR spectrum expansion ( $\delta$ , acetone- $d_6$ , 151 MHz) of 2'-methylflavone 3'- $O$ - $\beta$ -D-(4''- $O$ -methyl)-glucopyranoside (**5a**)

**Figure S126.** COSY contour map –  $^1\text{H} \times ^1\text{H}$  of 2'-methylflavone 3'- $O$ - $\beta$ -D-(4''- $O$ -methyl)-glucopyranoside (**5a**)

**Figure S127.** COSY contour map –  $^1\text{H} \times ^1\text{H}$  expansion of 2'-methylflavone 3'- $O$ - $\beta$ -D-(4''- $O$ -methyl)-glucopyranoside (**5a**)

**Figure S128.** COSY contour map –  $^1\text{H} \times ^1\text{H}$  expansion of 2'-methylflavone 3'- $O$ - $\beta$ -D-(4''- $O$ -methyl)-glucopyranoside (**5a**)

**Figure S129.** HSQC contour map –  $^1\text{H} \times ^{13}\text{C}$  of 2'-methylflavone 3'- $O$ - $\beta$ -D-(4''- $O$ -methyl)-glucopyranoside (**5a**)

**Figure S130.** HSQC contour map –  $^1\text{H} \times ^{13}\text{C}$  expansion of 2'-methylflavone 3'- $O$ - $\beta$ -D-(4''- $O$ -methyl)-glucopyranoside (**5a**)

**Figure S131.** HSQC contour map –  $^1\text{H} \times ^{13}\text{C}$  expansion of 2'-methylflavone 3'- $O$ - $\beta$ -D-(4''- $O$ -methyl)-glucopyranoside (**5a**)

**Figure S132.** HMBC contour map –  $^1\text{H} \times ^{13}\text{C}$  expansion of 2'-methylflavone 3'- $O$ - $\beta$ -D-(4''- $O$ -methyl)-glucopyranoside (**5a**)

**Figure S133.** HMBC contour map –  $^1\text{H} \times ^{13}\text{C}$  expansion of 2'-methylflavone 3'-O- $\beta$ -D-(4''-O-methyl)-glucopyranoside (**5a**)

**Figure S134.** HMBC contour map –  $^1\text{H} \times ^{13}\text{C}$  expansion of 2'-methylflavone 3'-O- $\beta$ -D-(4''-O-methyl)-glucopyranoside (**5a**)

**Figure S135.** MS analysis of 2'-methylflavone 4'-O- $\beta$ -D-(4''-O-methyl)-glucopyranoside (**5b**)

**Figure S136.**  $^1\text{H}$  NMR spectrum ( $\delta$ , acetone- $d_6$ , 600 MHz) of 2'-methylflavone 4'-O- $\beta$ -D-(4''-O-methyl)-glucopyranoside (**5b**)

**Figure S137.**  $^1\text{H}$  NMR spectrum expansion ( $\delta$ , acetone- $d_6$ , 600 MHz) of 2'-methylflavone 4'-O- $\beta$ -D-(4''-O-methyl)-glucopyranoside (**5b**)

**Figure S138.**  $^1\text{H}$  NMR spectrum expansion ( $\delta$ , acetone- $d_6$ , 600 MHz) of 2'-methylflavone 4'-O- $\beta$ -D-(4''-O-methyl)-glucopyranoside (**5b**)

**Figure S139.**  $^{13}\text{C}$  NMR spectrum of ( $\delta$ , acetone- $d_6$ , 151 MHz) 2'-methylflavone 4'-O- $\beta$ -D-(4''-O-methyl)-glucopyranoside (**5b**)

**Figure S140.**  $^{13}\text{C}$  NMR spectrum expansion ( $\delta$ , acetone- $d_6$ , 151 MHz) of 2'-methylflavone 4'-O- $\beta$ -D-(4''-O-methyl)-glucopyranoside (**5b**)

**Figure S141.**  $^{13}\text{C}$  NMR spectrum expansion ( $\delta$ , acetone- $d_6$ , 151 MHz) of 2'-methylflavone 4'-O- $\beta$ -D-(4''-O-methyl)-glucopyranoside (**5b**)

**Figure S142.** COSY contour map –  $^1\text{H} \times ^1\text{H}$  2'-methylflavone 4'-O- $\beta$ -D-(4''-O-methyl)-glucopyranoside (**5b**)

**Figure S143.** COSY contour map –  $^1\text{H} \times ^1\text{H}$  expansion of 2'-methylflavone 4'-O- $\beta$ -D-(4''-O-methyl)-glucopyranoside (**5b**)

**Figure S144.** COSY contour map –  $^1\text{H} \times ^1\text{H}$  expansion of 2'-methylflavone 4'-O- $\beta$ -D-(4''-O-methyl)-glucopyranoside (**5b**)

**Figure S145.** HSQC contour map –  $^1\text{H} \times ^{13}\text{C}$  of 2'-methylflavone 4'-O- $\beta$ -D-(4''-O-methyl)-glucopyranoside (**5b**)

**Figure S146.** HSQC contour map –  $^1\text{H} \times ^{13}\text{C}$  expansion of 2'-methylflavone 4'-O- $\beta$ -D-(4''-O-methyl)-glucopyranoside (**5b**)

**Figure S147.** HSQC contour map –  $^1\text{H} \times ^{13}\text{C}$  expansion of 2'-methylflavone 4'-O- $\beta$ -D-(4''-O-methyl)-glucopyranoside (**5b**)

**Figure S148.** HMBC contour map –  $^1\text{H} \times ^{13}\text{C}$  of 2'-methylflavone 4'-O- $\beta$ -D-(4''-O-methyl)-glucopyranoside (**5b**)

**Figure S149.** HMBC contour map –  $^1\text{H} \times ^{13}\text{C}$  expansion of 2'-methylflavone 4'-O- $\beta$ -D-(4''-O-methyl)-glucopyranoside (**5b**)

**Figure S150.** HMBC contour map –  $^1\text{H} \times ^{13}\text{C}$  expansion of 2'-methylflavone 4'-O- $\beta$ -D-(4''-O-methyl)-glucopyranoside (**5b**)

**Figure S151.** HMBC contour map –  $^1\text{H} \times ^{13}\text{C}$  expansion of 2'-methylflavone 4'-O- $\beta$ -D-(4''-O-methyl)-glucopyranoside (**5b**)

**Figure S152.** MS analysis of 2'-methylflavone 5'-O- $\beta$ -D-(4''-O-methyl)-glucopyranoside (**5c**)

**Figure S153.**  $^1\text{H}$  NMR spectrum ( $\delta$ , acetone- $d_6$ , 600 MHz) of 2'-methylflavone 5'-O- $\beta$ -D-(4''-O-methyl)-glucopyranoside (**5c**)

**Figure S154.**  $^1\text{H}$  NMR spectrum expansion ( $\delta$ , acetone- $d_6$ , 600 MHz) of 2'-methylflavone 5'-O- $\beta$ -D-(4''-O-methyl)-glucopyranoside (**5c**)

**Figure S155.**  $^1\text{H}$  NMR spectrum expansion ( $\delta$ , acetone- $d_6$ , 600 MHz) of 2'-methylflavone 5'-O- $\beta$ -D-(4''-O-methyl)-glucopyranoside (**5c**)

**Figure S156.**  $^{13}\text{C}$  NMR spectrum ( $\delta$ , acetone- $d_6$ , 151 MHz) of 2'-methylflavone 5'-O- $\beta$ -D-(4''-O-methyl)-glucopyranoside (**5c**)

**Figure S157.**  $^{13}\text{C}$  NMR spectrum expansion ( $\delta$ , acetone- $d_6$ , 151 MHz) of 2'-methylflavone 5'-O- $\beta$ -D-(4''-O-methyl)-glucopyranoside (**5c**)

**Figure S158.**  $^{13}\text{C}$  NMR spectrum expansion ( $\delta$ , acetone- $d_6$ , 151 MHz) of 2'-methylflavone 5'-O- $\beta$ -D-(4''-O-methyl)-glucopyranoside (**5c**)

**Figure S159.** COSY contour map –  $^1\text{H} \times ^1\text{H}$  of 2'-methylflavone 5'-O- $\beta$ -D-(4''-O-methyl)-glucopyranoside (**5c**)

**Figure S160.** COSY contour map –  $^1\text{H} \times ^1\text{H}$  expansion of 2'-methylflavone 5'-O- $\beta$ -D-(4''-O-methyl)-glucopyranoside (**5c**)

**Figure S161.** COSY contour map –  $^1\text{H} \times ^1\text{H}$  expansion of 2'-methylflavone 5'-O- $\beta$ -D-(4''-O-methyl)-glucopyranoside (**5c**)

**Figure S162.** HSQC contour map –  $^1\text{H} \times ^{13}\text{C}$  of 2'-methylflavone 5'-O- $\beta$ -D-(4''-O-methyl)-glucopyranoside (**5c**)

**Figure S163.** HSQC contour map –  $^1\text{H} \times ^{13}\text{C}$  expansion of 2'-methylflavone 5'-O- $\beta$ -D-(4''-O-methyl)-glucopyranoside (**5c**)

**Figure S164.** HSQC contour map –  $^1\text{H} \times ^{13}\text{C}$  expansion of 2'-methylflavone 5'-O- $\beta$ -D-(4''-O-methyl)-glucopyranoside (**5c**)

**Figure S165.** HMBC contour map –  $^1\text{H} \times ^{13}\text{C}$  of 2'-methylflavone 5'-O- $\beta$ -D-(4''-O-methyl)-glucopyranoside (**5c**)

**Figure S166.** HMBC contour map –  $^1\text{H} \times ^{13}\text{C}$  expansion of 2'-methylflavone 5'-O- $\beta$ -D-(4''-O-methyl)-glucopyranoside (**5c**)

**Figure S167.** HMBC contour map –  $^1\text{H} \times ^{13}\text{C}$  expansion of 2'-methylflavone 5'-O- $\beta$ -D-(4''-O-methyl)-glucopyranoside (**5c**)

Molecular formula: C<sub>16</sub>H<sub>14</sub>O<sub>2</sub>

Formula weight: 238.10

Ionization mode: positive

Precursor: [M + H]<sup>+</sup> 239.30

239.3000>121.1000 CE (Collision Energy): -22.0

239.3000>224.1000 CE: -17.0

239.3000>198.1500 CE: -8.0

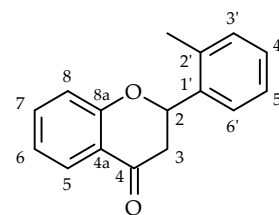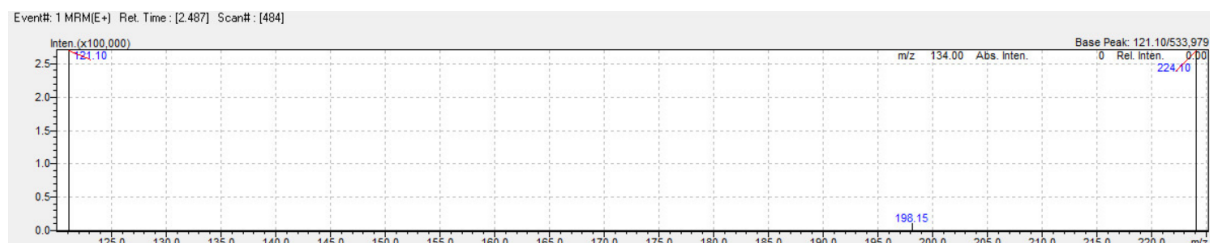

Figure S1. MS analysis of 2'-methyflavanone (4)

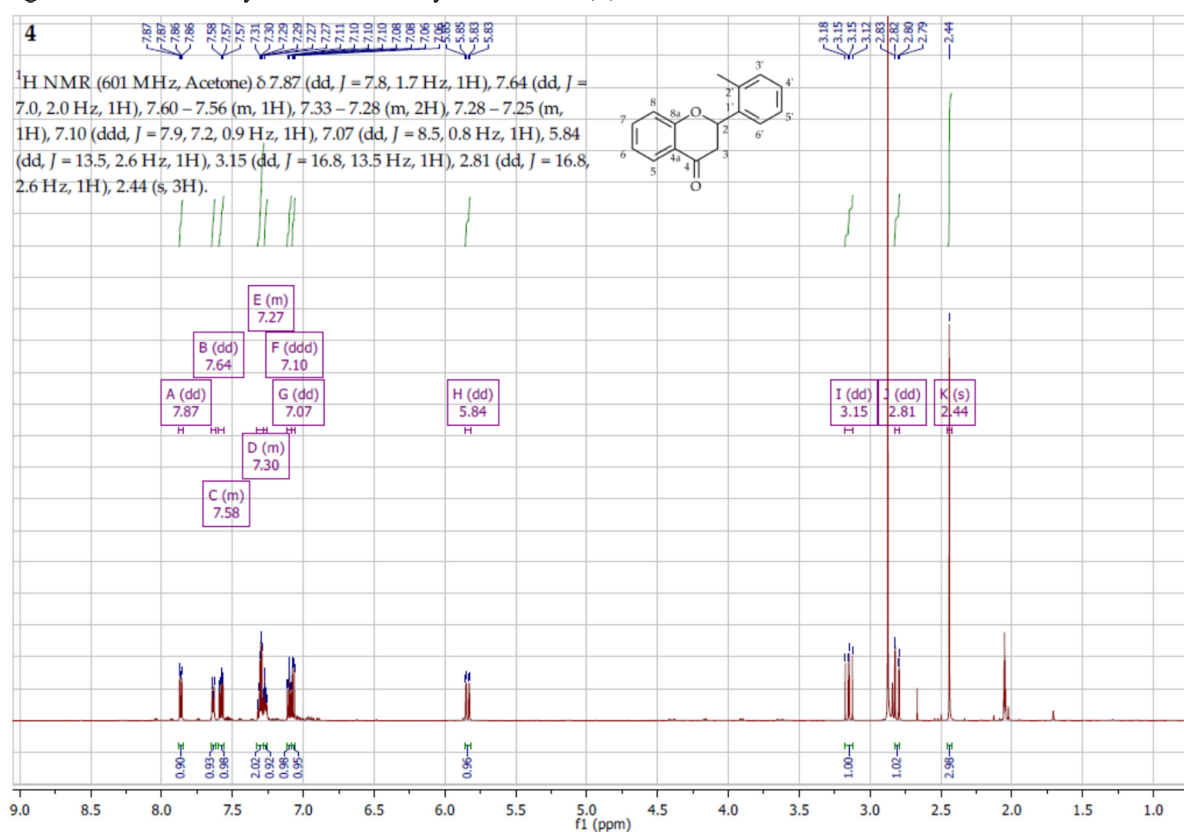

Figure S2. <sup>1</sup>H NMR spectrum (δ, acetone-d<sub>6</sub>, 600 MHz) of 2'-methyflavanone (4)

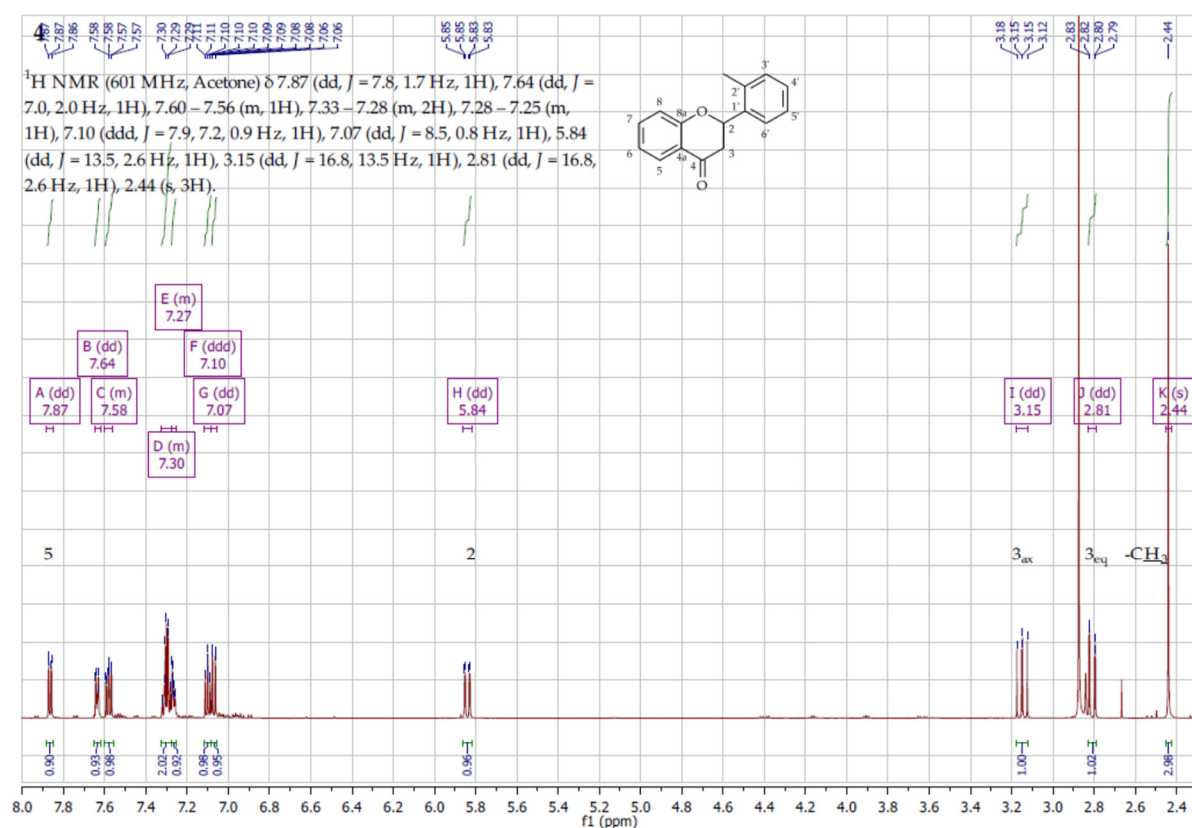

**Figure S3**  $^1\text{H}$  NMR spectrum expansion ( $\delta$ , acetone- $d_6$ , 600 MHz) of 2'-methyflavanone (**4**)

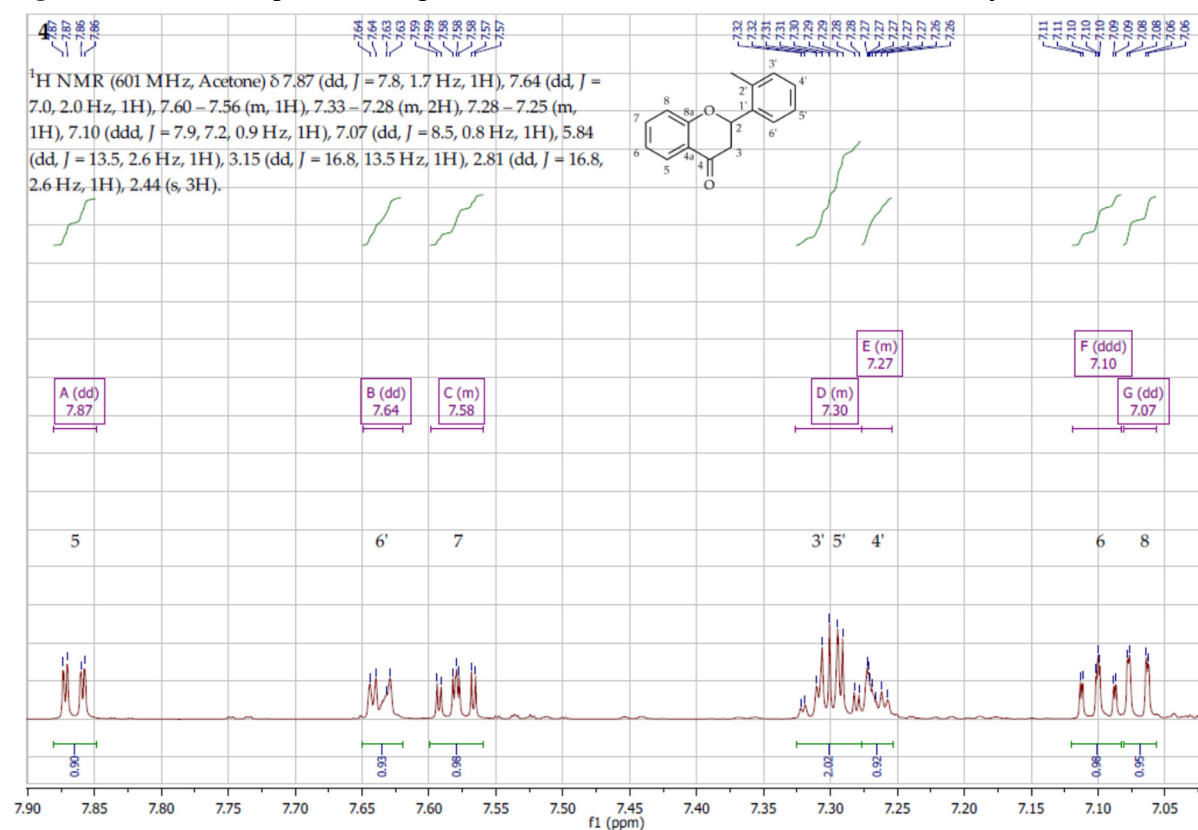

**Figure S4.**  $^1\text{H}$  NMR spectrum expansion ( $\delta$ , acetone- $d_6$ , 600 MHz) of 2'-methyflavanone (**4**)



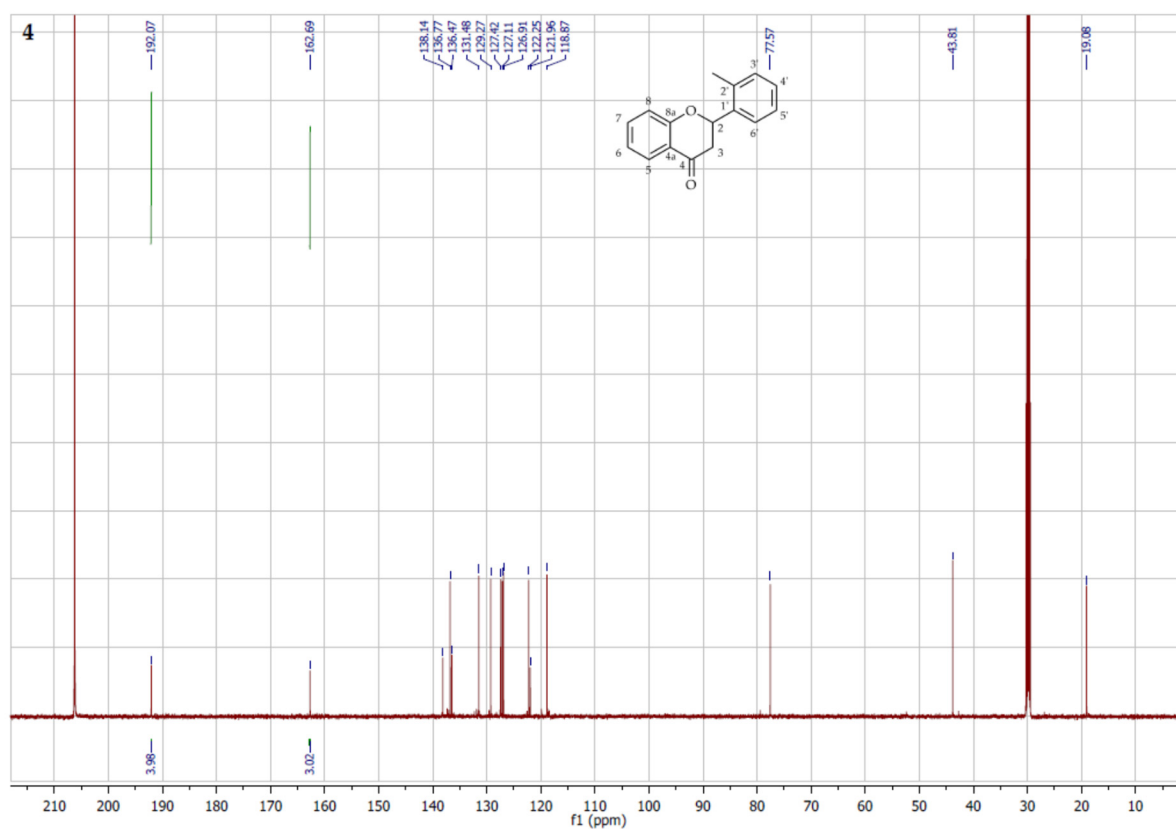

**Figure S5.**  $^{13}\text{C}$  NMR spectrum ( $\delta$ , acetone- $d_6$ , 151 MHz) of 2'-methyflavanone (**4**)

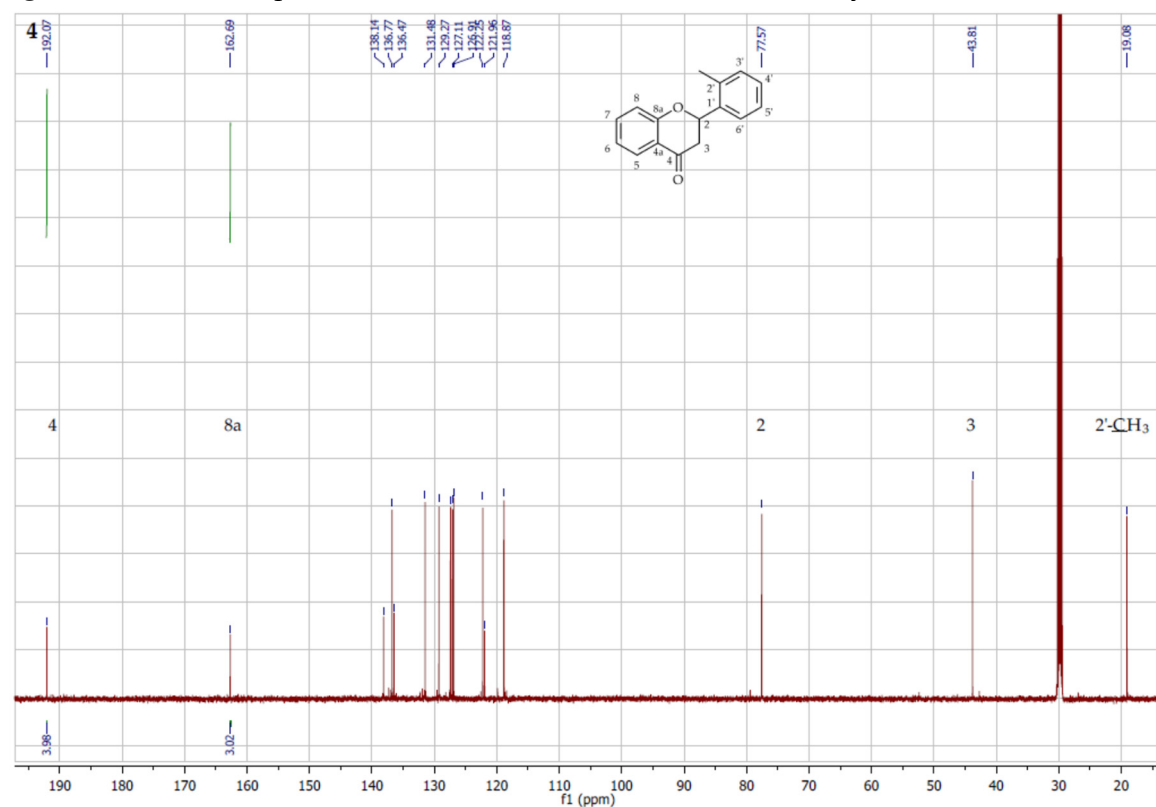

**Figure S6.**  $^{13}\text{C}$  NMR spectrum expansion ( $\delta$ , acetone- $d_6$ , 151 MHz) of 2'-methyflavanone (**4**)

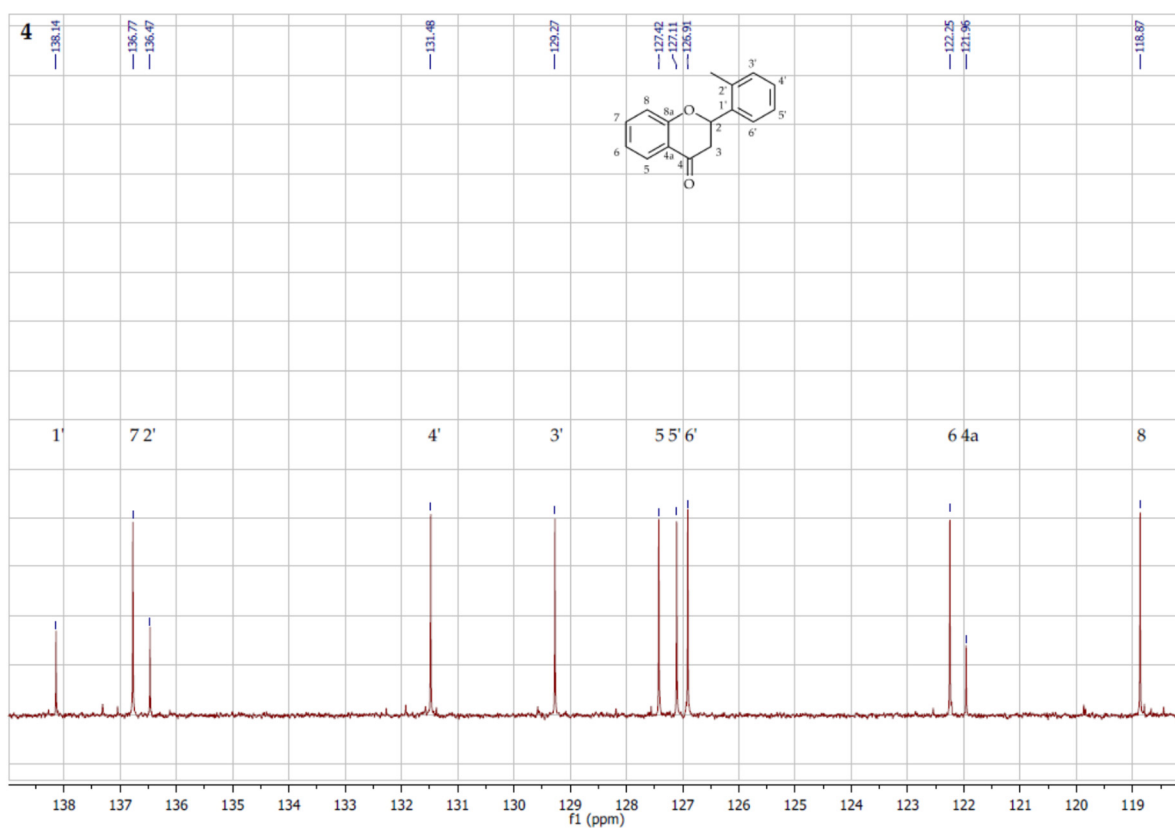

**Figure S7.**  $^{13}\text{C}$  NMR spectrum expansion ( $\delta$ , acetone- $d_6$ , 151 MHz) of 2'-methyflavanone (**4**)

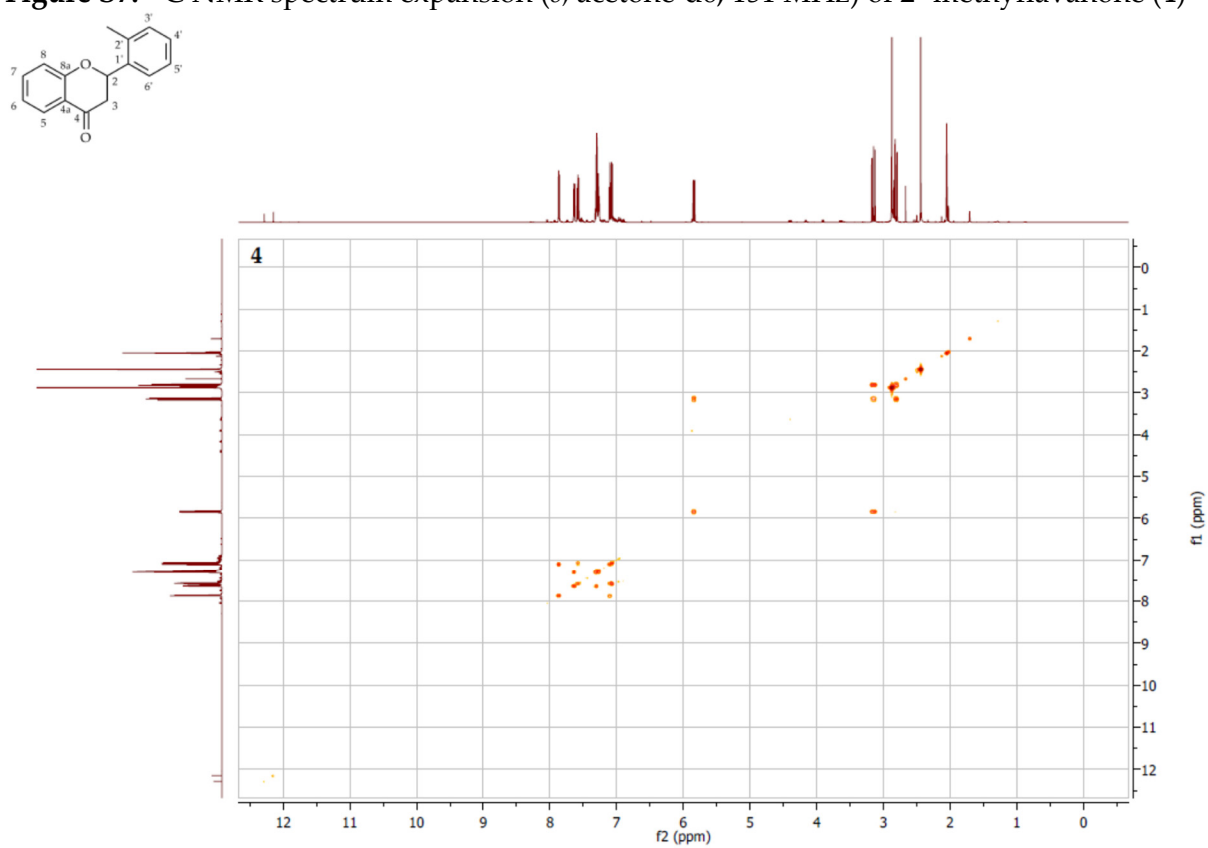

**Figure S8.** COSY contour map –  $^1\text{H} \times ^1\text{H}$  of 2'-methyflavanone (**4**)

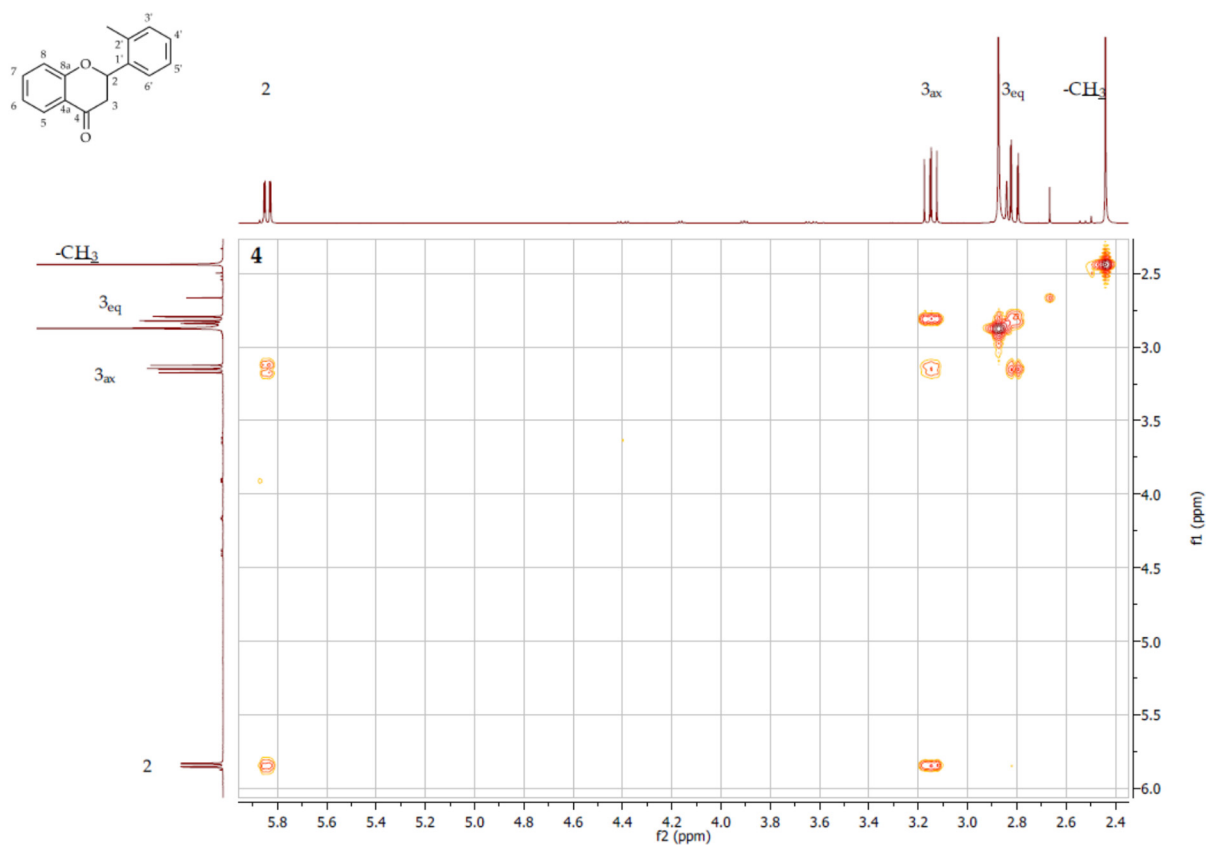

**Figure S9.** COSY contour map –  $^1\text{H} \times ^1\text{H}$  expansion of 2'-methyflavanone (4)

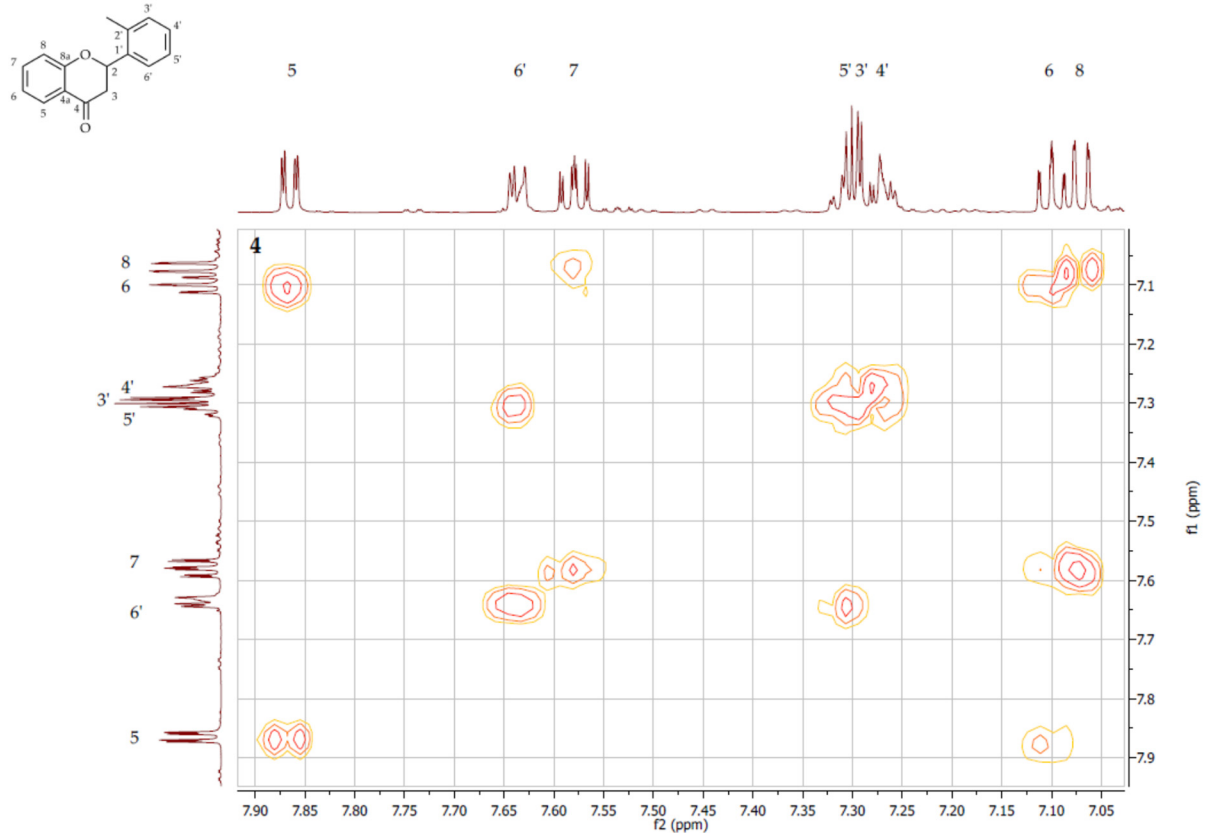

**Figure S10.** COSY contour map –  $^1\text{H} \times ^1\text{H}$  expansion of 2'-methyflavanone (4)

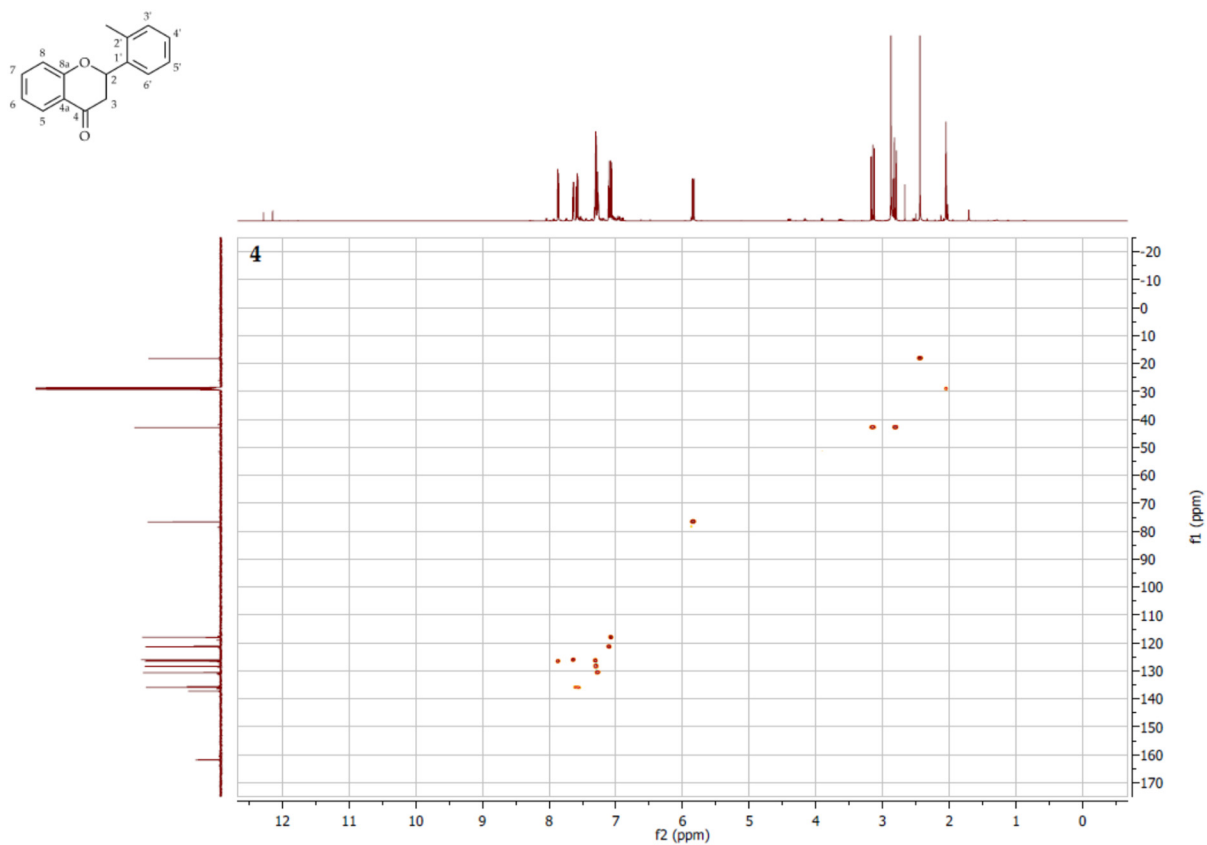

**Figure S11.** HSQC contour map –  $^1\text{H} \times ^{13}\text{C}$  of 2'-methyflavanone (4)

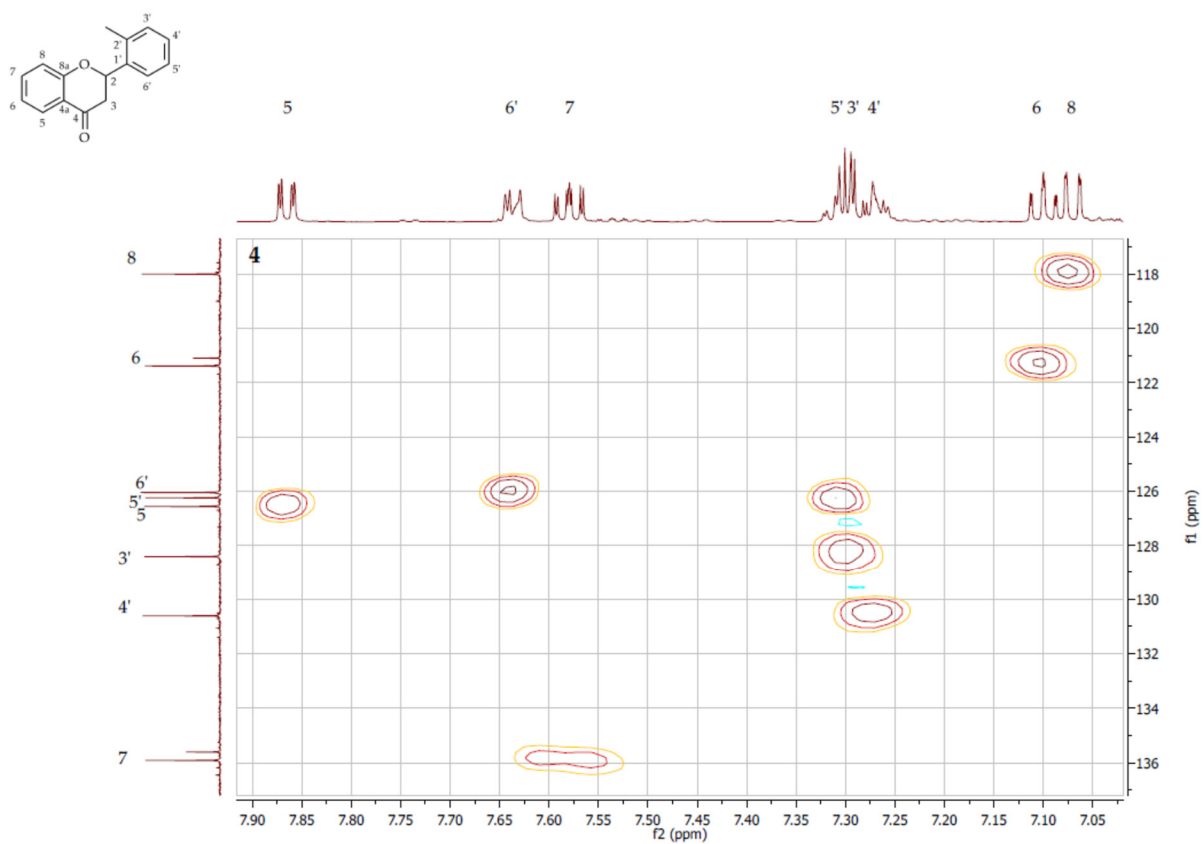

**Figure S12.** HSQC contour map –  $^1\text{H} \times ^{13}\text{C}$  expansion of 2'-methyflavanone (4)

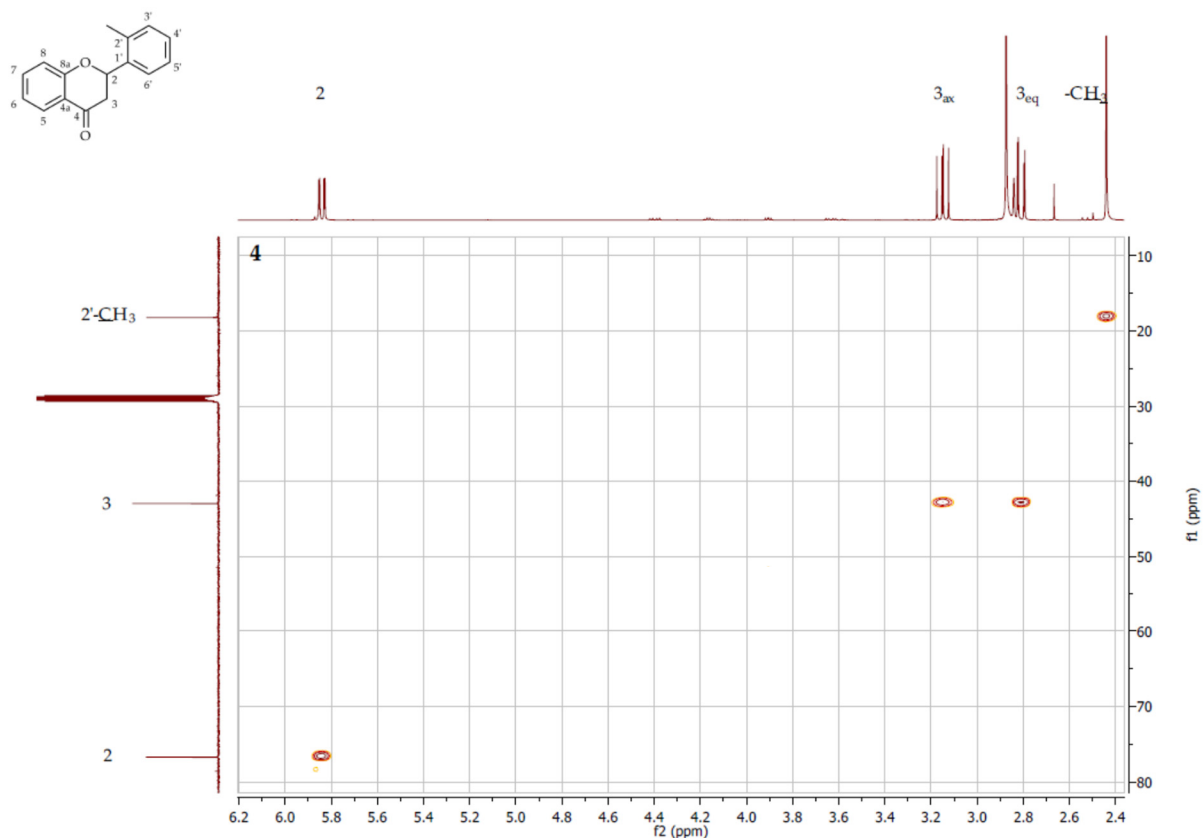

**Figure S13.** HSQC contour map –  $^1\text{H} \times ^{13}\text{C}$  expansion of 2'-methyflavanone (4)

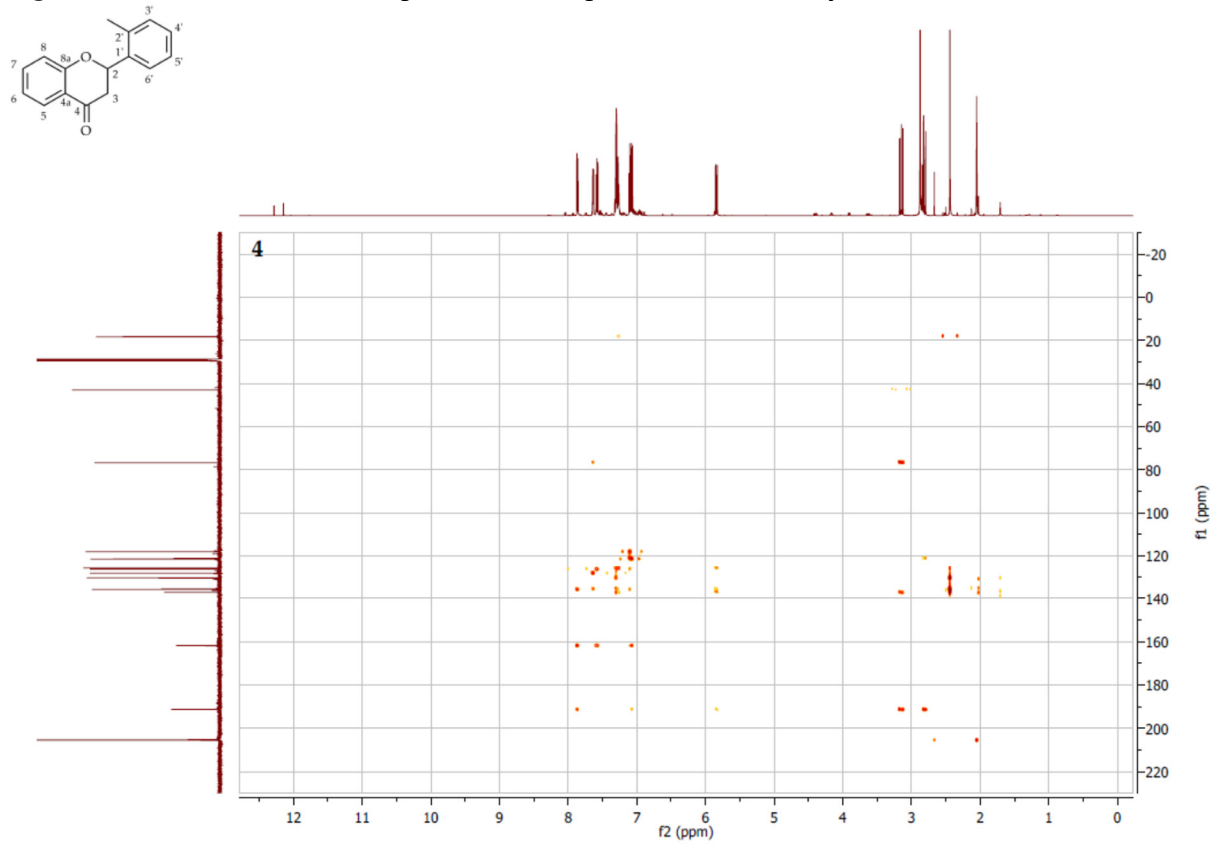

**Figure S14.** HMBC contour map –  $^1\text{H} \times ^{13}\text{C}$  of 2'-methyflavanone (4)

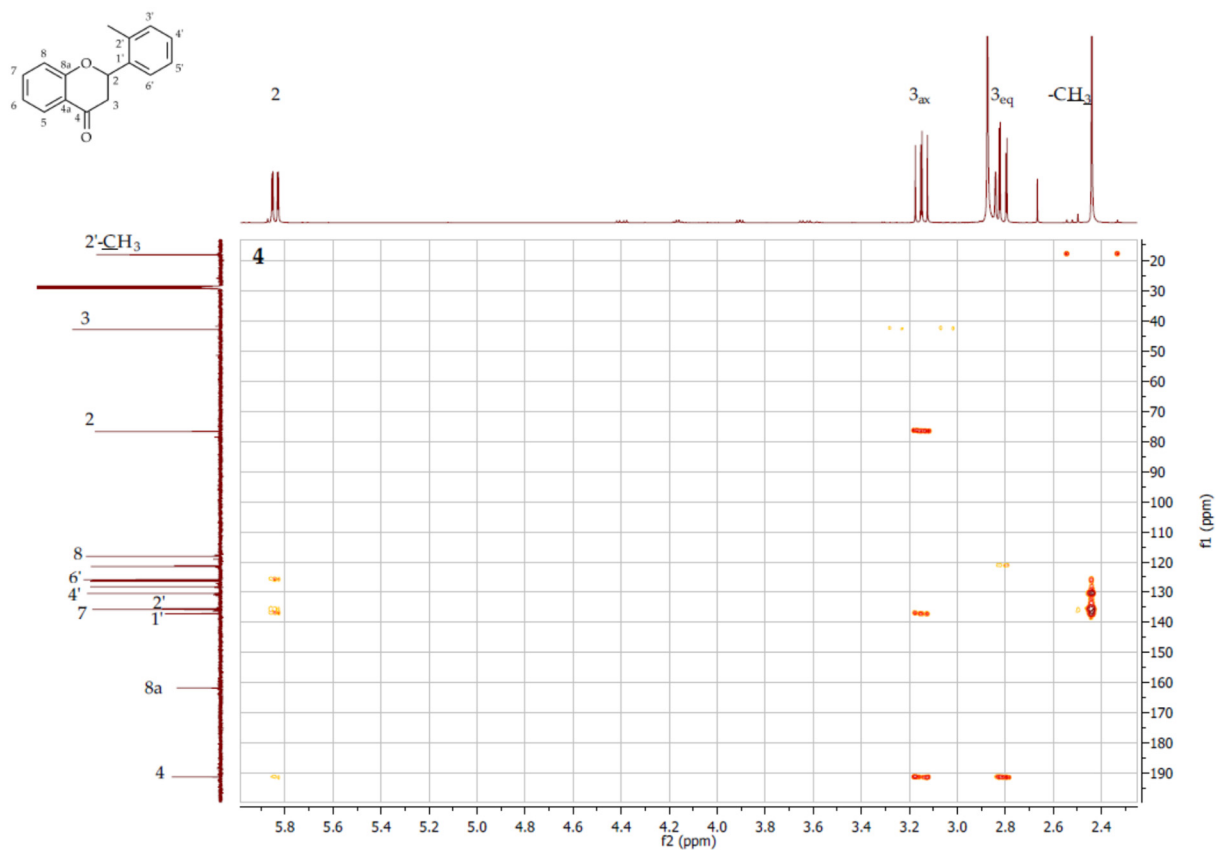

**Figure S15.** HMBC contour map –  $^1\text{H} \times ^{13}\text{C}$  expansion of 2'-methyflavanone (4)

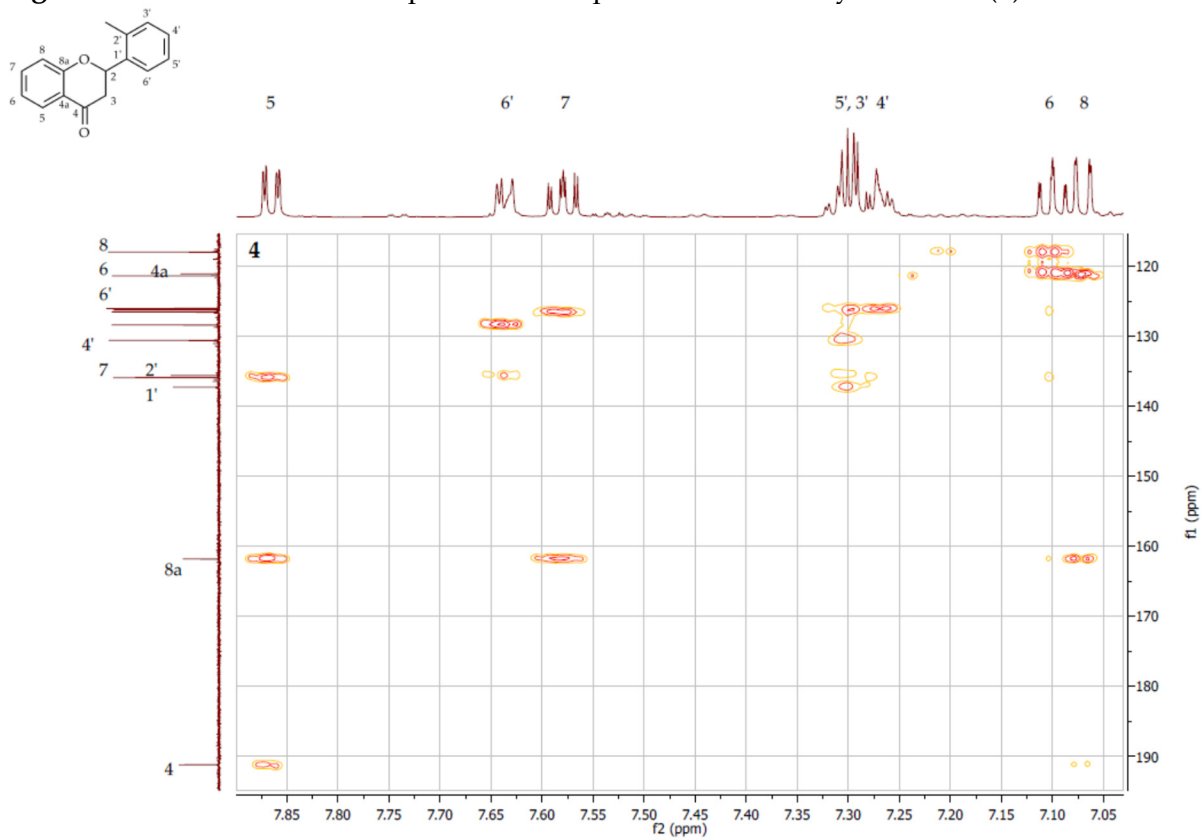

**Figure S16.** HMBC contour map –  $^1\text{H} \times ^{13}\text{C}$  expansion of 2'-methyflavanone (4)

Molecular formula: C<sub>23</sub>H<sub>26</sub>O<sub>8</sub>

Formula weight: 430.16

Ionization mode: positive

Precursor: [M + H]<sup>+</sup> 430.70

430.7000>311.2500 CE: -24.0

430.7000>226.8500 CE: -17.0

430.7000>362.9000 CE: -10.0

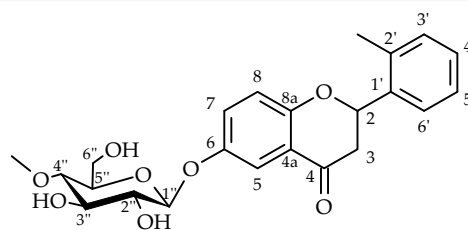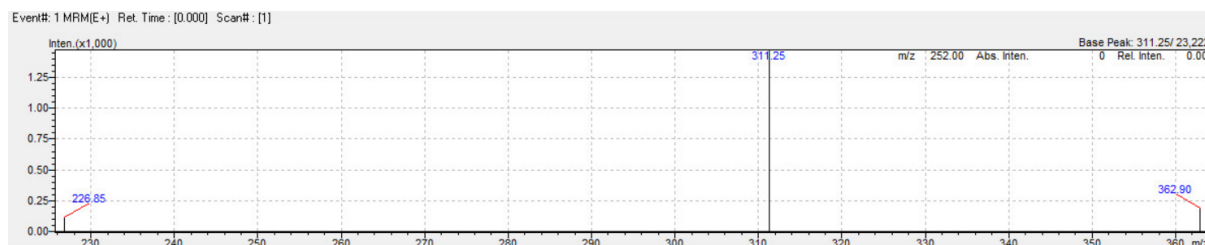

**Figure S17.** MS analysis of 2'-methylflavanone 6-O- $\beta$ -D-(4''-O-methyl)-glucopyranoside (**4a**)

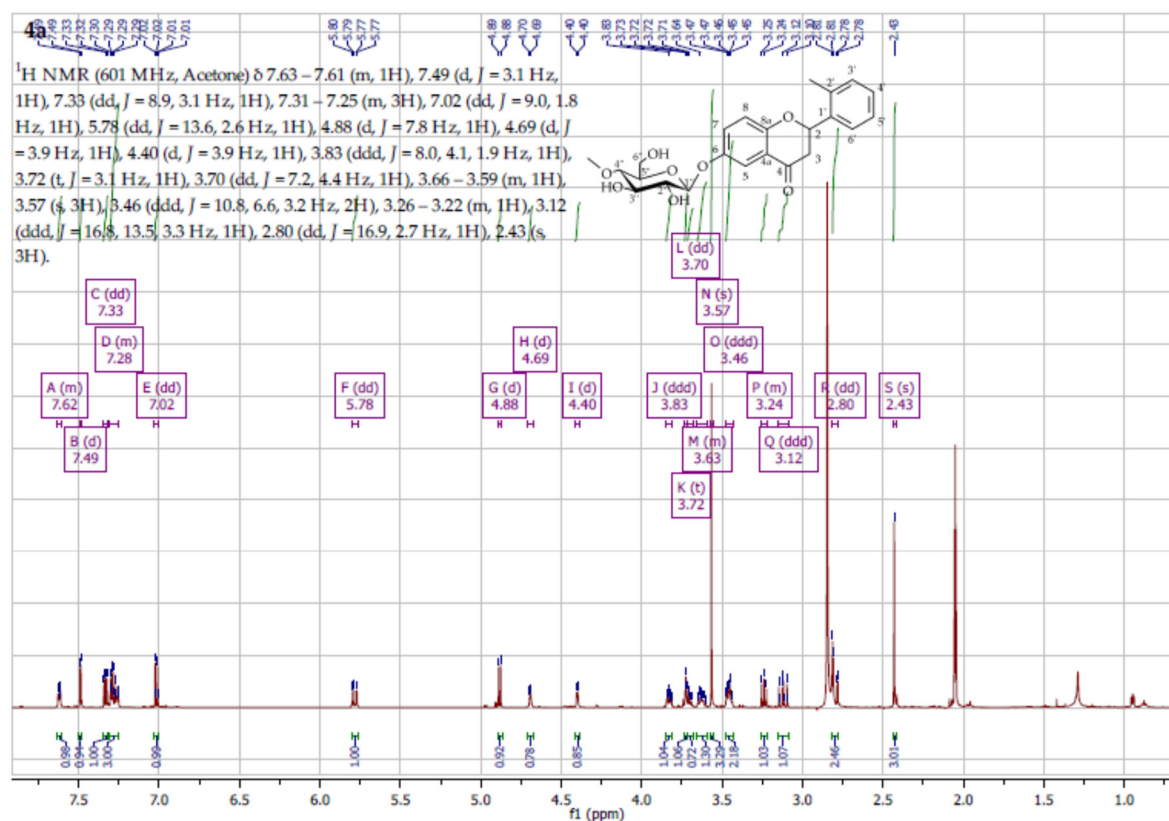

**Figure S18.** <sup>1</sup>H NMR spectrum ( $\delta$ , acetone-d<sub>6</sub>, 600 MHz) of 2'-methylflavanone 6-O- $\beta$ -D-(4''-O-methyl)-glucopyranoside (**4a**)

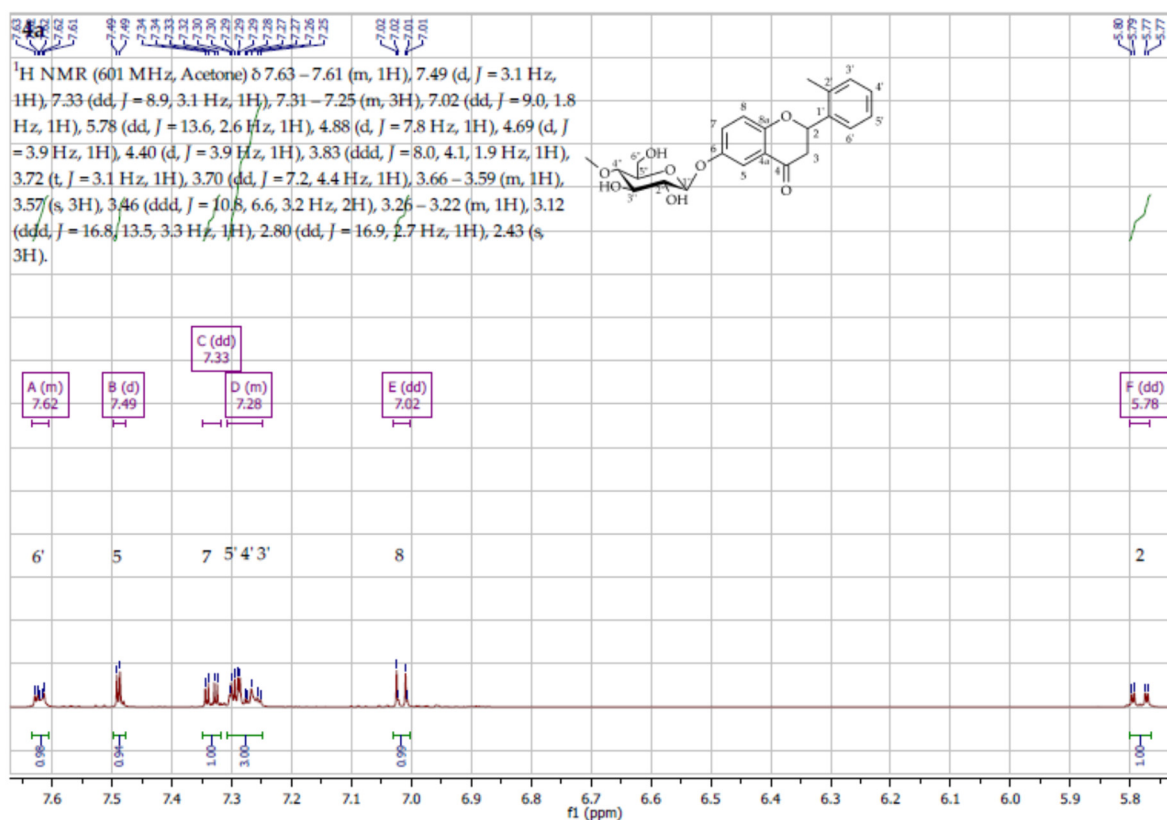

**Figure S19.** <sup>1</sup>H NMR spectrum expansion ( $\delta$ , acetone-d<sub>6</sub>, 600 MHz) of 2'-methylflavanone 6-*O*- $\beta$ -D-(4''-*O*-methyl)-glucopyranoside (**4a**)

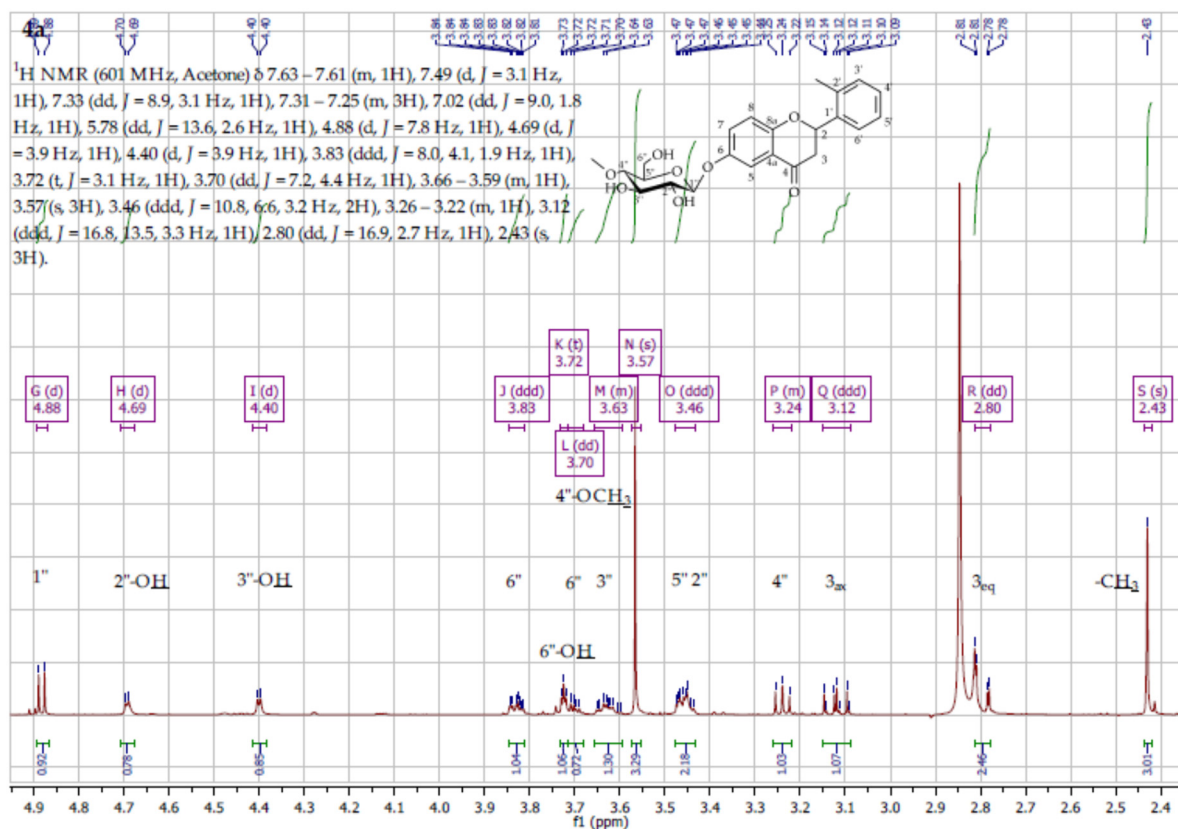

**Figure S20.** <sup>1</sup>H NMR spectrum expansion ( $\delta$ , acetone-d<sub>6</sub>, 600 MHz) of 2'-methylflavanone 6-*O*- $\beta$ -D-(4''-*O*-methyl)-glucopyranoside (**4a**)



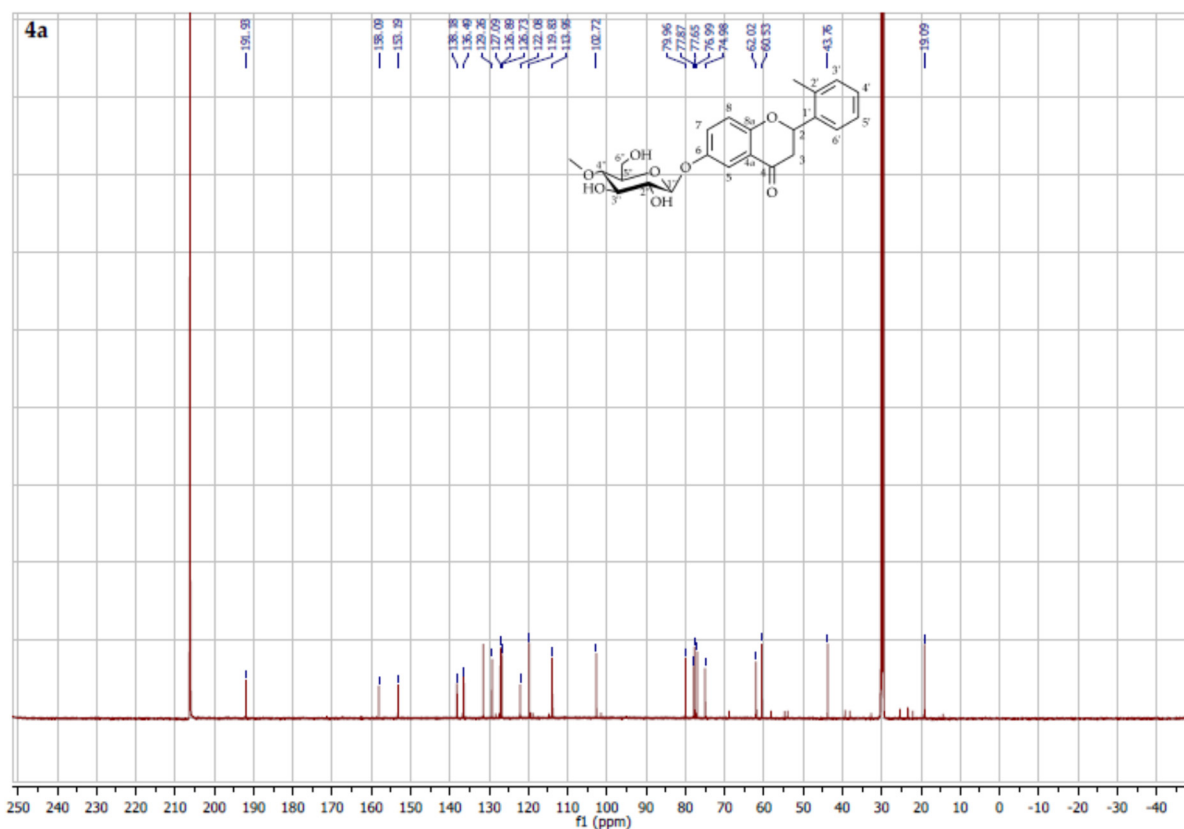

**Figure S21.**  $^{13}\text{C}$  NMR spectrum expansion ( $\delta$ , acetone- $d_6$ , 151 MHz) of 2'-methylflavanone 6-O- $\beta$ -D-(4''-O-methyl)-glucopyranoside (4a)

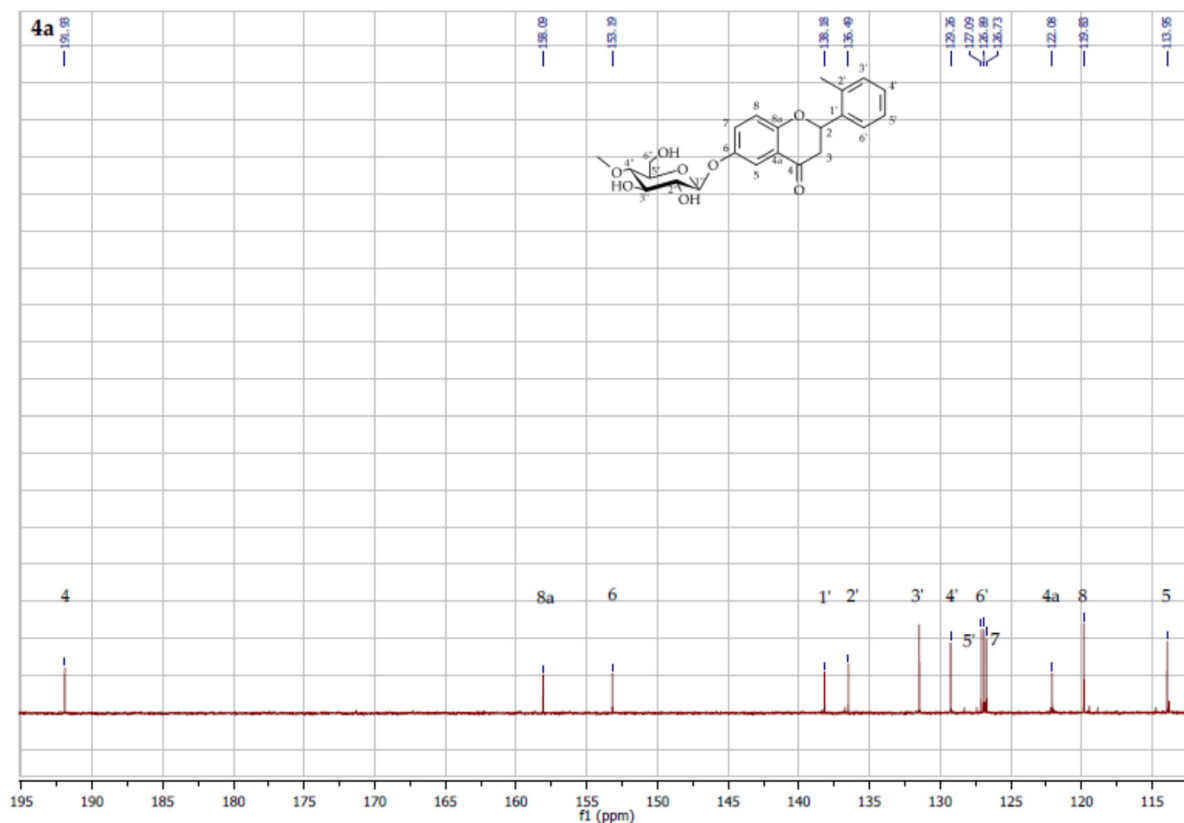

**Figure S22.**  $^{13}\text{C}$  NMR spectrum expansion ( $\delta$ , acetone- $d_6$ , 151 MHz) of 2'-methylflavanone 6-O- $\beta$ -D-(4''-O-methyl)-glucopyranoside (4a)

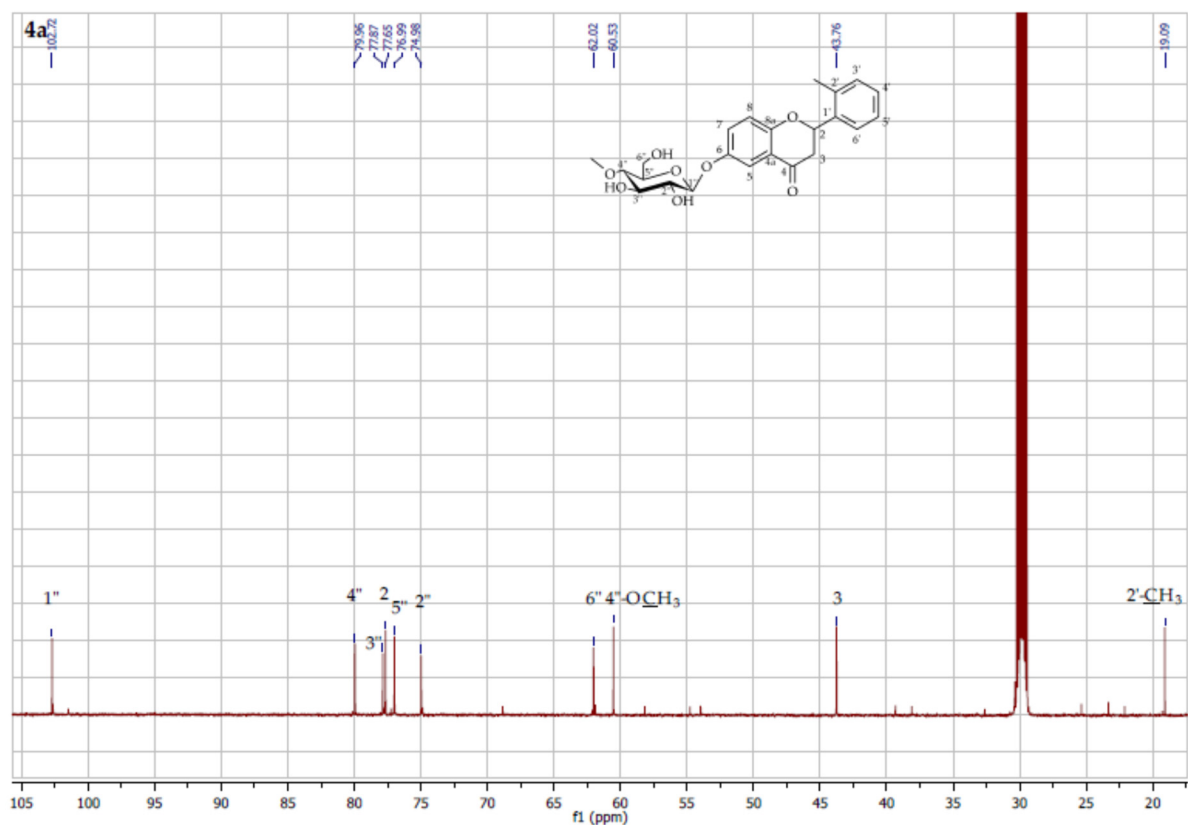

**Figure S23.**  $^{13}\text{C}$  NMR spectrum expansion ( $\delta$ , acetone- $d_6$ , 151 MHz) of 2'-methylflavanone 6-O- $\beta$ -D-(4''-O-methyl)-glucopyranoside (**4a**)

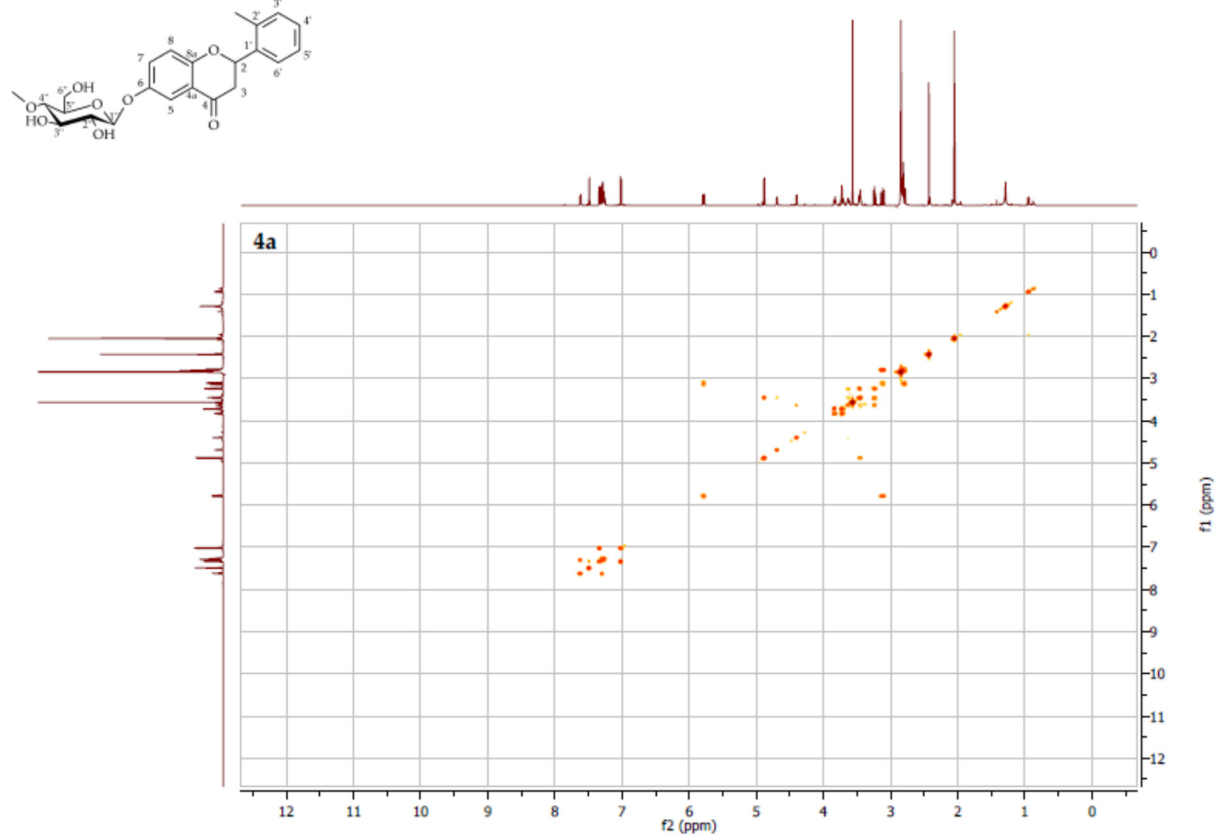

**Figure S24.** COSY contour map –  $^1\text{H} \times ^1\text{H}$  of 2'-methylflavanone 6-O- $\beta$ -D-(4''-O-methyl)-glucopyranoside (**4a**)

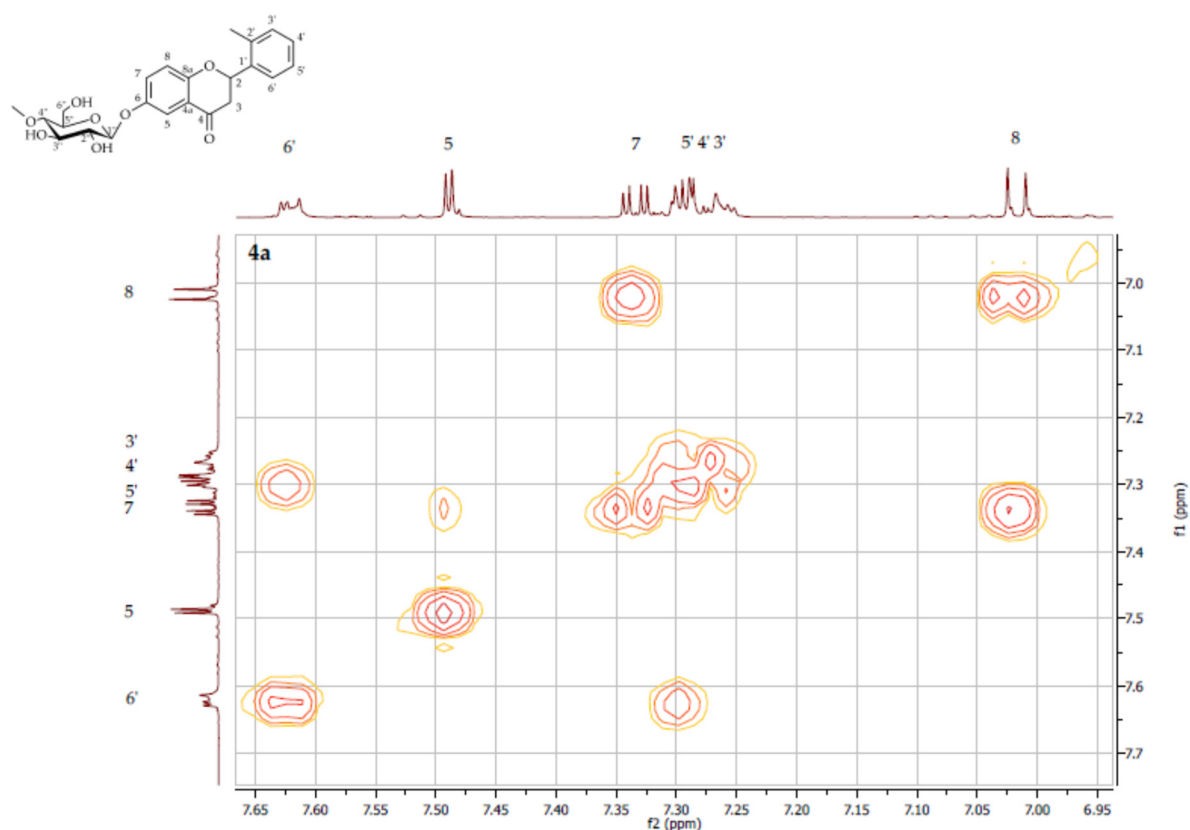

**Figure S25.** COSY contour map –  $^1\text{H} \times ^1\text{H}$  expansion of 2'-methylflavanone 6-O- $\beta$ -D-(4''-O-methyl)-glucopyranoside (**4a**)

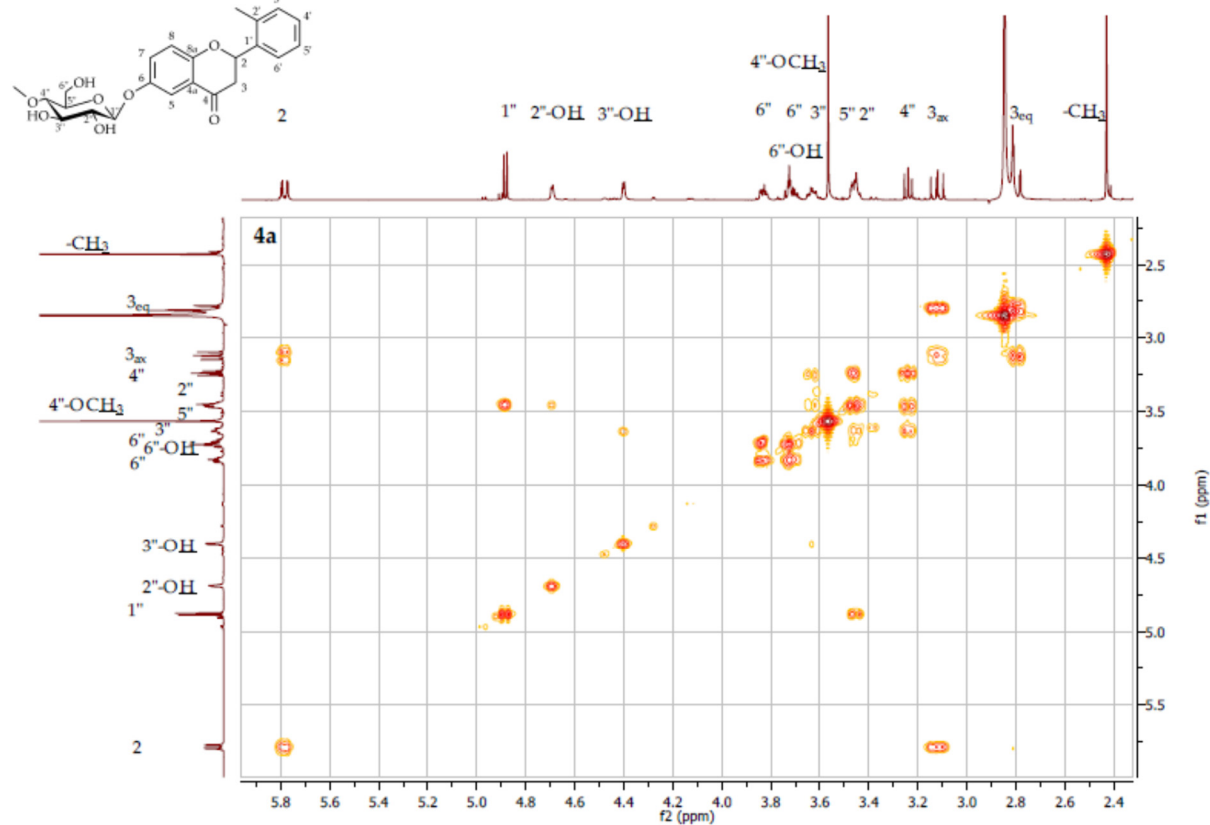

**Figure S26.** COSY contour map –  $^1\text{H} \times ^1\text{H}$  expansion of 2'-methylflavanone 6-O- $\beta$ -D-(4''-O-methyl)-glucopyranoside (**4a**)

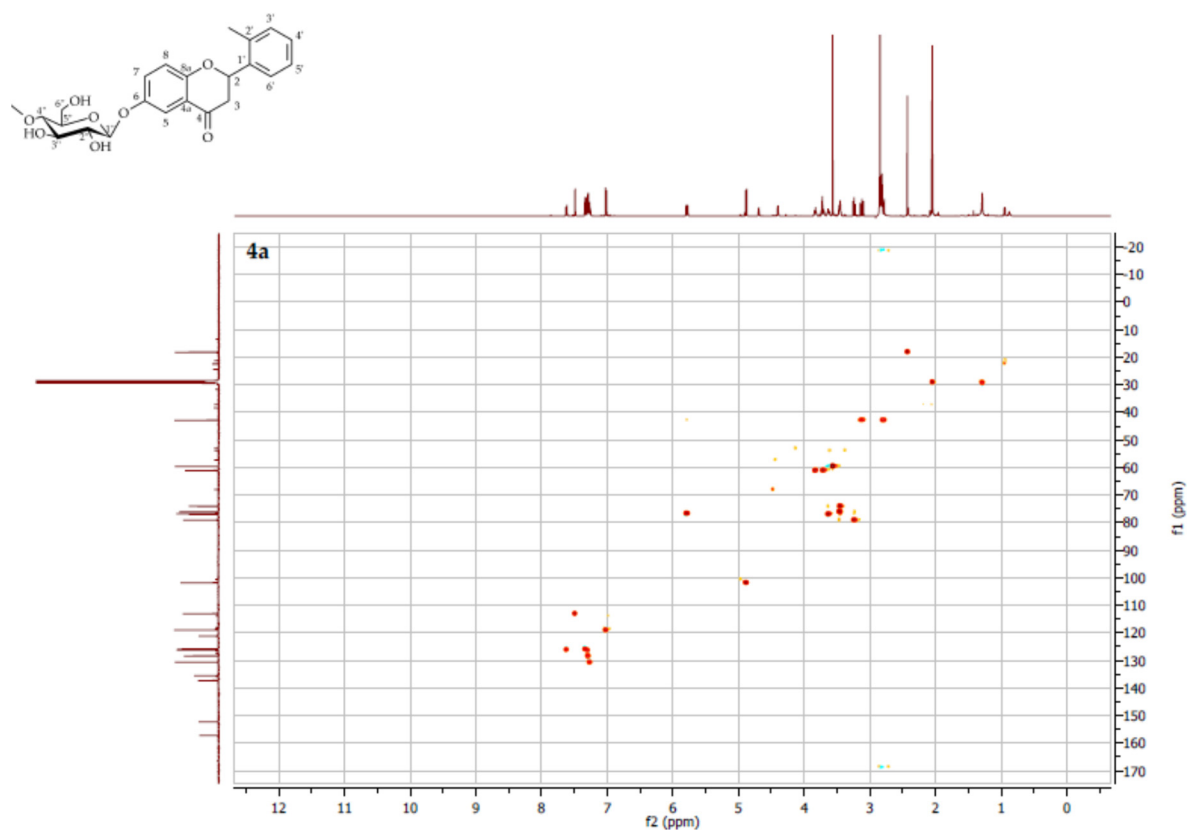

**Figure S27.** HSQC contour map –  $^1\text{H} \times ^{13}\text{C}$  of 2'-methylflavanone 6-*O*- $\beta$ -D-(4''-*O*-methyl)-glucopyranoside (**4a**)

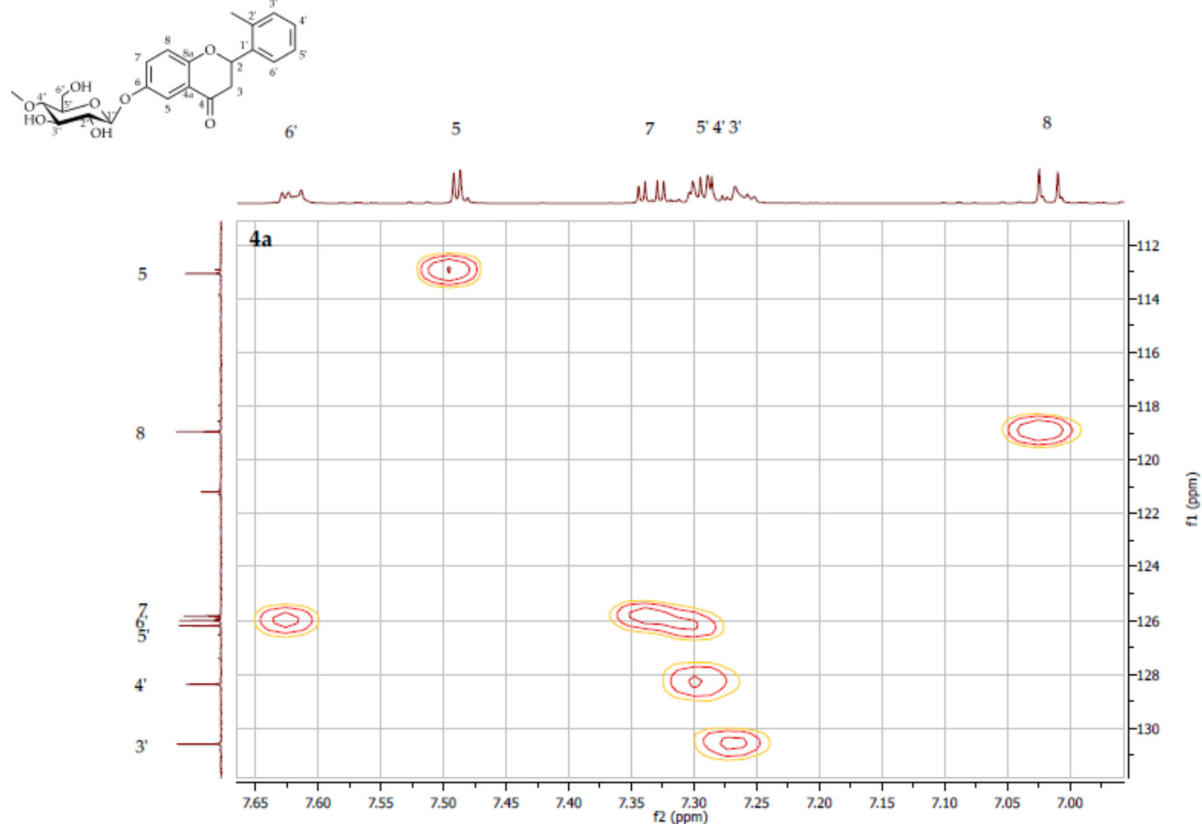

**Figure S28.** HSQC contour map –  $^1\text{H} \times ^{13}\text{C}$  expansion of 2'-methylflavanone 6-*O*- $\beta$ -D-(4''-*O*-methyl)-glucopyranoside (**4a**)

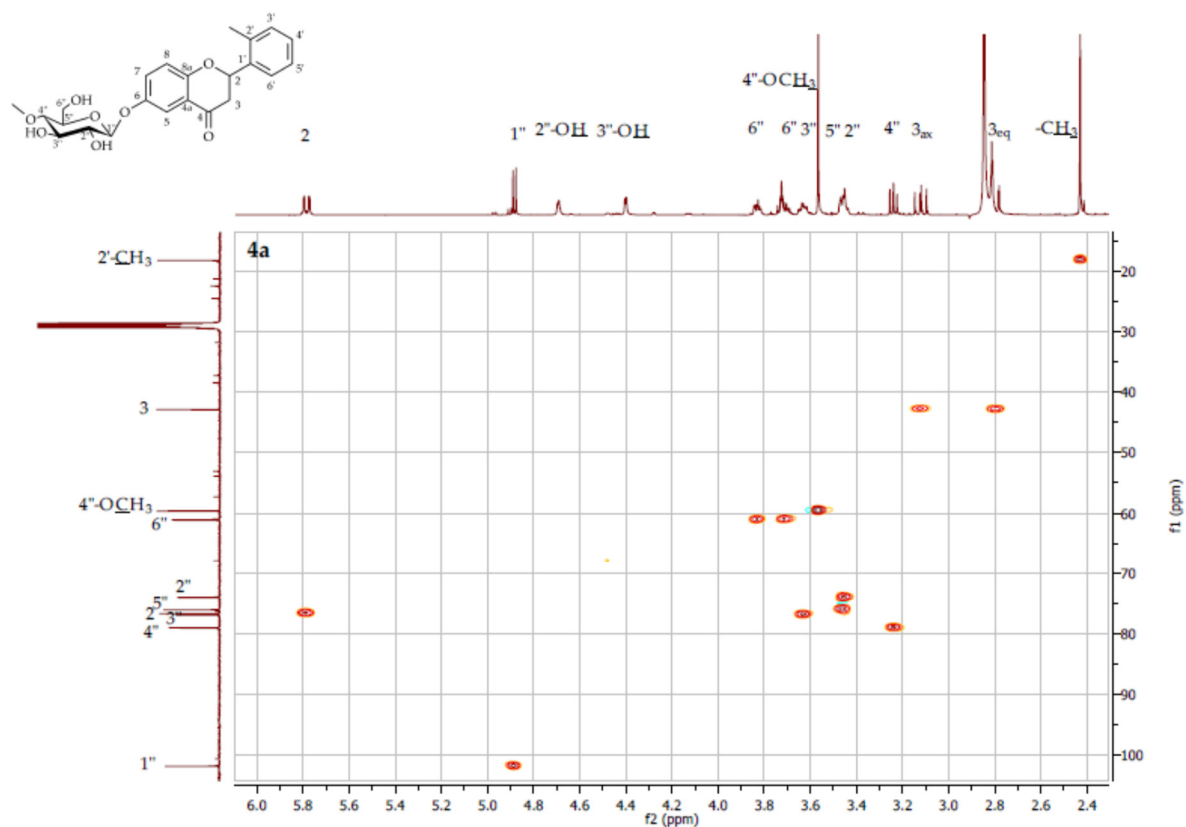

**Figure S29.** HSQC contour map –  $^1\text{H} \times ^{13}\text{C}$  expansion of 2'-methylflavanone 6-O- $\beta$ -D-(4''-O-methyl)-glucopyranoside (**4a**)

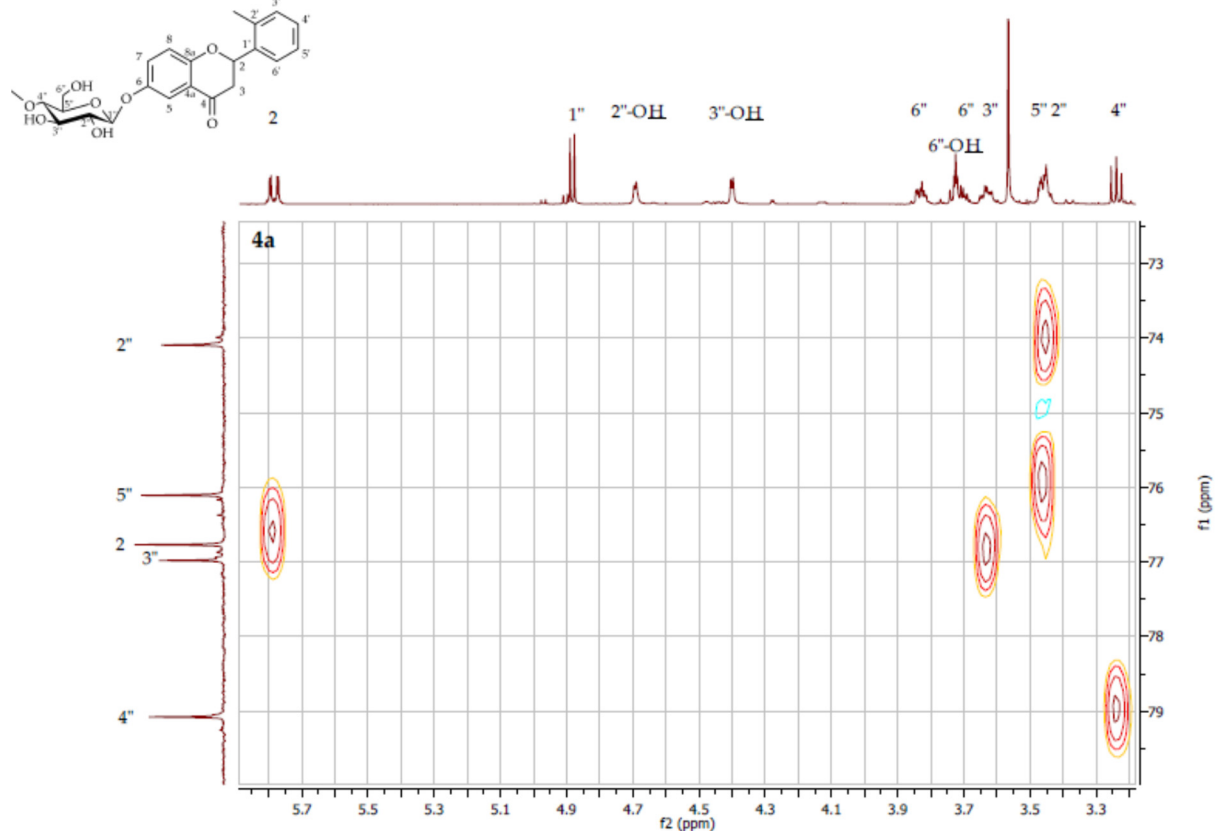

**Figure S30.** HSQC contour map –  $^1\text{H} \times ^{13}\text{C}$  expansion of 2'-methylflavanone 6-O- $\beta$ -D-(4''-O-methyl)-glucopyranoside (**4a**)

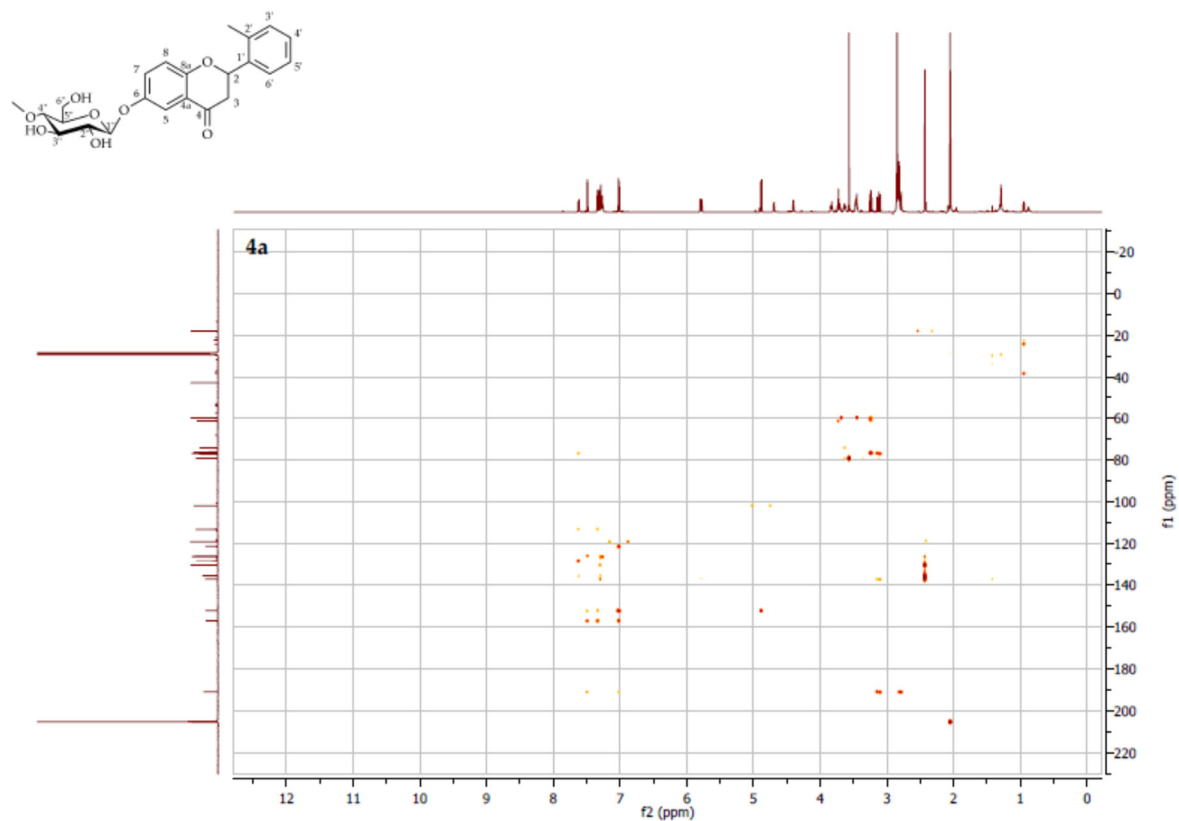

**Figure S31.** HMBC contour map –  $^1\text{H} \times ^{13}\text{C}$  of 2'-methylflavanone 6-*O*- $\beta$ -D-(4''-*O*-methyl)-glucopyranoside (**4a**)

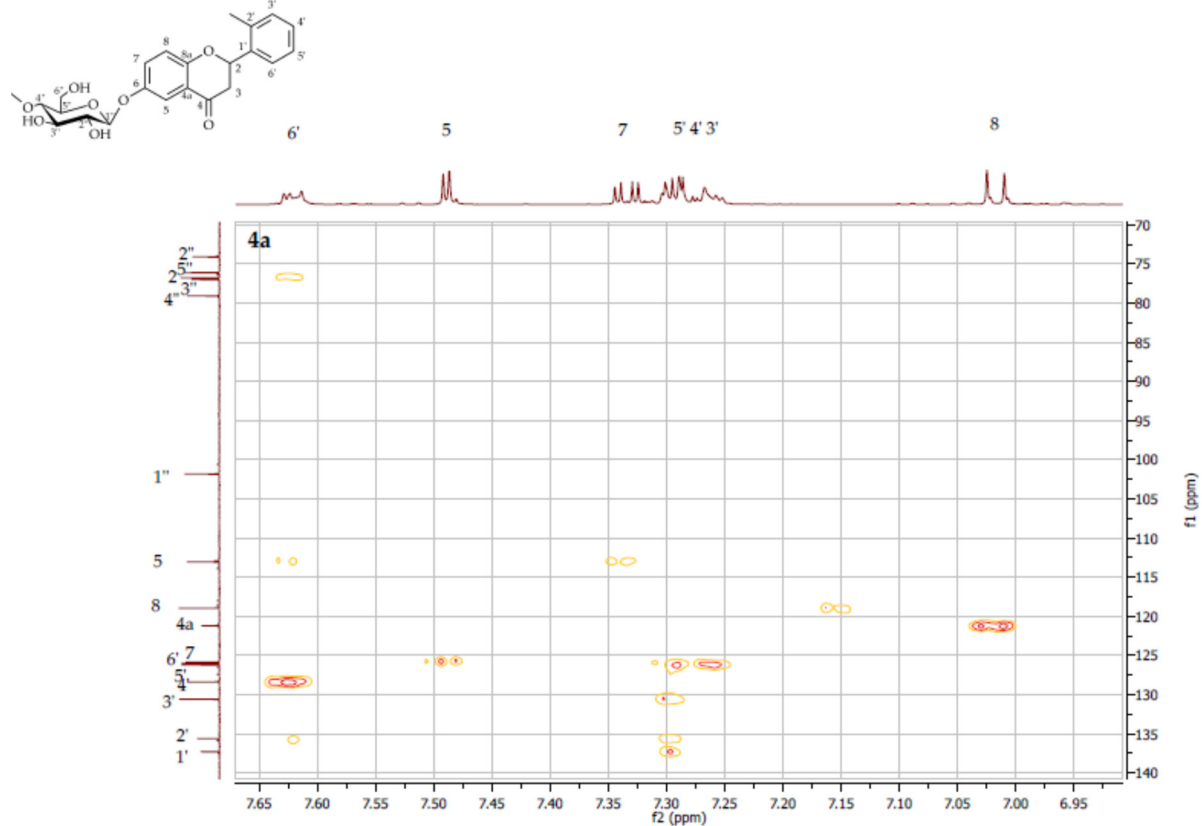

**Figure S32.** HMBC contour map –  $^1\text{H} \times ^{13}\text{C}$  expansion of 2'-methylflavanone 6-*O*- $\beta$ -D-(4''-*O*-methyl)-glucopyranoside (**4a**)

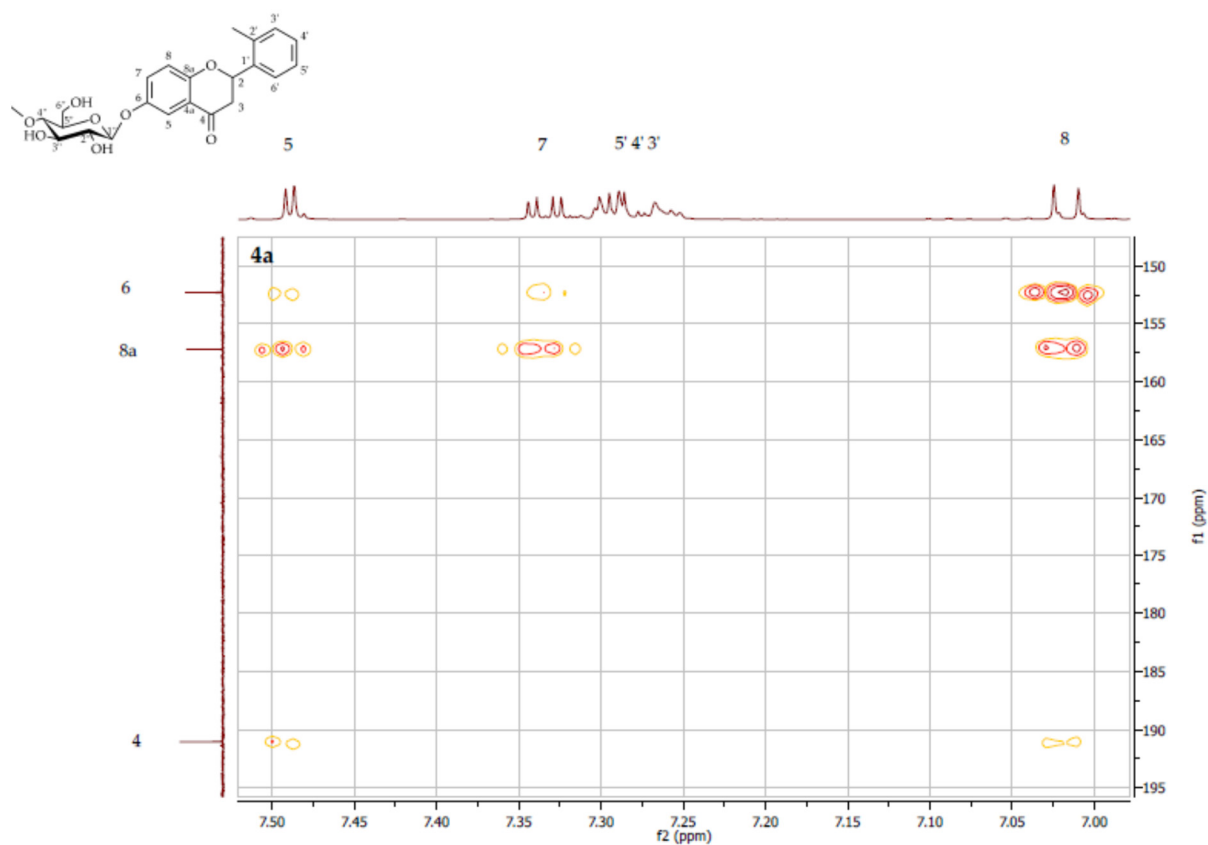

**Figure S33.** HMBC contour map –  $^1\text{H} \times ^{13}\text{C}$  expansion of 2'-methylflavanone 6-O- $\beta$ -D-(4''-O-methyl)-glucopyranoside (**4a**)

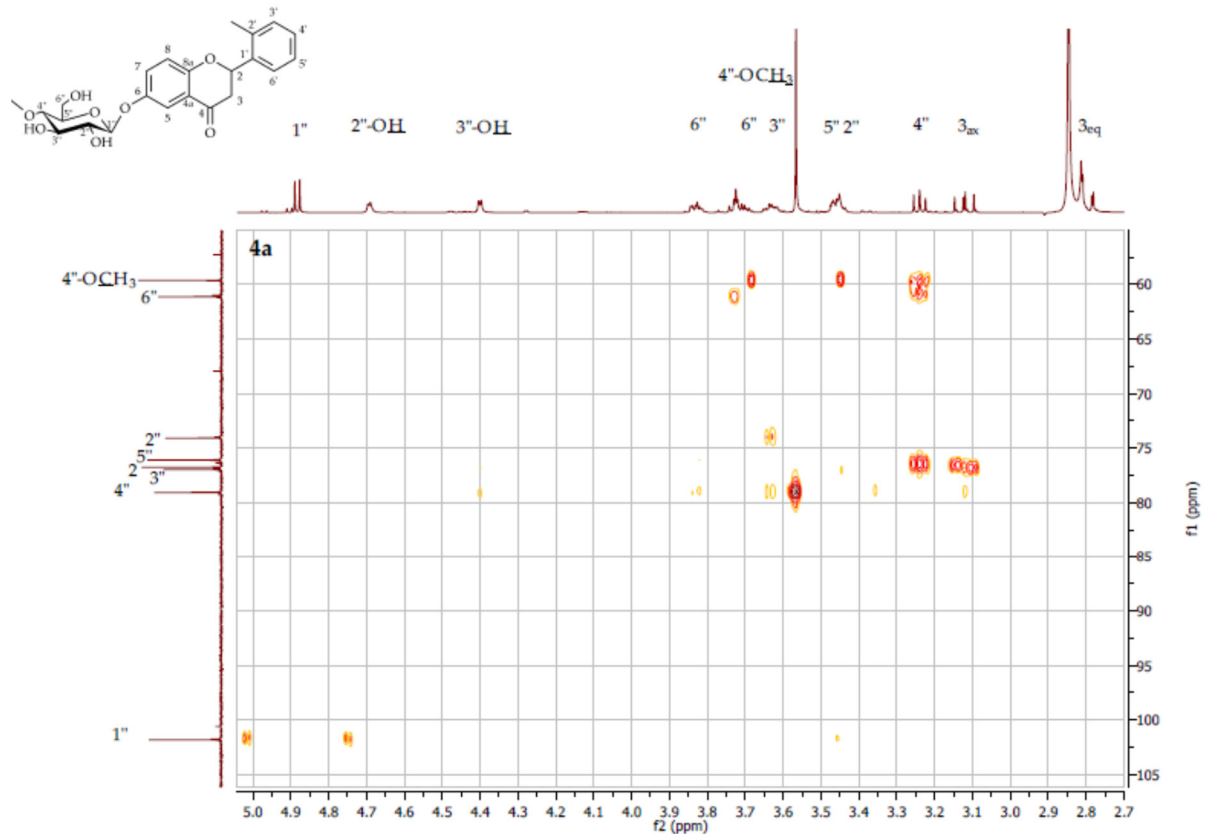

**Figure S34.** HMBC contour map –  $^1\text{H} \times ^{13}\text{C}$  expansion of 2'-methylflavanone 6-O- $\beta$ -D-(4''-O-methyl)-glucopyranoside (**4a**)

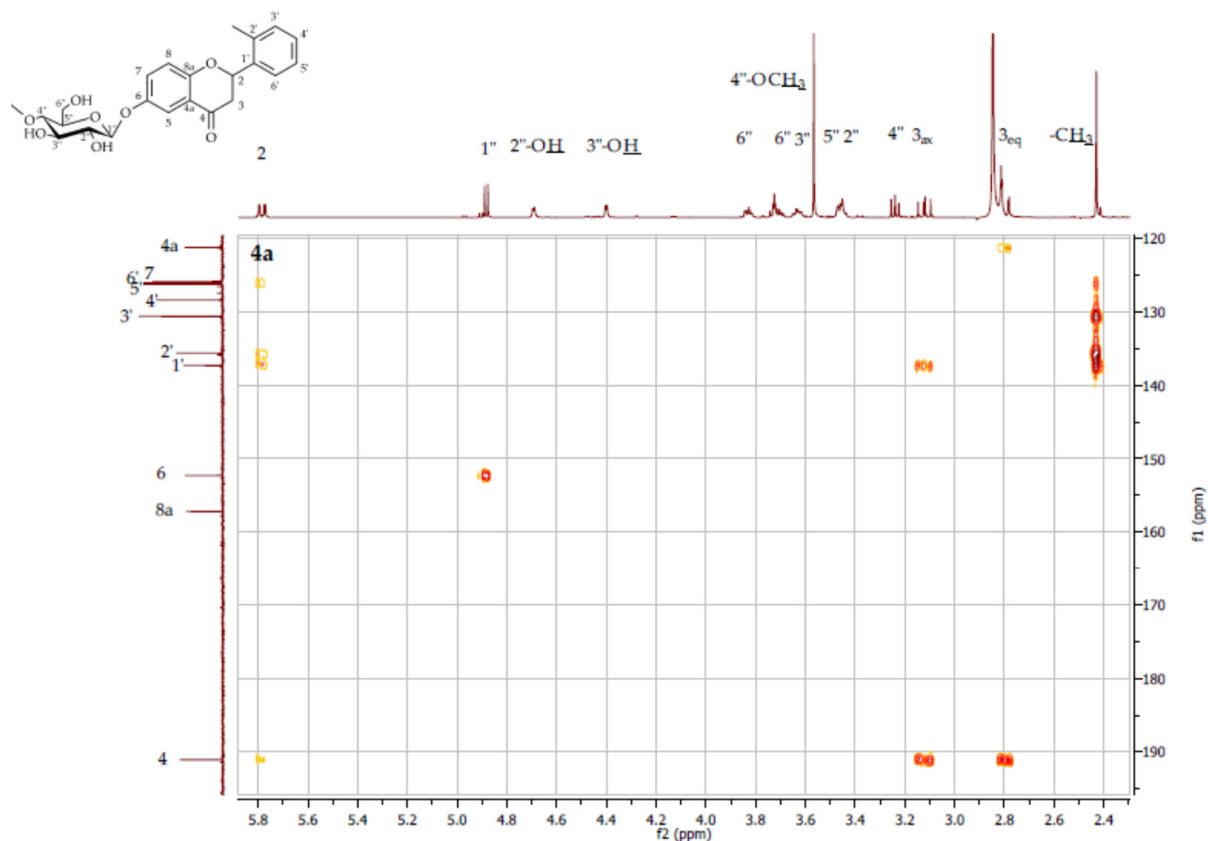

**Figure S35.** HMBC contour map – <sup>1</sup>H × <sup>13</sup>C expansion of 2'-methylflavanone 6-O-β-D-(4''-O-methyl)-glucopyranoside (4a)

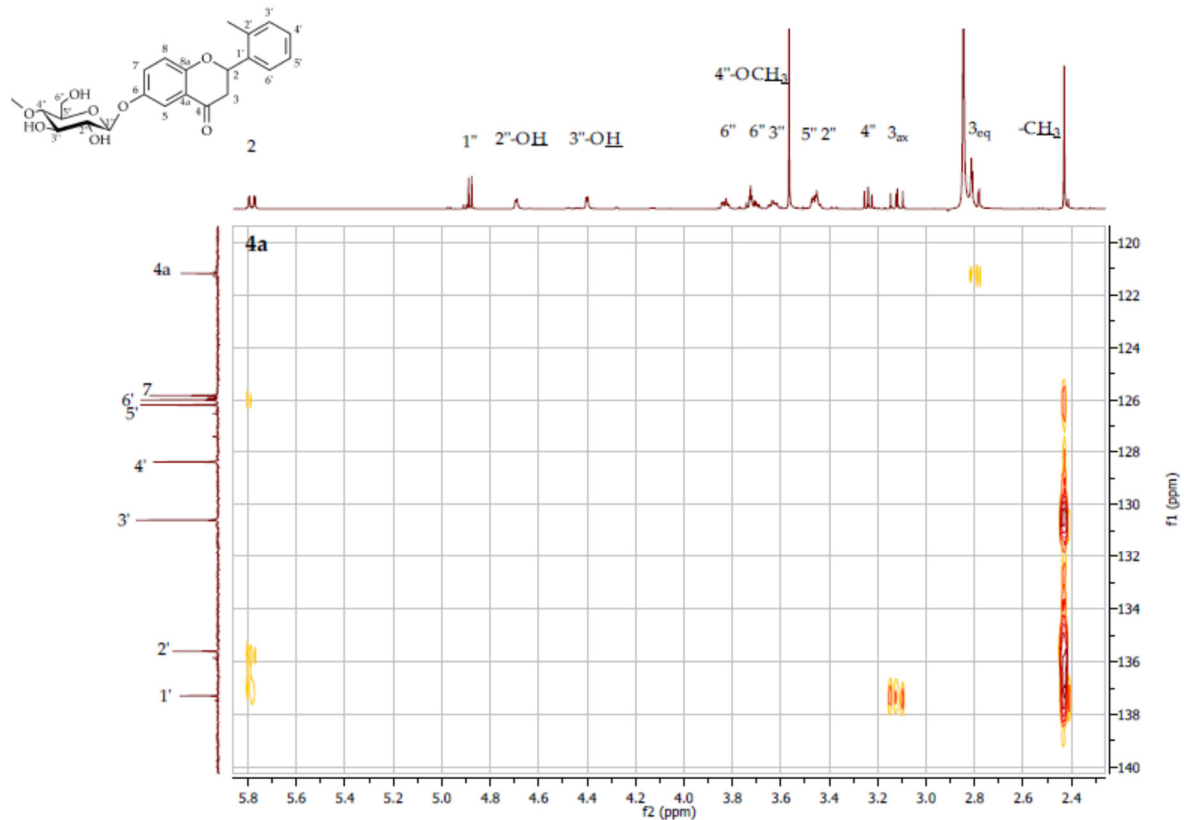

**Figure S36.** HMBC contour map – <sup>1</sup>H × <sup>13</sup>C expansion of 2'-methylflavanone 6-O-β-D-(4''-O-methyl)-glucopyranoside (4a)



Molecular formula: C<sub>23</sub>H<sub>26</sub>O<sub>9</sub>

Formula weight: 446.16

Ionization mode: negative

Precursor: [M - H]<sup>-</sup> 445.30

445.3000 > 269.0500 CE: 18.0

445.3000 > 251.1000 CE: 29.0

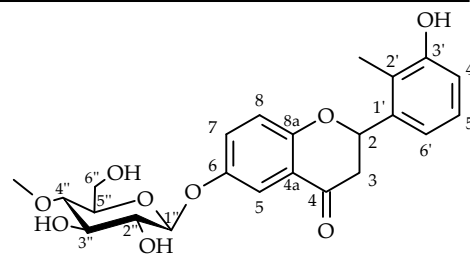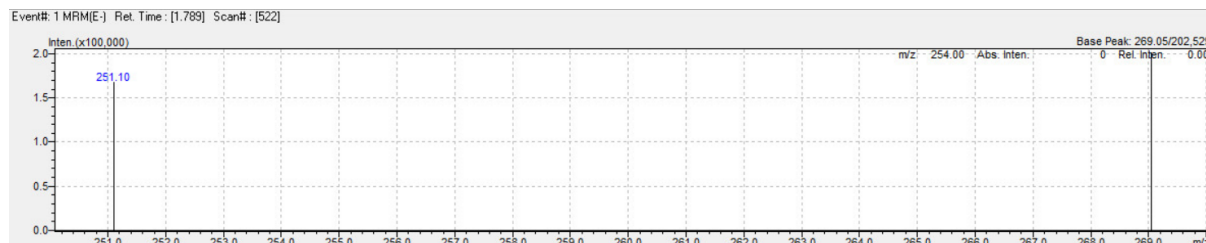

**Figure S37.** MS analysis of 3'-hydroxy-2'-methylflavanone 6-O- $\beta$ -D-(4''-O-methyl)-glucopyranoside (**4b**)

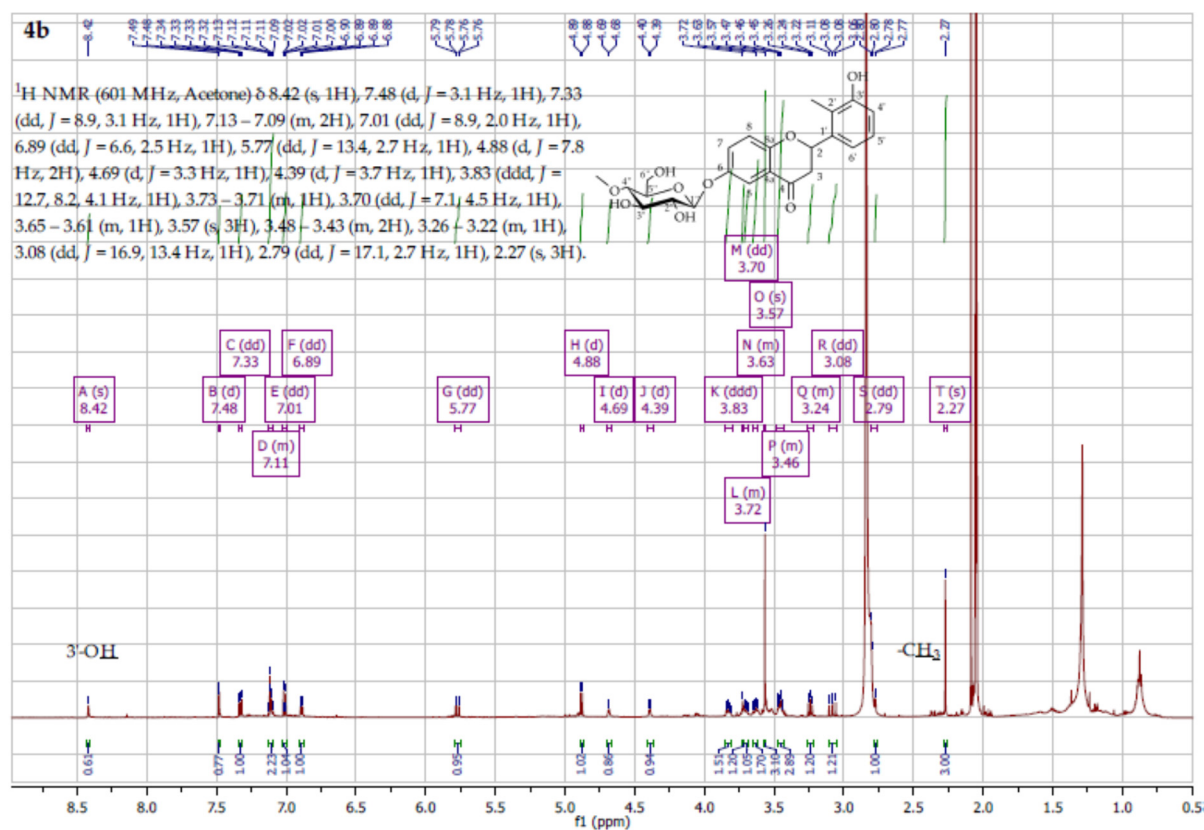

**Figure S38.** <sup>1</sup>H NMR spectrum ( $\delta$ , acetone-*d*<sub>6</sub>, 600 MHz) of 3'-hydroxy-2'-methylflavanone 6-O- $\beta$ -D-(4''-O-methyl)-glucopyranoside (**4b**)

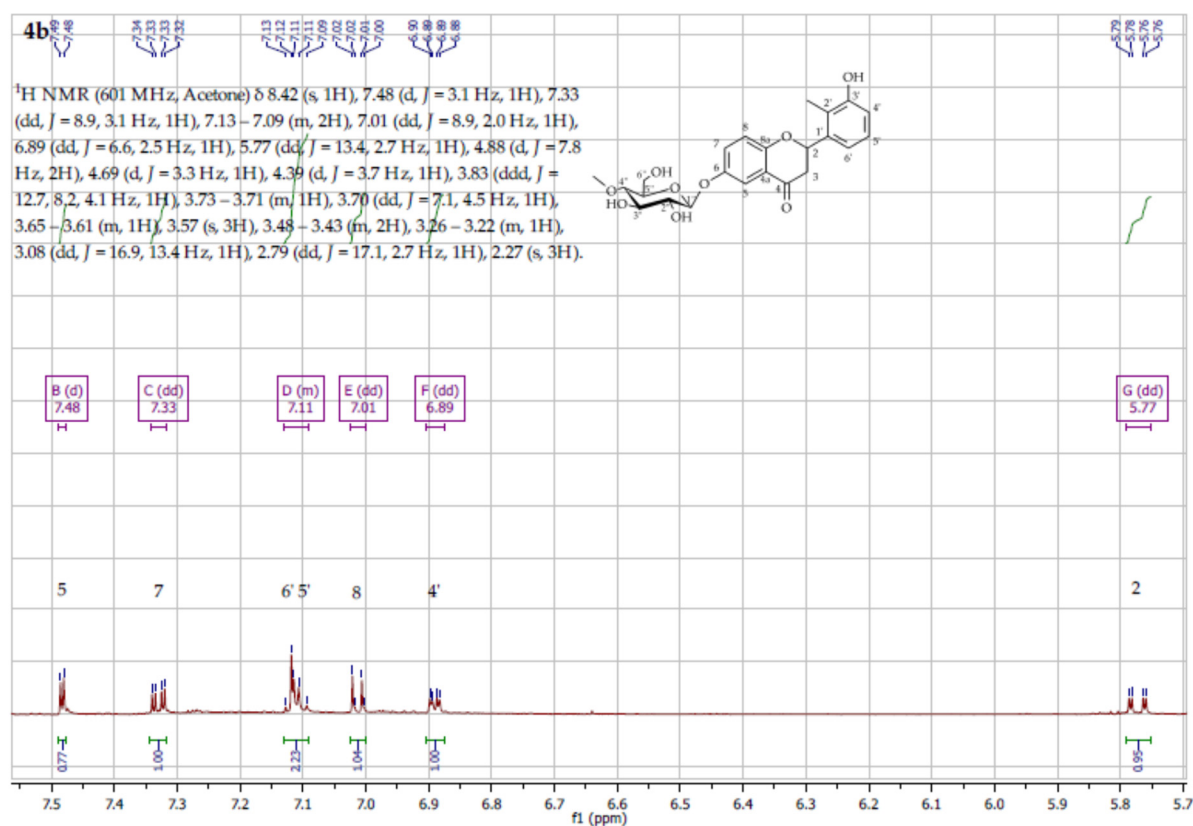

**Figure S39.** <sup>1</sup>H NMR spectrum expansion (δ, acetone-d<sub>6</sub>, 600 MHz) of 3'-hydroxy-2'-methylflavanone 6-*O*-β-D-(4''-*O*-methyl)-glucopyranoside (**4b**)

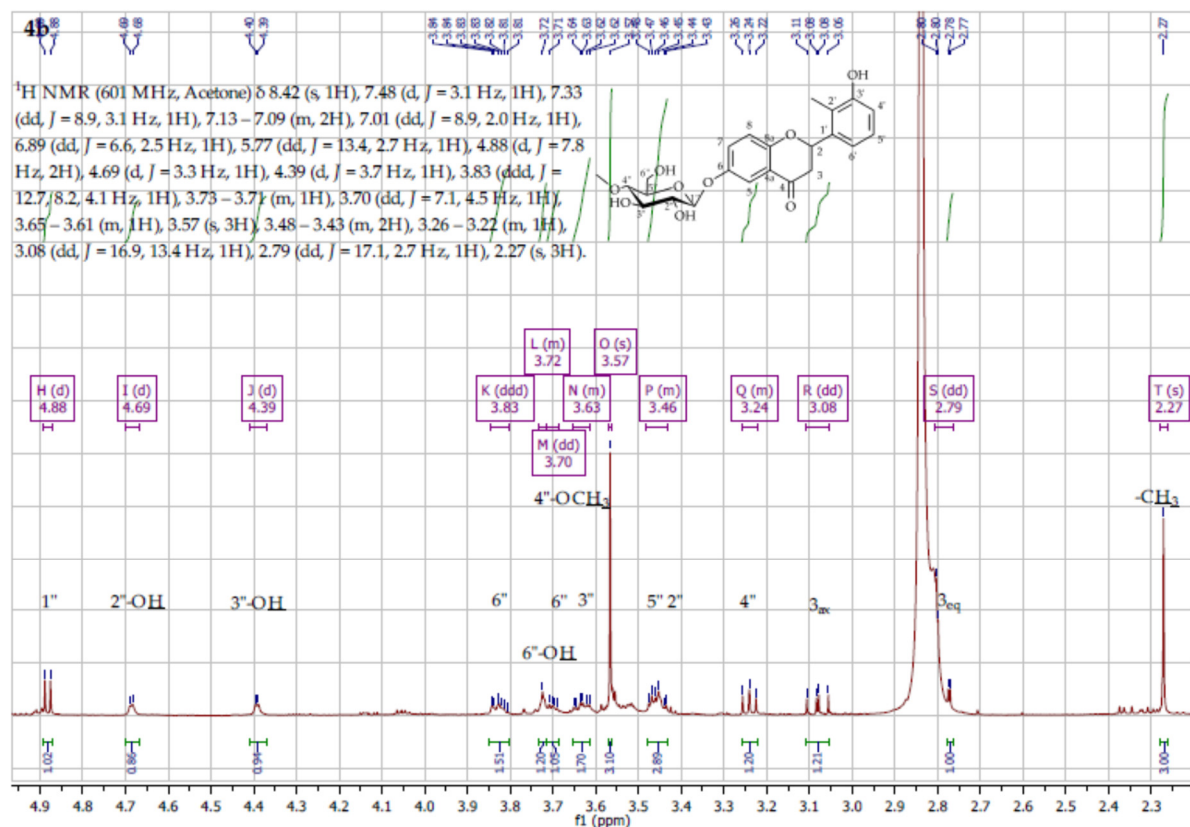

**Figure S40.** <sup>1</sup>H NMR spectrum expansion (δ, acetone-d<sub>6</sub>, 600 MHz) of 3'-hydroxy-2'-methylflavanone 6-*O*-β-D-(4''-*O*-methyl)-glucopyranoside (**4b**)

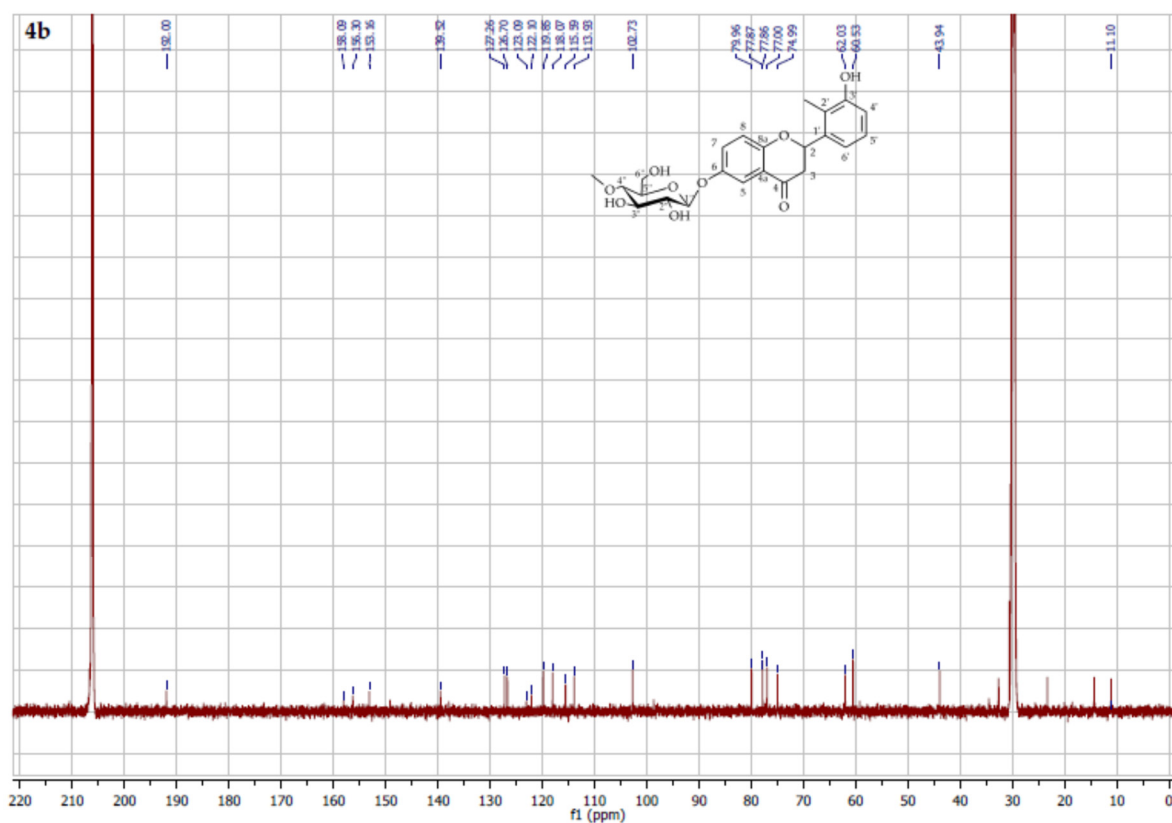

**Figure S41.**  $^{13}\text{C}$  NMR spectrum ( $\delta$ , acetone- $d_6$ , 151 MHz) of 3'-hydroxy-2'-methylflavanone 6-O- $\beta$ -D-(4''-O-methyl)-glucopyranoside (**4b**)

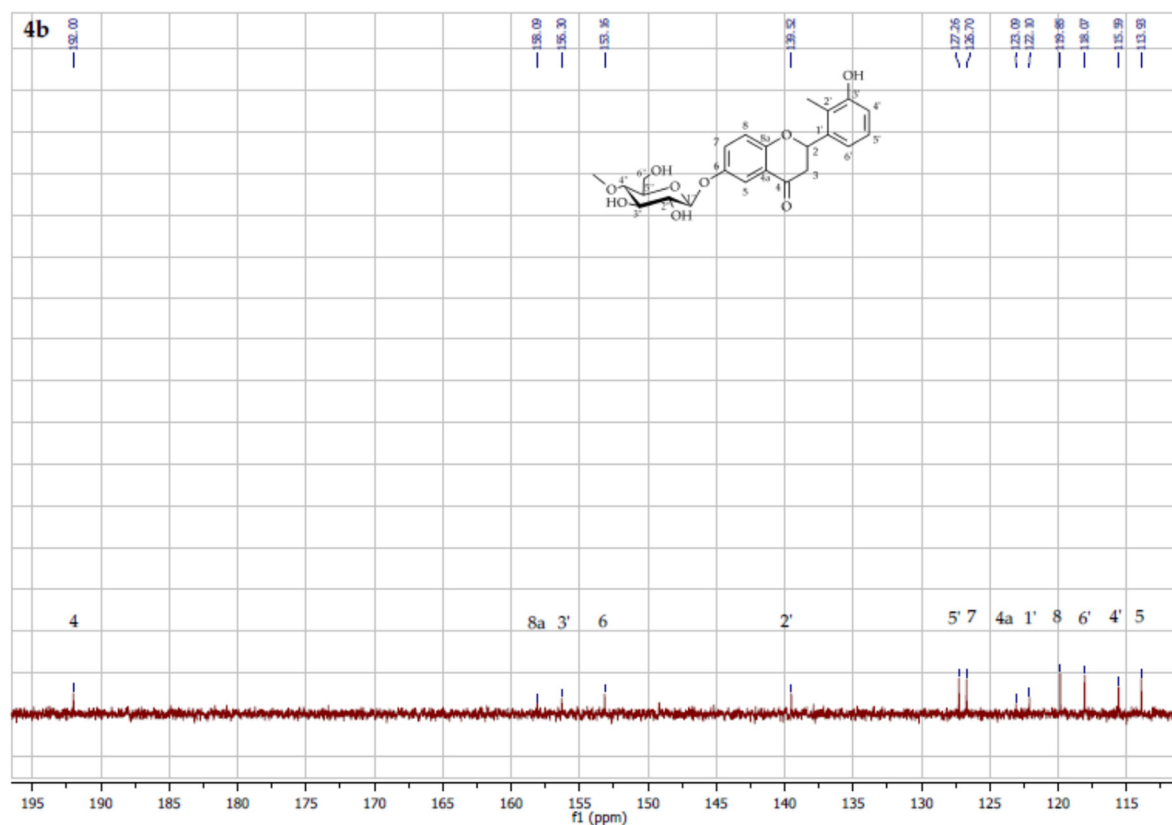

**Figure S42.**  $^{13}\text{C}$  NMR spectrum expansion ( $\delta$ , acetone- $d_6$ , 151 MHz) of 3'-hydroxy-2'-methylflavanone 6-O- $\beta$ -D-(4''-O-methyl)-glucopyranoside (**4b**)

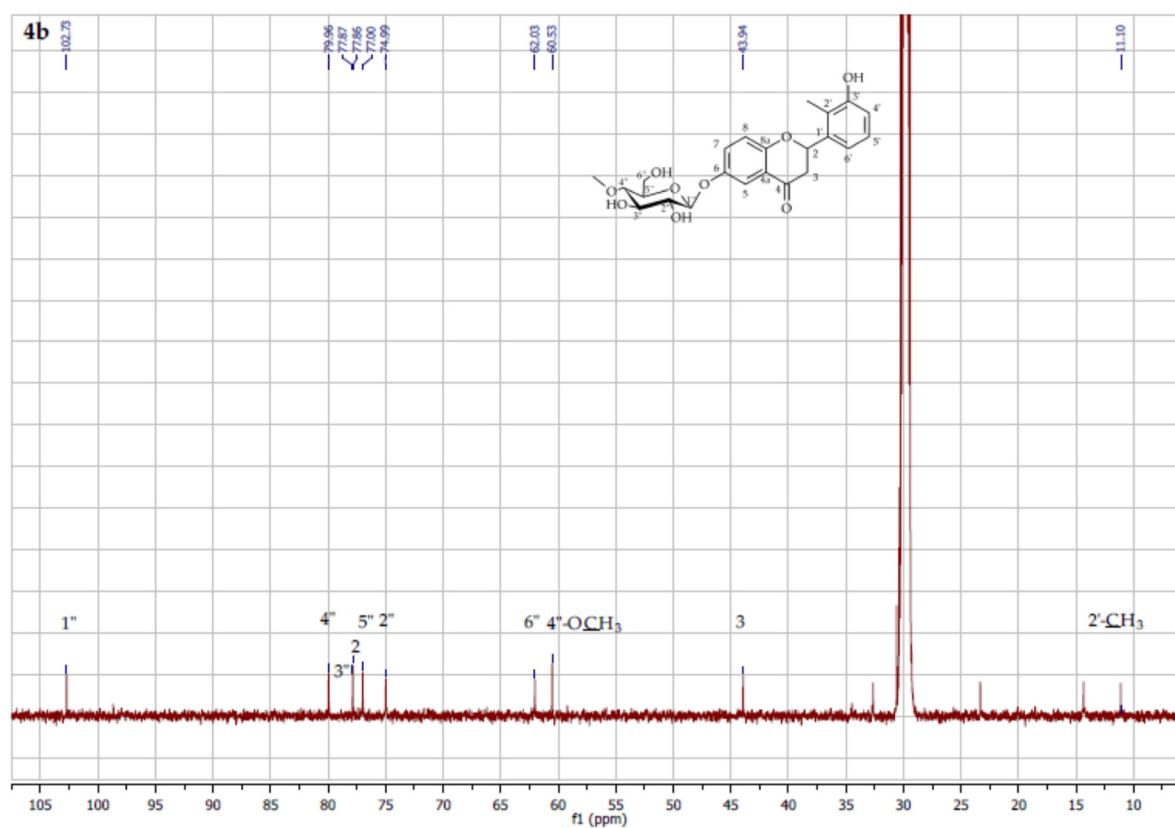

**Figure S43.**  $^{13}\text{C}$  NMR spectrum expansion ( $\delta$ , acetone- $d_6$ , 151 MHz) of 3'-hydroxy-2'-methylflavanone 6-O- $\beta$ -D-(4''-O-methyl)-glucopyranoside (**4b**)

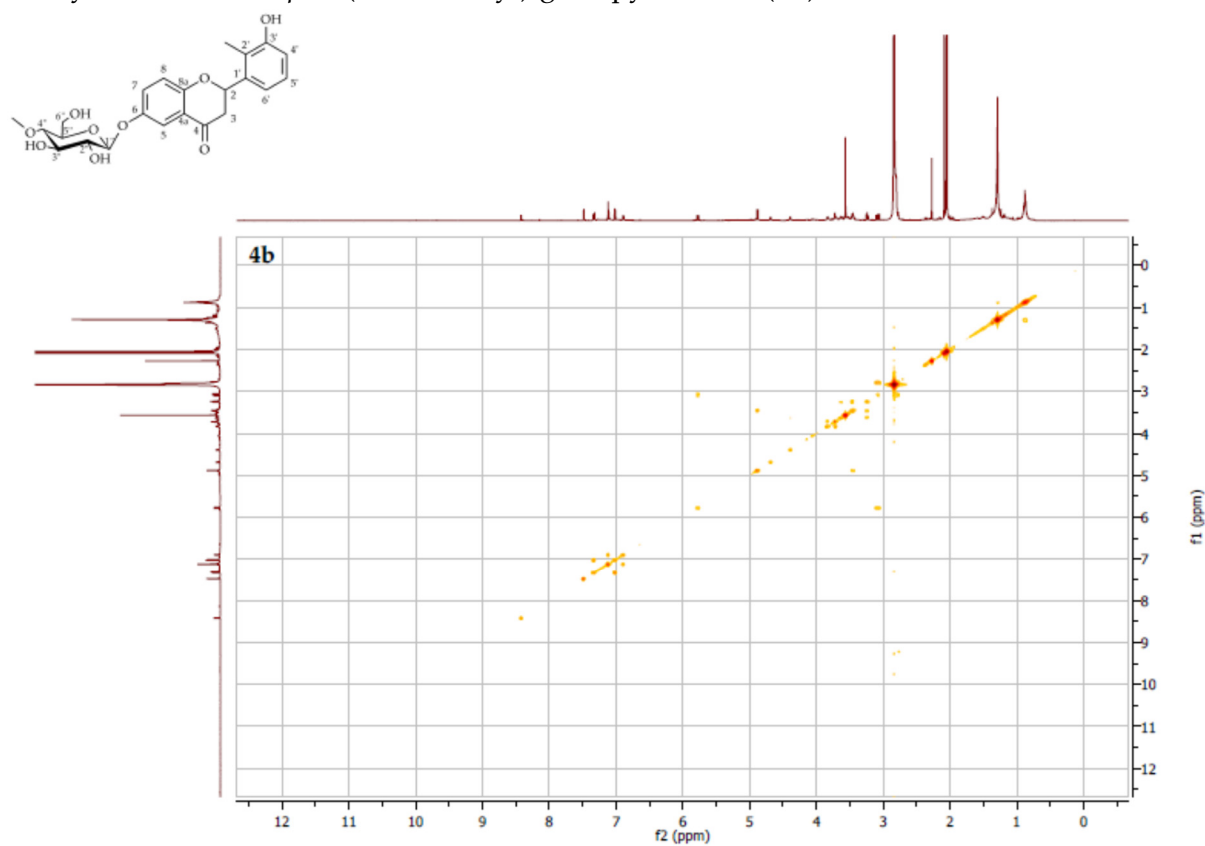

**Figure S44.** COSY contour map –  $^1\text{H} \times ^1\text{H}$  of 3'-hydroxy-2'-methylflavanone 6-O- $\beta$ -D-(4''-O-methyl)-glucopyranoside (**4b**)

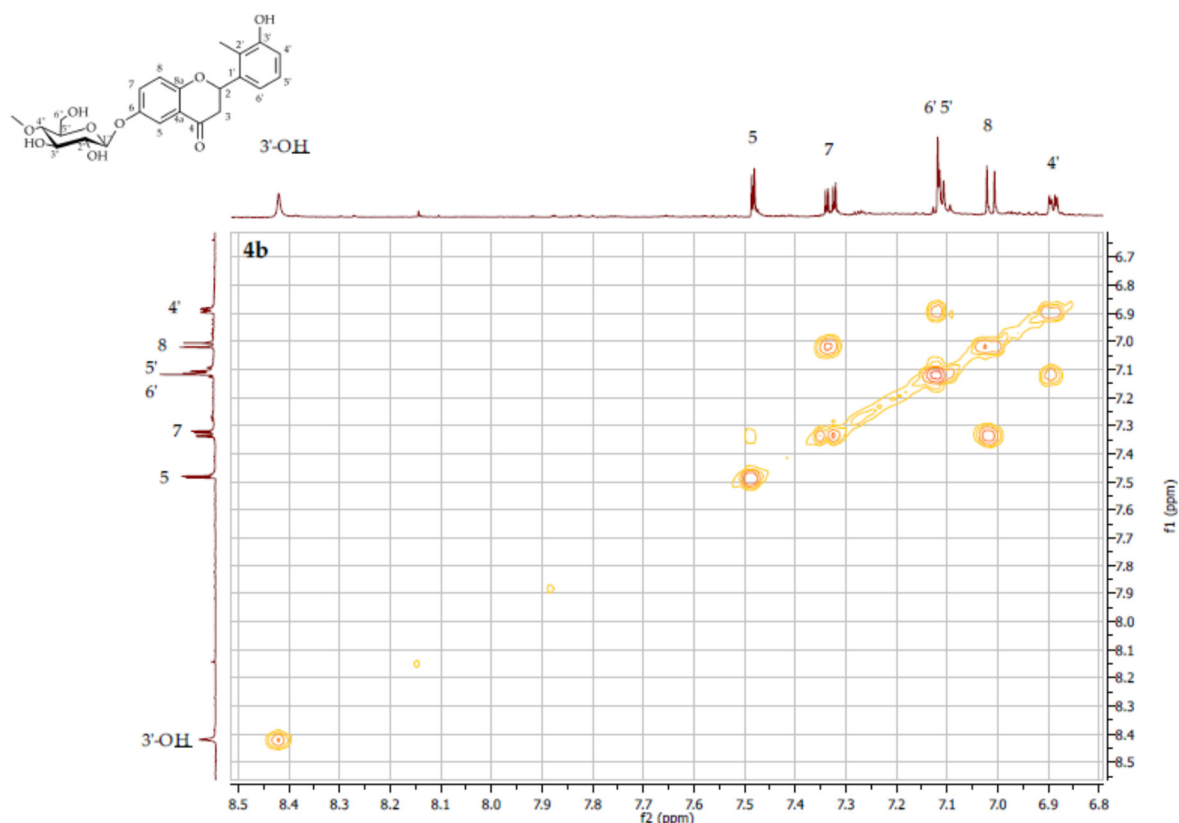

**Figure S45.** COSY contour map –  $^1\text{H} \times ^1\text{H}$  expansion of 3'-hydroxy-2'-methylflavanone 6-O- $\beta$ -D-(4''-O-methyl)-glucopyranoside (**4b**)

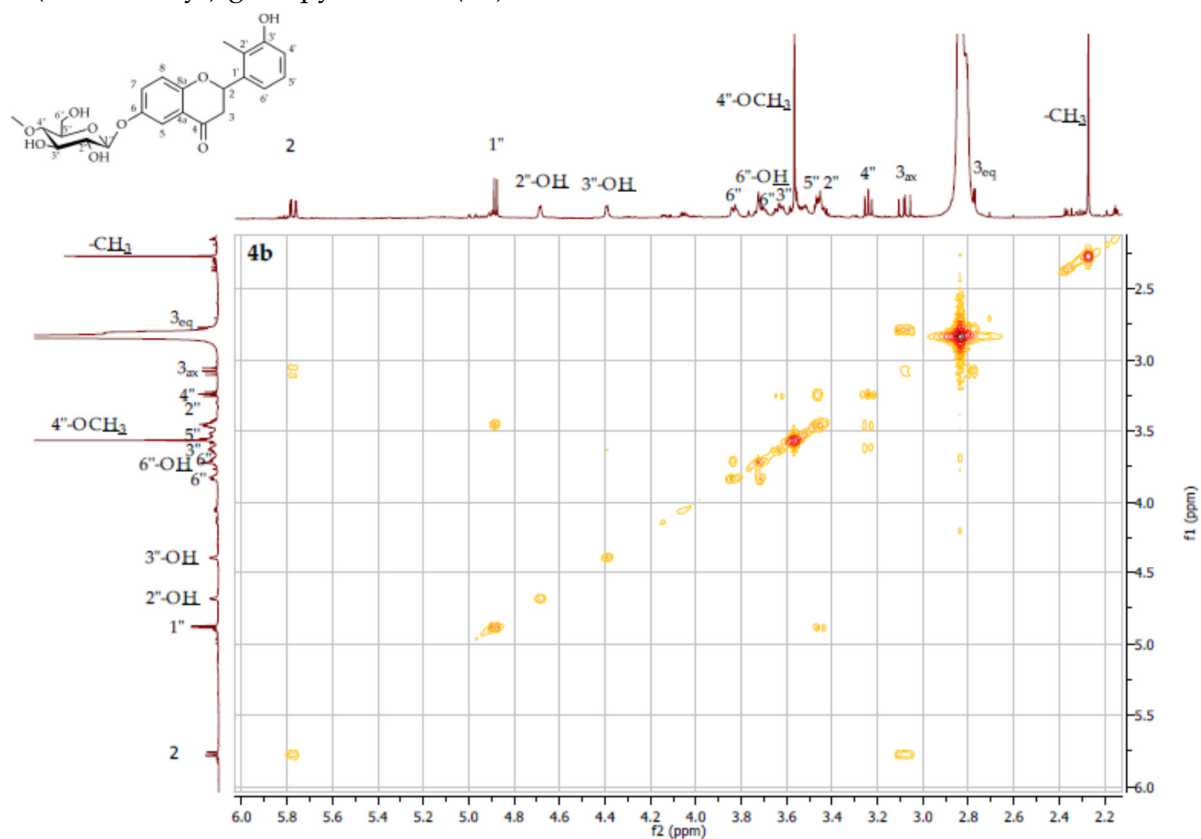

**Figure S46.** COSY contour map –  $^1\text{H} \times ^1\text{H}$  expansion of 3'-hydroxy-2'-methylflavanone 6-O- $\beta$ -D-(4''-O-methyl)-glucopyranoside (**4b**)

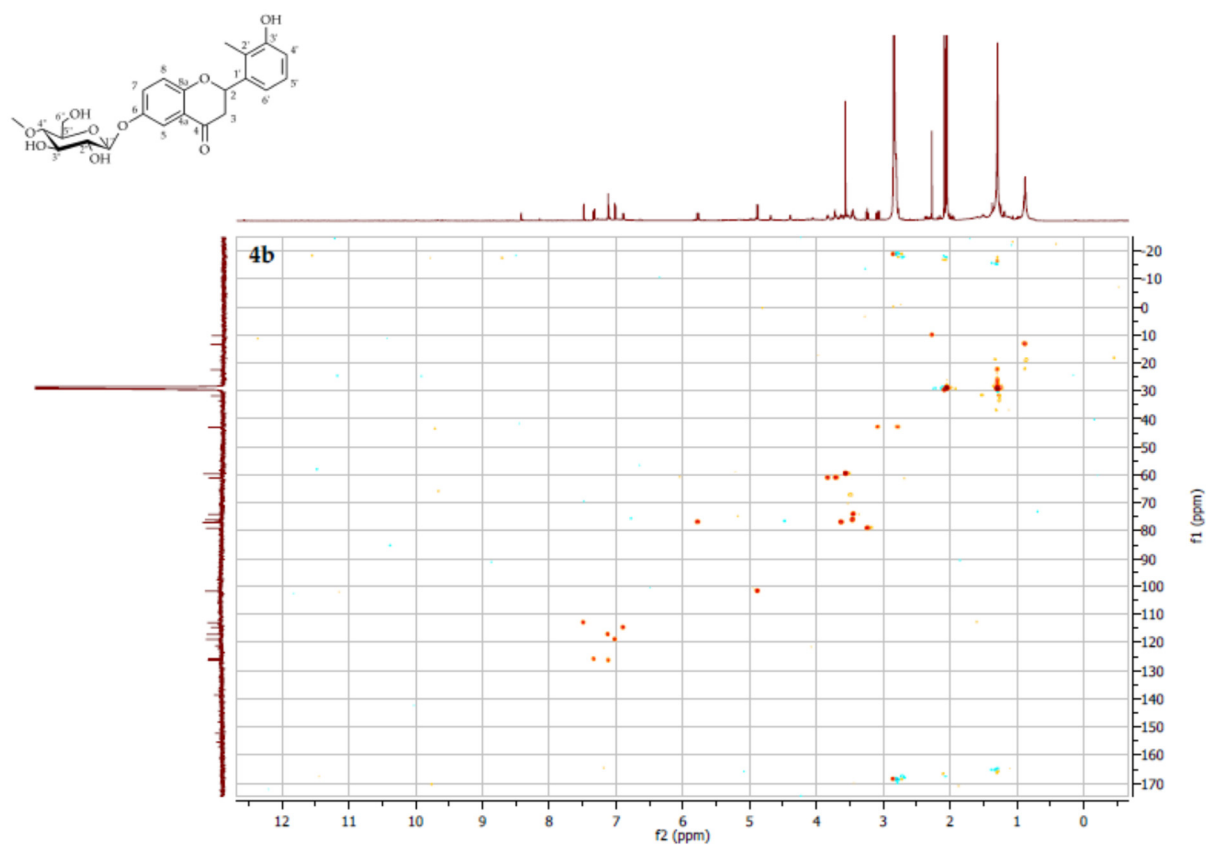

**Figure S47.** HSQC contour map –  $^1\text{H} \times ^{13}\text{C}$  of 3'-hydroxy-2'-methylflavanone 6-O- $\beta$ -D-(4''-O-methyl)-glucopyranoside (**4b**)

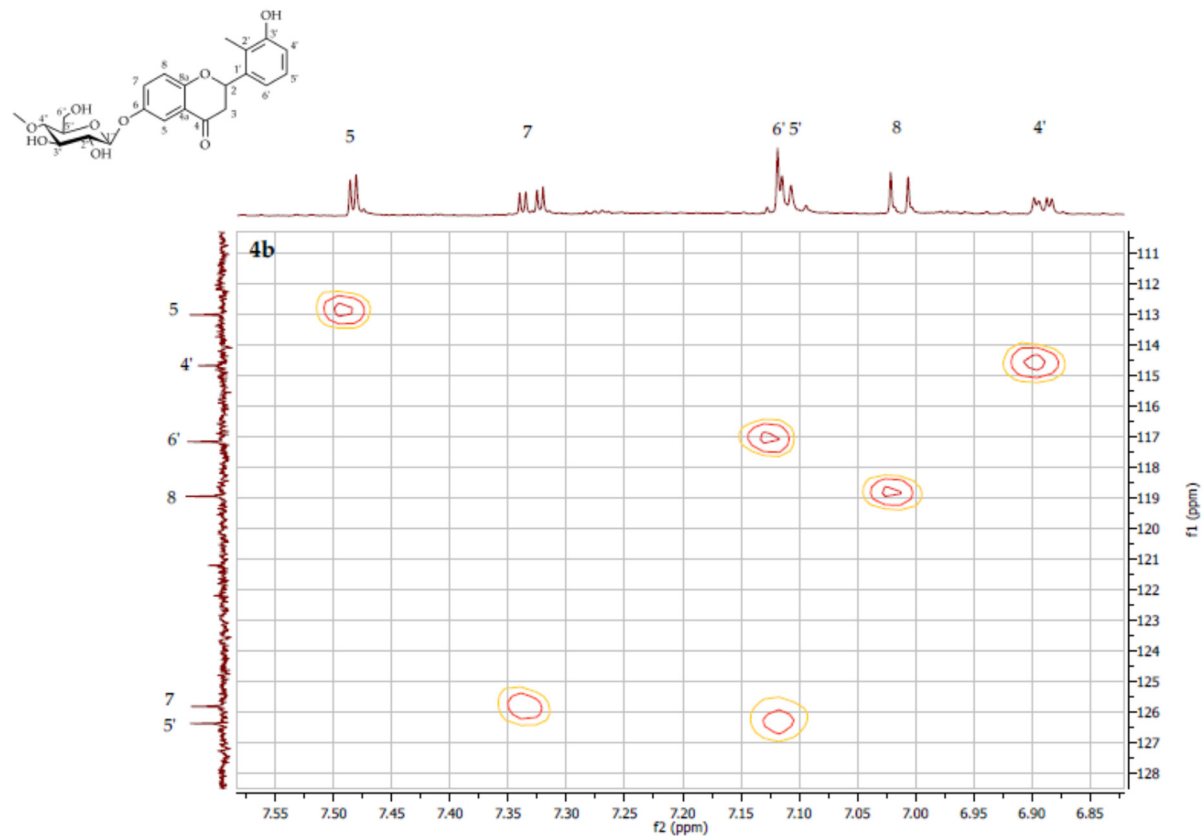

**Figure S48.** HSQC contour map –  $^1\text{H} \times ^{13}\text{C}$  expansion of 3'-hydroxy-2'-methylflavanone 6-O- $\beta$ -D-(4''-O-methyl)-glucopyranoside (**4b**)

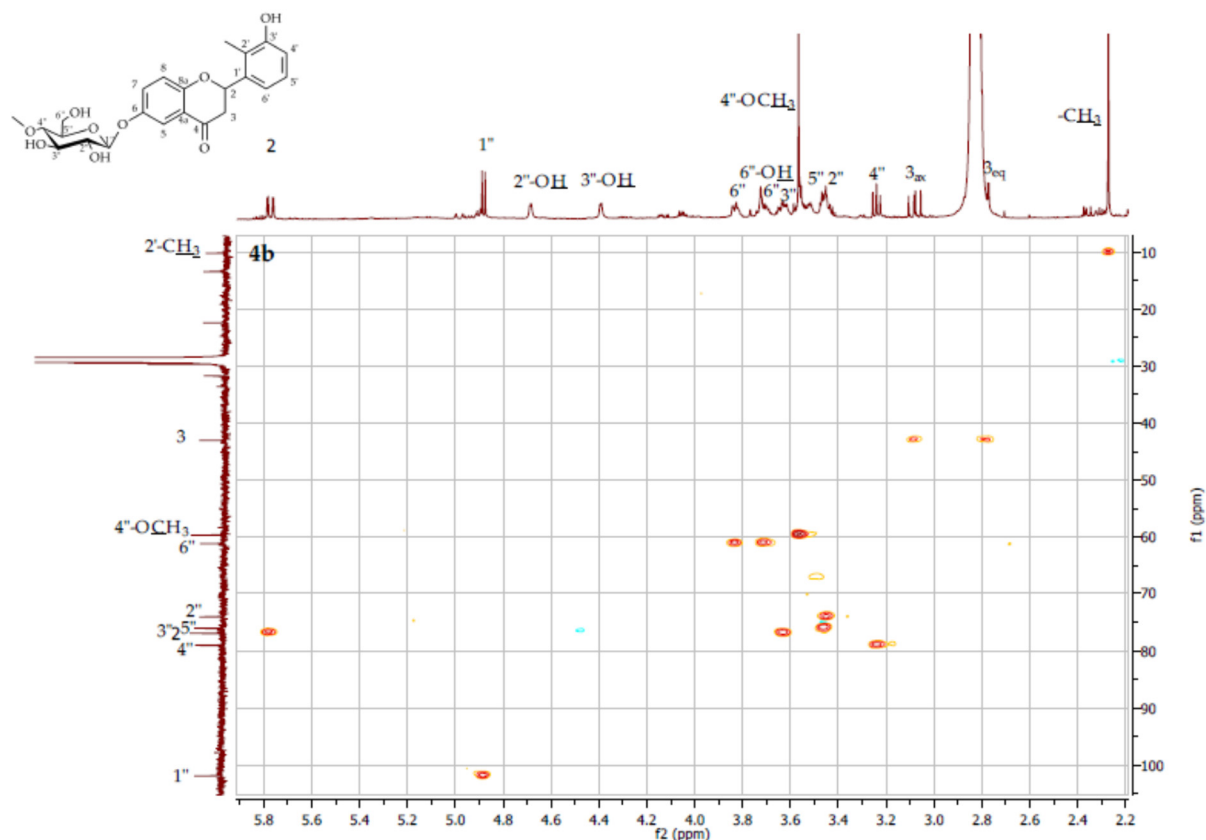

**Figure S49.** HSQC contour map –  $^1\text{H} \times ^{13}\text{C}$  expansion of 3'-hydroxy-2'-methylflavanone 6-O- $\beta$ -D-(4''-O-methyl)-glucopyranoside (**4b**)

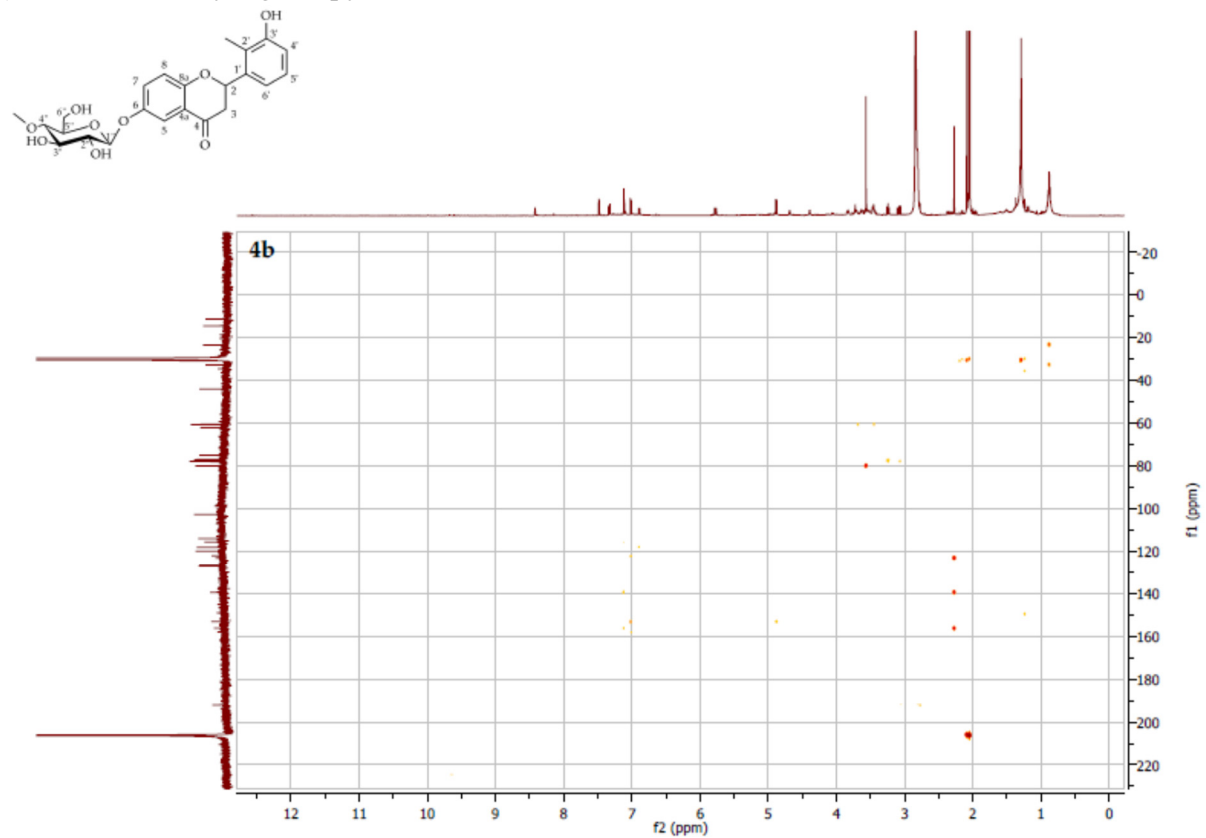

**Figure S50.** HMBC contour map –  $^1\text{H} \times ^{13}\text{C}$  3'-hydroxy-2'-methylflavanone 6-O- $\beta$ -D-(4''-O-methyl)-glucopyranoside (**4b**)



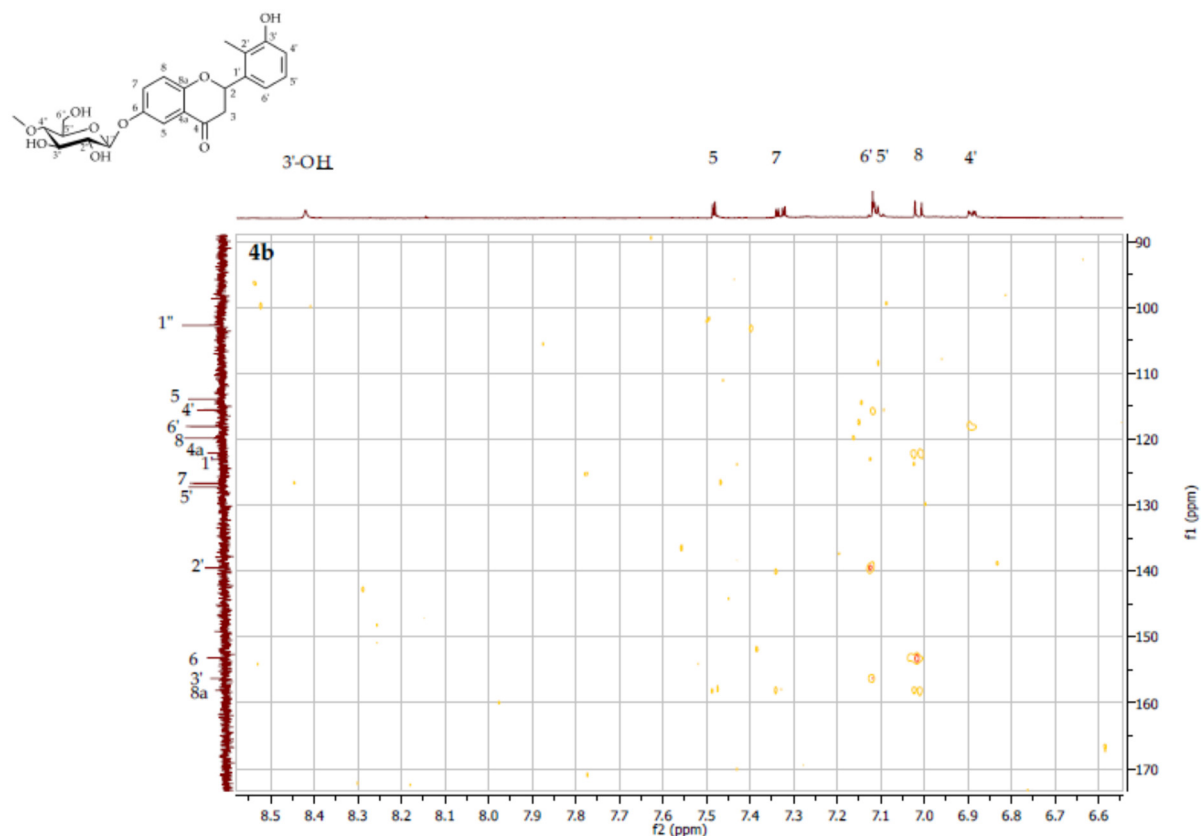

**Figure S51.** HMBC contour map –  $^1\text{H} \times ^{13}\text{C}$  expansion of 3'-hydroxy-2'-methylflavanone 6-O- $\beta$ -D-(4''-O-methyl)-glucopyranoside (**4b**)

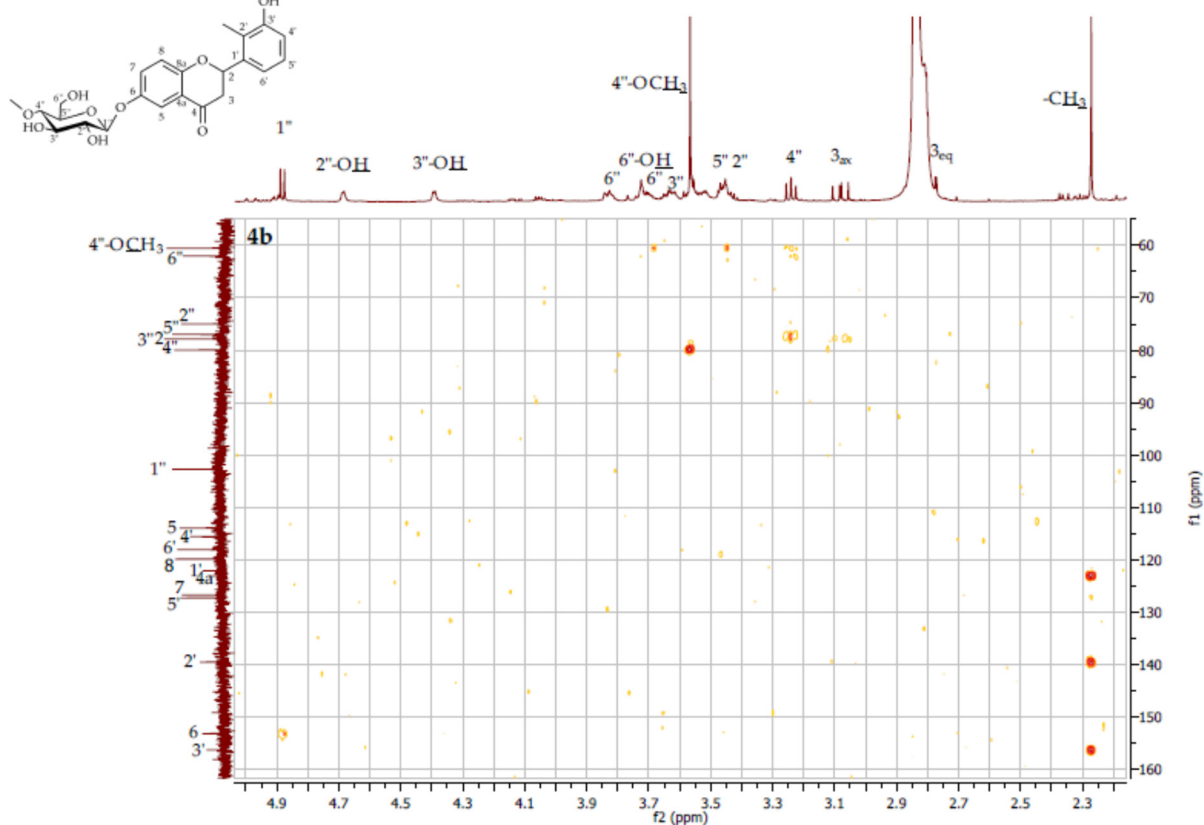

**Figure S52.** HMBC contour map –  $^1\text{H} \times ^{13}\text{C}$  expansion of 3'-hydroxy-2'-methylflavanone 6-O- $\beta$ -D-(4''-O-methyl)-glucopyranoside (**4b**)



Molecular formula: C<sub>23</sub>H<sub>28</sub>O<sub>7</sub>

Formula weight: 416.18

Ionization mode: negative

Precursor: adduct [M + 46 - H]<sup>-</sup> ([M + HCOOH - H]<sup>-</sup>) 461.20

461.2000>45.0500 CE: 12.0

461.2000>309.1500 CE: 23.0

461.2000>325.1500 CE: 22.0

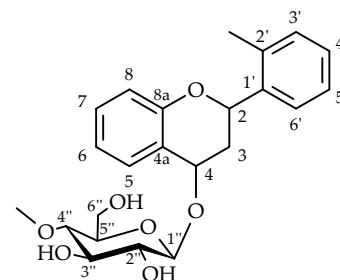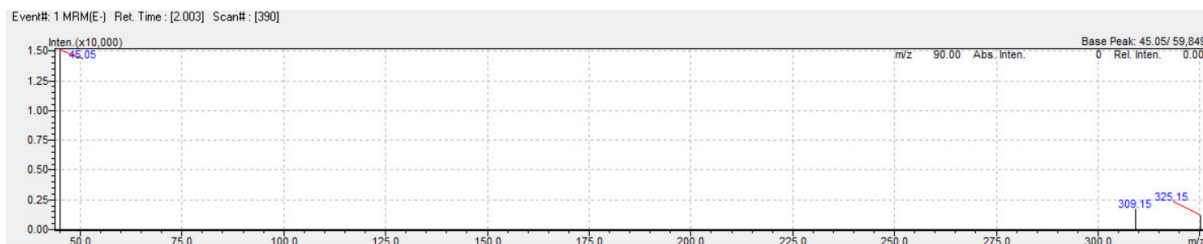

**Figure S53.** MS analysis of 2-(2'-methylphenyl)-chromane 4-O- $\beta$ -D-(4''-O-methyl)-glucopyranoside (**4c**)

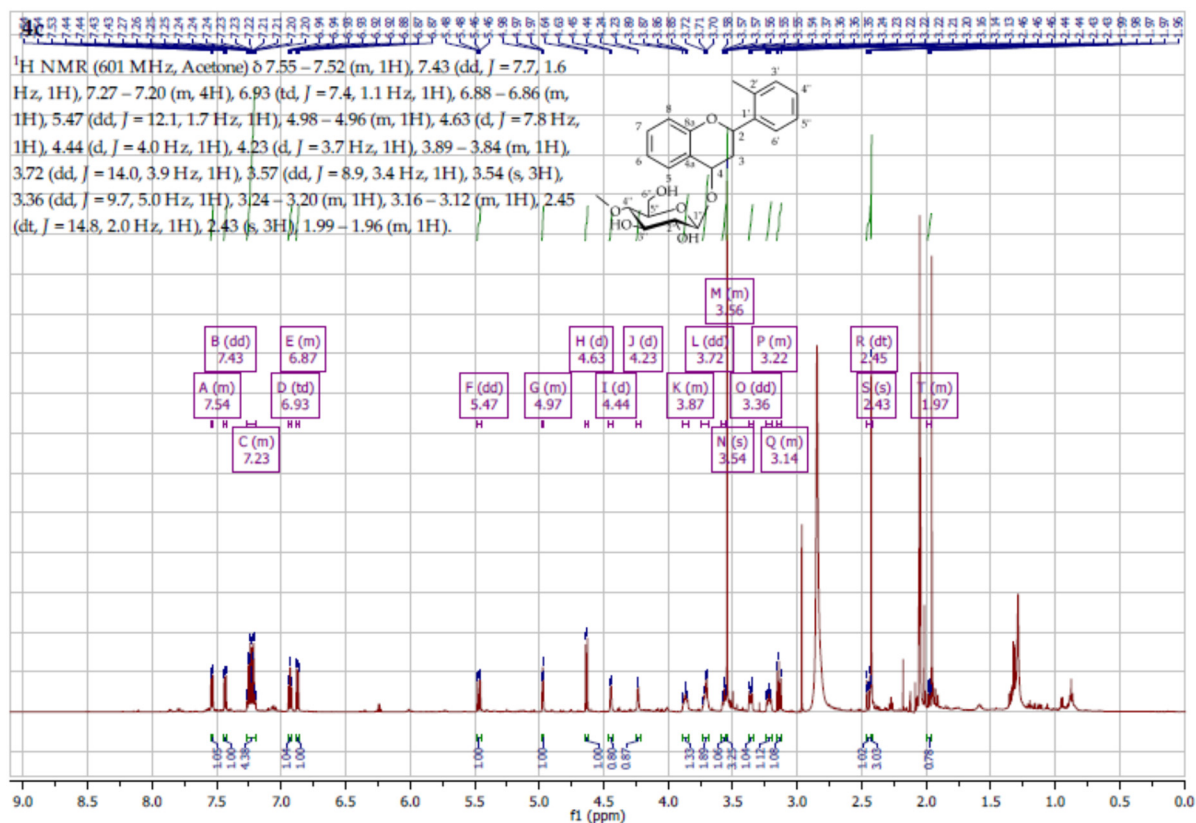

**Figure S54.** <sup>1</sup>H NMR spectrum ( $\delta$ , acetone-d<sub>6</sub>, 600 MHz) of 2-(2'-methylphenyl)-chromane 4-O- $\beta$ -D-(4''-O-methyl)-glucopyranoside (**4c**)

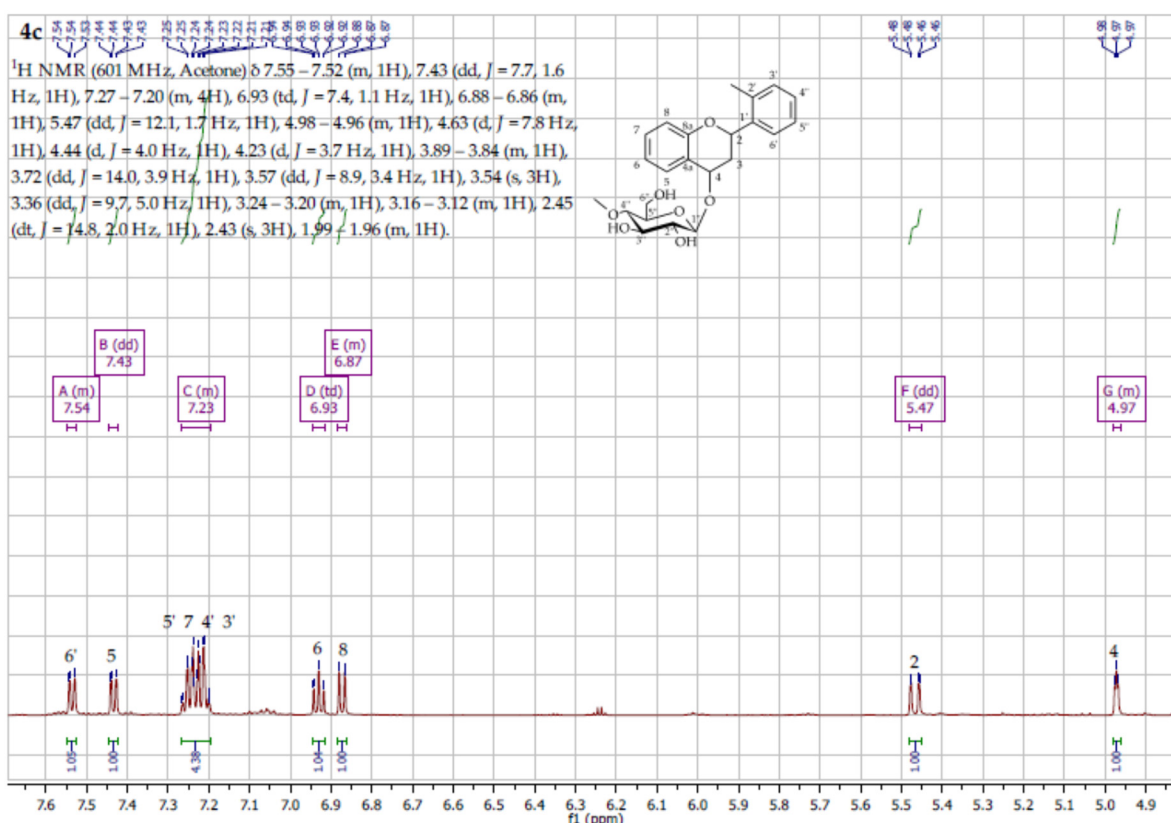

**Figure S55.** <sup>1</sup>H NMR spectrum expansion (δ, acetone-d<sub>6</sub>, 600 MHz) of 2-(2'-methylphenyl)-chromane 4-*O*-β-D-(4''-*O*-methyl)-glucopyranoside (**4c**)

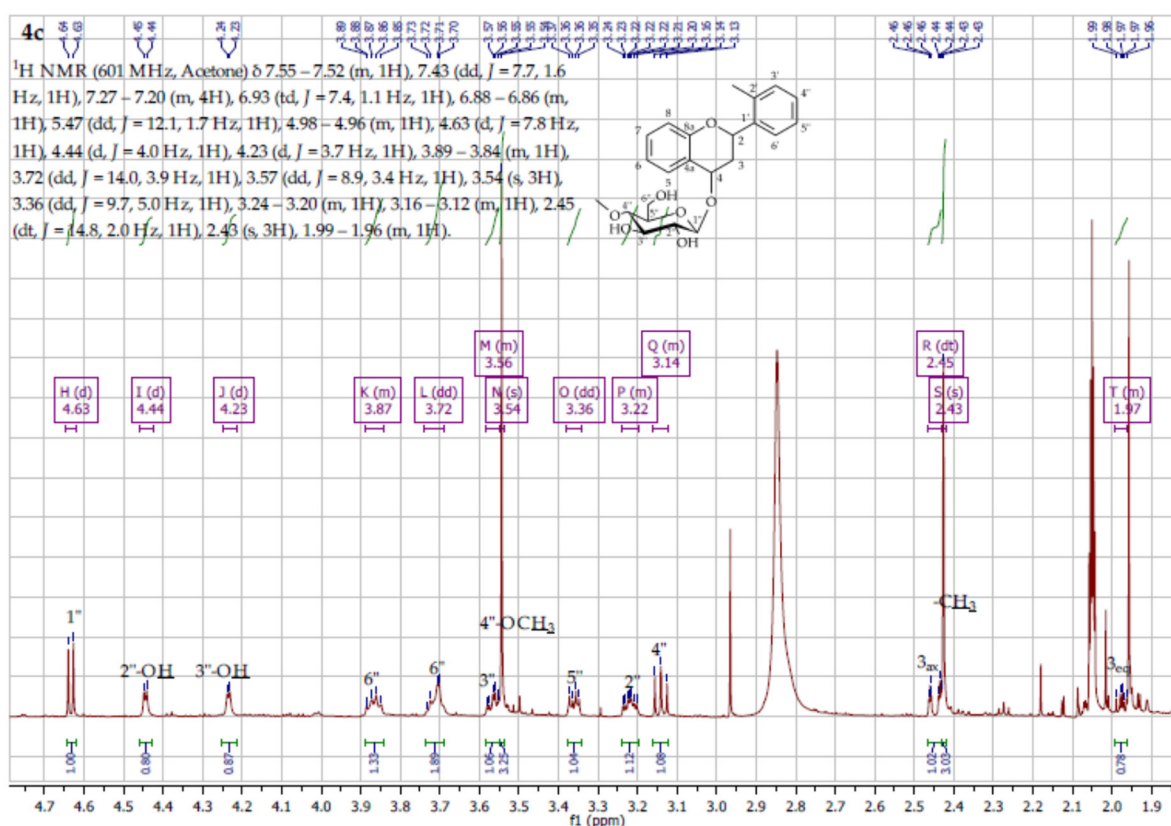

**Figure S56.** <sup>1</sup>H NMR spectrum expansion (δ, acetone-d<sub>6</sub>, 600 MHz) of 2-(2'-methylphenyl)-chromane 4-*O*-β-D-(4''-*O*-methyl)-glucopyranoside (**4c**)

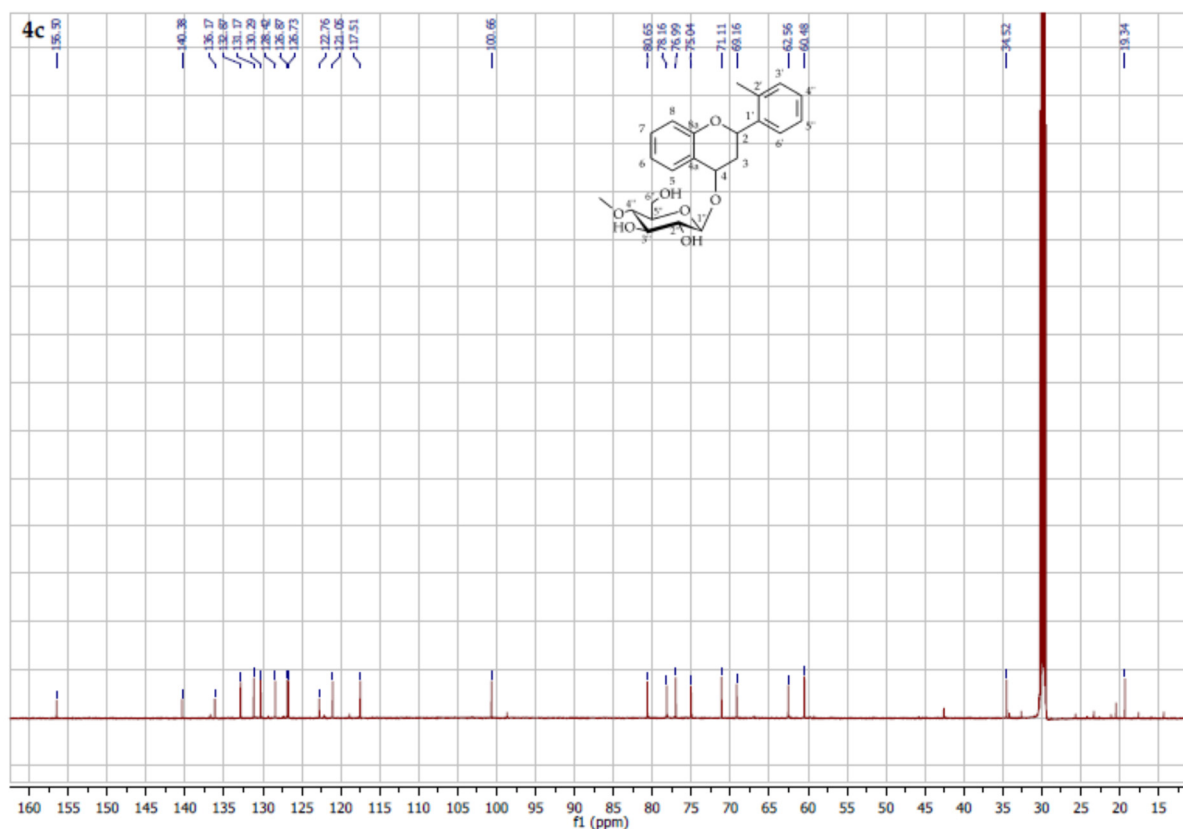

**Figure S57.**  $^{13}\text{C}$  NMR spectrum ( $\delta$ , acetone- $d_6$ , 151 MHz) of 2-(2'-methylphenyl)-chromane 4- $O$ - $\beta$ -D-(4''- $O$ -methyl)-glucopyranoside (**4c**)

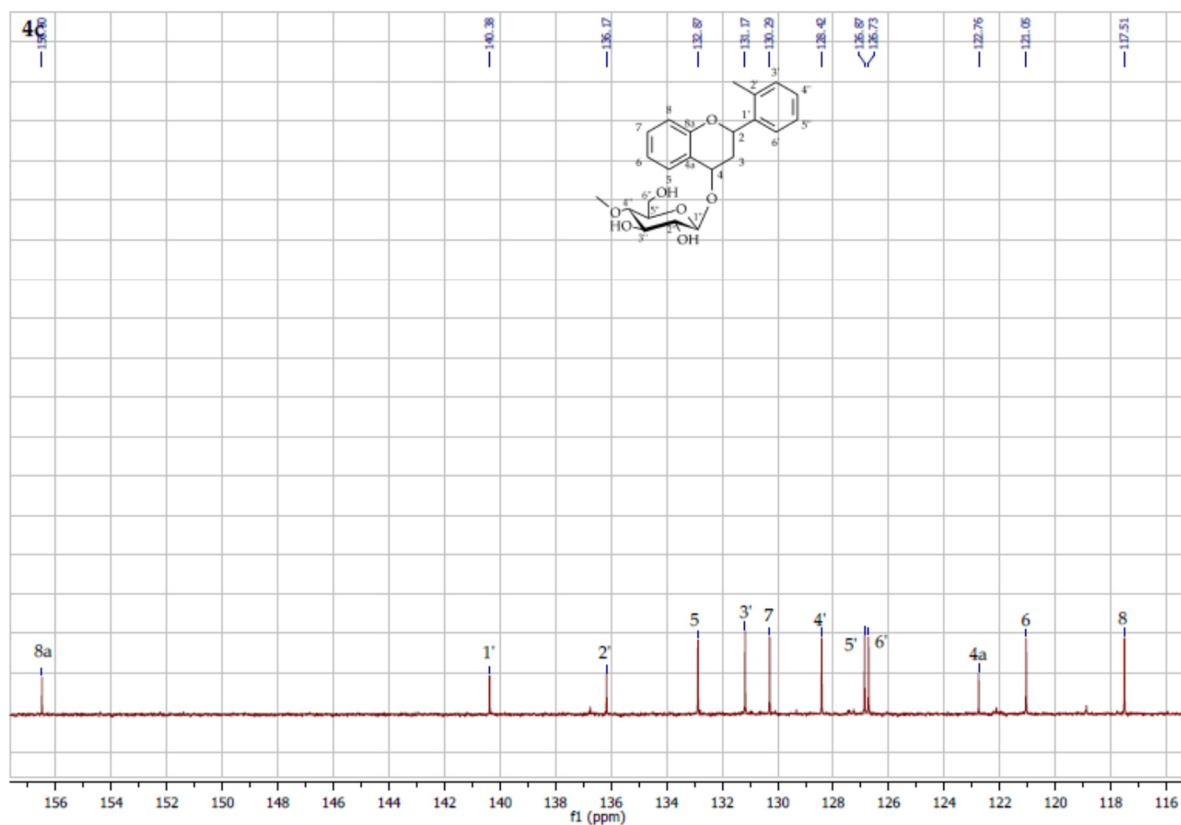

**Figure S58.**  $^{13}\text{C}$  NMR spectrum expansion ( $\delta$ , acetone- $d_6$ , 151 MHz) of 2-(2'-methylphenyl)-chromane 4- $O$ - $\beta$ -D-(4''- $O$ -methyl)-glucopyranoside (**4c**)

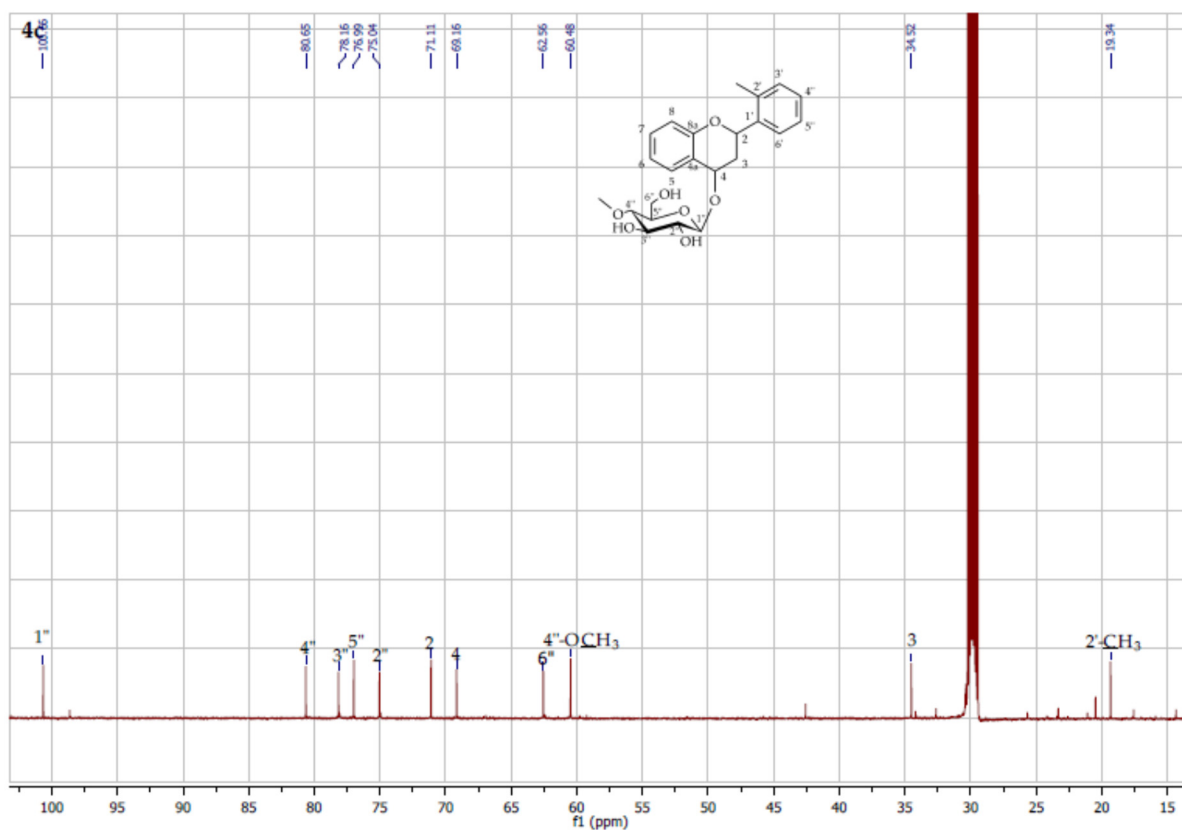

**Figure S59.**  $^{13}\text{C}$  NMR spectrum expansion ( $\delta$ , acetone- $d_6$ , 151 MHz) of 2-(2'-methylphenyl)-chromane 4- $O$ - $\beta$ -D-(4''- $O$ -methyl)-glucopyranoside (**4c**)

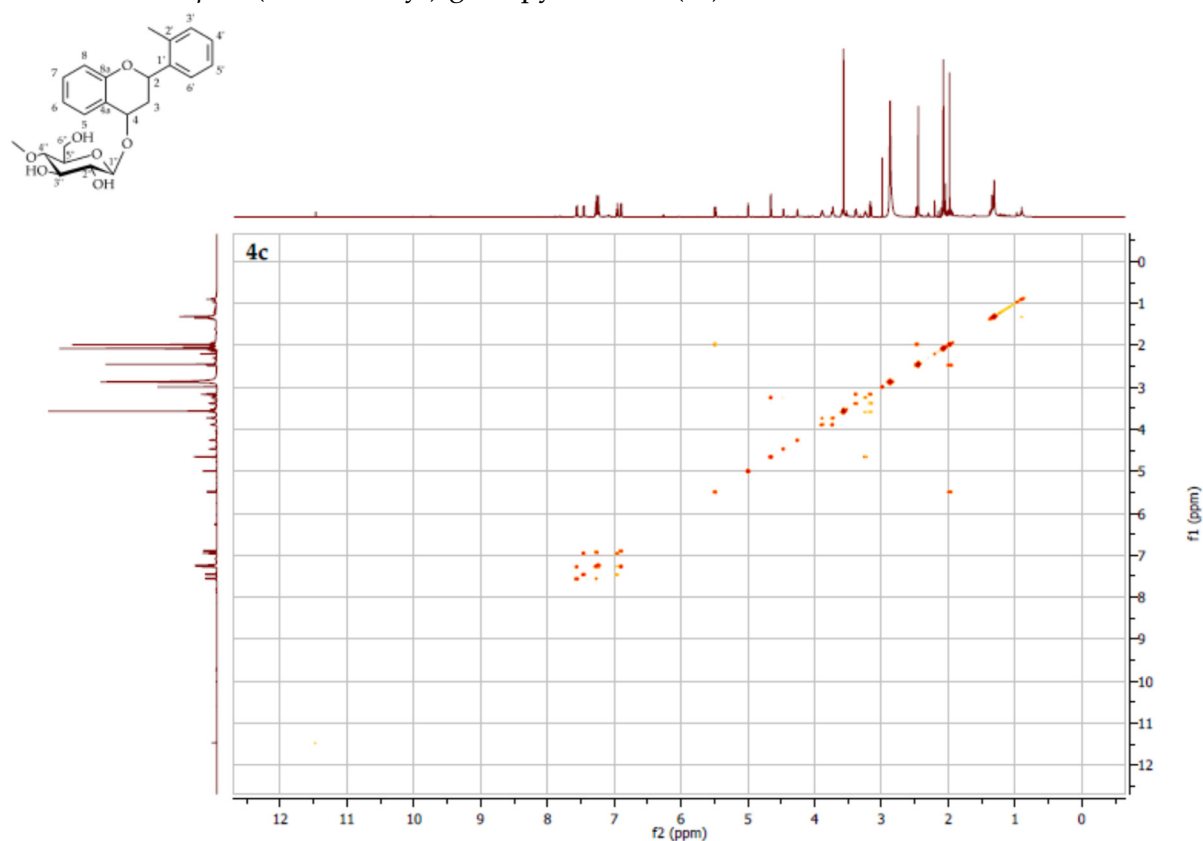

**Figure S60.** COSY contour map –  $^1\text{H} \times ^1\text{H}$  of 2-(2'-methylphenyl)-chromane 4- $O$ - $\beta$ -D-(4''- $O$ -methyl)-glucopyranoside (**4c**)

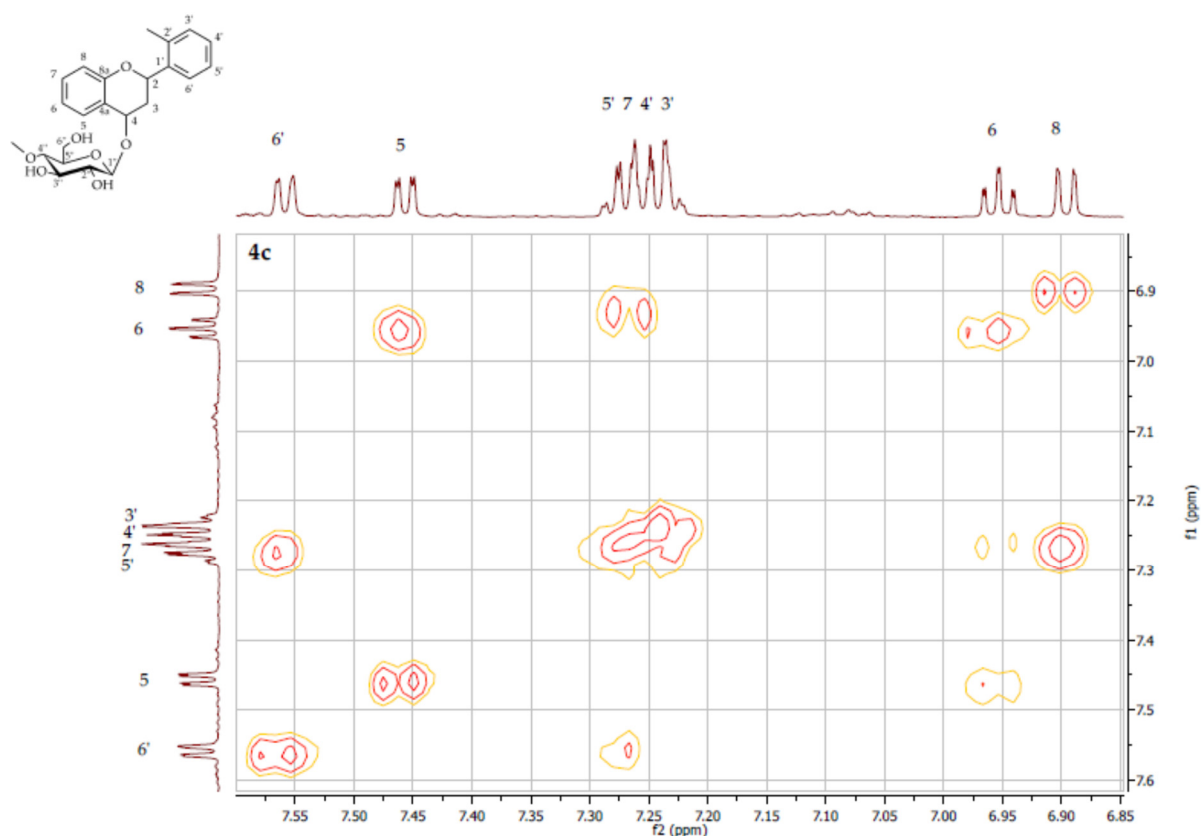

**Figure S61.** COSY contour map – <sup>1</sup>H x <sup>1</sup>H expansion of of 2-(2'-methylphenyl)-chromane 4-O-β-D-(4''-O-methyl)-glucopyranoside (**4c**)

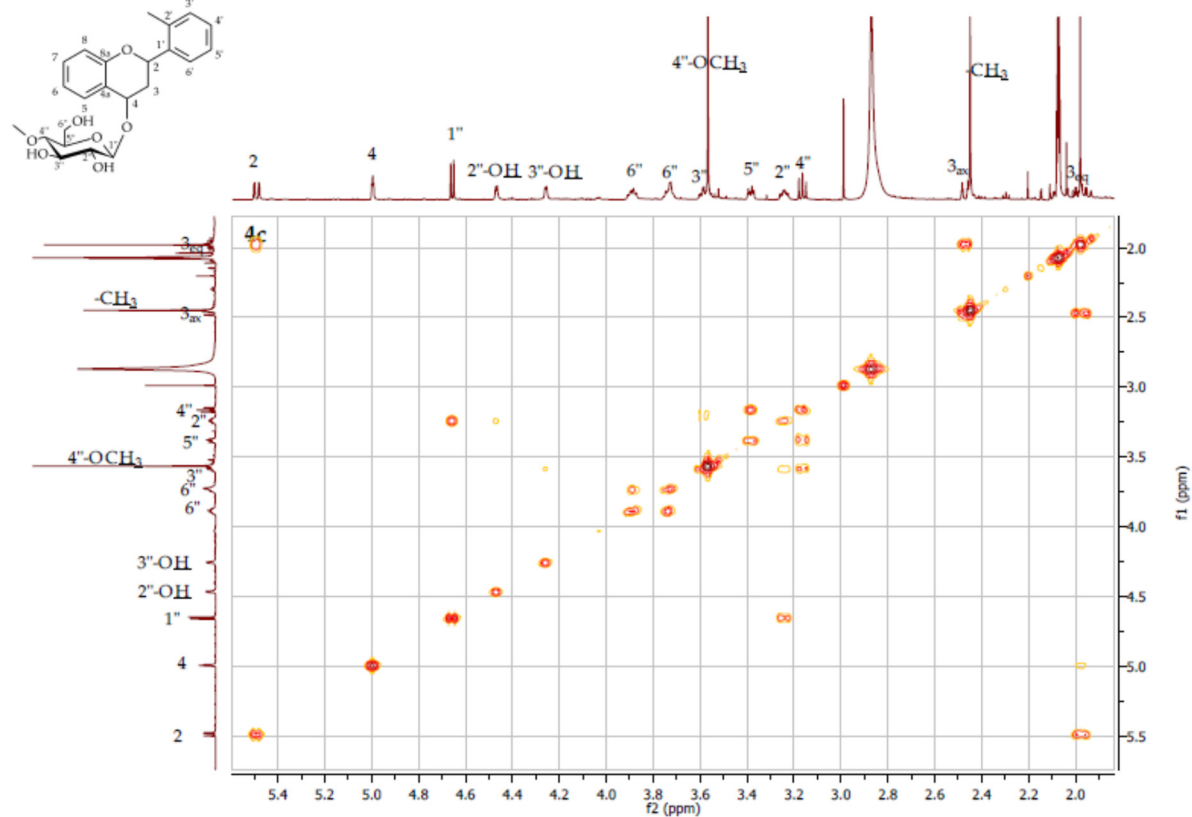

**Figure S62.** COSY contour map – <sup>1</sup>H x <sup>1</sup>H expansion of of 2-(2'-methylphenyl)-chromane 4-O-β-D-(4''-O-methyl)-glucopyranoside (**4c**)

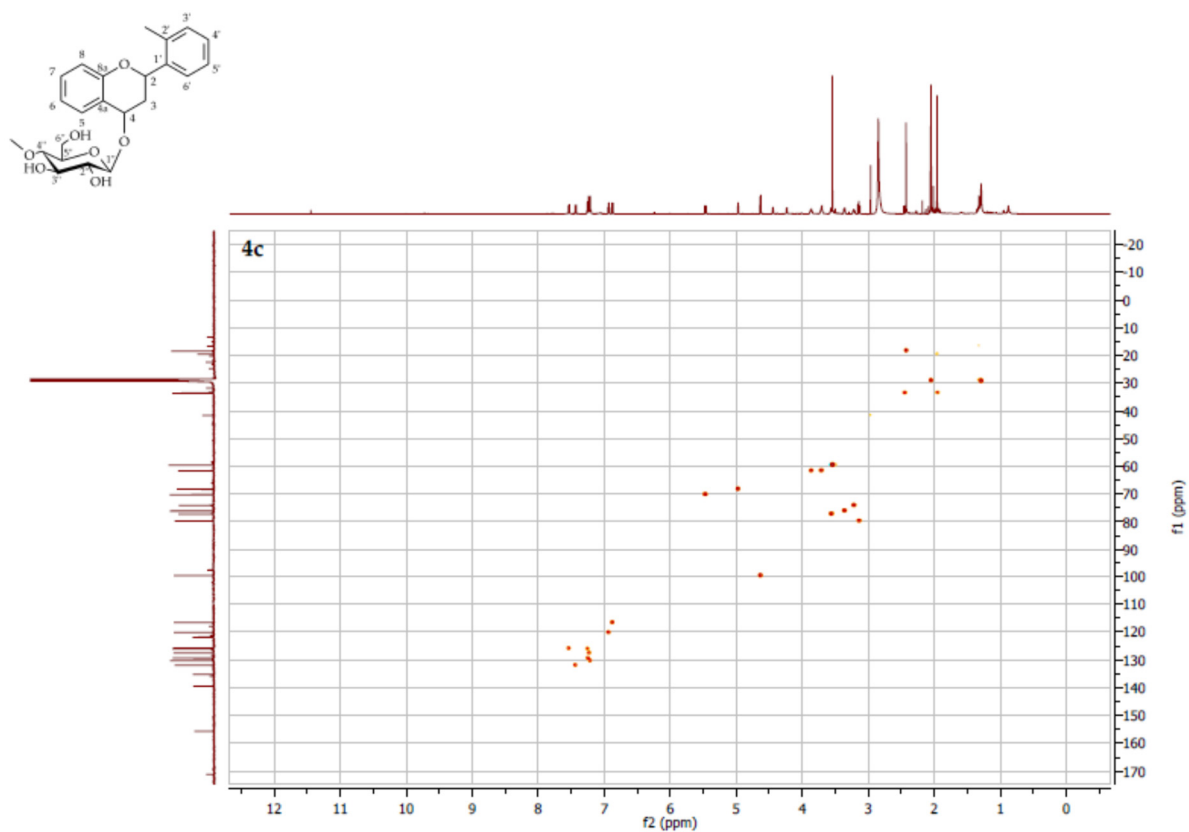

**Figure S63.** HSQC contour map –  $^1\text{H} \times ^{13}\text{C}$  of 2-(2'-methylphenyl)-chromane 4-O- $\beta$ -D-(4''-O-methyl)-glucopyranoside (**4c**)

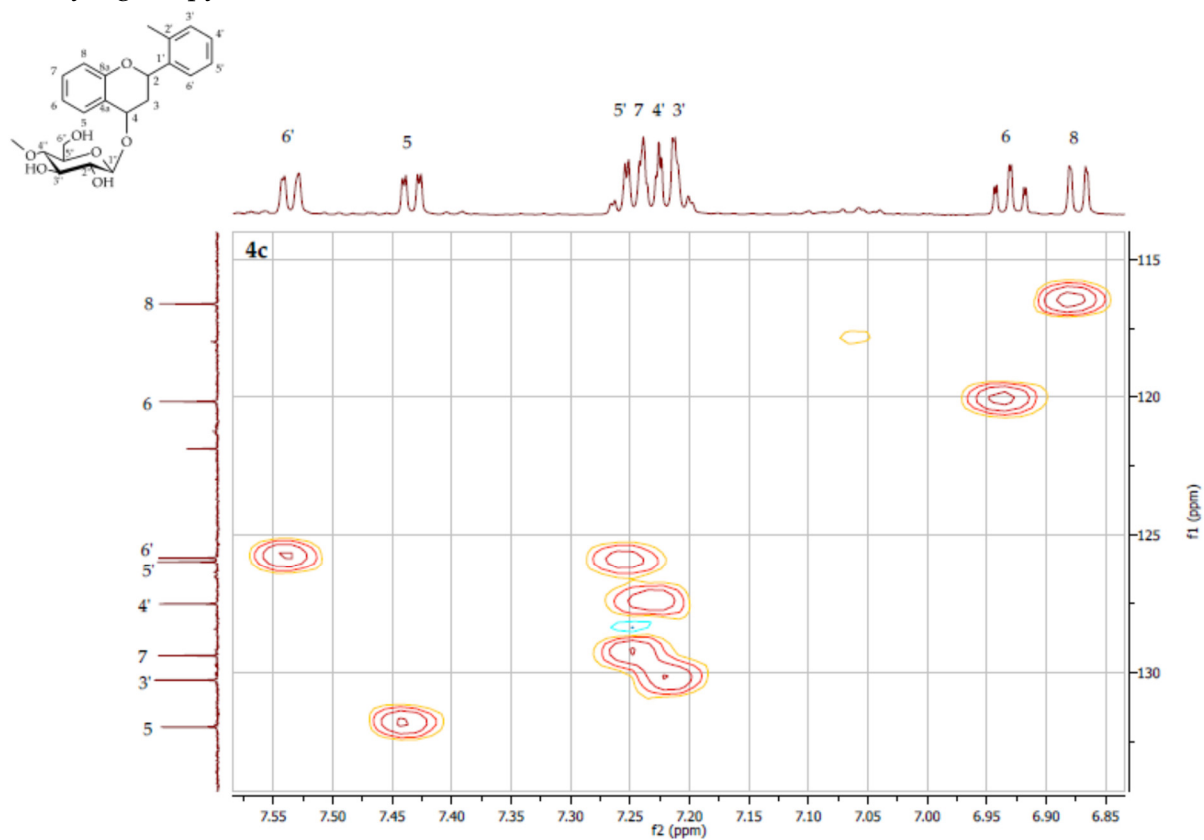

**Figure S64.** HSQC contour map –  $^1\text{H} \times ^{13}\text{C}$  expansion of 2-(2'-methylphenyl)-chromane 4-O- $\beta$ -D-(4''-O-methyl)-glucopyranoside (**4c**)

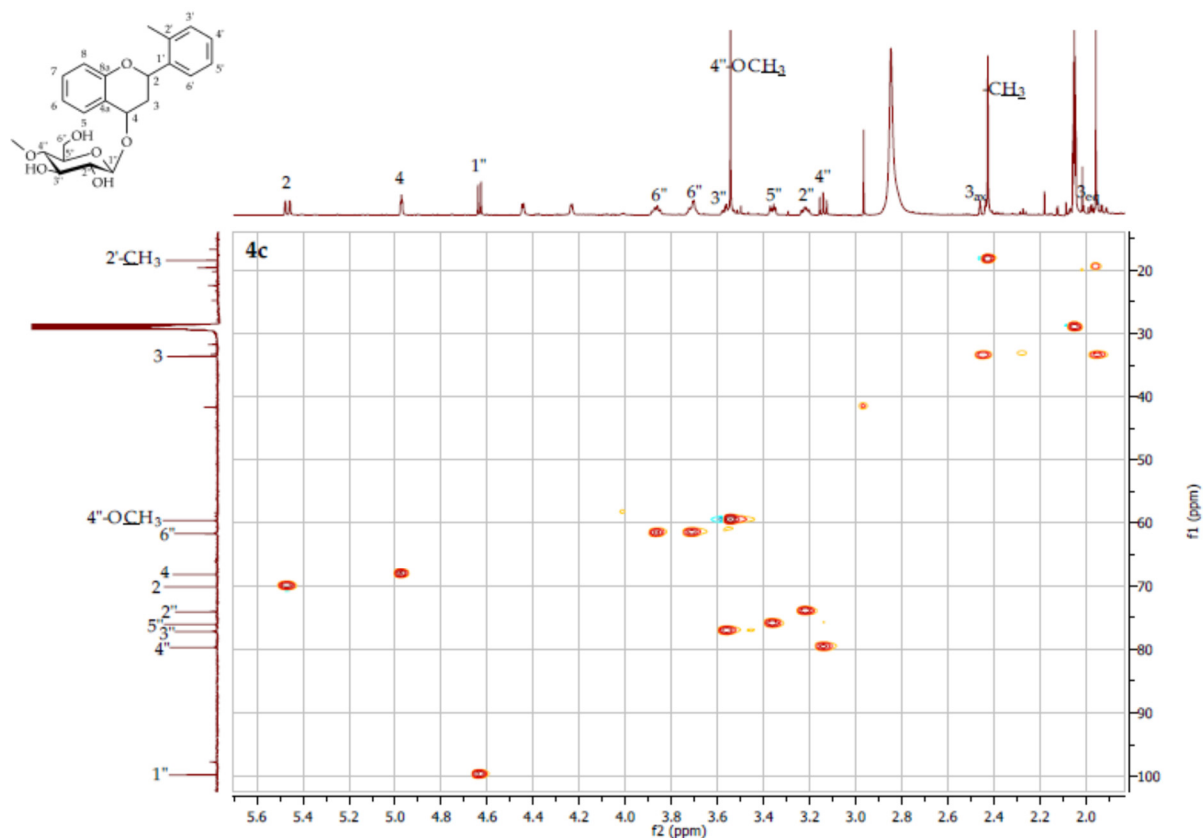

**Figure S65.** HSQC contour map –  $^1\text{H} \times ^{13}\text{C}$  expansion of 2-(2'-methylphenyl)-chromane 4-O- $\beta$ -D-(4''-O-methyl)-glucopyranoside (**4c**)

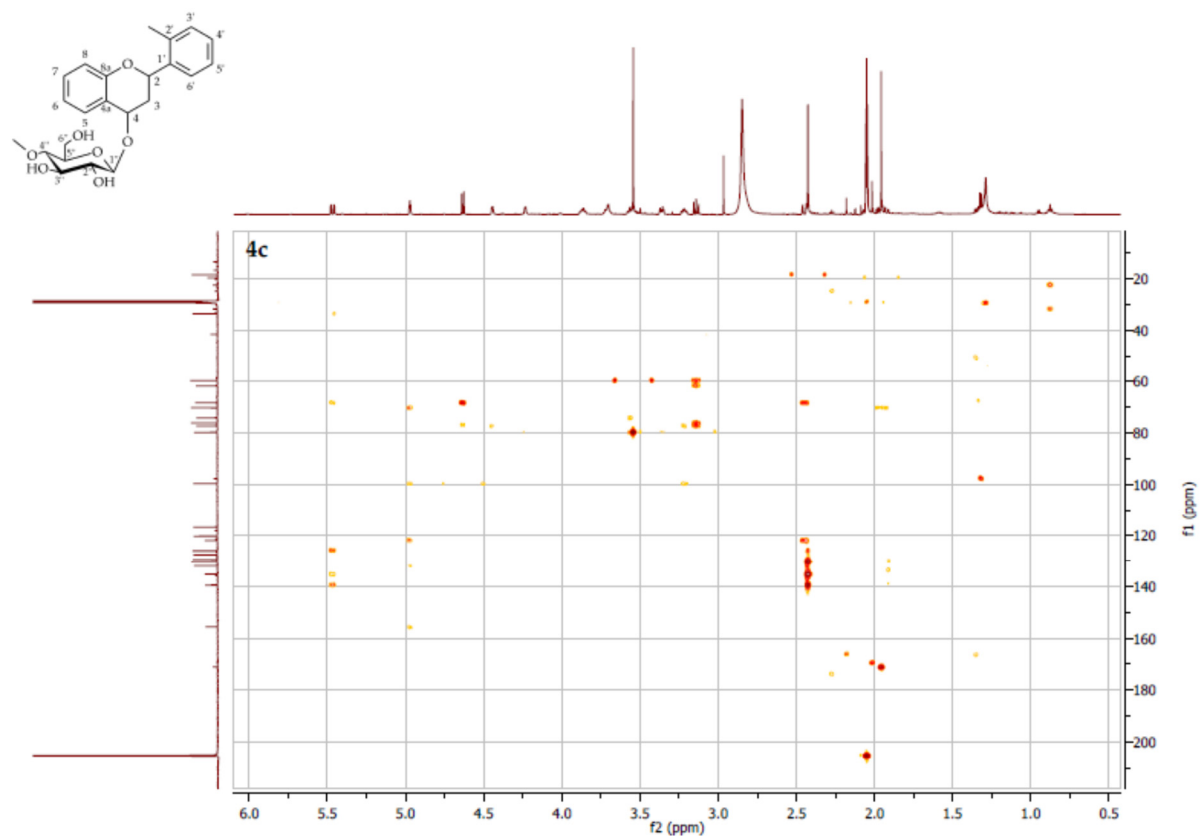

**Figure S66.** HMBC contour map –  $^1\text{H} \times ^{13}\text{C}$  of 2-(2'-methylphenyl)-chromane 4-O- $\beta$ -D-(4''-O-methyl)-glucopyranoside (**4c**)



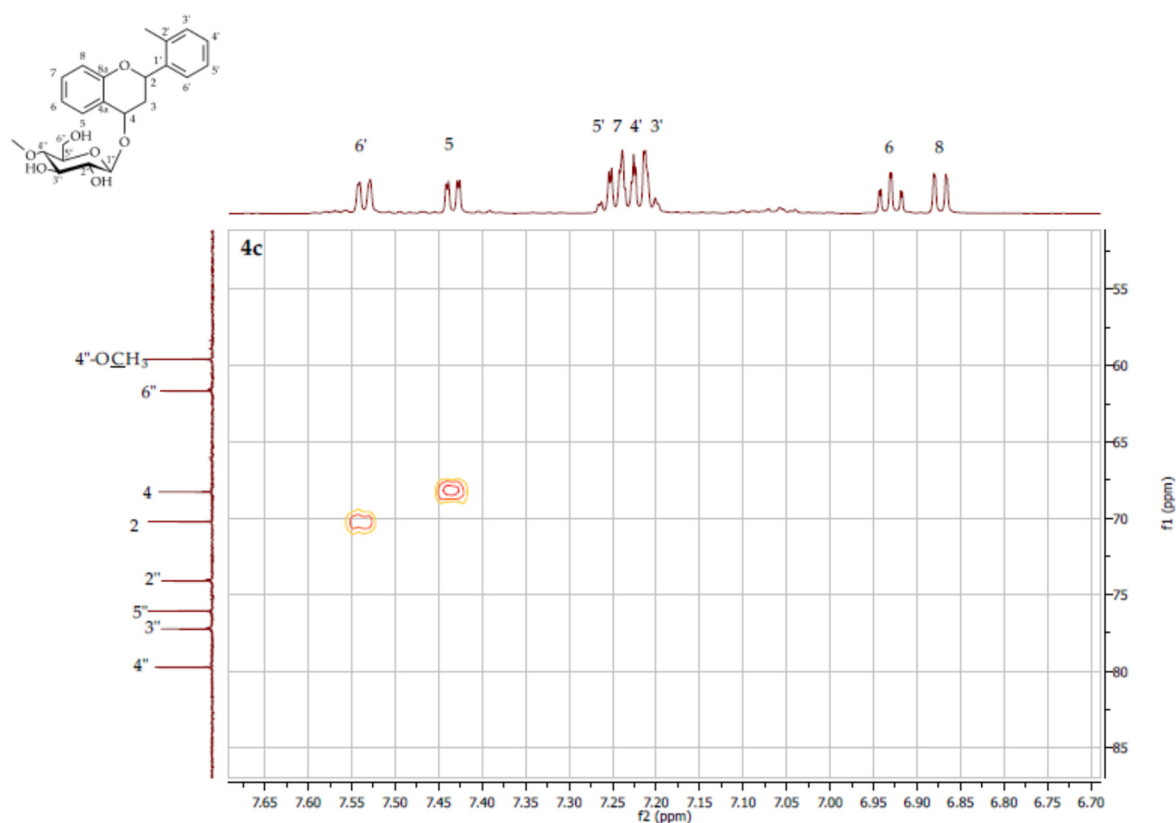

**Figure S67.** HMBC contour map –  $^1\text{H} \times ^{13}\text{C}$  expansion of 2-(2'-methylphenyl)-chromane 4-O- $\beta$ -D-(4''-O-methyl)-glucopyranoside (**4c**)

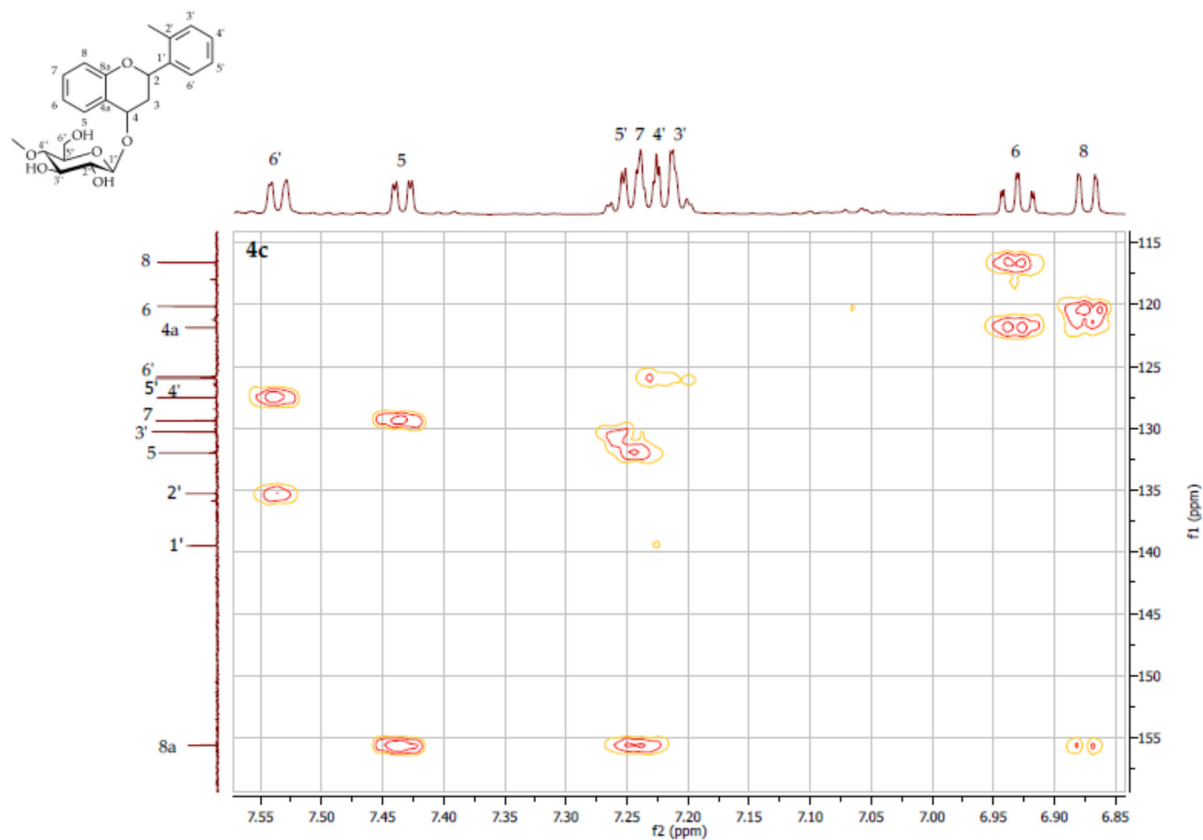

**Figure S68.** HMBC contour map –  $^1\text{H} \times ^{13}\text{C}$  expansion of 2-(2'-methylphenyl)-chromane 4-O- $\beta$ -D-(4''-O-methyl)-glucopyranoside (**4c**)



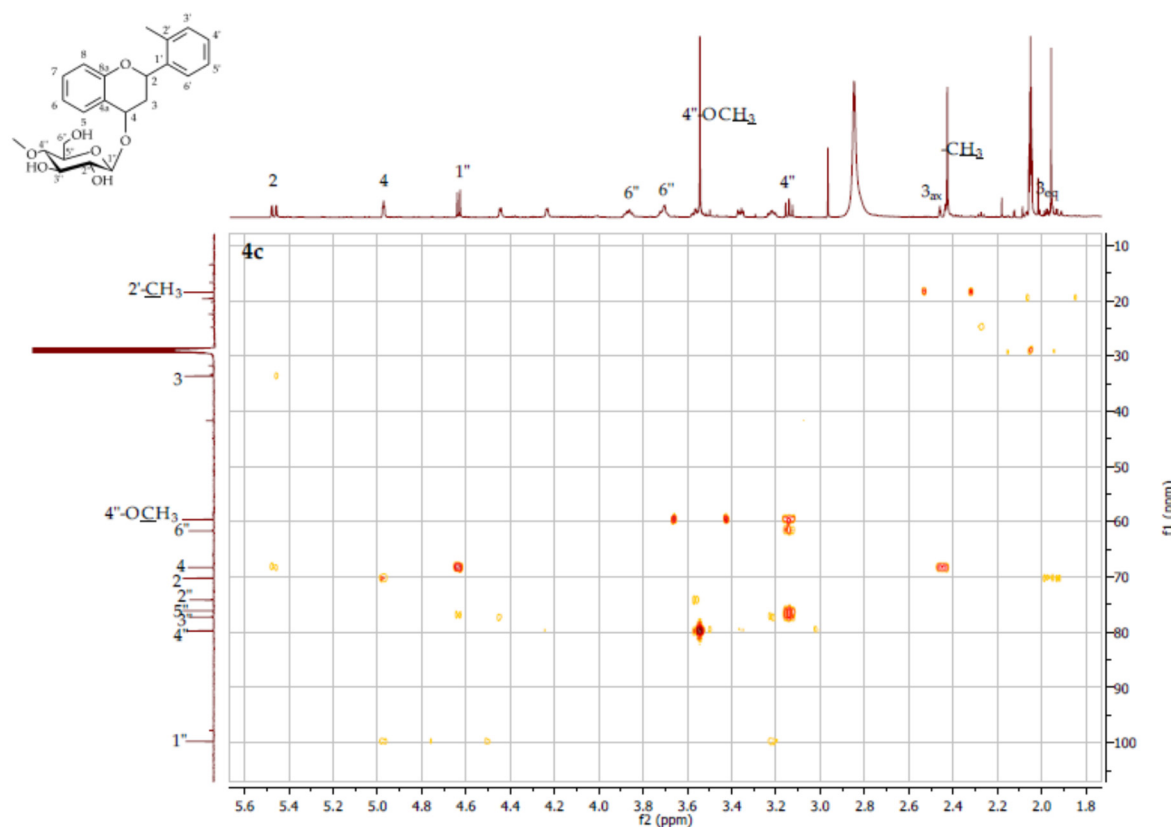

**Figure S69.** HMBC contour map –  $^1\text{H} \times ^{13}\text{C}$  expansion of 2-(2'-methylphenyl)-chromane 4-O- $\beta$ -D-(4''-O-methyl)-glucopyranoside (**4c**)

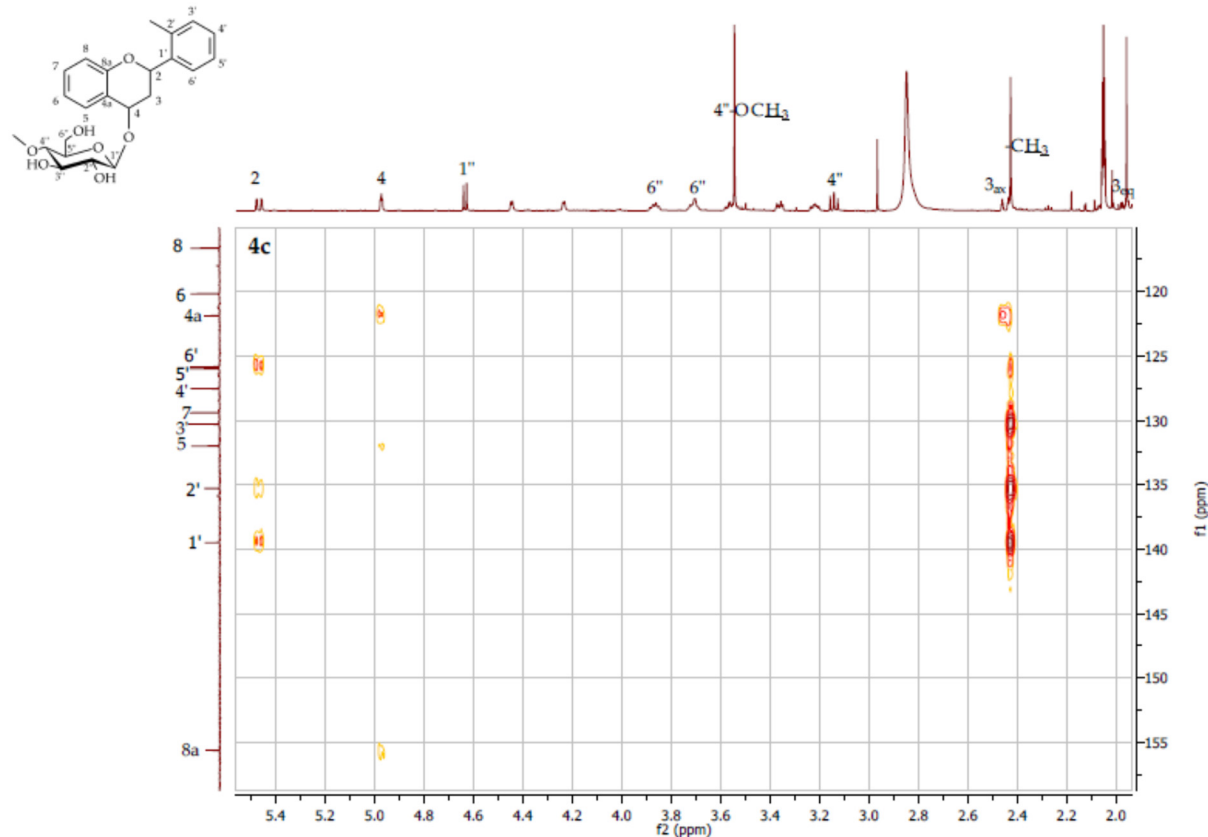

**Figure S70.** HMBC contour map –  $^1\text{H} \times ^{13}\text{C}$  expansion of 2-(2'-methylphenyl)-chromane 4-O- $\beta$ -D-(4''-O-methyl)-glucopyranoside (**4c**)

Molecular formula: C<sub>23</sub>H<sub>26</sub>O<sub>8</sub>

Formula weight: 430.16

Ionization mode: positive

Precursor: [M + H]<sup>+</sup> 431.20

431.2000>390.0500 CE: -8.0

431.2000>312.3000 CE: -23.0

431.2000>255.1000 CE: -15.0

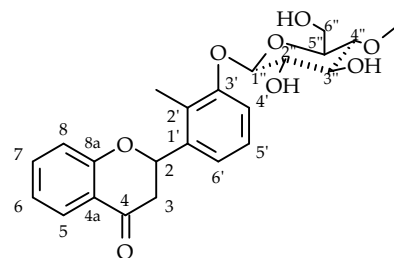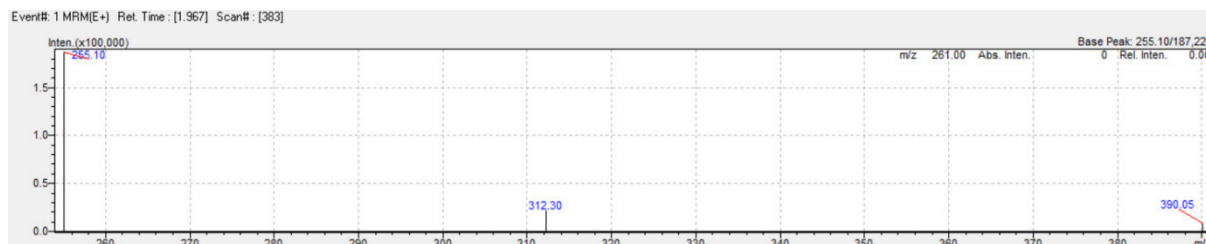

**Figure S71.** MS analysis of 2'-methylflavanone 3'-O- $\beta$ -D-(4''-O-methyl)-glucopyranoside (**4d**)

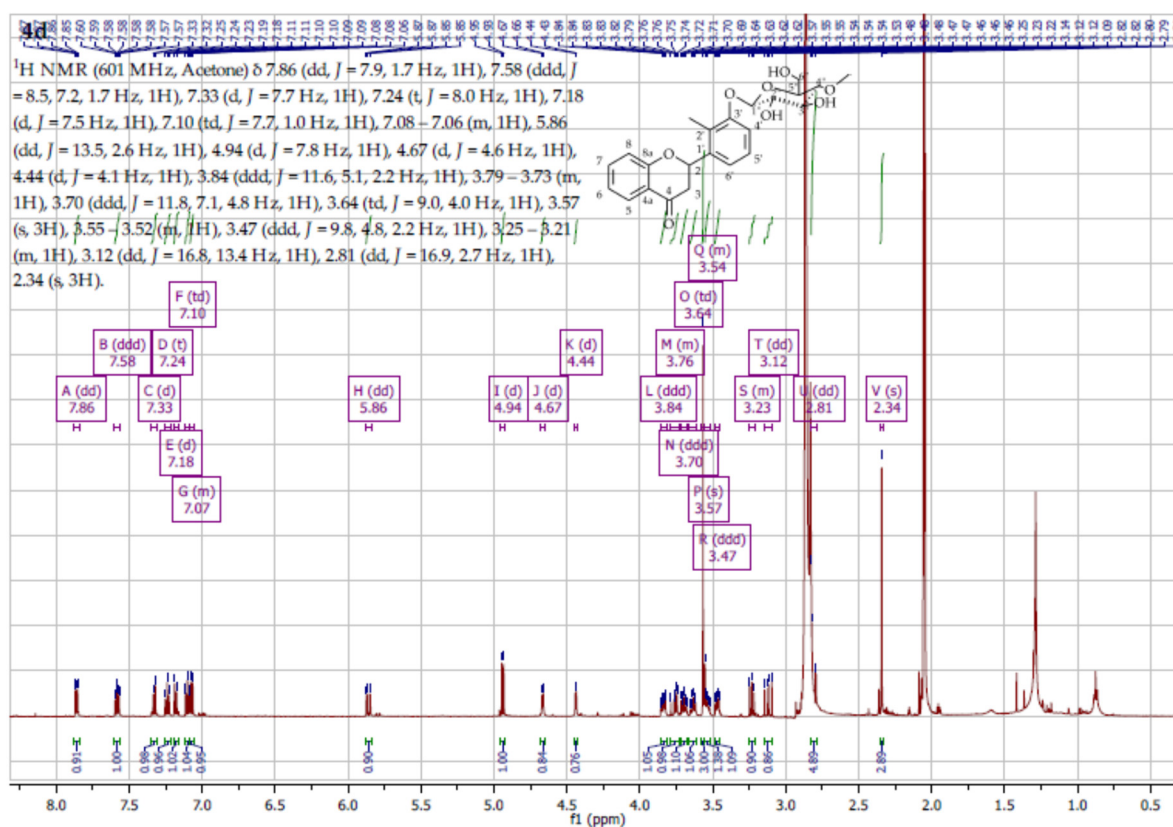

**Figure S72.** <sup>1</sup>H NMR spectrum ( $\delta$ , acetone-d<sub>6</sub>, 600 MHz) of 2'-methylflavanone 3'-O- $\beta$ -D-(4''-O-methyl)-glucopyranoside (**4d**)

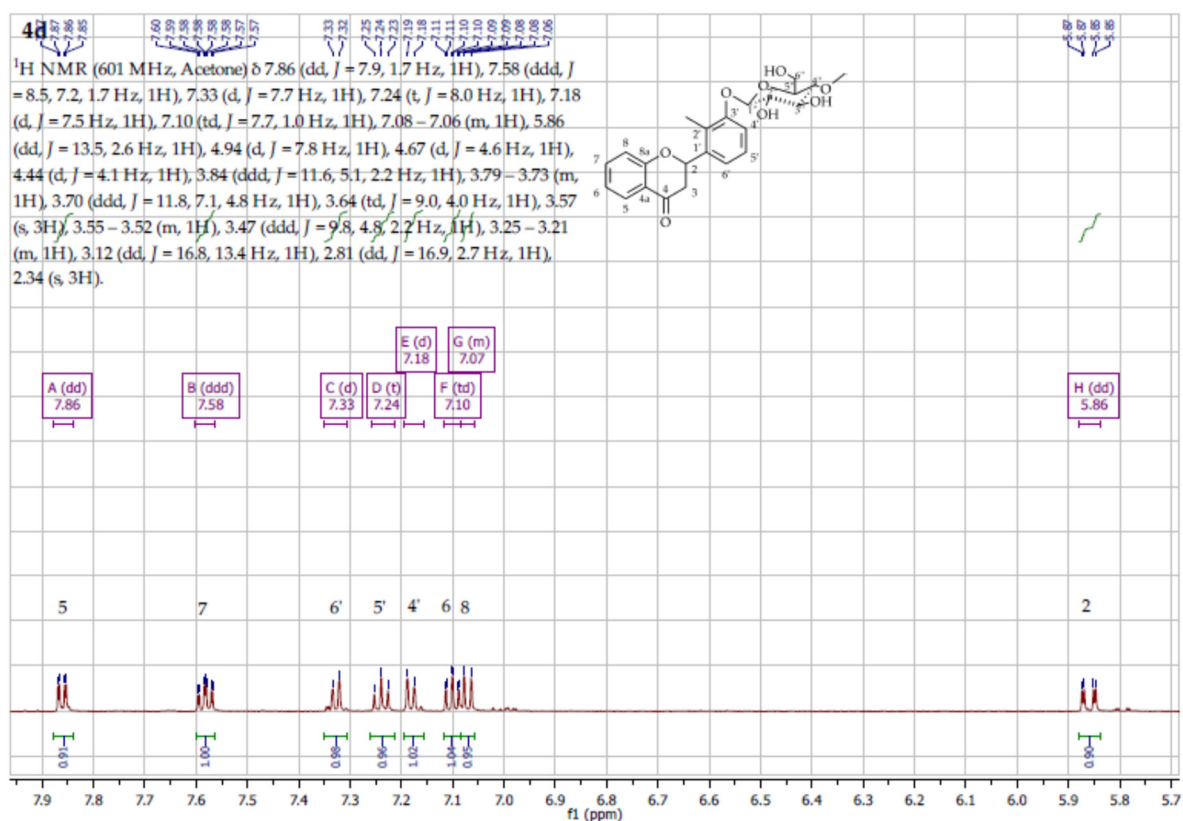

**Figure S73.** <sup>1</sup>H NMR spectrum expansion (δ, acetone-d<sub>6</sub>, 600 MHz) of 2'-methylflavanone 3'-O-β-D-(4''-O-methyl)-glucopyranoside (**4d**)

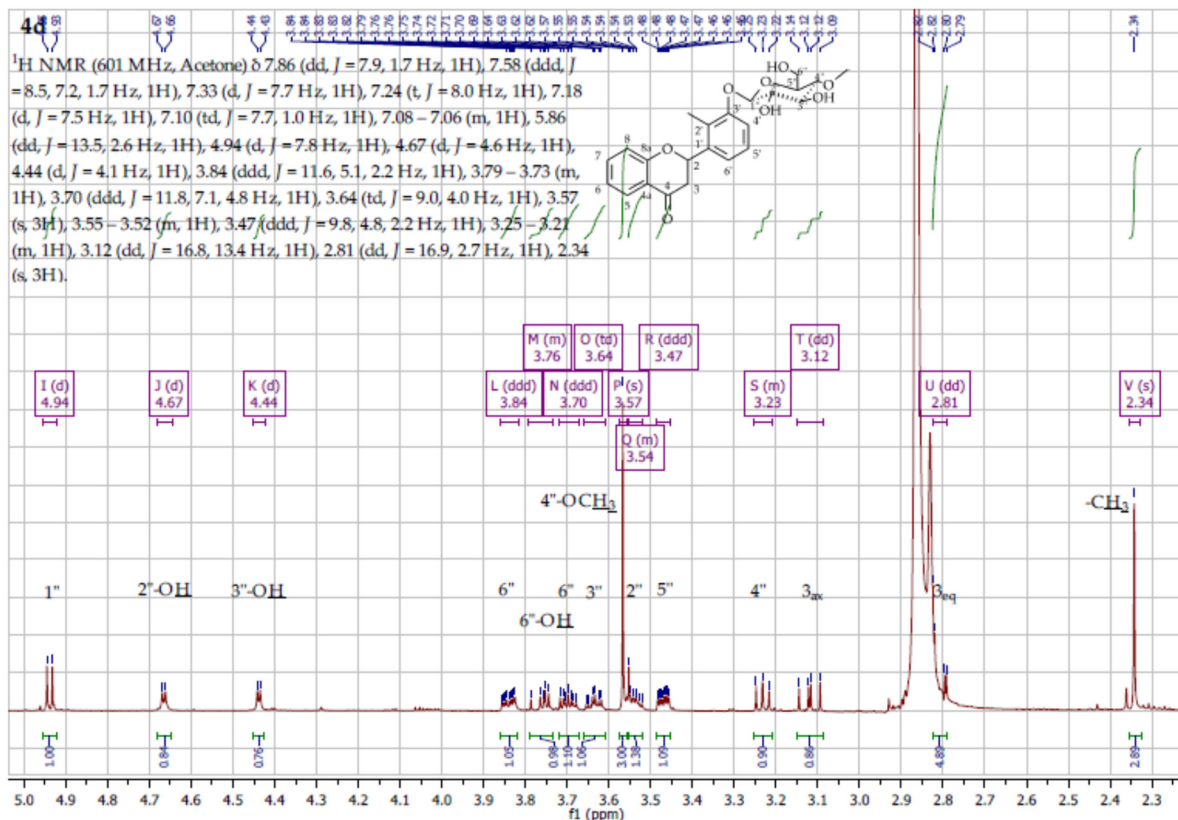

**Figure S74.** <sup>1</sup>H NMR spectrum expansion (δ, acetone-d<sub>6</sub>, 600 MHz) of 2'-methylflavanone 3'-O-β-D-(4''-O-methyl)-glucopyranoside (**4d**)

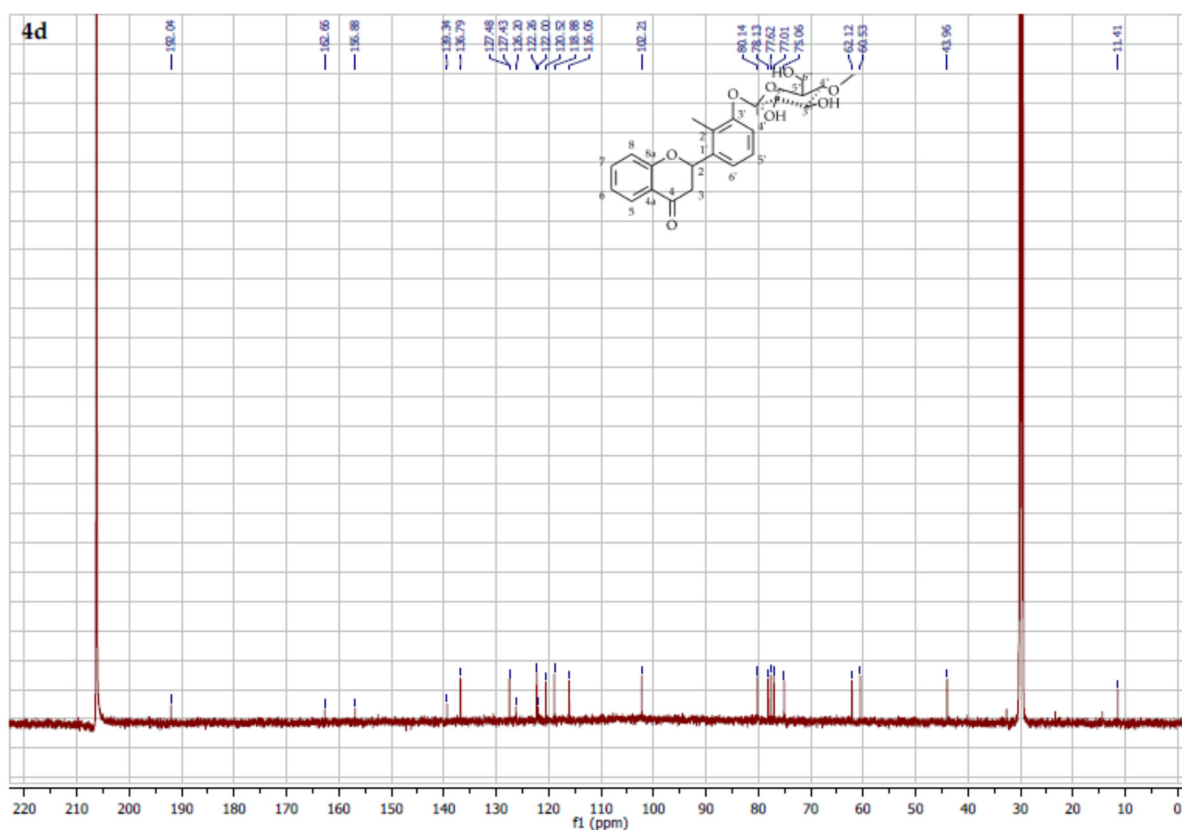

**Figure S75.**  $^{13}\text{C}$  NMR spectrum ( $\delta$ , acetone- $\text{d}_6$ , 151 MHz) of 2'-methylflavanone 3'-O- $\beta$ -D-(4''-O-methyl)-glucopyranoside (**4d**)

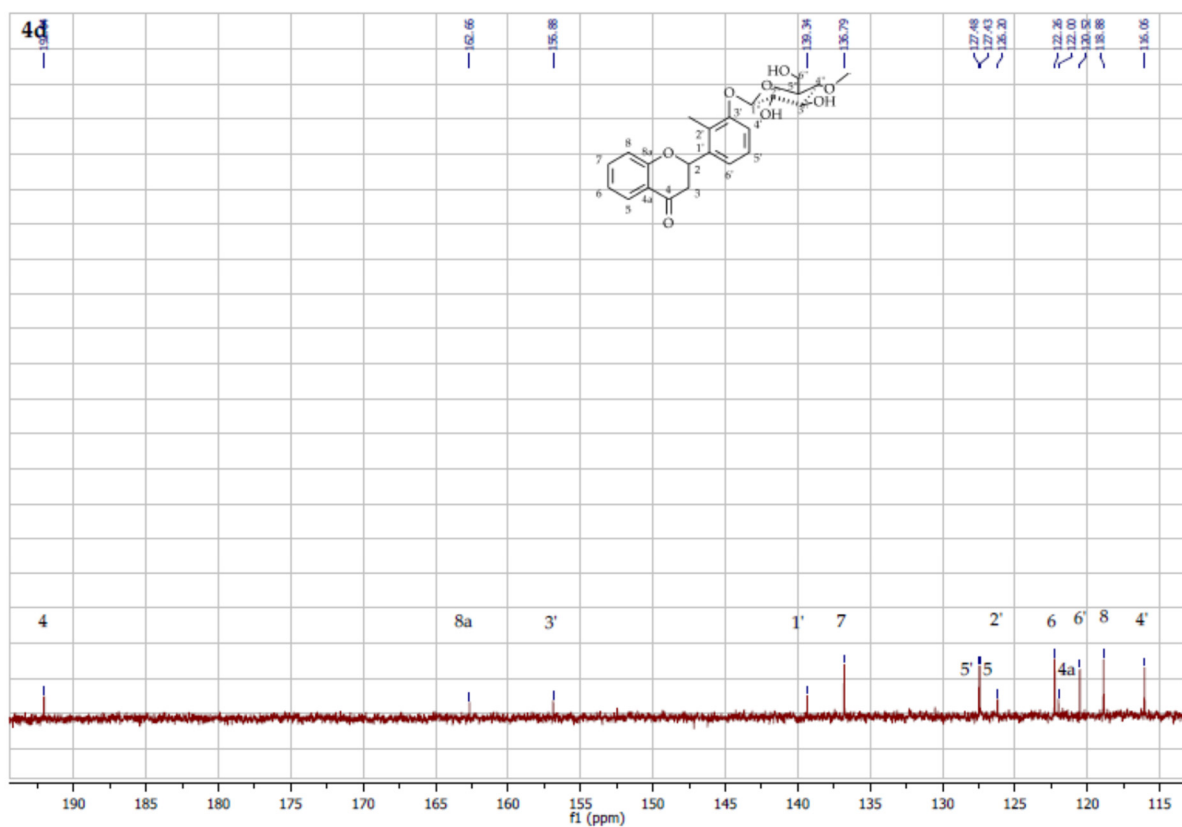

**Figure S76.**  $^{13}\text{C}$  NMR spectrum expansion ( $\delta$ , acetone- $\text{d}_6$ , 151 MHz) of 2'-methylflavanone 3'-O- $\beta$ -D-(4''-O-methyl)-glucopyranoside (**4d**)

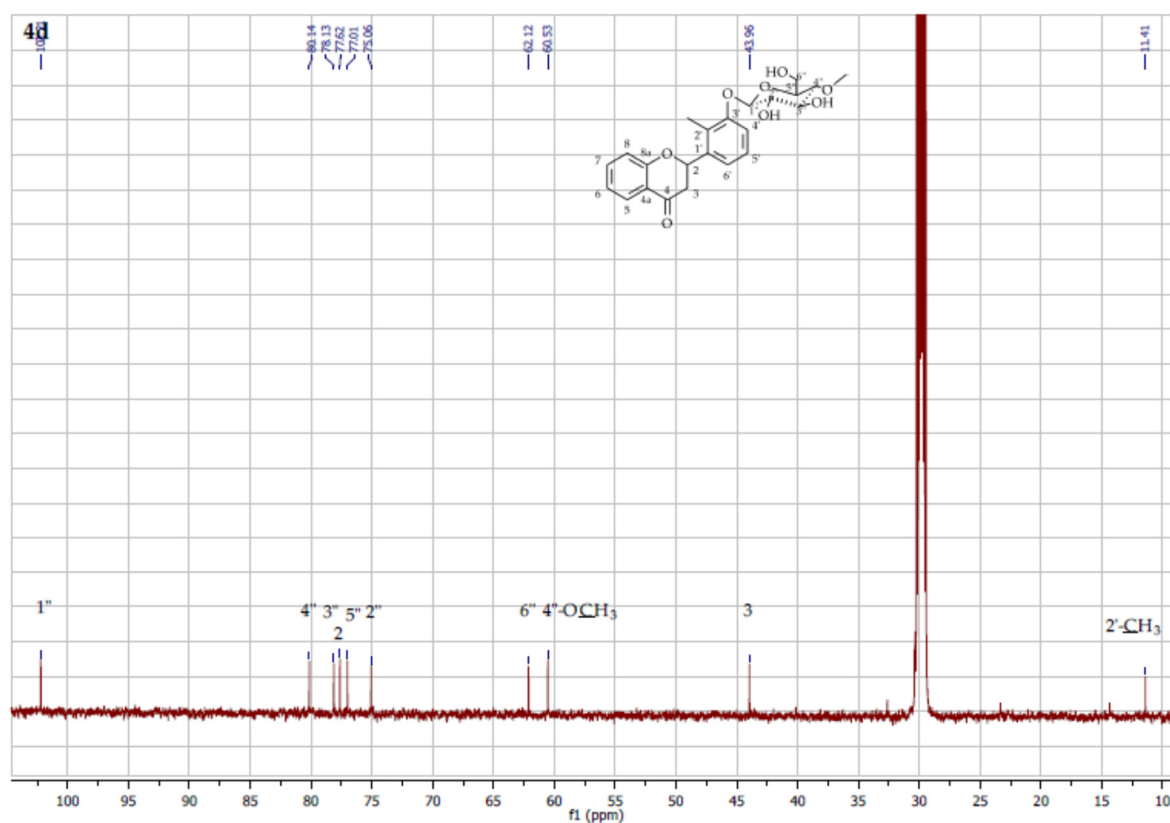

**Figure S77.**  $^{13}\text{C}$  NMR spectrum expansion ( $\delta$ , acetone- $d_6$ , 151 MHz) of 2'-methylflavanone 3'- $O$ - $\beta$ -D-(4''- $O$ -methyl)-glucopyranoside (**4d**)

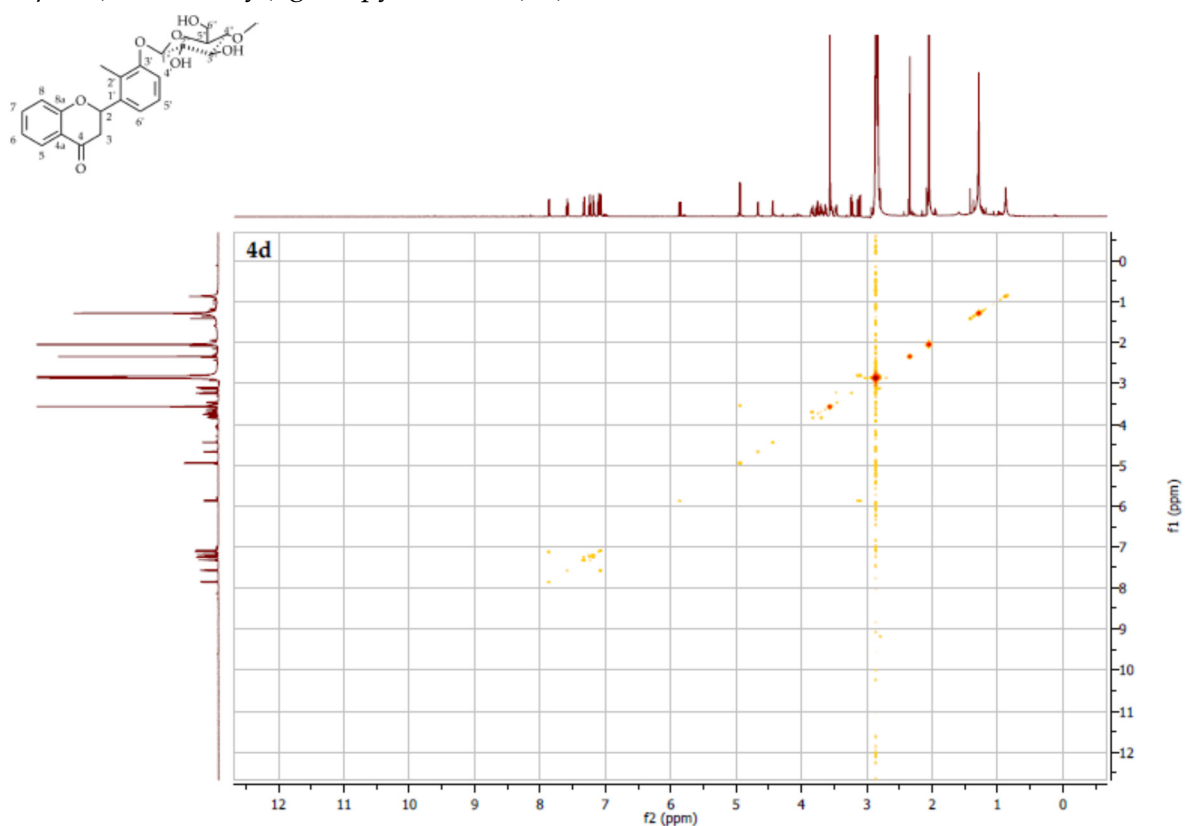

**Figure S78.** COSY contour map –  $^1\text{H} \times ^1\text{H}$  of 2'-methylflavanone 3'- $O$ - $\beta$ -D-(4''- $O$ -methyl)-glucopyranoside (**4d**)

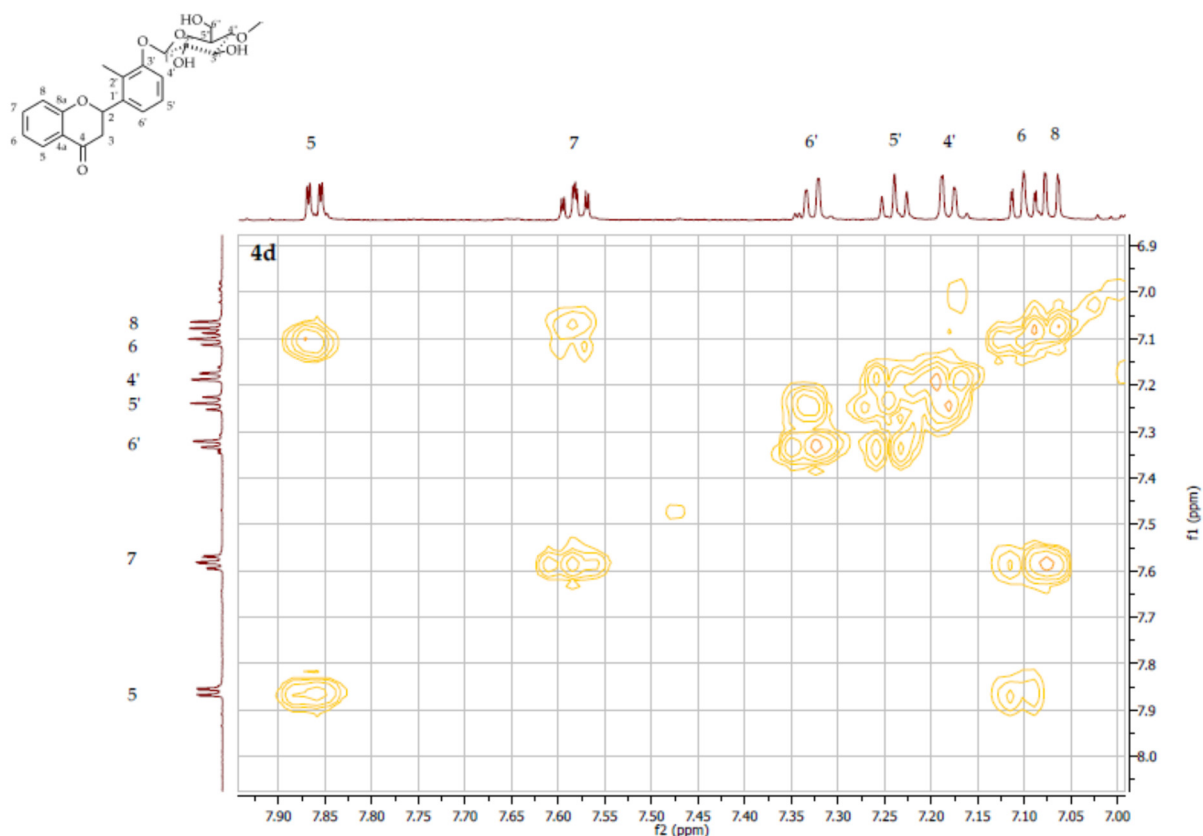

**Figure S79.** COSY contour map –  $^1\text{H} \times ^1\text{H}$  expansion of 2'-methylflavanone 3'-O- $\beta$ -D-(4''-O-methyl)-glucopyranoside (**4d**)

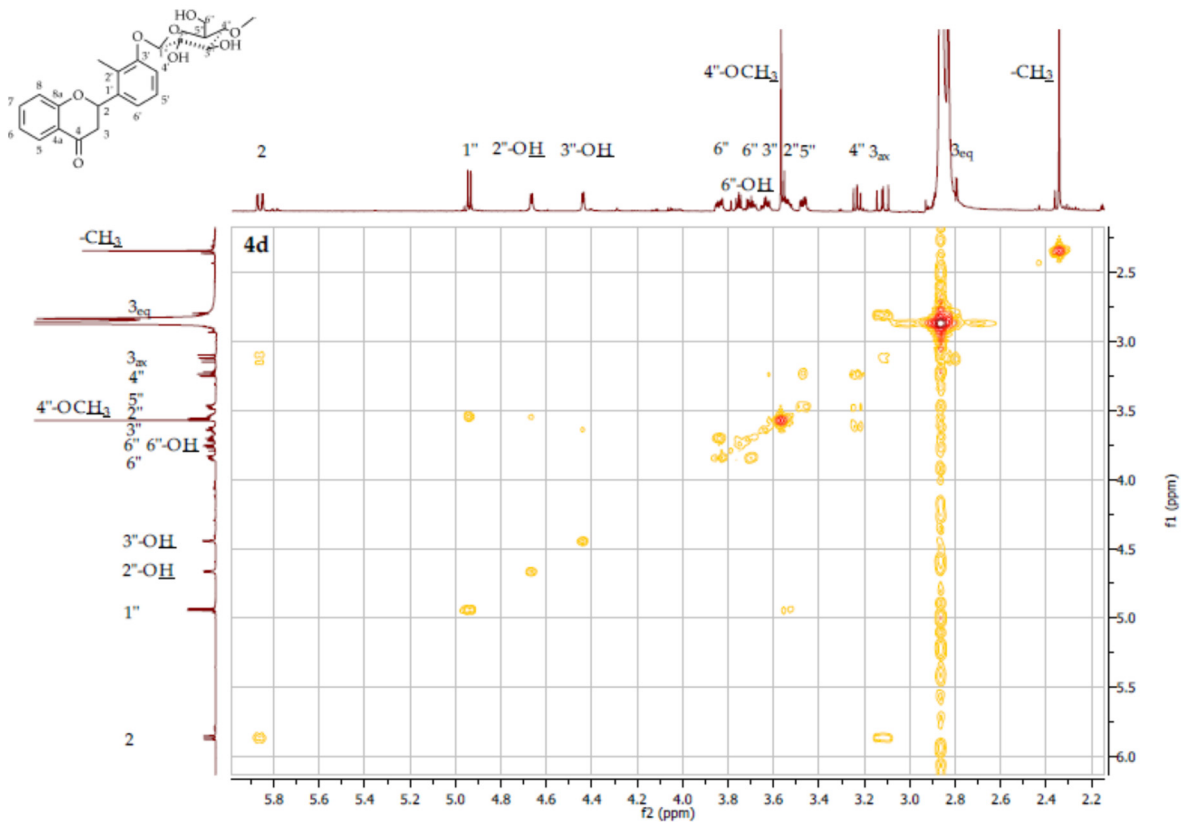

**Figure S80.** COSY contour map –  $^1\text{H} \times ^1\text{H}$  expansion of 2'-methylflavanone 3'-O- $\beta$ -D-(4''-O-methyl)-glucopyranoside (**4d**)



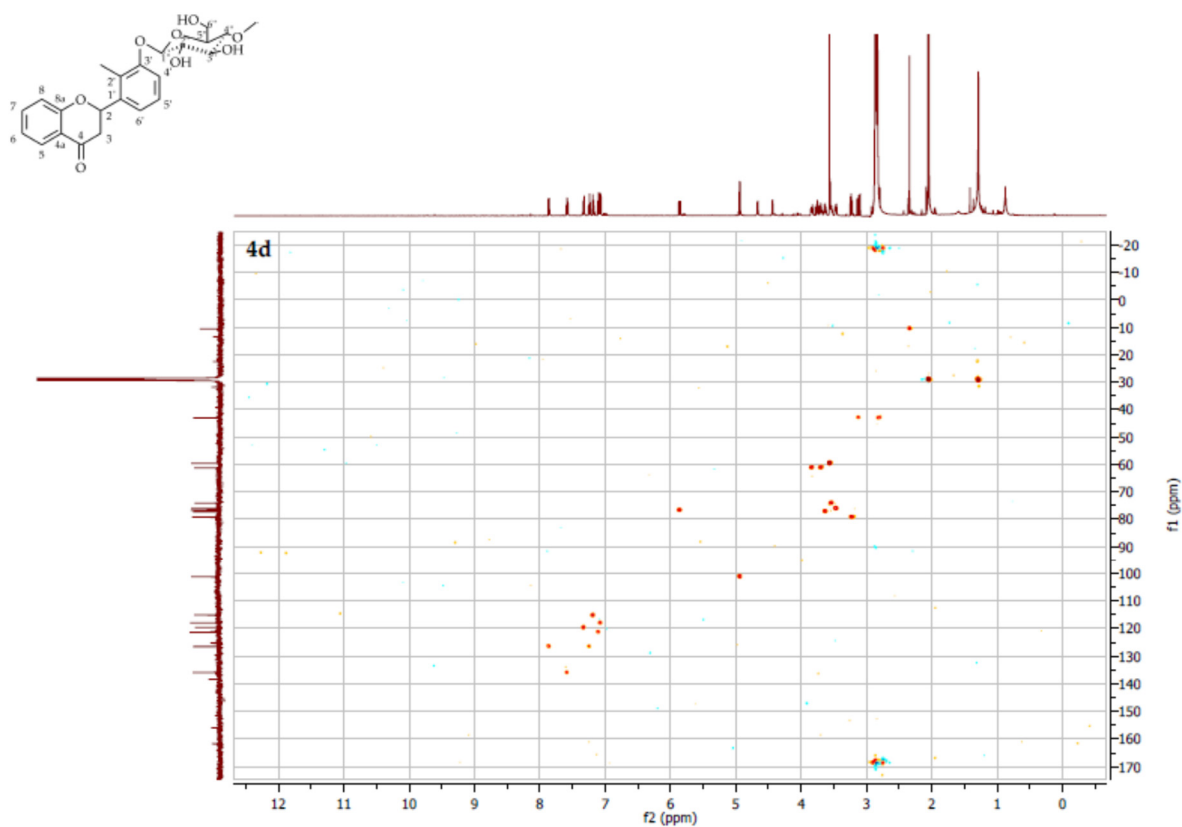

**Figure S81.** HSQC contour map –  $^1\text{H} \times ^{13}\text{C}$  of 2'-methylflavanone 3'-O- $\beta$ -D-(4''-O-methyl)-glucopyranoside (**4d**)

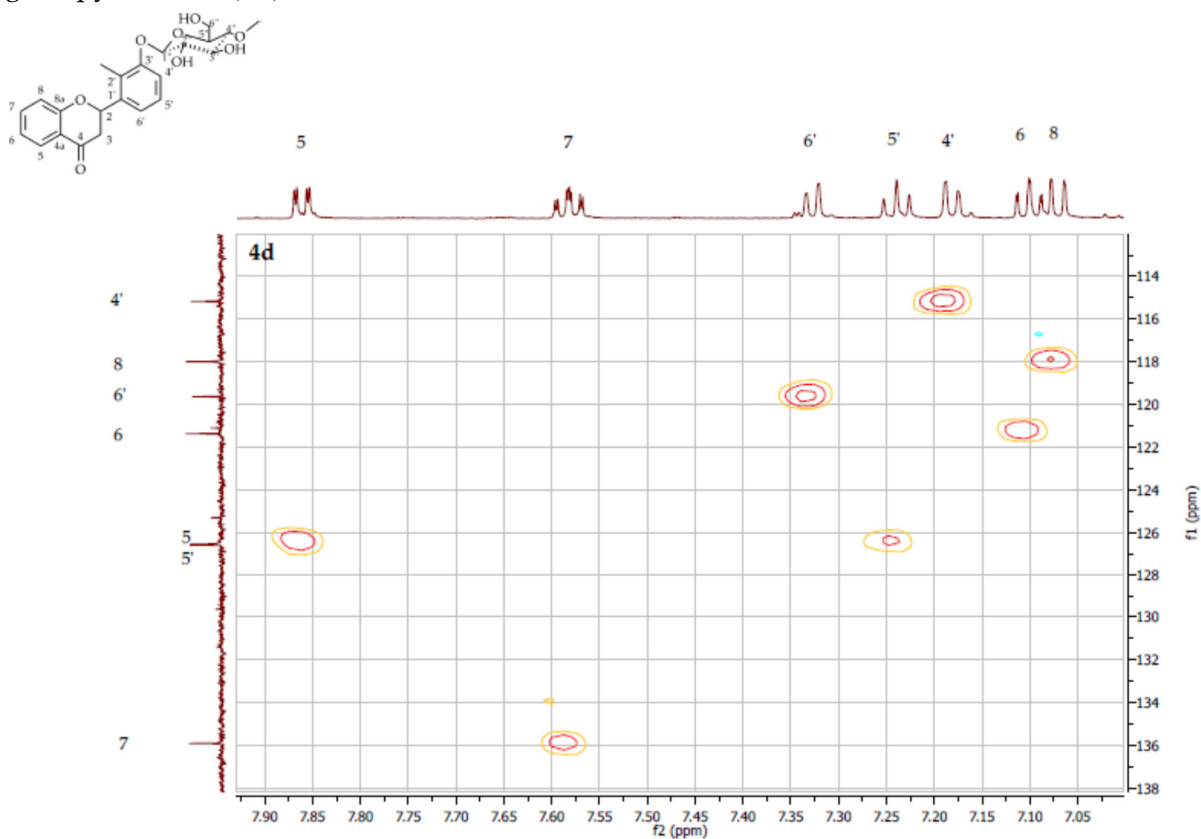

**Figure S82.** HSQC contour map –  $^1\text{H} \times ^{13}\text{C}$  expansion of 2'-methylflavanone 3'-O- $\beta$ -D-(4''-O-methyl)-glucopyranoside (**4d**)

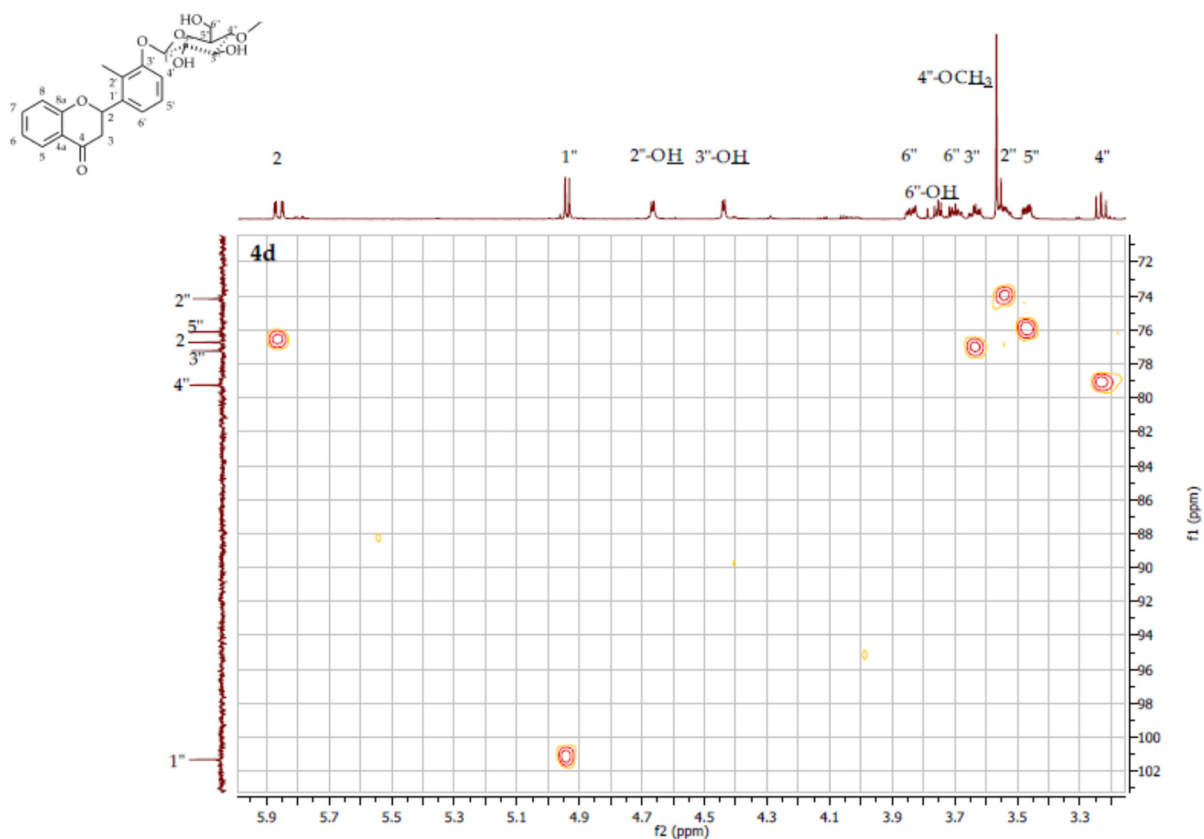

**Figure S83.** HSQC contour map –  $^1\text{H} \times ^{13}\text{C}$  expansion of 2'-methylflavanone 3'-O- $\beta$ -D-(4''-O-methyl)-glucopyranoside (4d)

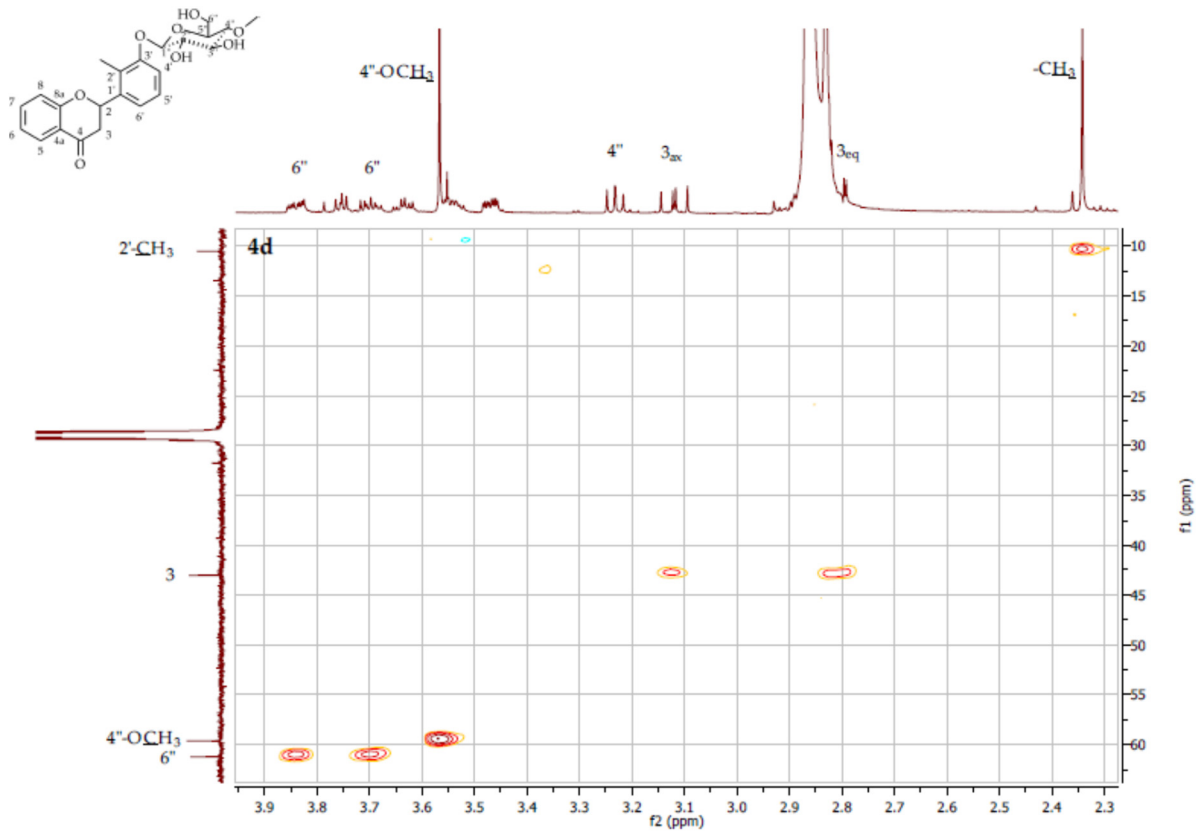

**Figure S84.** HSQC contour map –  $^1\text{H} \times ^{13}\text{C}$  expansion of 2'-methylflavanone 3'-O- $\beta$ -D-(4''-O-methyl)-glucopyranoside (4d)



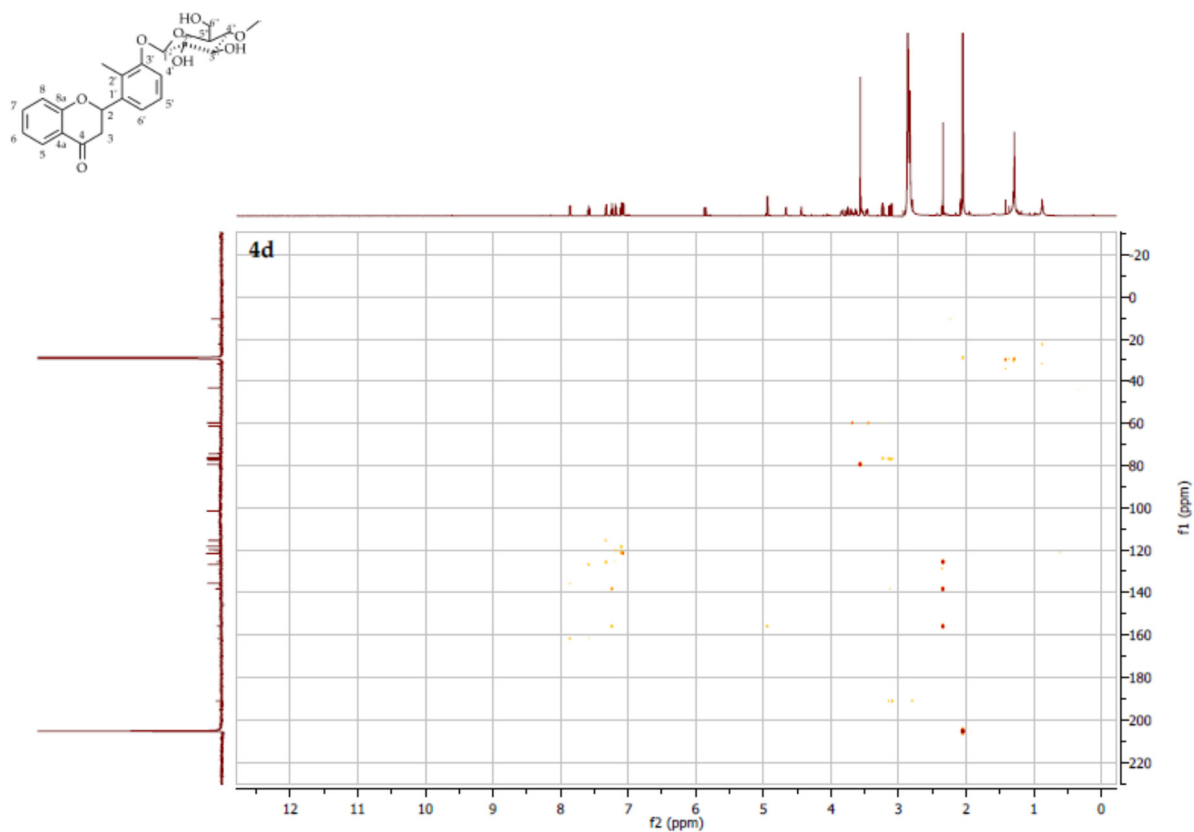

**Figure S85.** HMBC contour map –  $^1\text{H} \times ^{13}\text{C}$  of 2'-methylflavanone 3'-O- $\beta$ -D-(4''-O-methyl)-glucopyranoside (**4d**)

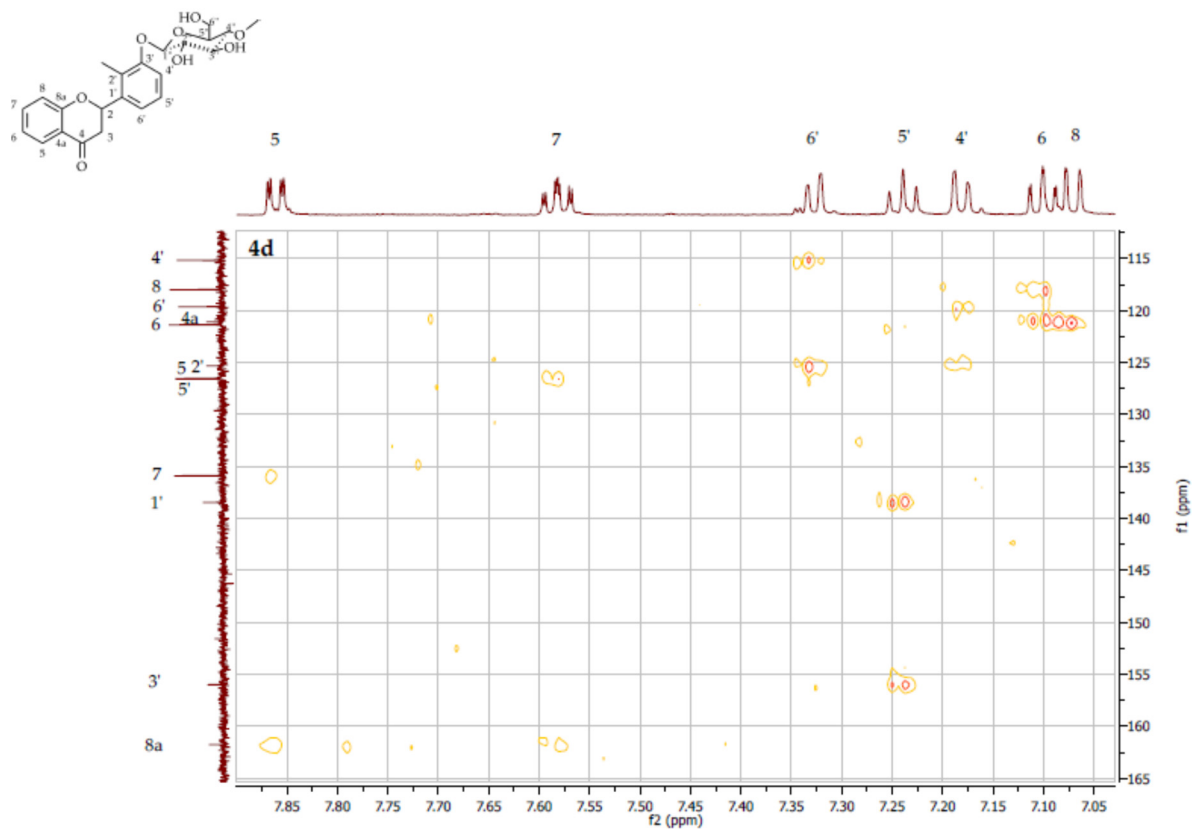

**Figure S86.** HMBC contour map –  $^1\text{H} \times ^{13}\text{C}$  expansion of 2'-methylflavanone 3'-O- $\beta$ -D-(4''-O-methyl)-glucopyranoside (**4d**)

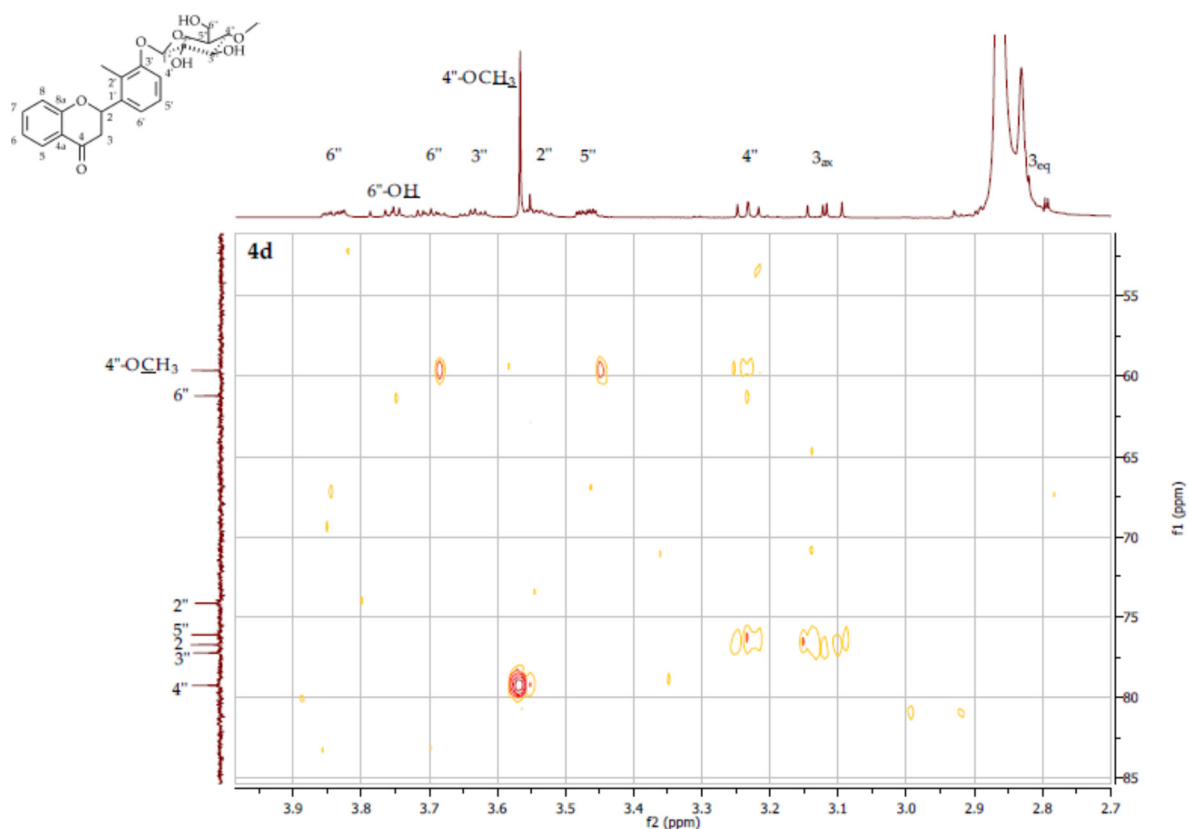

**Figure S87.** HMBC contour map –  $^1\text{H} \times ^{13}\text{C}$  expansion of 2'-methylflavanone 3'-O- $\beta$ -D-(4''-O-methyl)-glucopyranoside (4d)

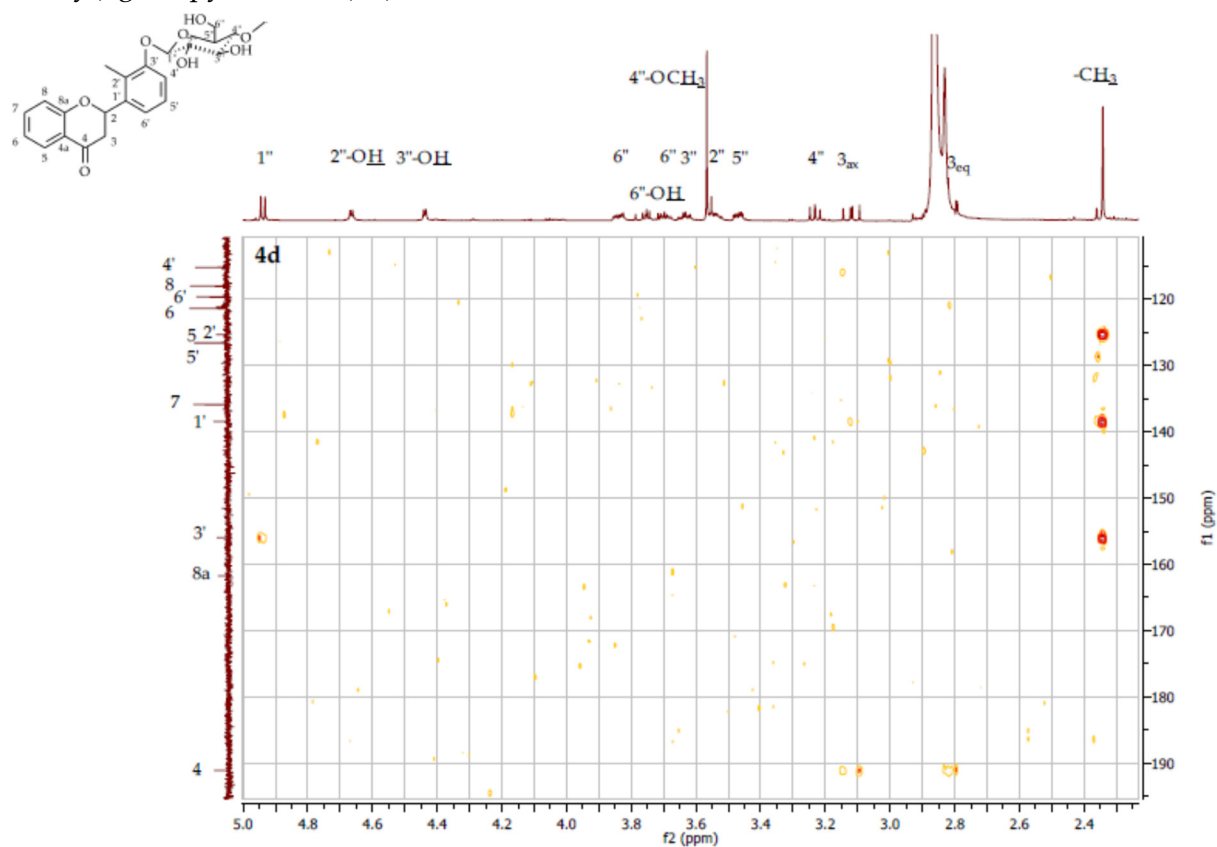

**Figure S88.** HMBC contour map –  $^1\text{H} \times ^{13}\text{C}$  expansion of 2'-methylflavanone 3'-O- $\beta$ -D-(4''-O-methyl)-glucopyranoside (4d)

Molecular formula: C<sub>15</sub>H<sub>20</sub>O<sub>8</sub>

Formula weight: 328.12

Ionization mode: negative

Precursor: [M - H]<sup>-</sup> 327.40

327.4000>151.1000 CE: 15.0

327.4000>150.1000 CE: 27.0

327.4000>108.0500 CE: 33.0

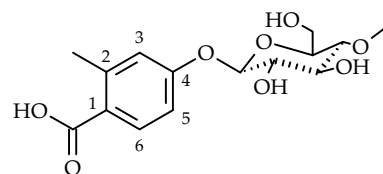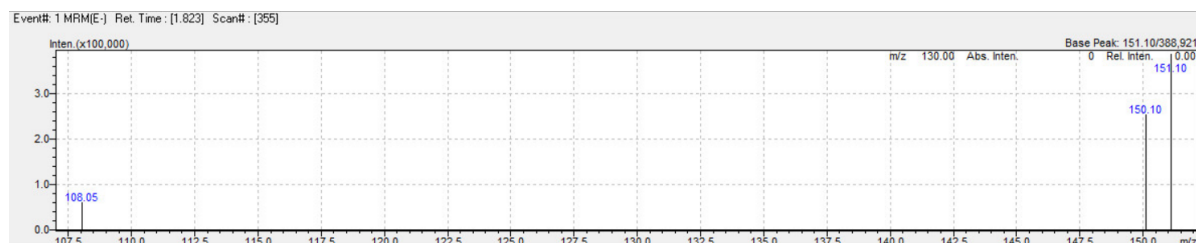

**Figure S89.** MS analysis of 2-methylbenzoic acid 4-*O*- $\beta$ -D-(4'-*O*-methyl)-glucopyranoside (**4e**)

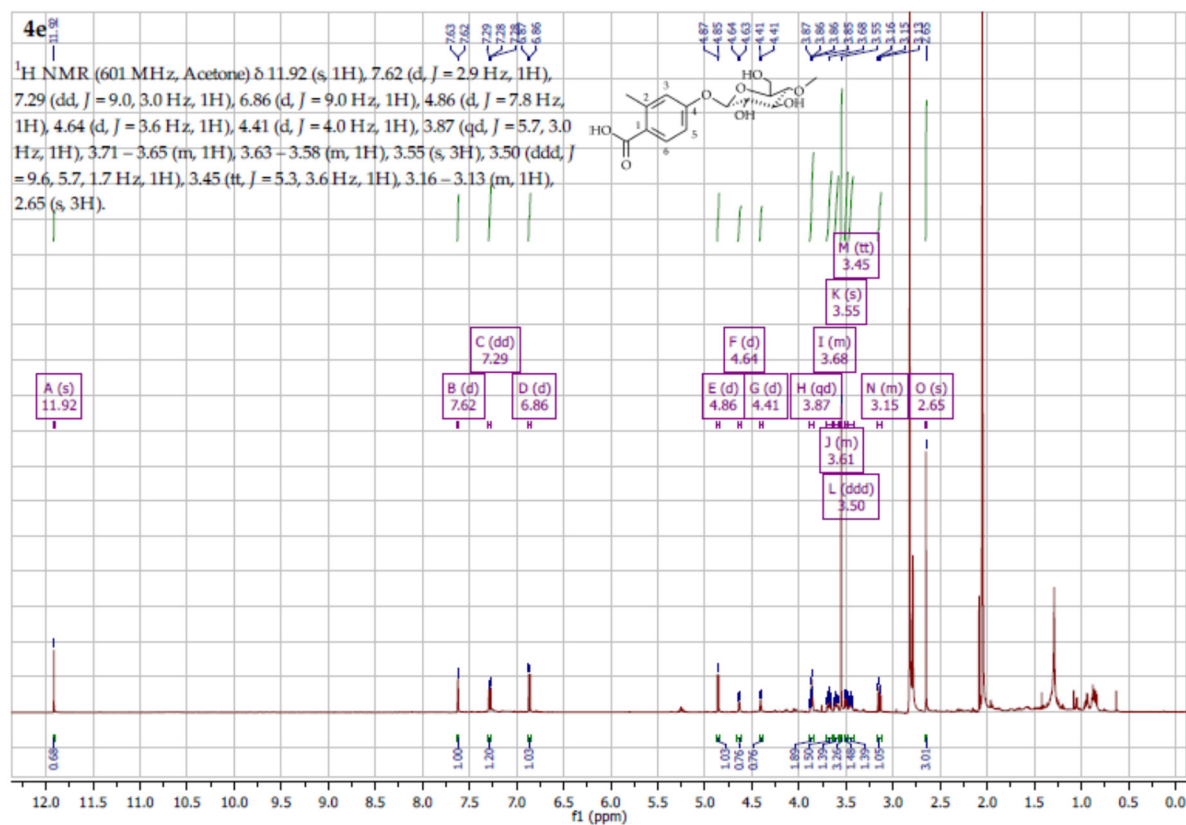

**Figure S90.** <sup>1</sup>H NMR spectrum ( $\delta$ , acetone-*d*<sub>6</sub>, 600 MHz) of 2-methylbenzoic acid 4-*O*- $\beta$ -D-(4'-*O*-methyl)-glucopyranoside (**4e**)



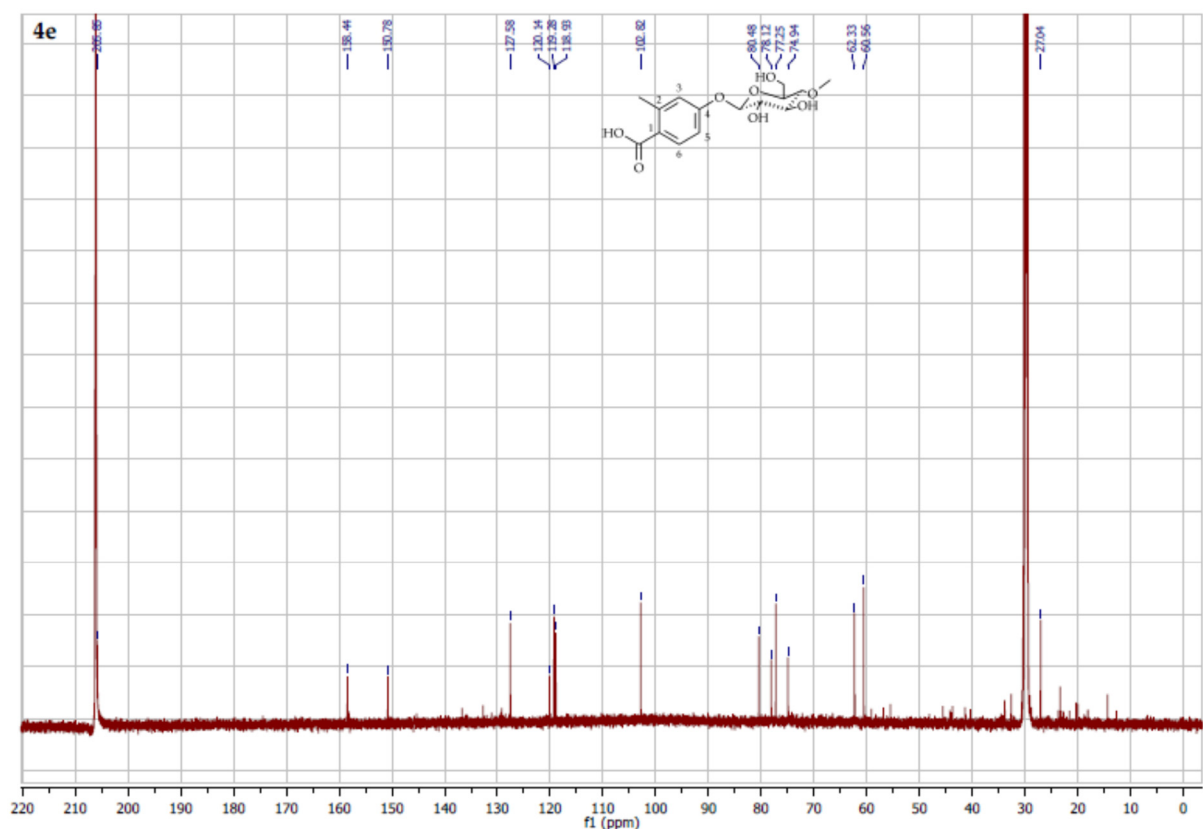

**Figure S93.**  $^{13}\text{C}$  NMR spectrum ( $\delta$ , acetone- $\text{d}_6$ , 151 MHz) of 2-methylbenzoic acid 4-O- $\beta$ -D-(4'-O-methyl)-glucopyranoside (**4e**)

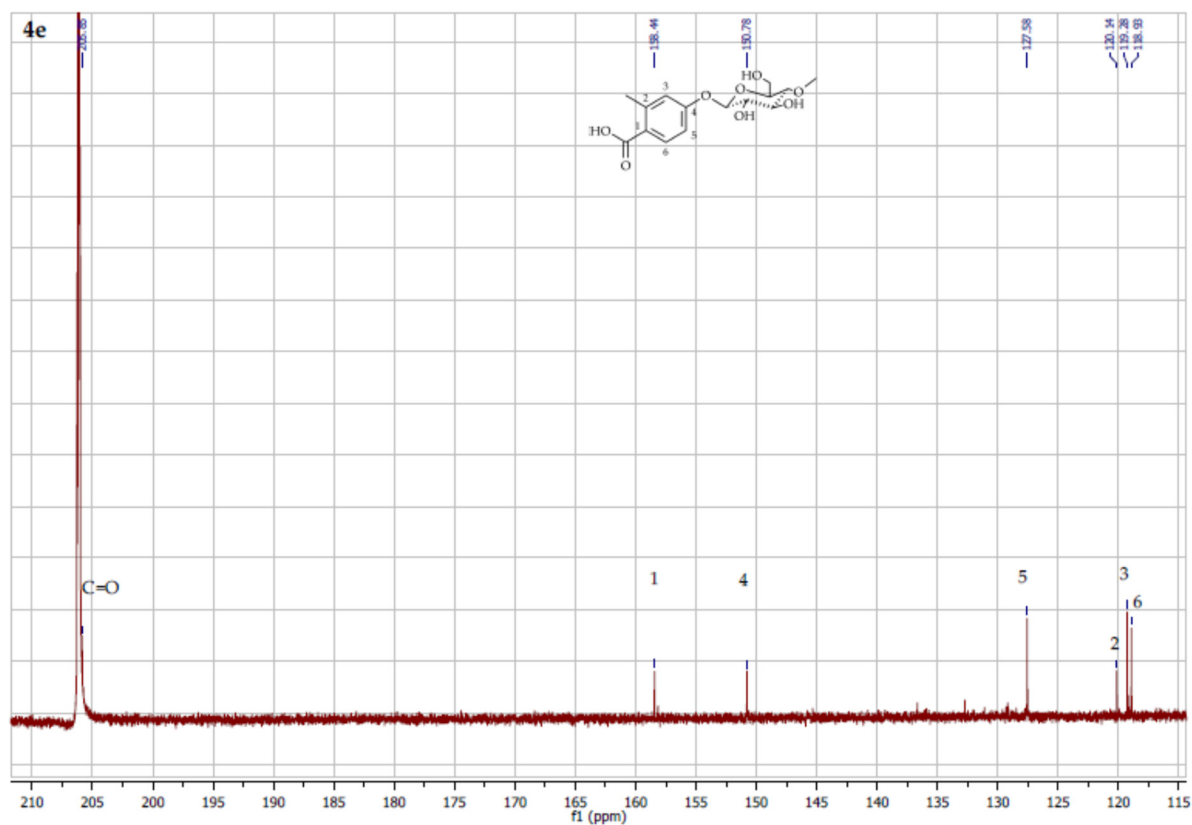

**Figure S94.**  $^{13}\text{C}$  NMR spectrum expansion ( $\delta$ , acetone- $\text{d}_6$ , 151 MHz) of 2-methylbenzoic acid 4-O- $\beta$ -D-(4'-O-methyl)-glucopyranoside (**4e**)

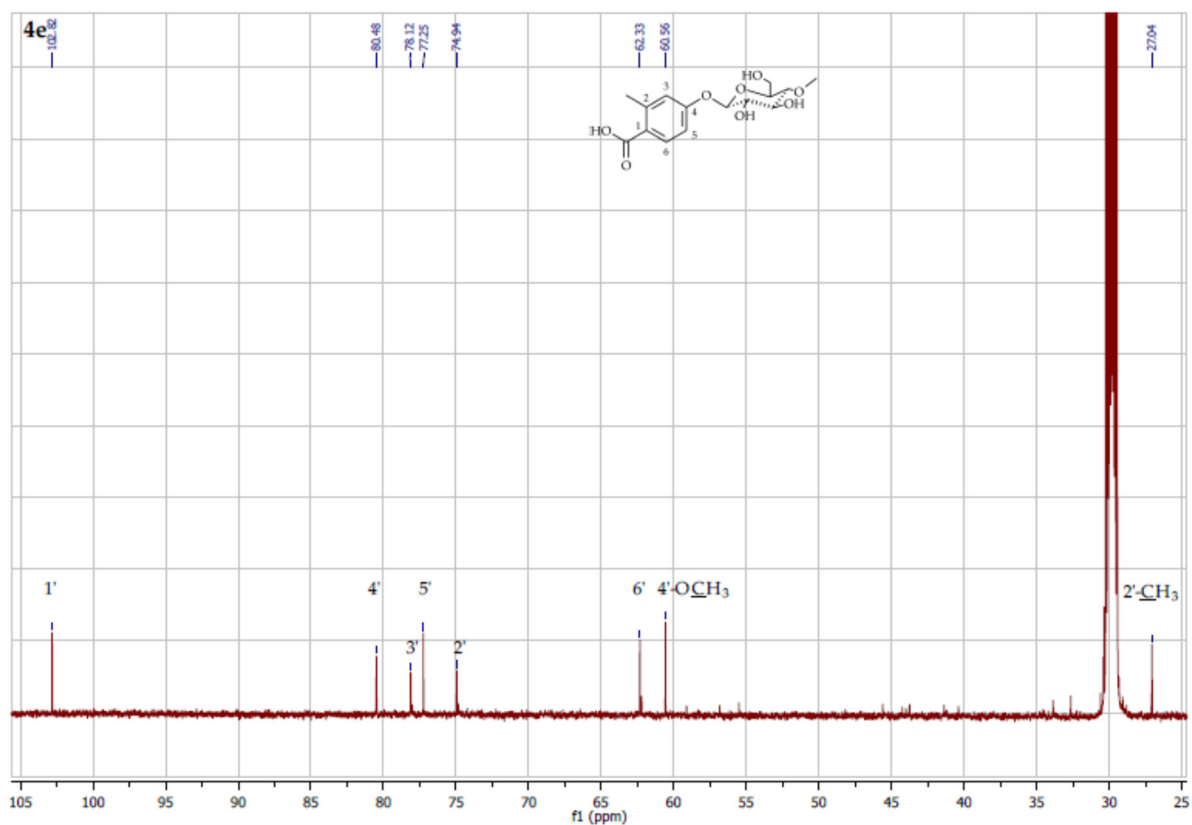

**Figure S95.**  $^{13}\text{C}$  NMR spectrum expansion ( $\delta$ , acetone- $d_6$ , 151 MHz) of 2-methylbenzoic acid 4-O- $\beta$ -D-(4'-O-methyl)-glucopyranoside (**4e**)

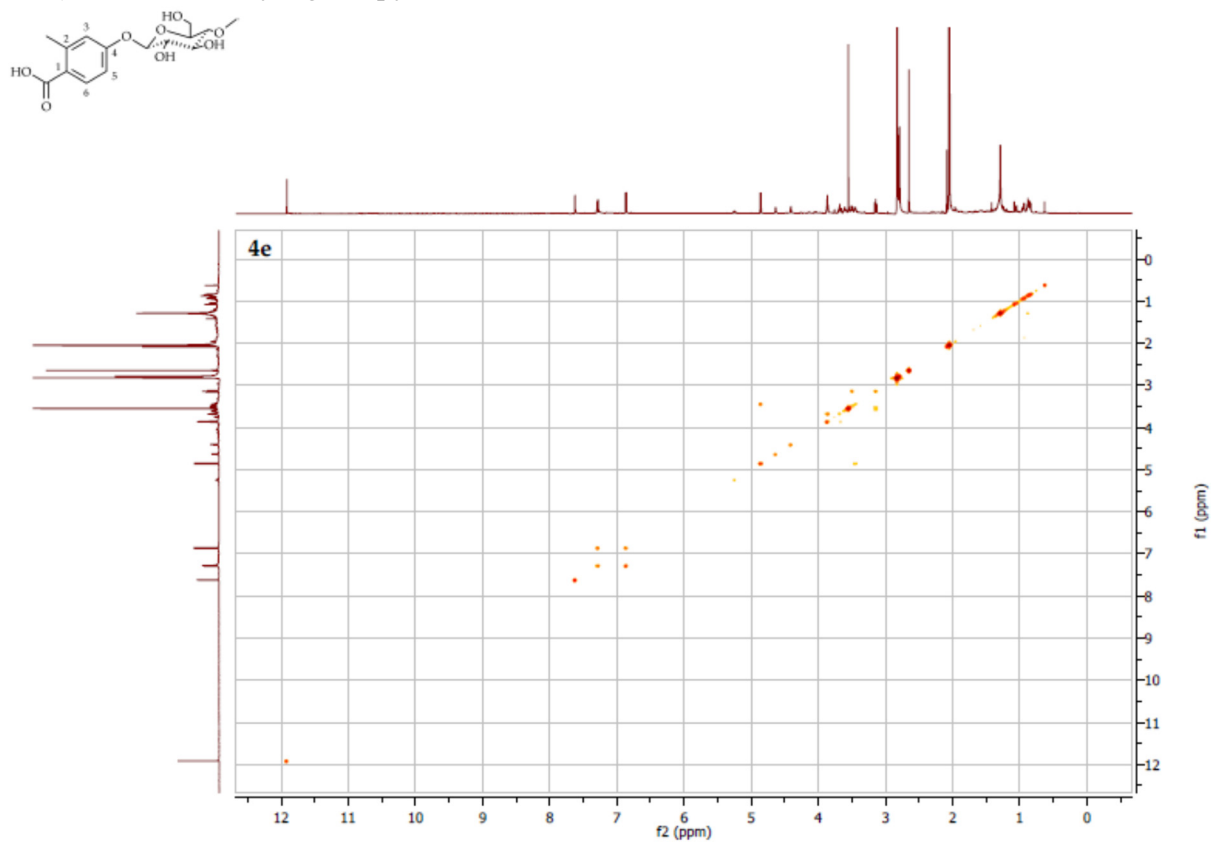

**Figure S96.** COSY contour map –  $^1\text{H} \times ^1\text{H}$  of 2-methylbenzoic acid 4-O- $\beta$ -D-(4'-O-methyl)-glucopyranoside (**4e**)

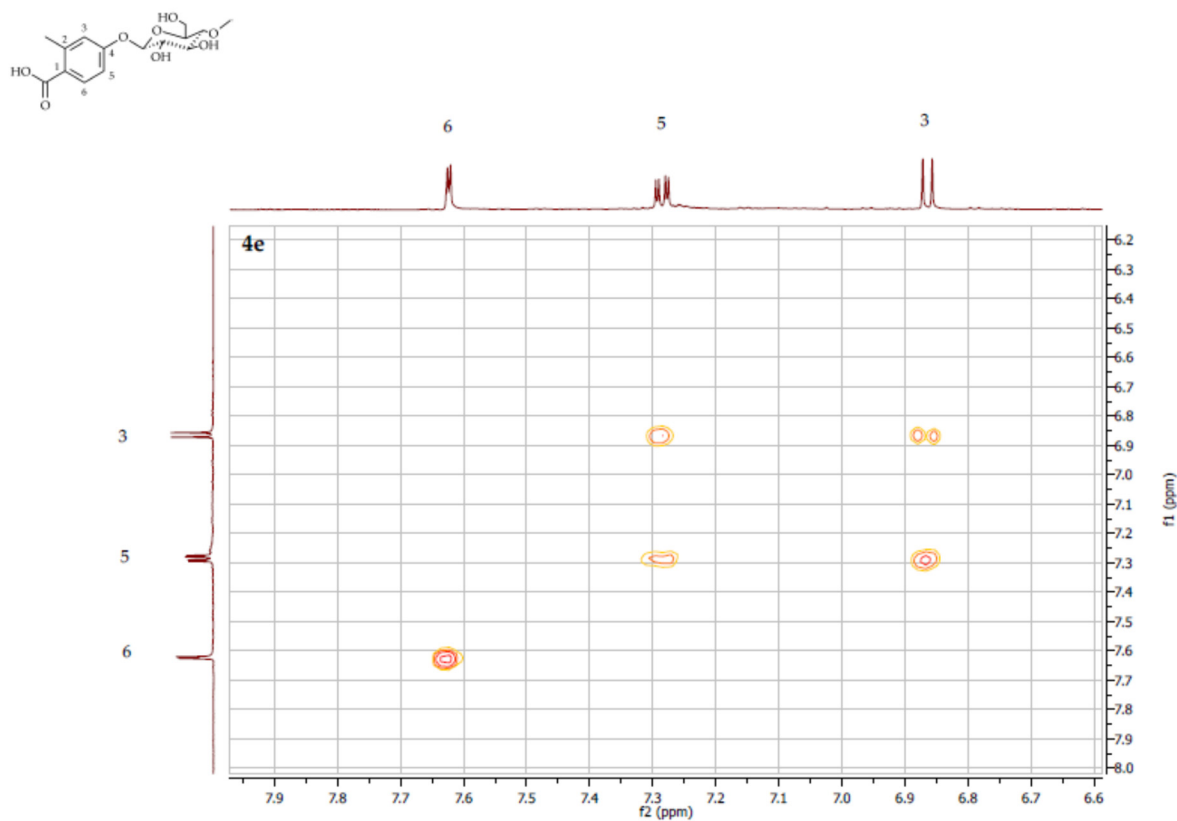

**Figure S97.** COSY contour map –  $^1\text{H} \times ^1\text{H}$  expansion of 2-methylbenzoic acid 4-O- $\beta$ -D-(4'-O-methyl)-glucopyranoside (**4e**)

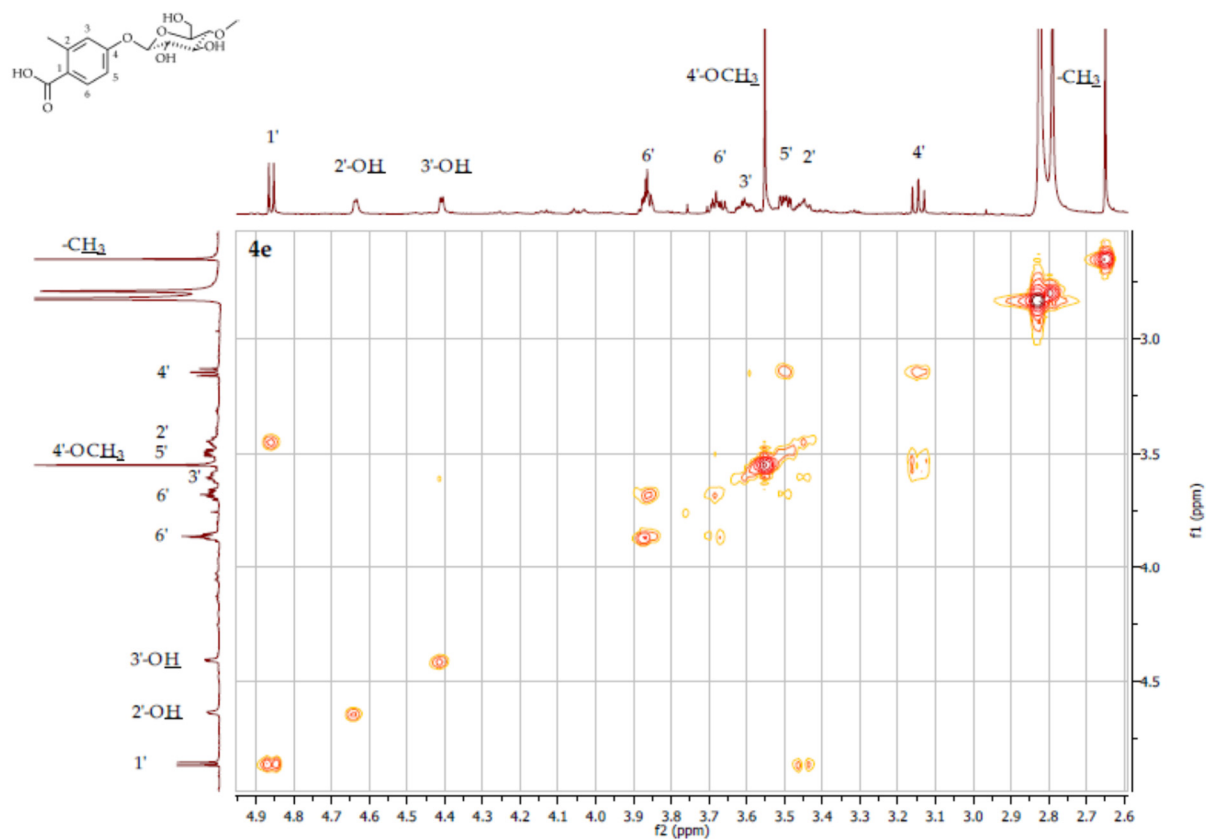

**Figure S98.** COSY contour map –  $^1\text{H} \times ^1\text{H}$  expansion of 2-methylbenzoic acid 4-O- $\beta$ -D-(4'-O-methyl)-glucopyranoside (**4e**)

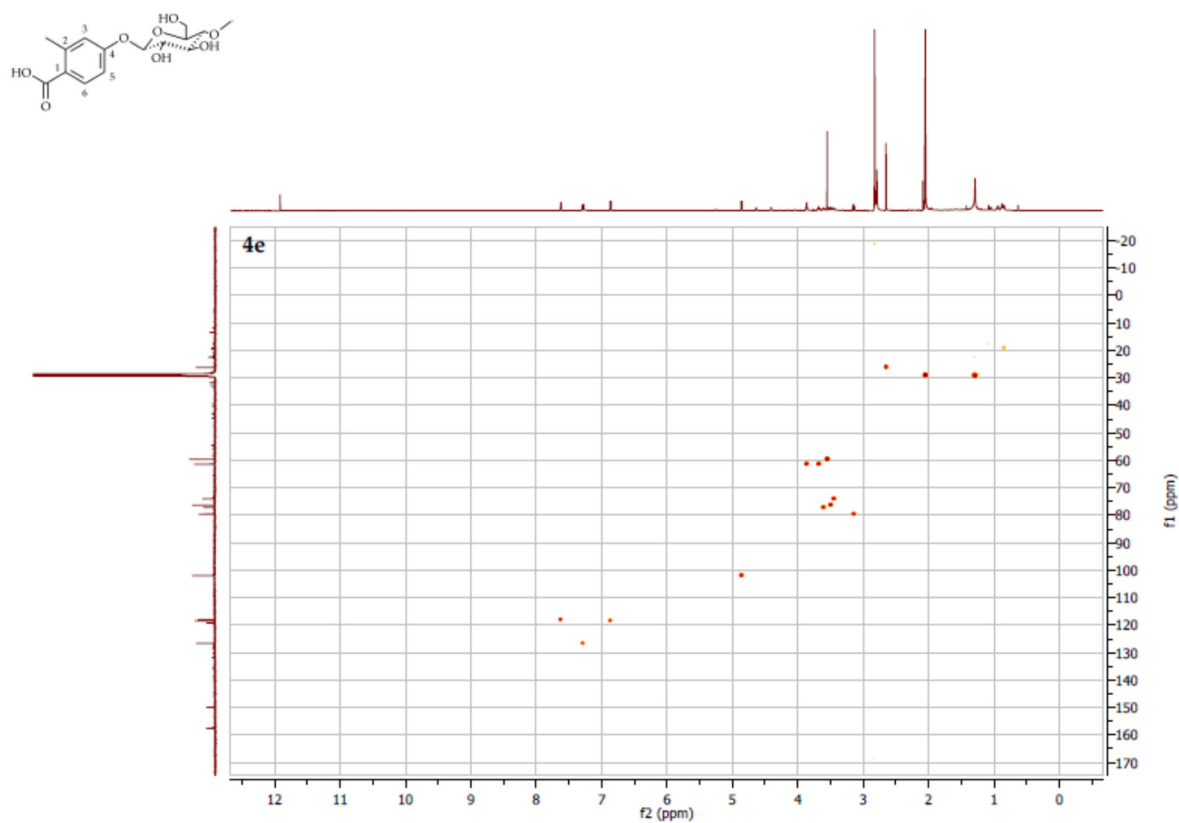

**Figure S99.** HSQC contour map –  $^1\text{H} \times ^{13}\text{C}$  2-methylbenzoic acid 4-O- $\beta$ -D-(4'-O-methyl)-glucopyranoside (**4e**)

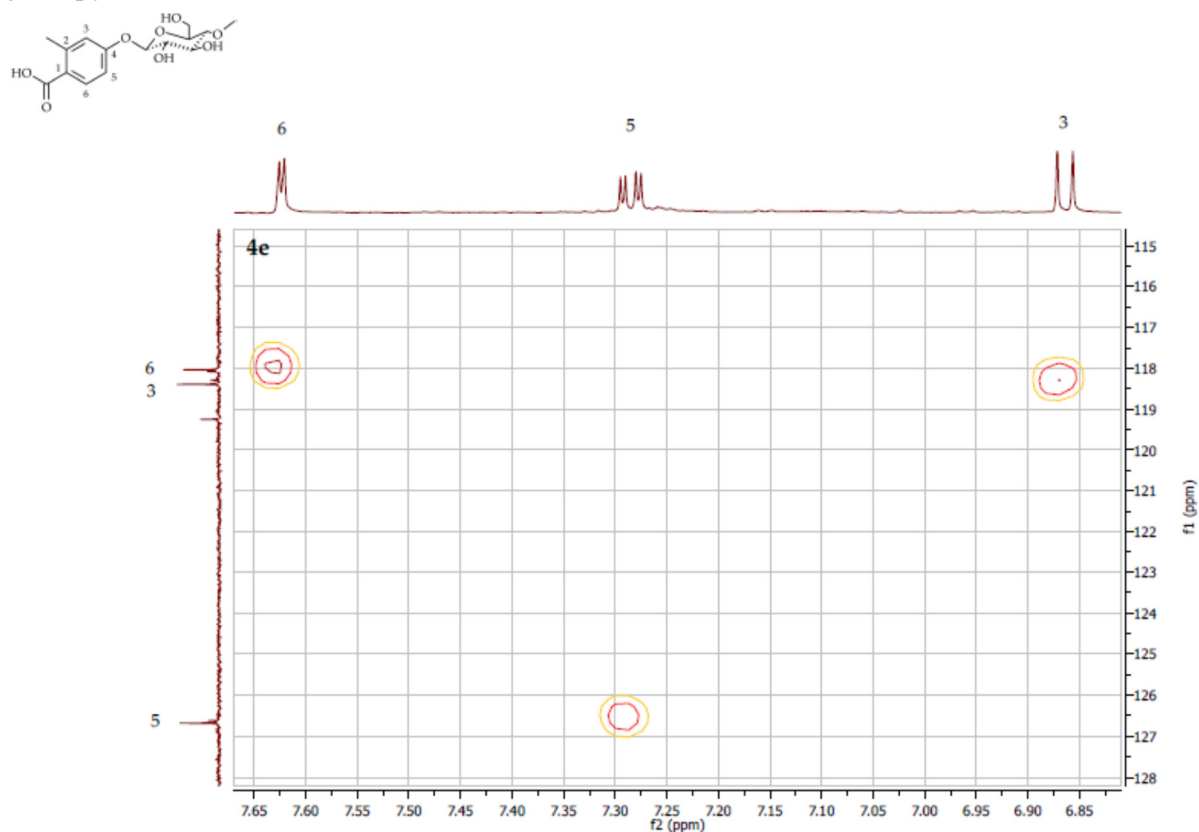

**Figure S100.** HSQC contour map –  $^1\text{H} \times ^{13}\text{C}$  expansion of 2-methylbenzoic acid 4-O- $\beta$ -D-(4'-O-methyl)-glucopyranoside (**4e**)



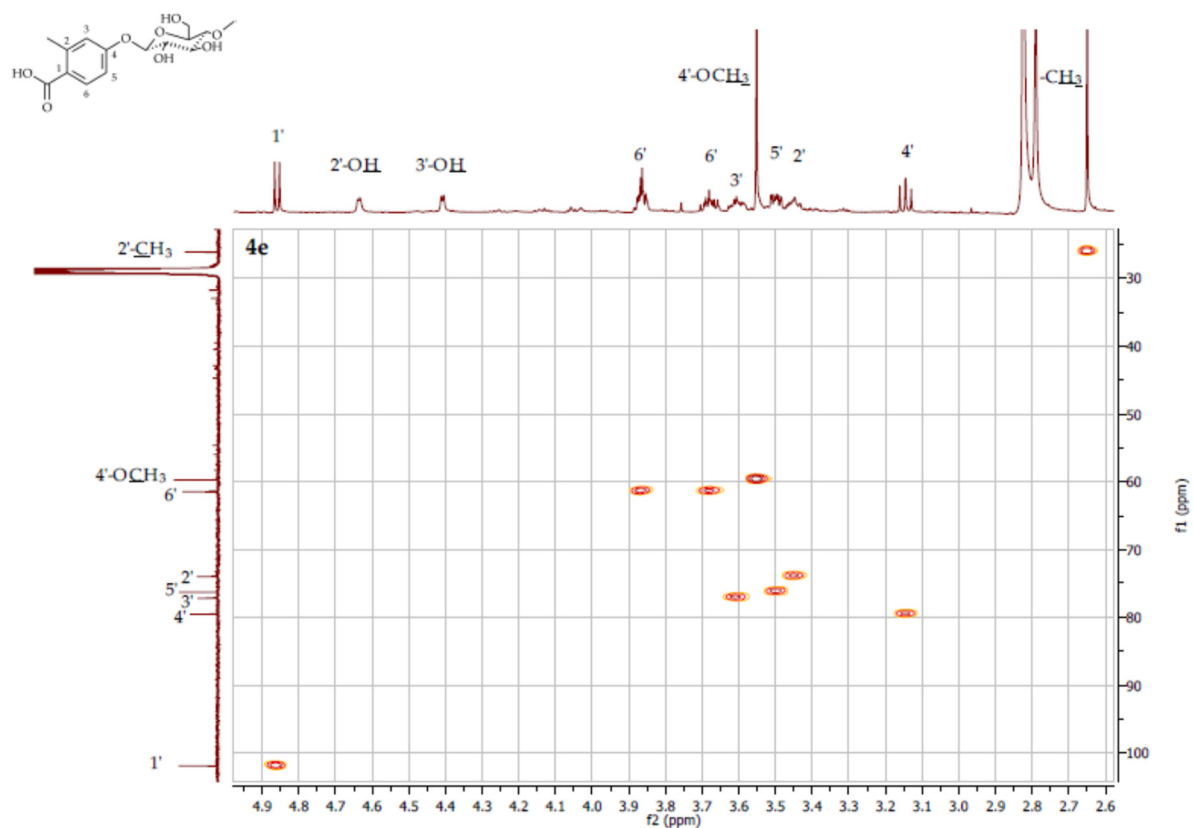

**Figure S101.** HSQC contour map – <sup>1</sup>H x <sup>13</sup>C expansion of 2-methylbenzoic acid 4-O-β-D-(4'-O-methyl)-glucopyranoside (4e)

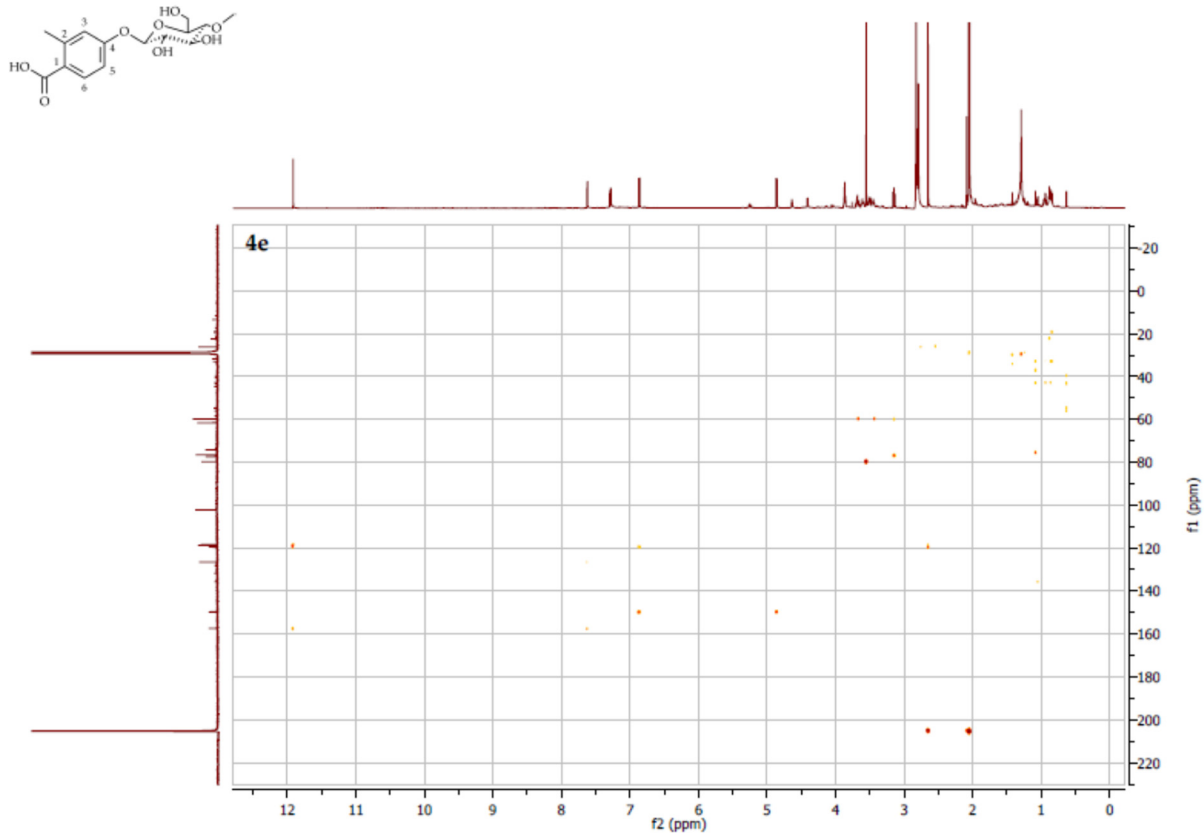

**Figure S102.** HMBC contour map – <sup>1</sup>H x <sup>13</sup>C of 2-methylbenzoic acid 4-O-β-D-(4'-O-methyl)-glucopyranoside (4e)

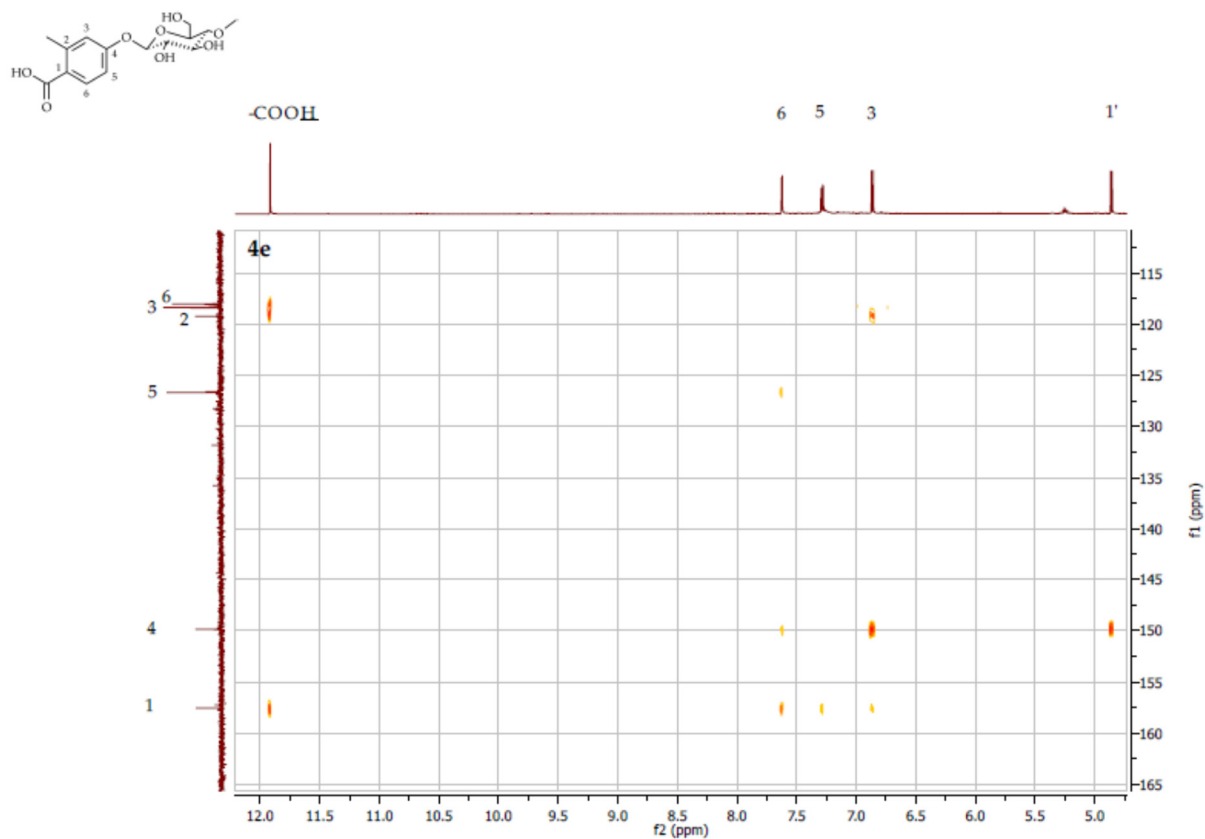

**Figure S103.** HMBC contour map –  $^1\text{H}$  x  $^{13}\text{C}$  expansion of 2-methylbenzoic acid 4-O- $\beta$ -D-(4'-O-methyl)-glucopyranoside (**4e**)

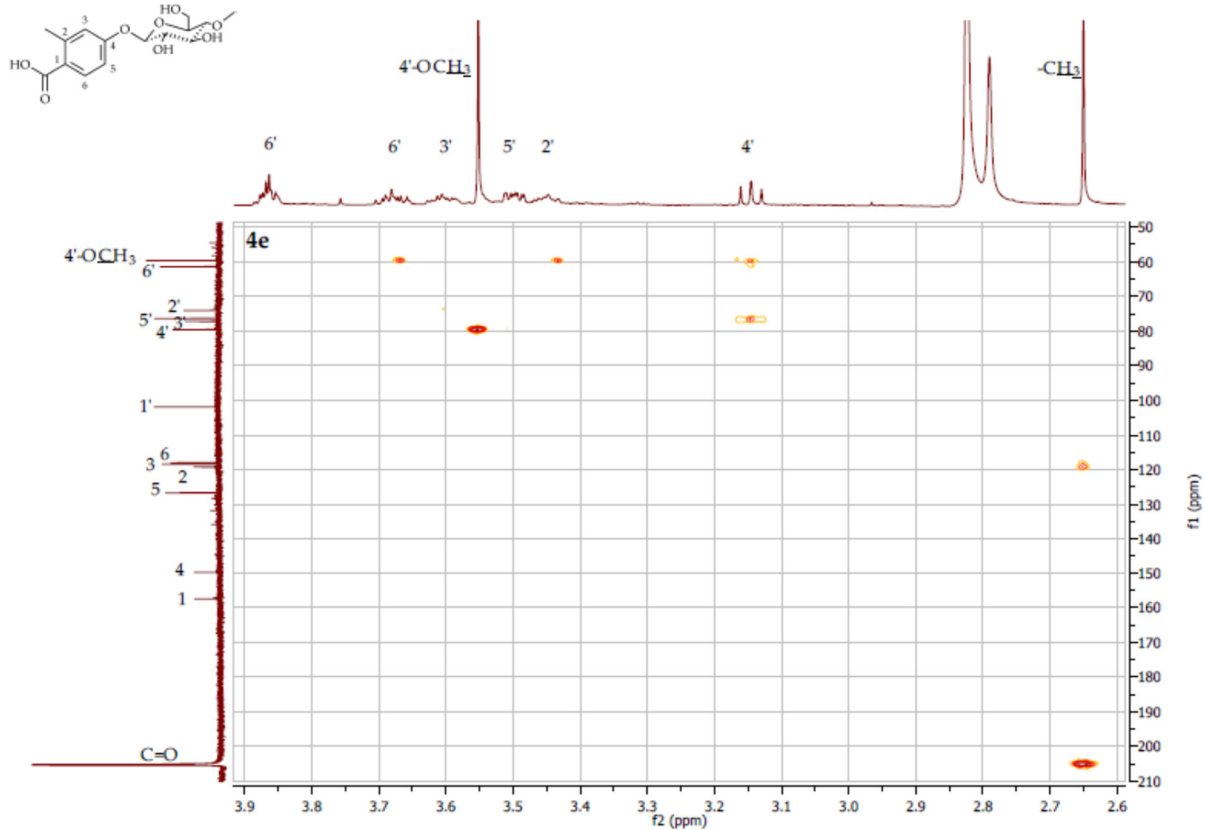

**Figure S104.** HMBC contour map –  $^1\text{H}$  x  $^{13}\text{C}$  expansion of 2-methylbenzoic acid 4-O- $\beta$ -D-(4'-O-methyl)-glucopyranoside (**4e**)

Molecular formula: C<sub>16</sub>H<sub>12</sub>O<sub>2</sub>

Formula weight: 236.08

Ionization mode: positive

Precursor: [M + H]<sup>+</sup> 237.10

237.1000>65.0500 CE: -51.0

237.1000>121.0500 CE: -31.0

237.1000>115.1000 CE: -39.0

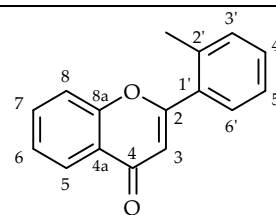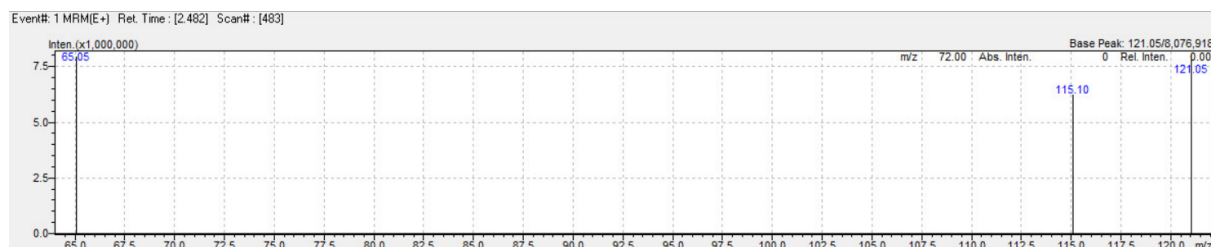

**Figure S105.** MS analysis of 2'-methylflavone (5)

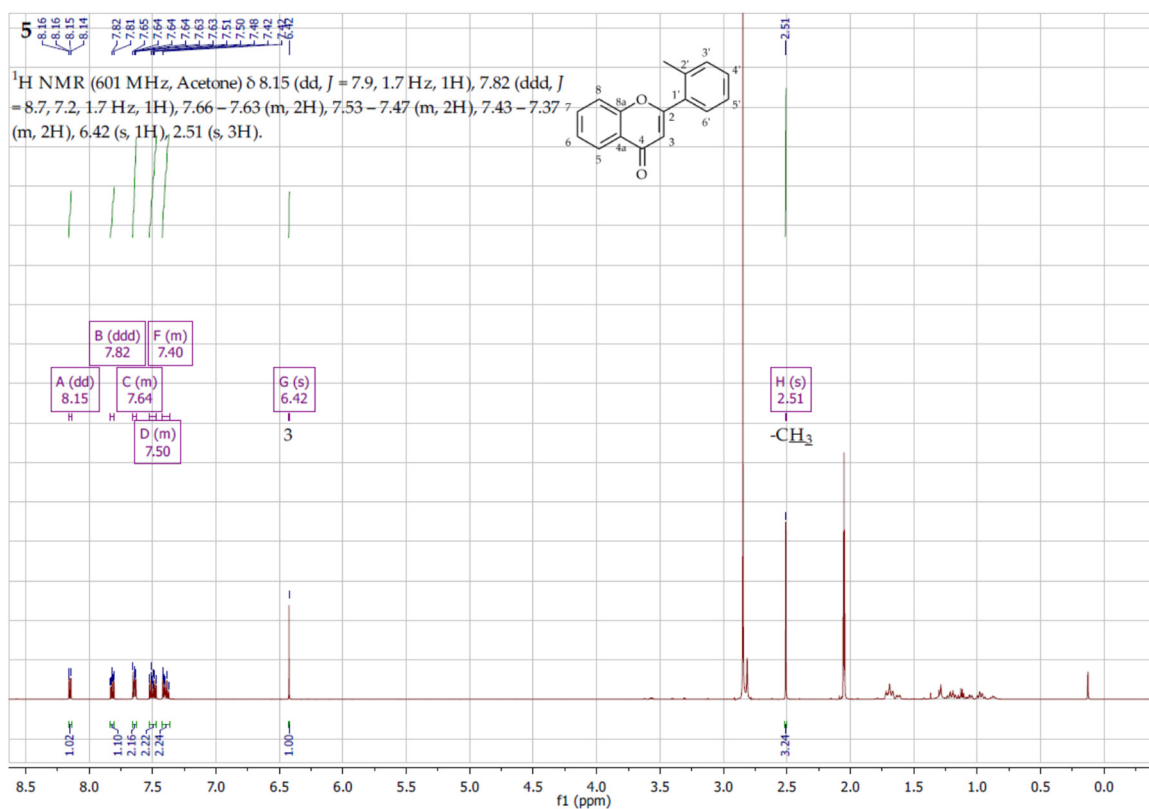

**Figure S106.** <sup>1</sup>H NMR spectrum (δ, acetone-d<sub>6</sub>, 600 MHz) of 2'-methylflavone (5)

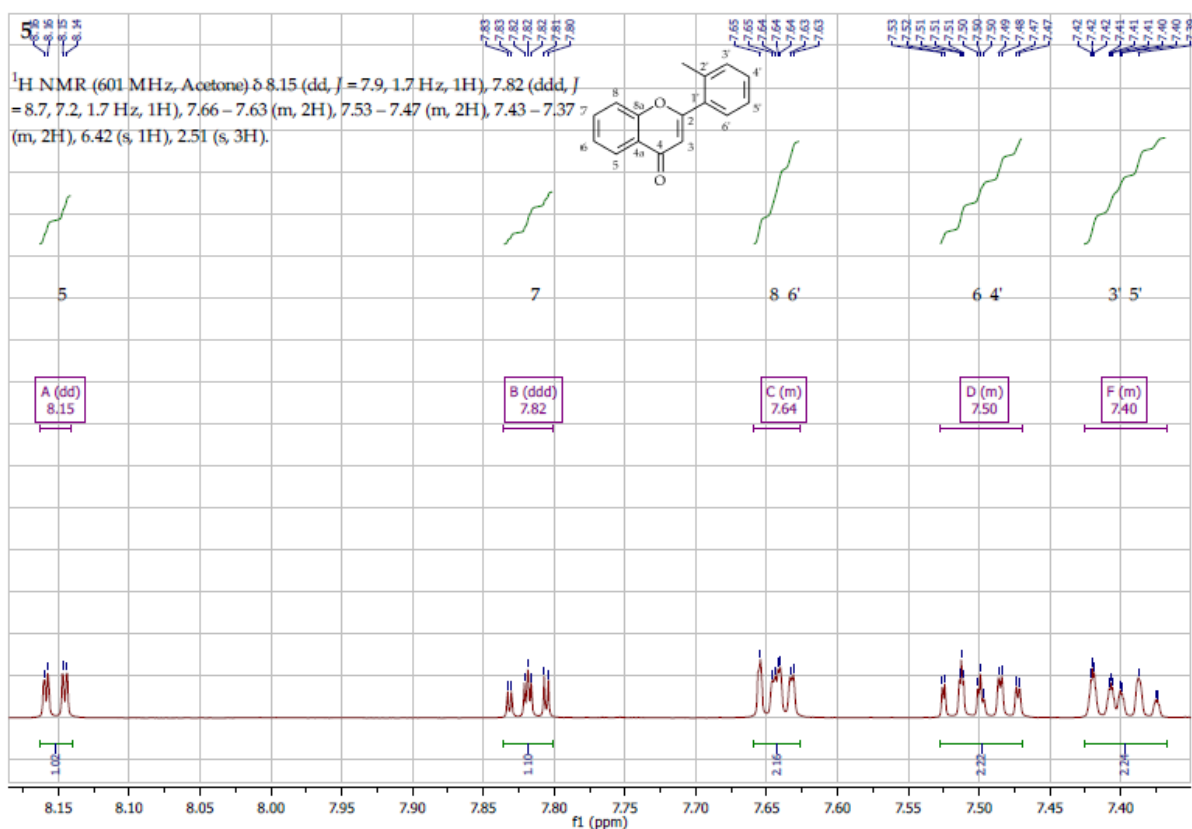

**Figure S107.** <sup>1</sup>H NMR spectrum expansion (δ, acetone-d<sub>6</sub>, 600 MHz) 2'-methylflavone (**5**)

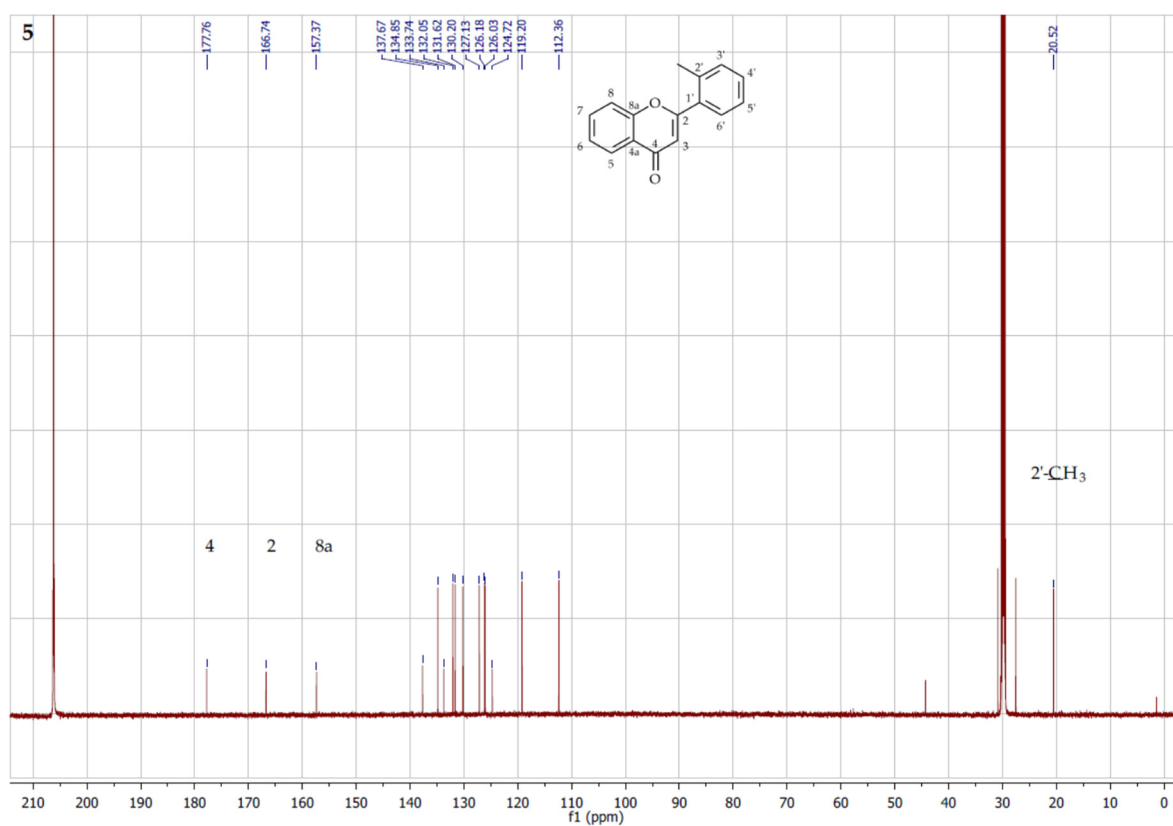

**Figure S108.** <sup>13</sup>C NMR spectrum (δ, acetone-d<sub>6</sub>, 151 MHz) of 2'-methylflavone (**5**)

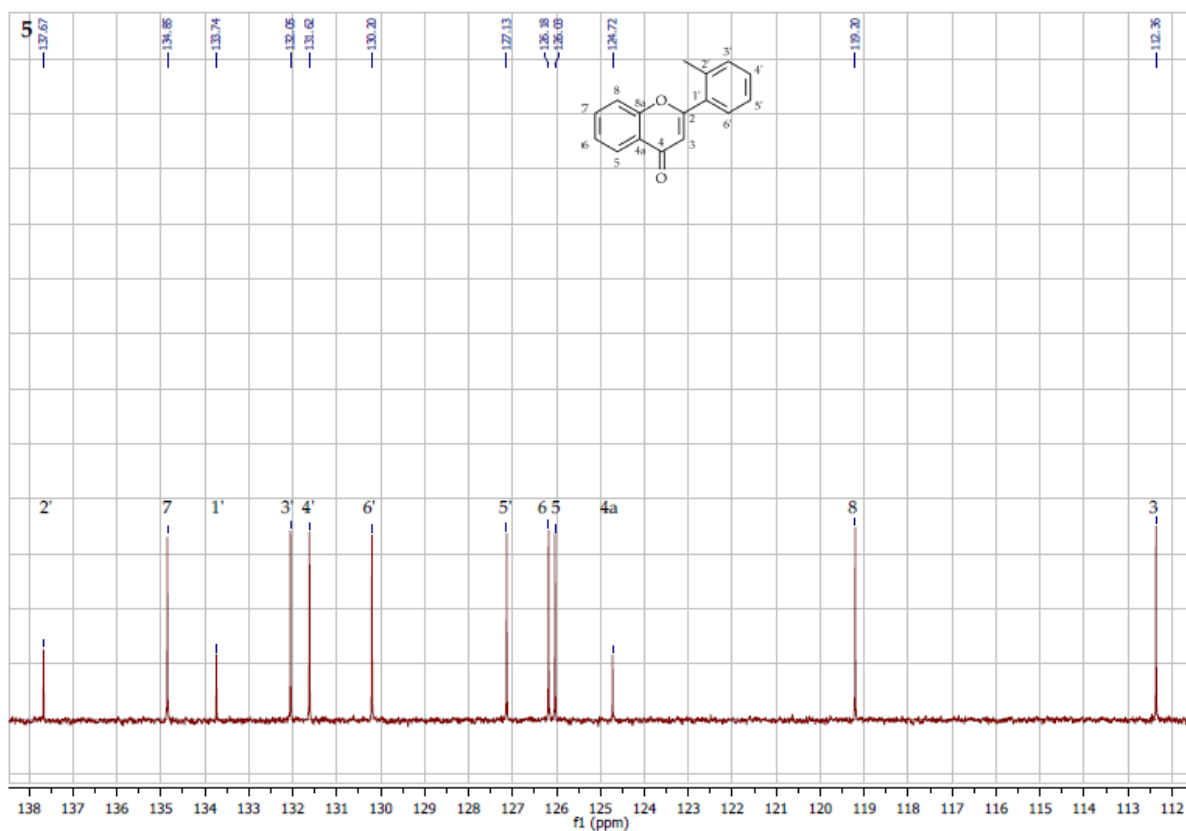

**Figure S109.**  $^{13}\text{C}$  NMR spectrum expansion ( $\delta$ , acetone- $\text{d}_6$ , 151 MHz) of 2'-methylflavone (**5**)

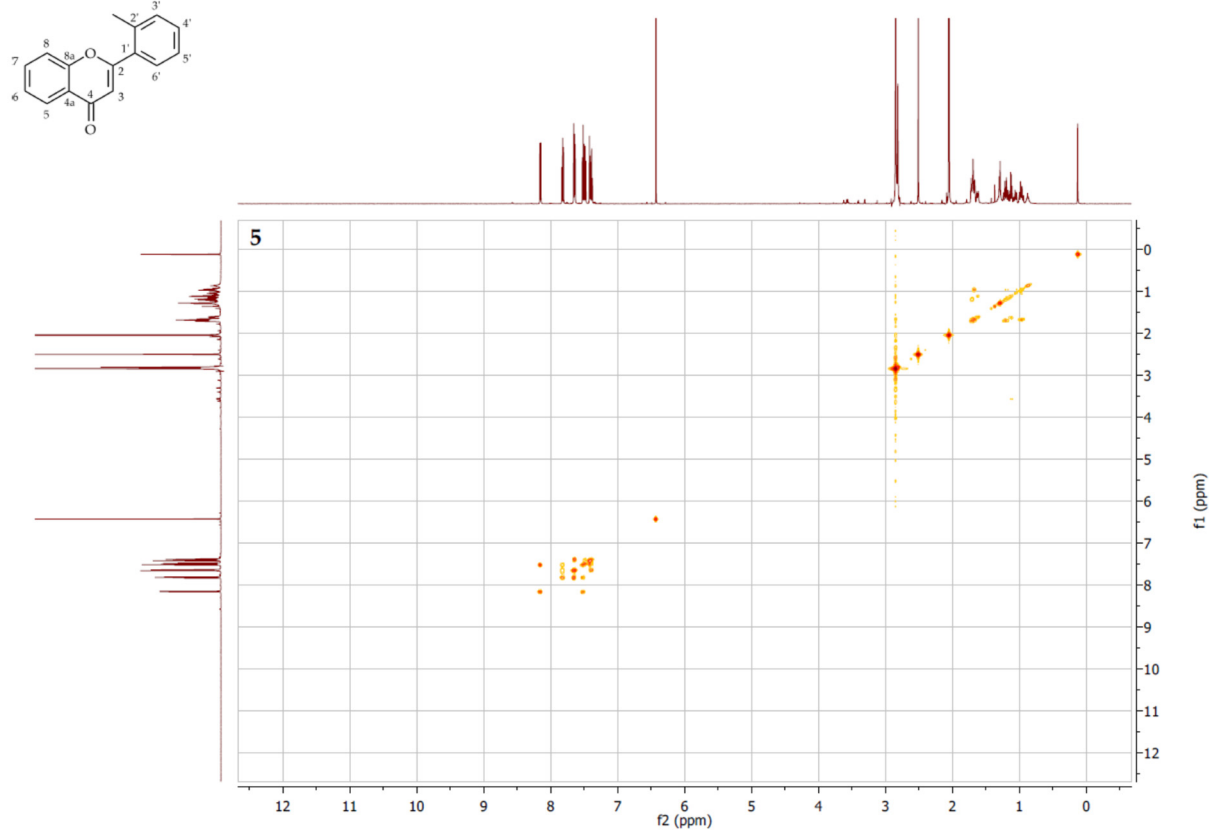

**Figure S110.** COSY contour map –  $^1\text{H} \times ^1\text{H}$  of 2'-methylflavone (**5**)

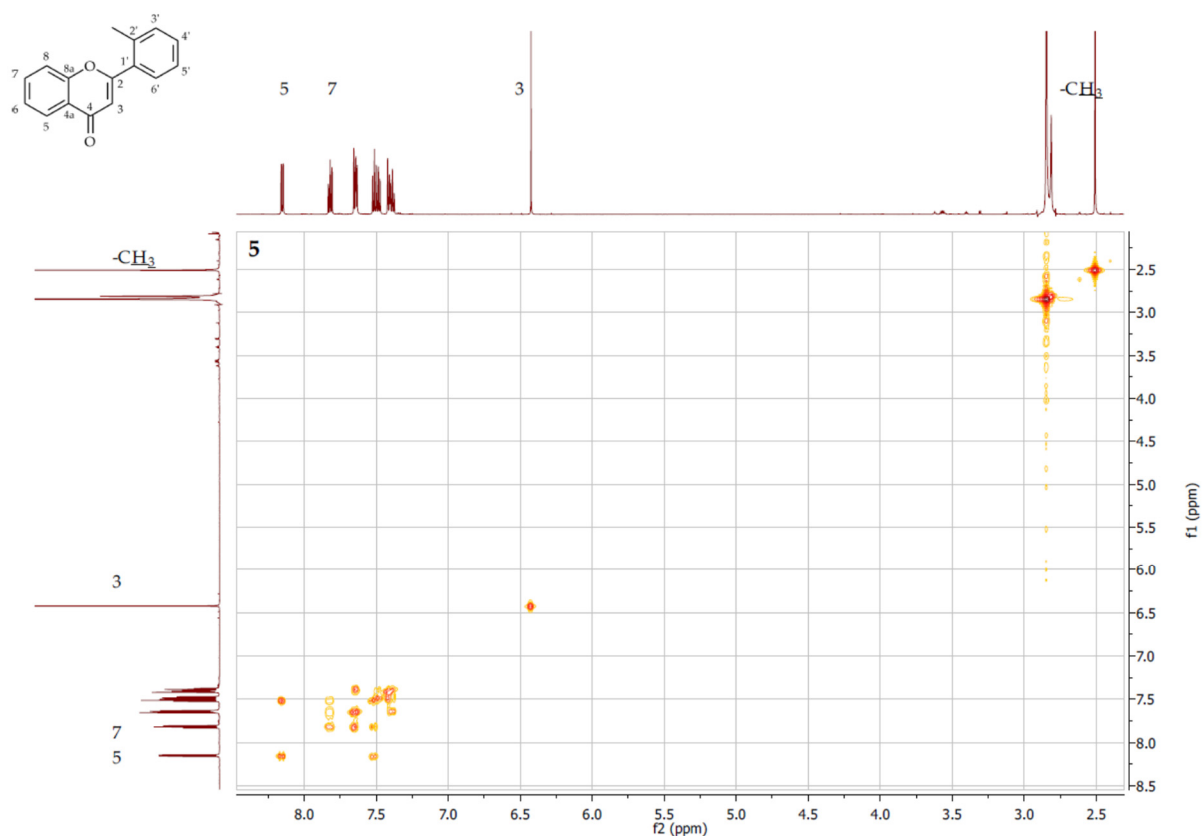

**Figure S111.** COSY contour map – <sup>1</sup>H x <sup>1</sup>H expansion of 2'-methylflavone (5)

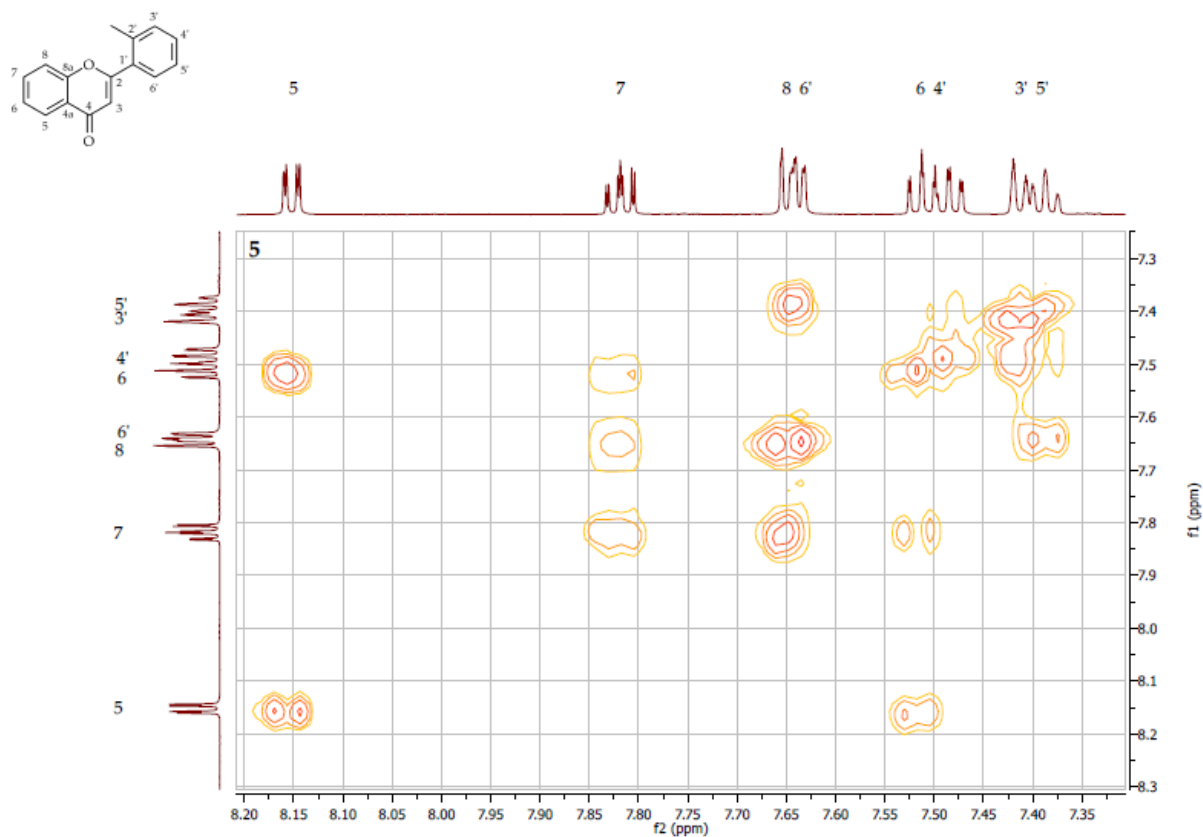

**Figure S112.** COSY contour map – <sup>1</sup>H x <sup>1</sup>H expansion of 2'-methylflavone (5)

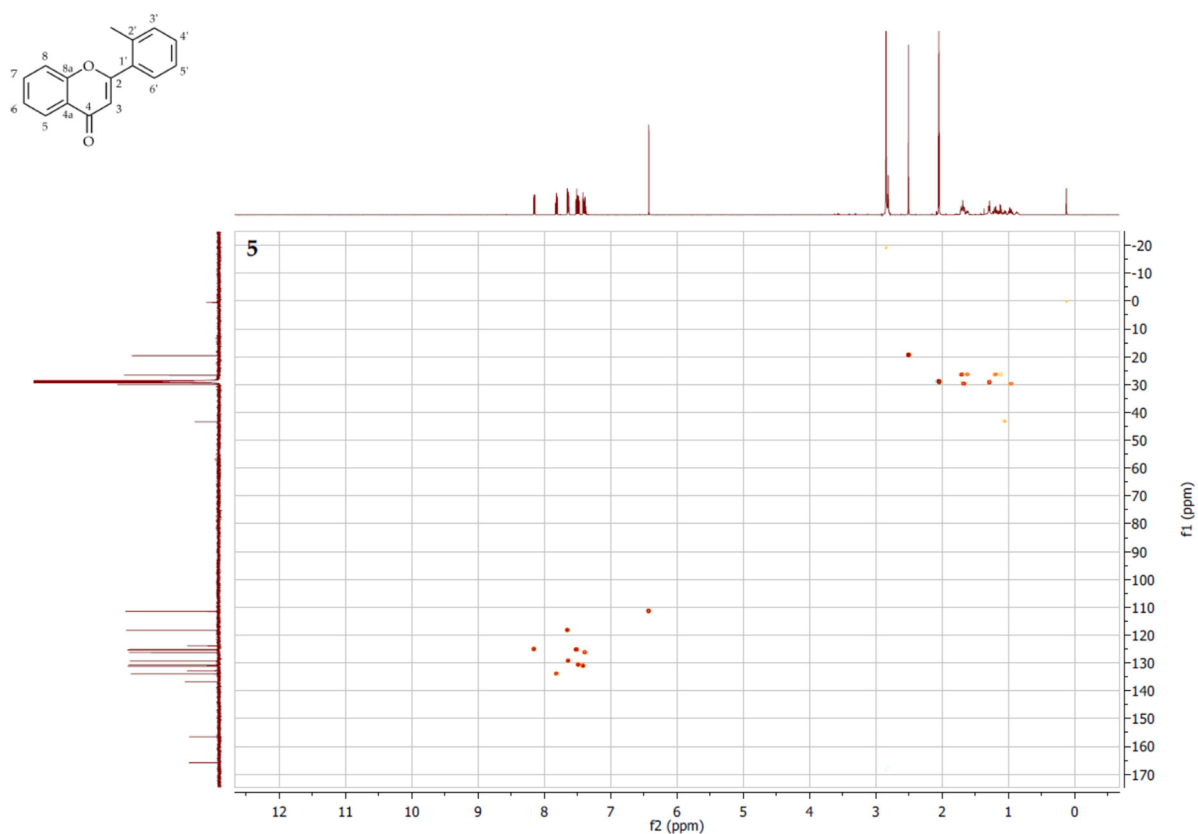

**Figure S113.** HSQC contour map –  $^1\text{H} \times ^{13}\text{C}$  of 2'-methylflavone (5)

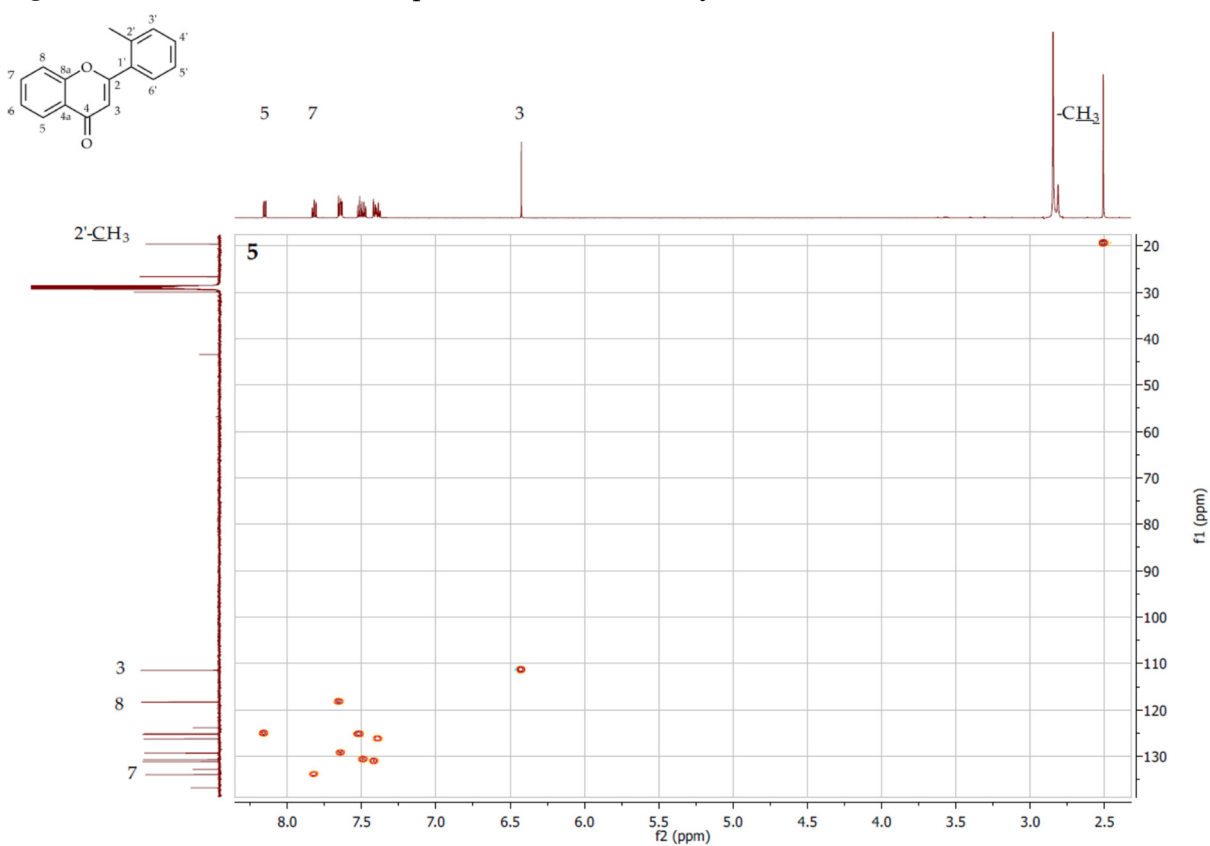

**Figure S114.** HSQC contour map –  $^1\text{H} \times ^{13}\text{C}$  expansion of 2'-methylflavone (5)

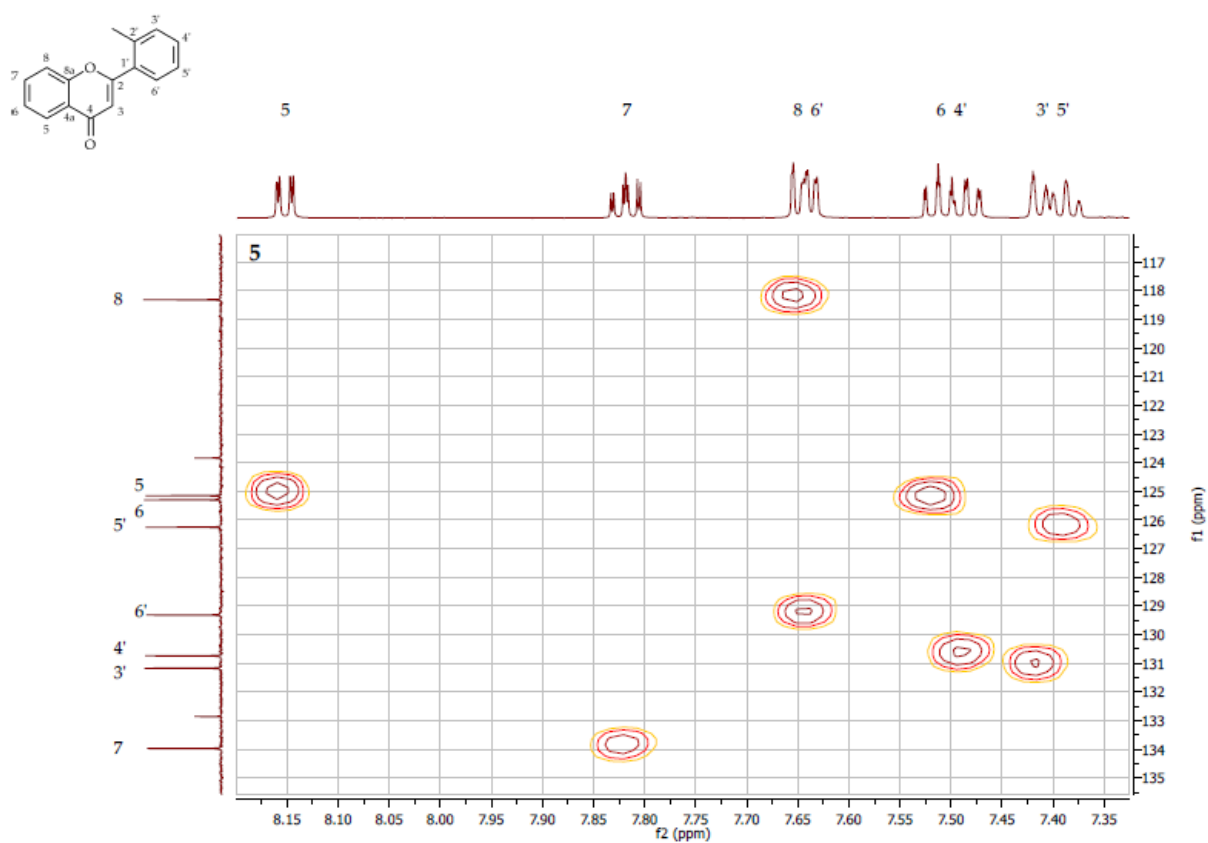

Figure S115. HSQC contour map –  $^1\text{H} \times ^{13}\text{C}$  expansion of 2'-methylflavone (5)

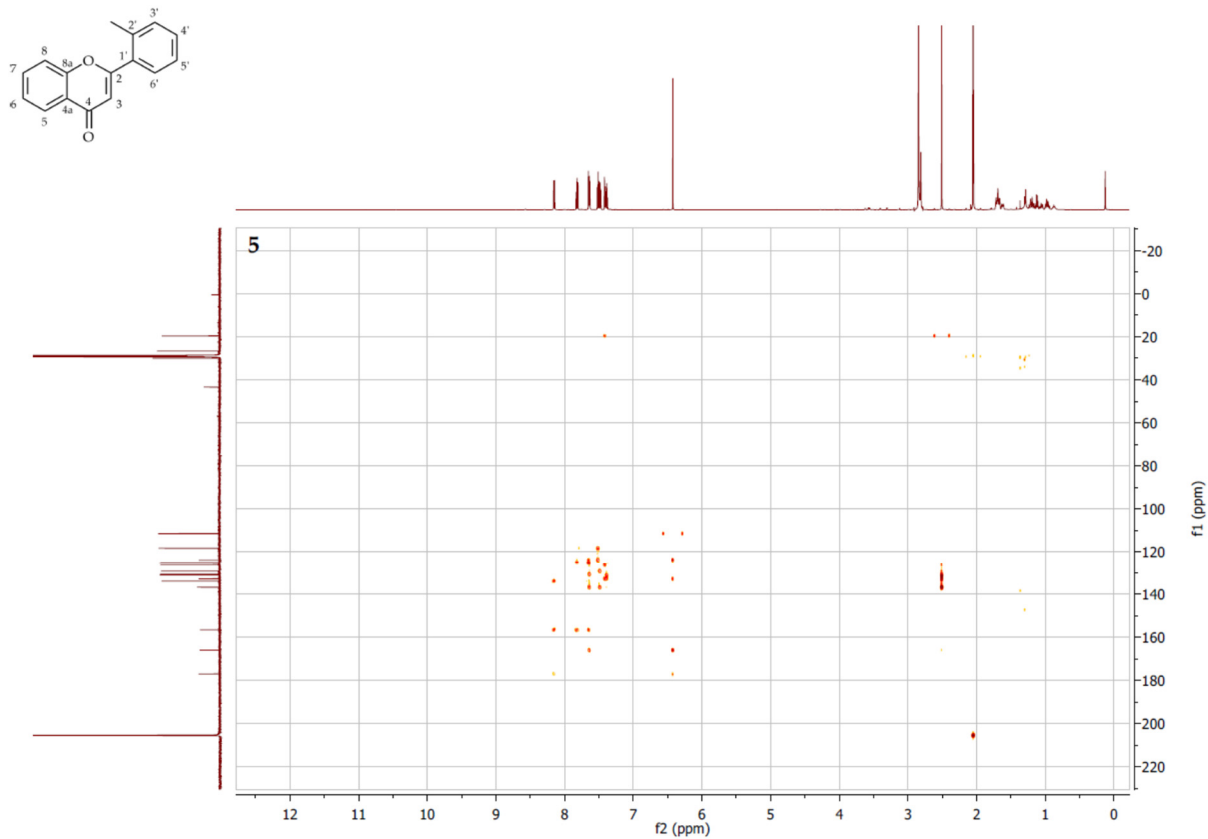

Figure S116. HMBC contour map –  $^1\text{H} \times ^{13}\text{C}$  of 2'-methylflavone (5)



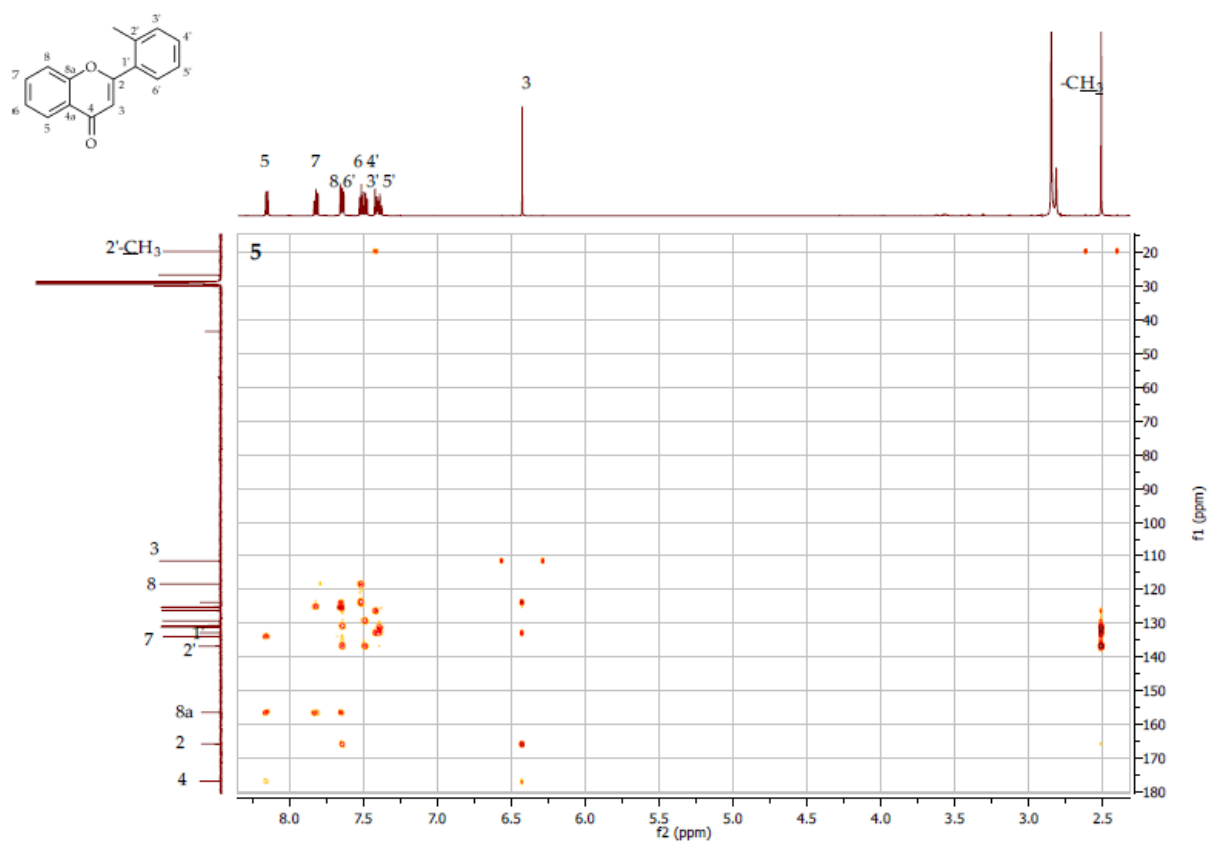

**Figure S117.** HMBC contour map –  $^1\text{H} \times ^{13}\text{C}$  expansion of 2'-methylflavone (5)

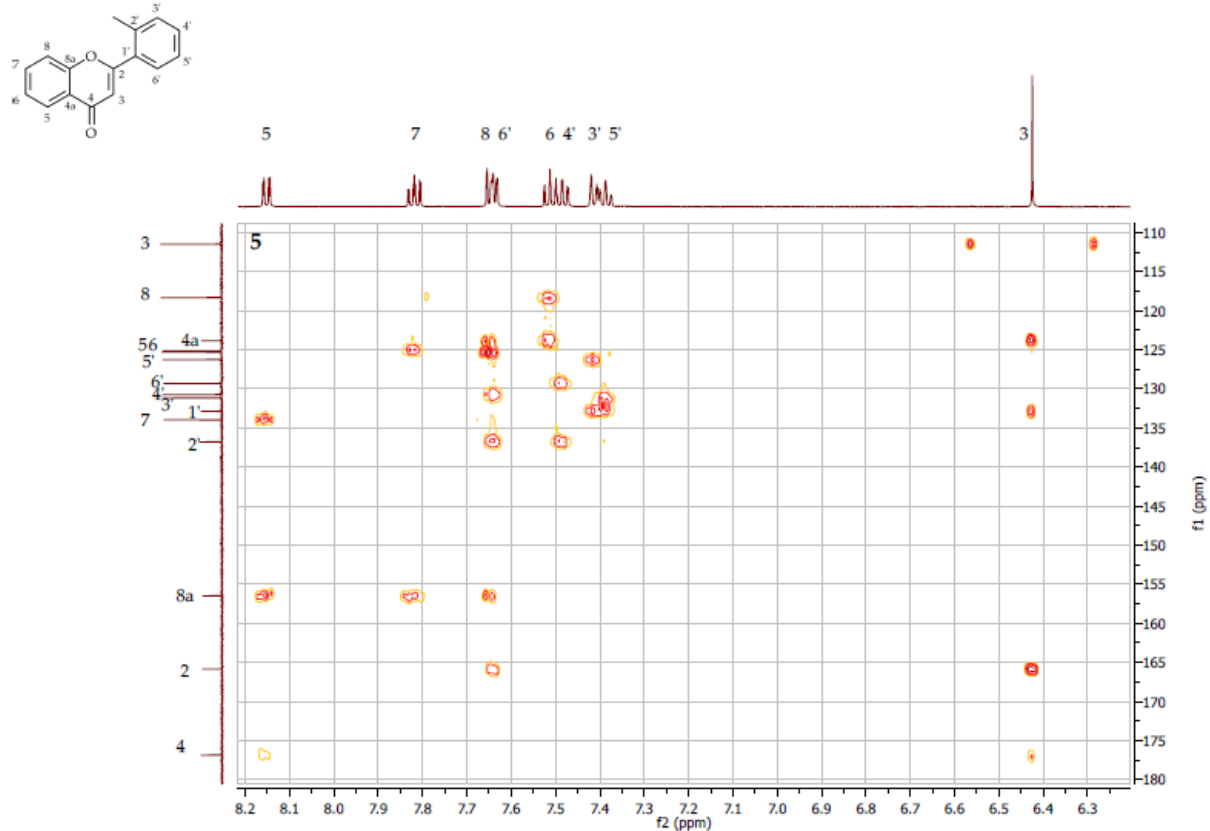

**Figure S118.** HMBC contour map –  $^1\text{H} \times ^{13}\text{C}$  expansion of 2'-methylflavone (5)

Molecular formula: C<sub>23</sub>H<sub>24</sub>O<sub>8</sub>

Formula weight: 428.15

Ionization mode: positive

Precursor: [M + H]<sup>+</sup> 429.10

429.1000>253.0500 CE: -31.0

429.1000>121.0500 CE: -55.0

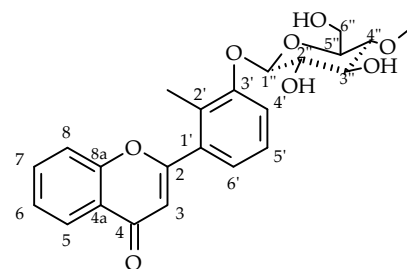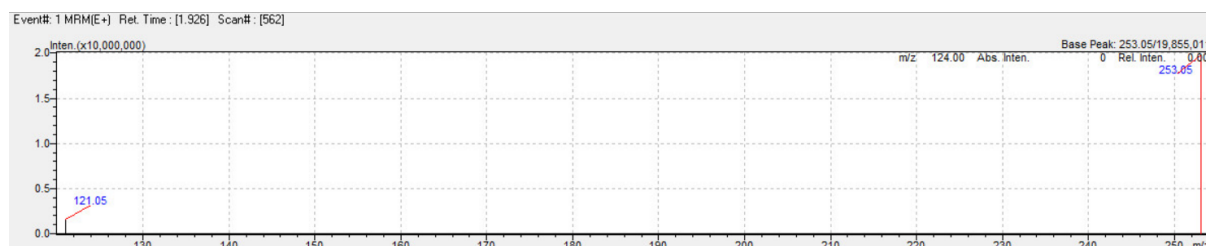

**Figure S119.** MS analysis of 2'-methylflavone 3'-O- $\beta$ -D-(4''-O-methyl)-glucopyranoside (**5a**)

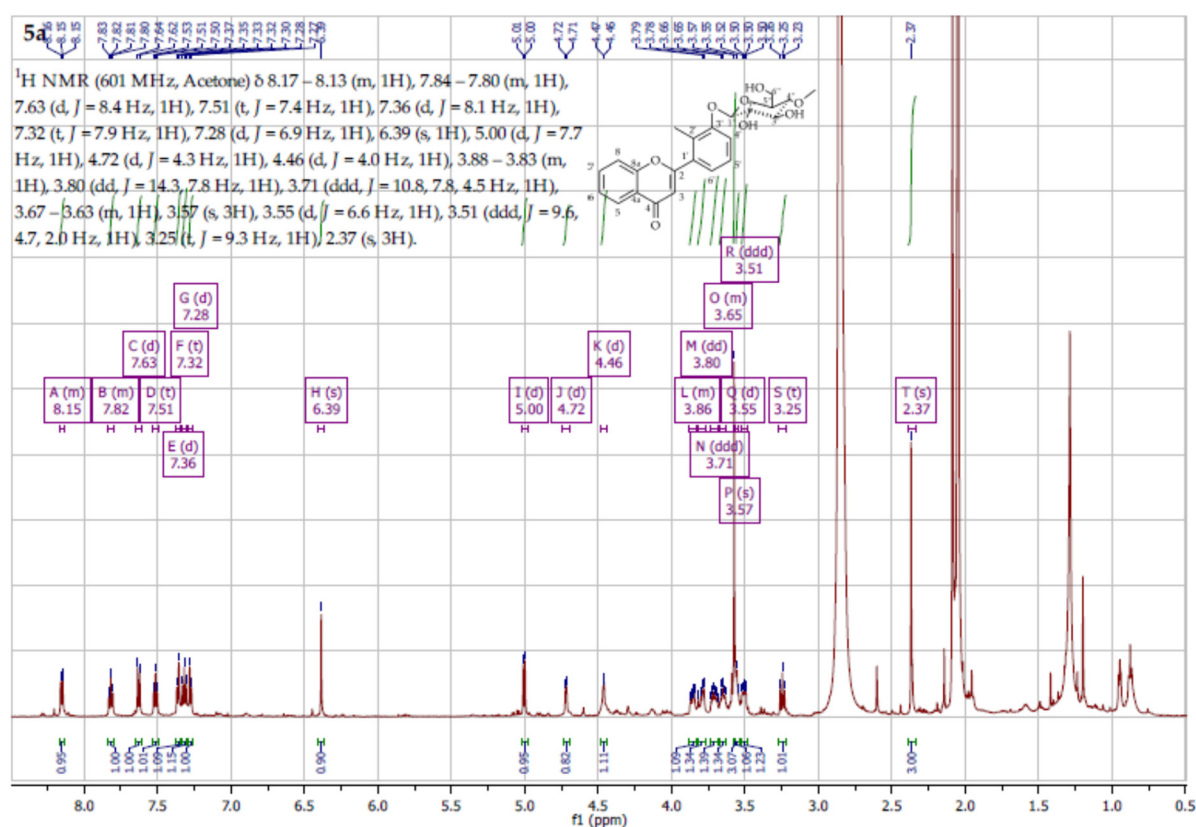

**Figure S120.** <sup>1</sup>H NMR spectrum ( $\delta$ , acetone-d<sub>6</sub>, 600 MHz) of 2'-methylflavone 3'-O- $\beta$ -D-(4''-O-methyl)-glucopyranoside (**5a**)

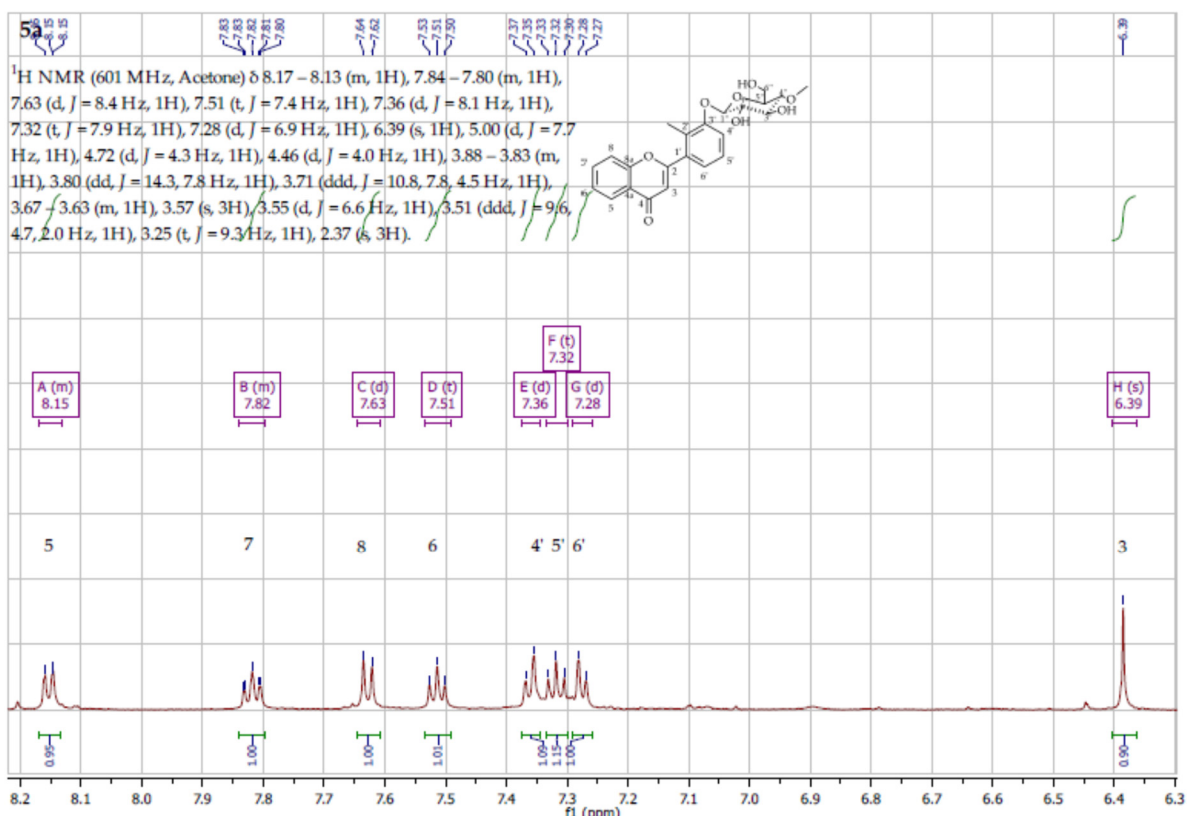

**Figure S121.** <sup>1</sup>H NMR spectrum expansion (δ, acetone-d<sub>6</sub>, 600 MHz) of 2'-methylflavone 3'-O-β-D-(4''-O-methyl)-glucopyranoside (**5a**)

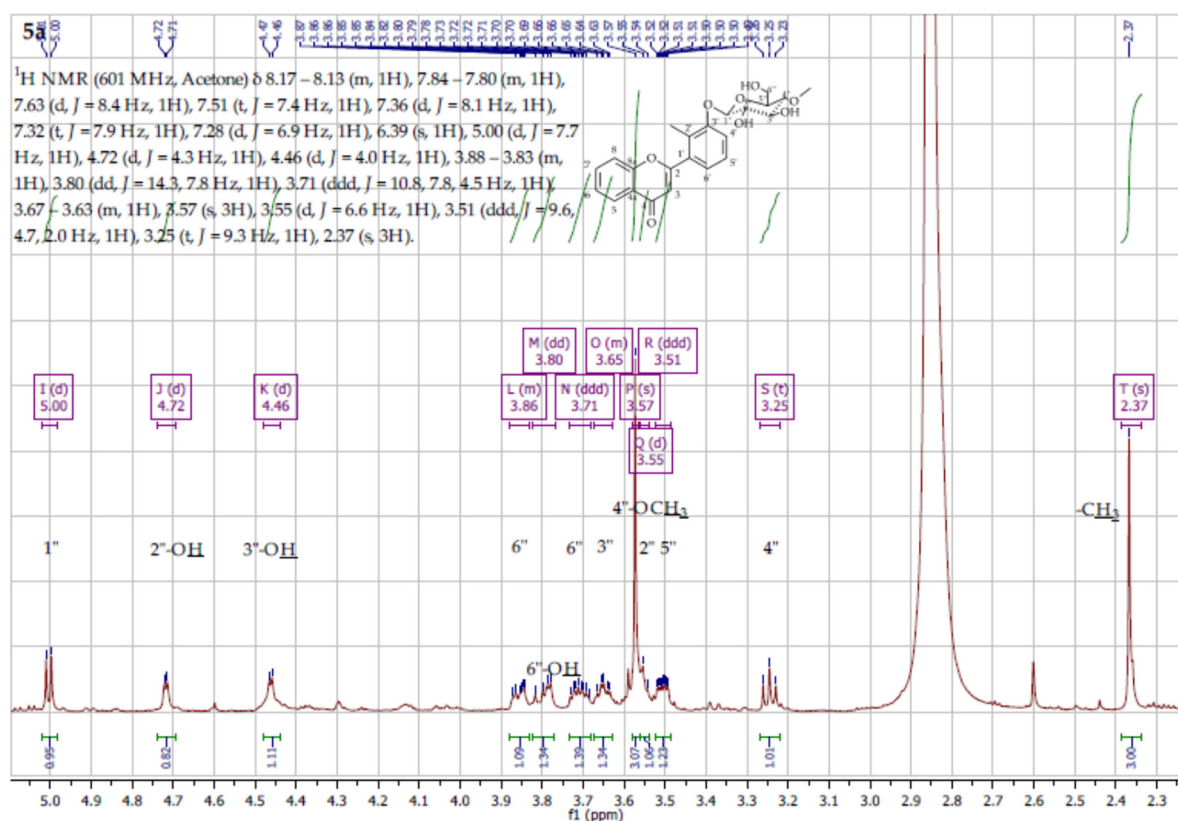

**Figure S122.** <sup>1</sup>H NMR spectrum expansion (δ, acetone-d<sub>6</sub>, 600 MHz) of 2'-methylflavone 3'-O-β-D-(4''-O-methyl)-glucopyranoside (**5a**)

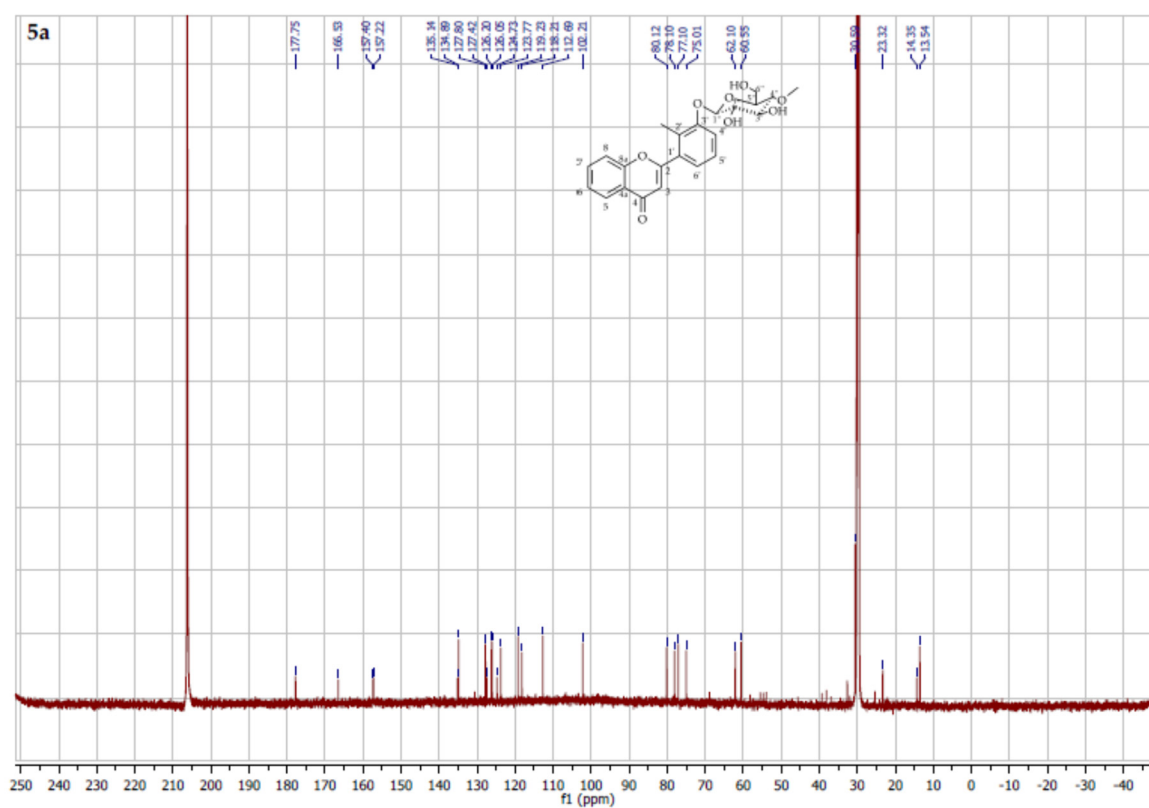

**Figure S123.**  $^{13}\text{C}$  NMR spectrum ( $\delta$ , acetone- $d_6$ , 151 MHz) of 2'-methylflavone 3'-O- $\beta$ -D-(4''-O-methyl)-glucopyranoside (5a)

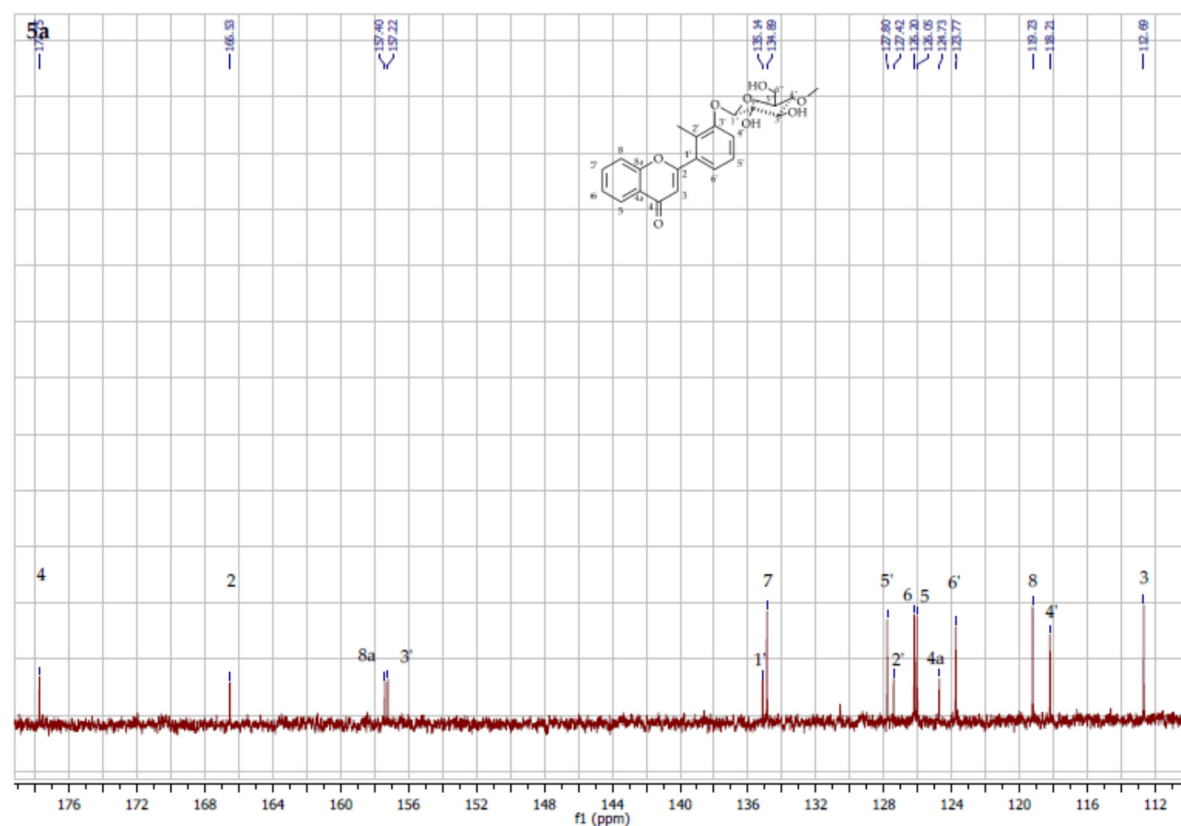

**Figure S124.**  $^{13}\text{C}$  NMR spectrum expansion ( $\delta$ , acetone- $d_6$ , 151 MHz) of 2'-methylflavone 3'-O- $\beta$ -D-(4''-O-methyl)-glucopyranoside (5a)

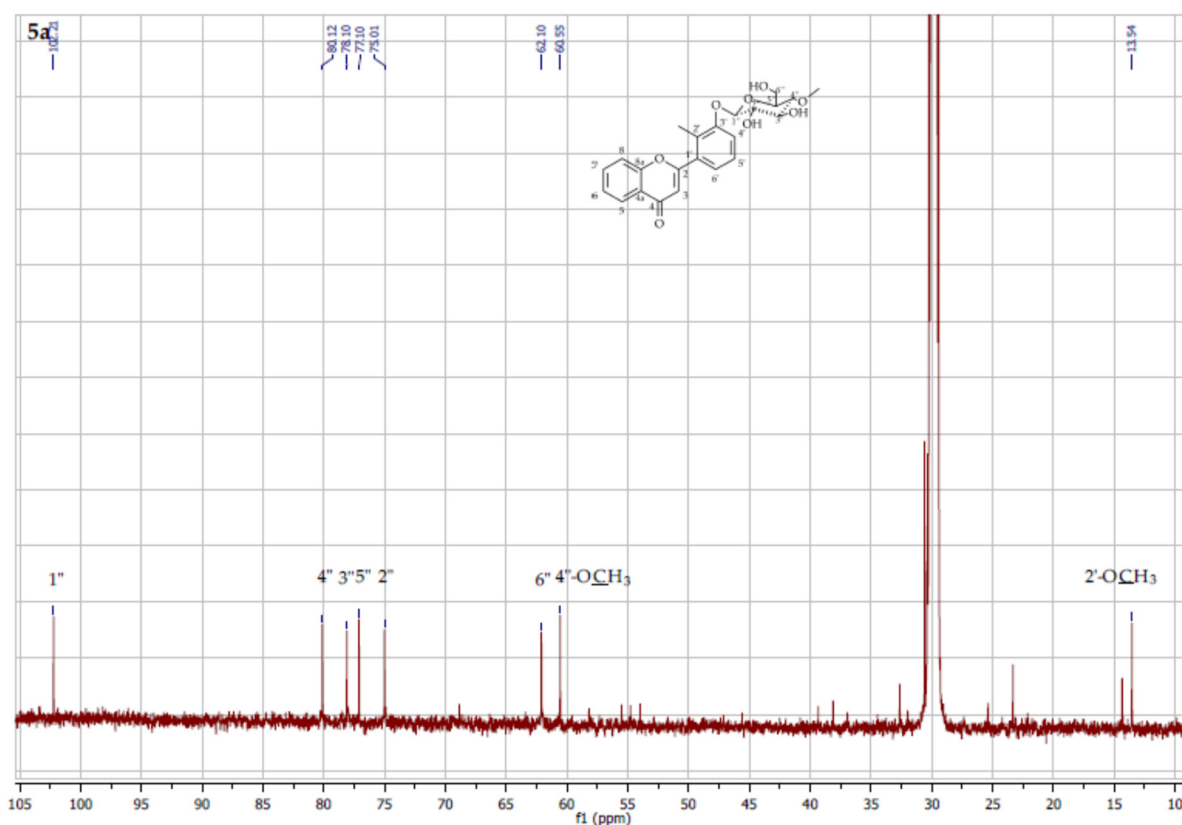

**Figure S125.**  $^{13}\text{C}$  NMR spectrum expansion ( $\delta$ , acetone- $d_6$ , 151 MHz) of 2'-methylflavone 3'- $O$ - $\beta$ -D-(4''- $O$ -methyl)-glucopyranoside (**5a**)

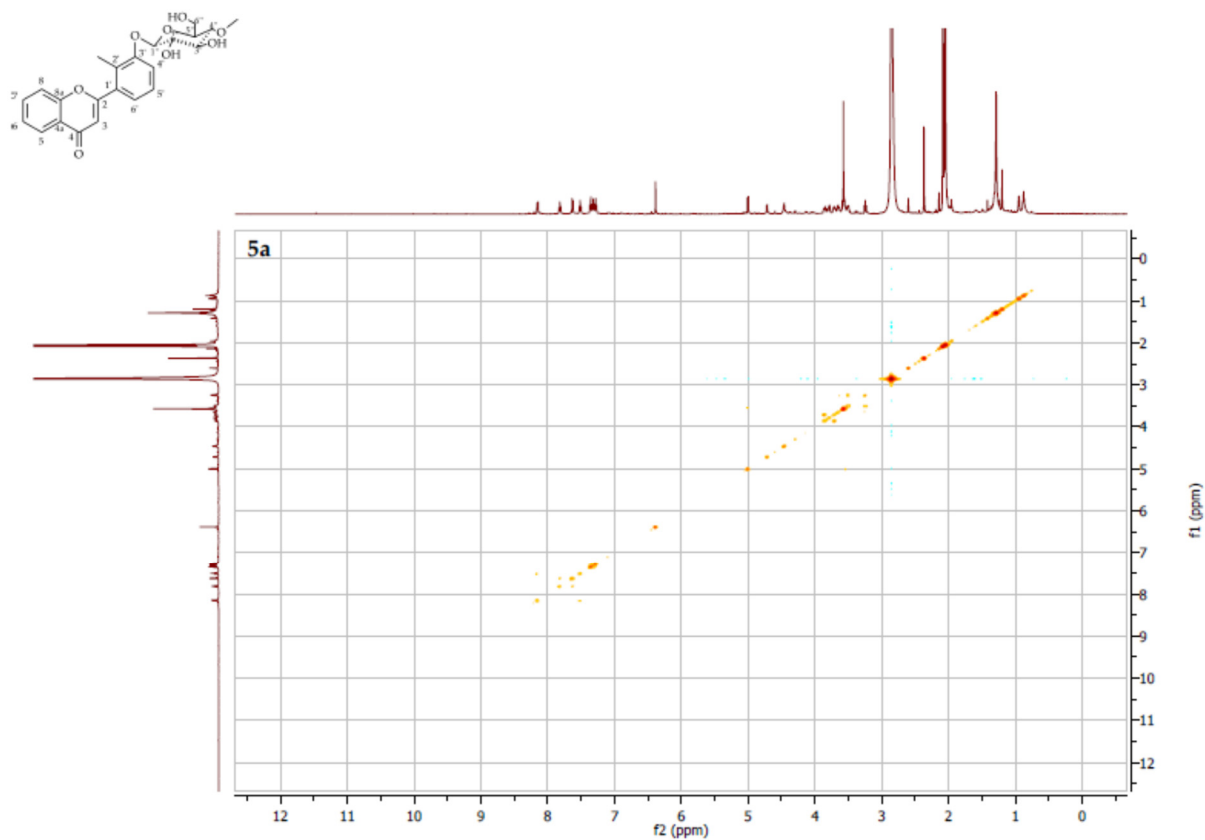

**Figure S126.** COSY contour map –  $^1\text{H} \times ^1\text{H}$  of 2'-methylflavone 3'- $O$ - $\beta$ -D-(4''- $O$ -methyl)-glucopyranoside (**5a**)

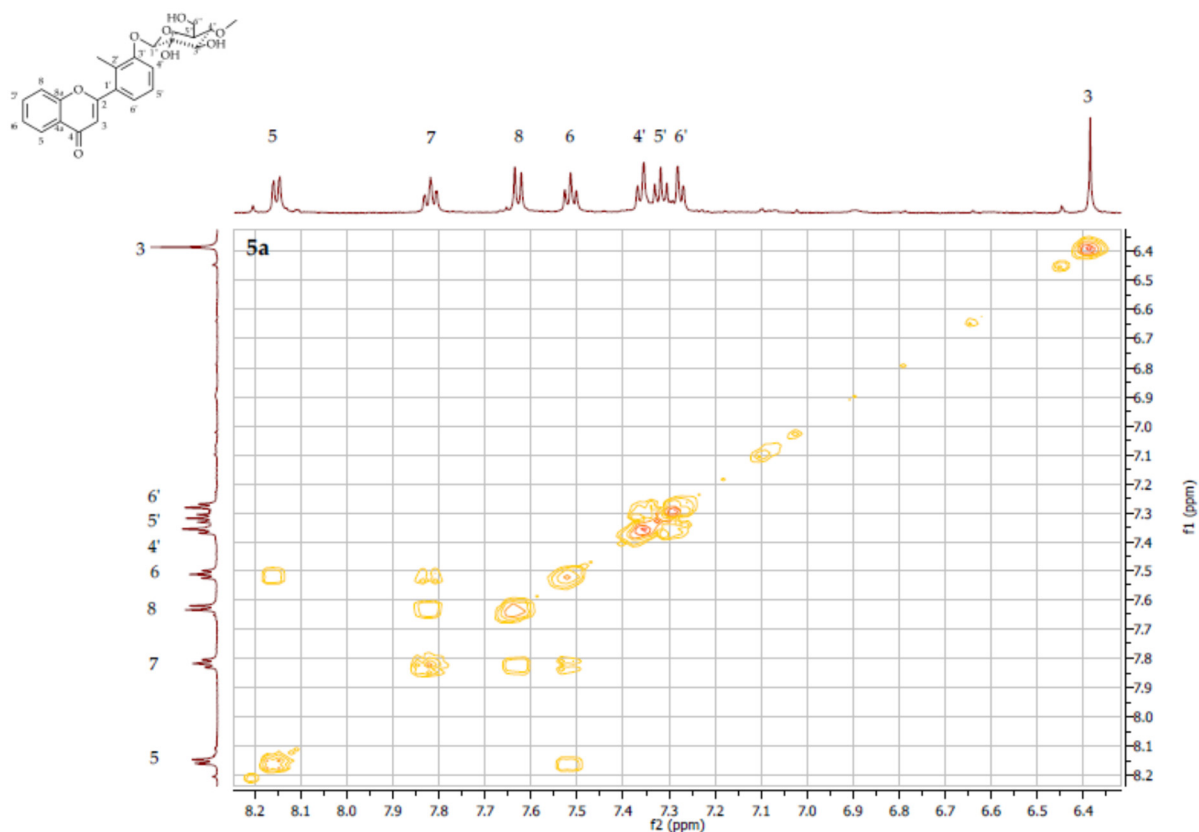

**Figure S127.** COSY contour map –  $^1\text{H} \times ^1\text{H}$  expansion of 2'-methylflavone 3'-O- $\beta$ -D-(4''-O-methyl)-glucopyranoside (**5a**)

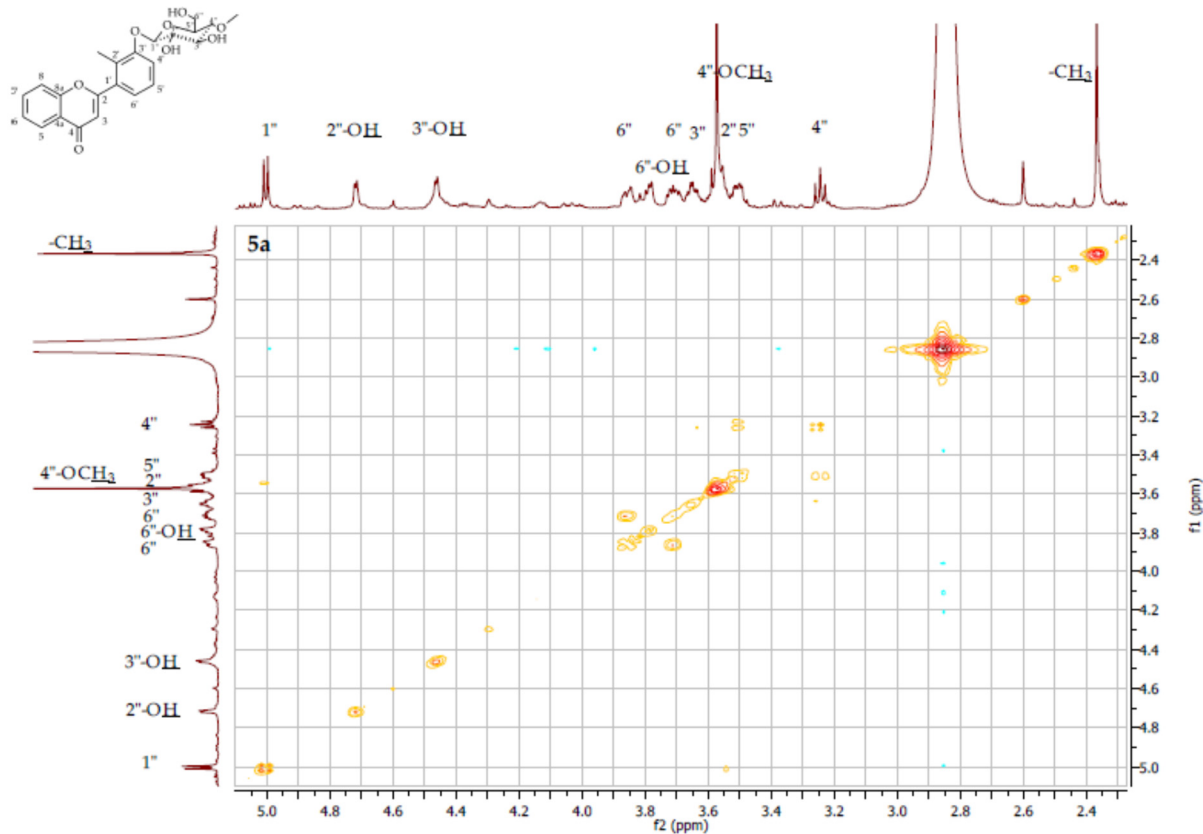

**Figure S128.** COSY contour map –  $^1\text{H} \times ^1\text{H}$  expansion of 2'-methylflavone 3'-O- $\beta$ -D-(4''-O-methyl)-glucopyranoside (**5a**)

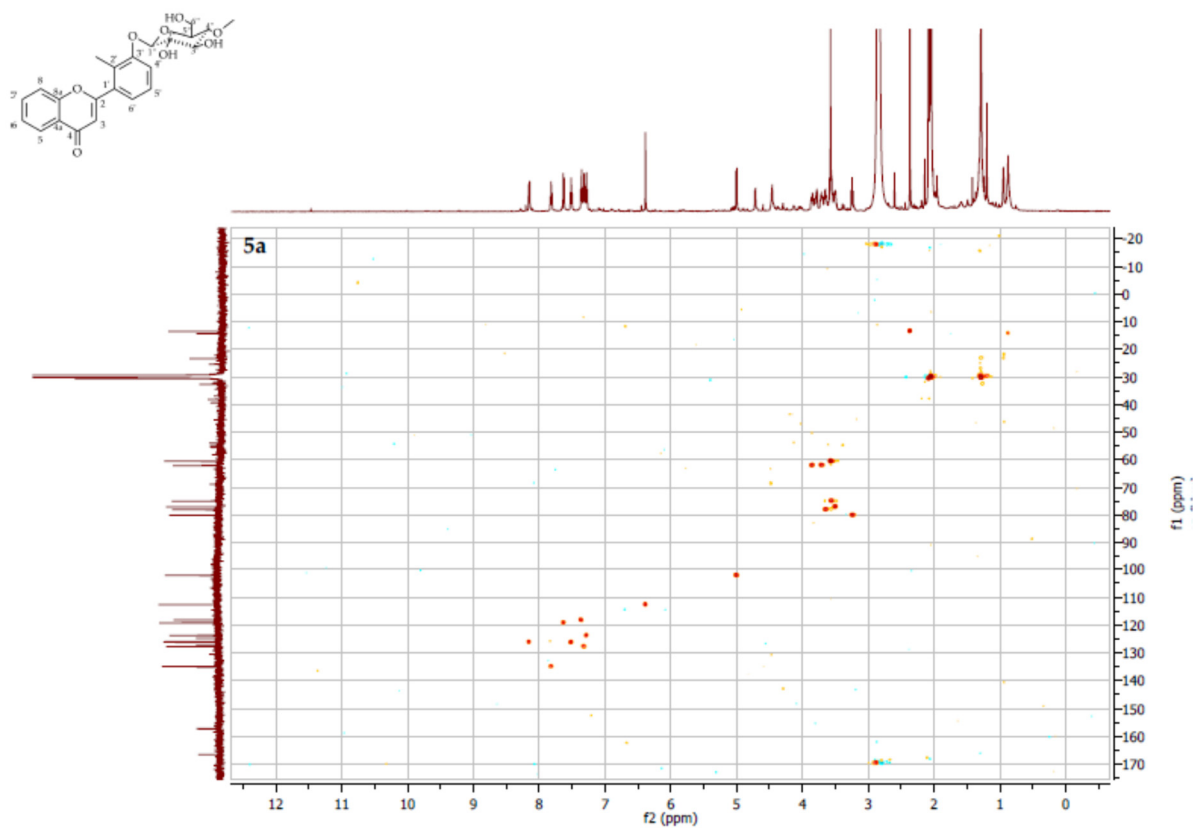

**Figure S129.** HSQC contour map –  $^1\text{H} \times ^{13}\text{C}$  of 2'-methylflavone 3'-O- $\beta$ -D-(4''-O-methyl)-glucopyranoside (**5a**)

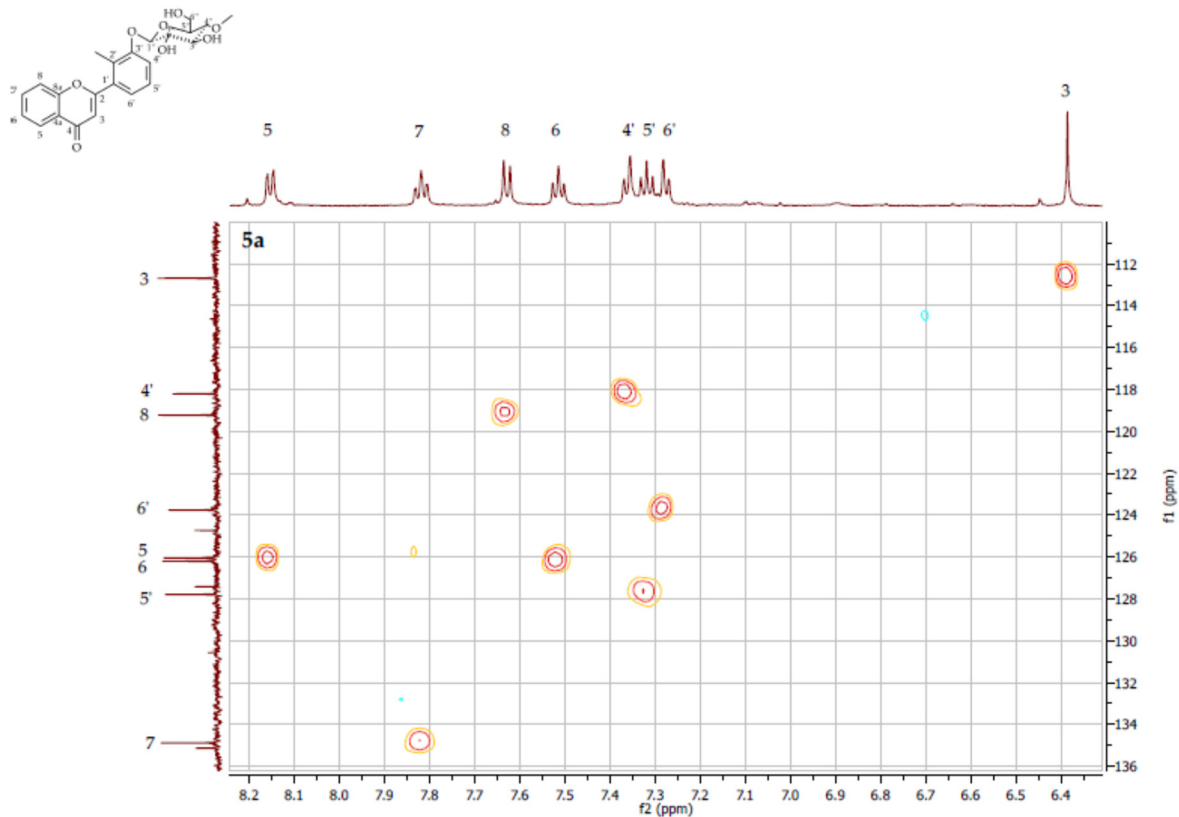

**Figure S130.** HSQC contour map –  $^1\text{H} \times ^{13}\text{C}$  expansion of 2'-methylflavone 3'-O- $\beta$ -D-(4''-O-methyl)-glucopyranoside (**5a**)



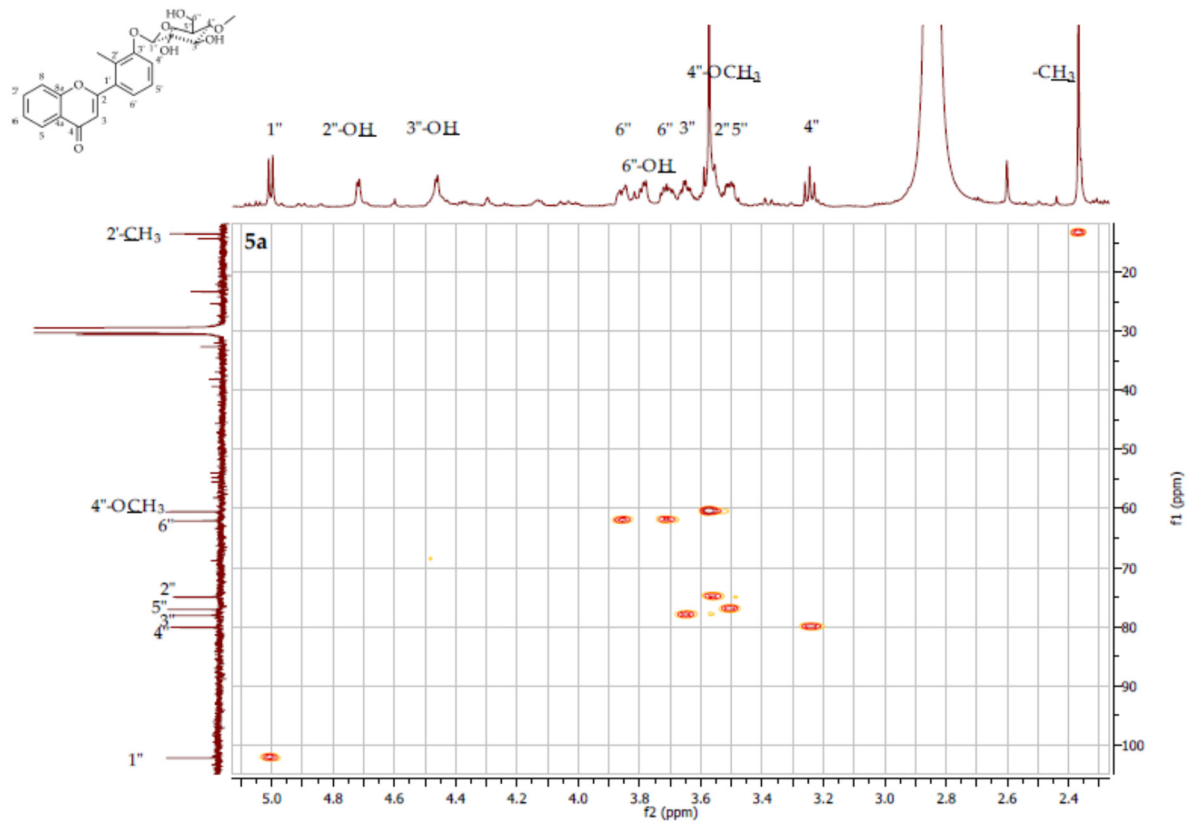

**Figure S131.** HSQC contour map –  $^1\text{H} \times ^{13}\text{C}$  expansion of 2'-methylflavone 3'-O- $\beta$ -D-(4''-O-methyl)-glucopyranoside (**5a**)

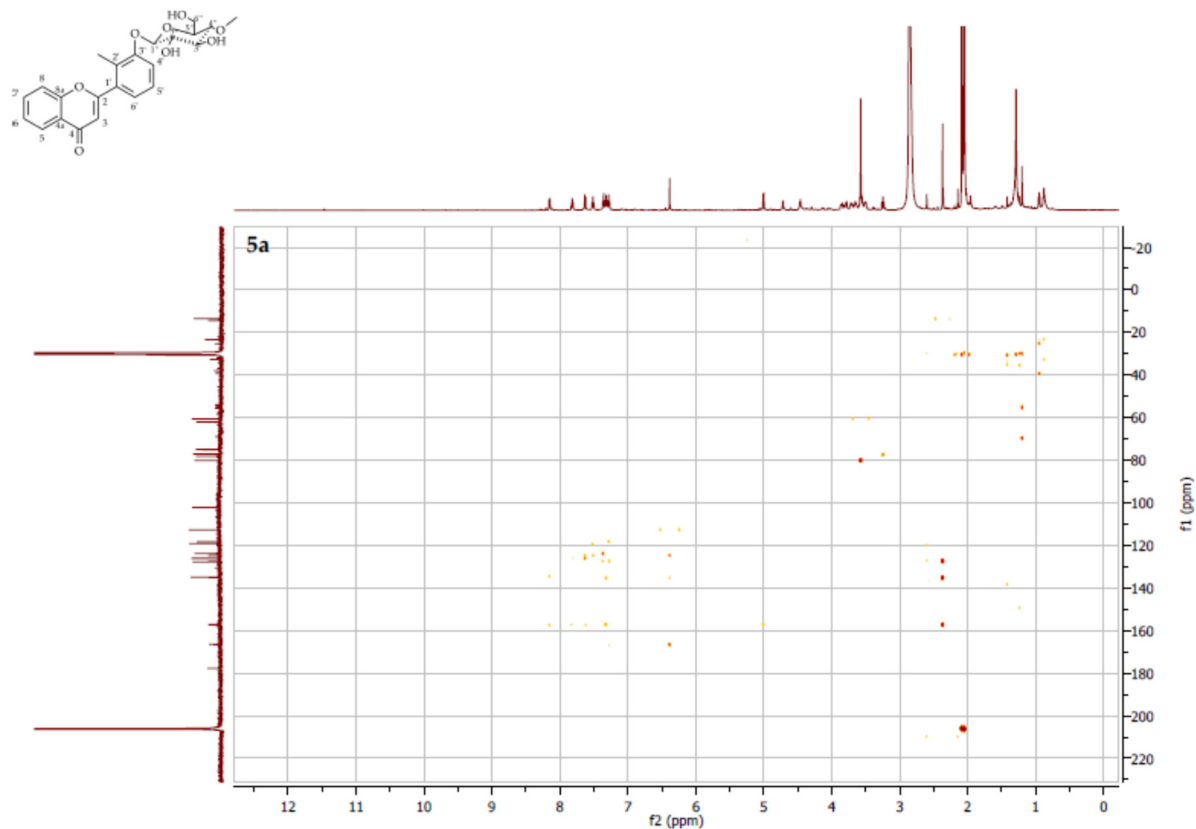

**Figure S132.** HMBC contour map –  $^1\text{H} \times ^{13}\text{C}$  expansion of 2'-methylflavone 3'-O- $\beta$ -D-(4''-O-methyl)-glucopyranoside (**5a**)



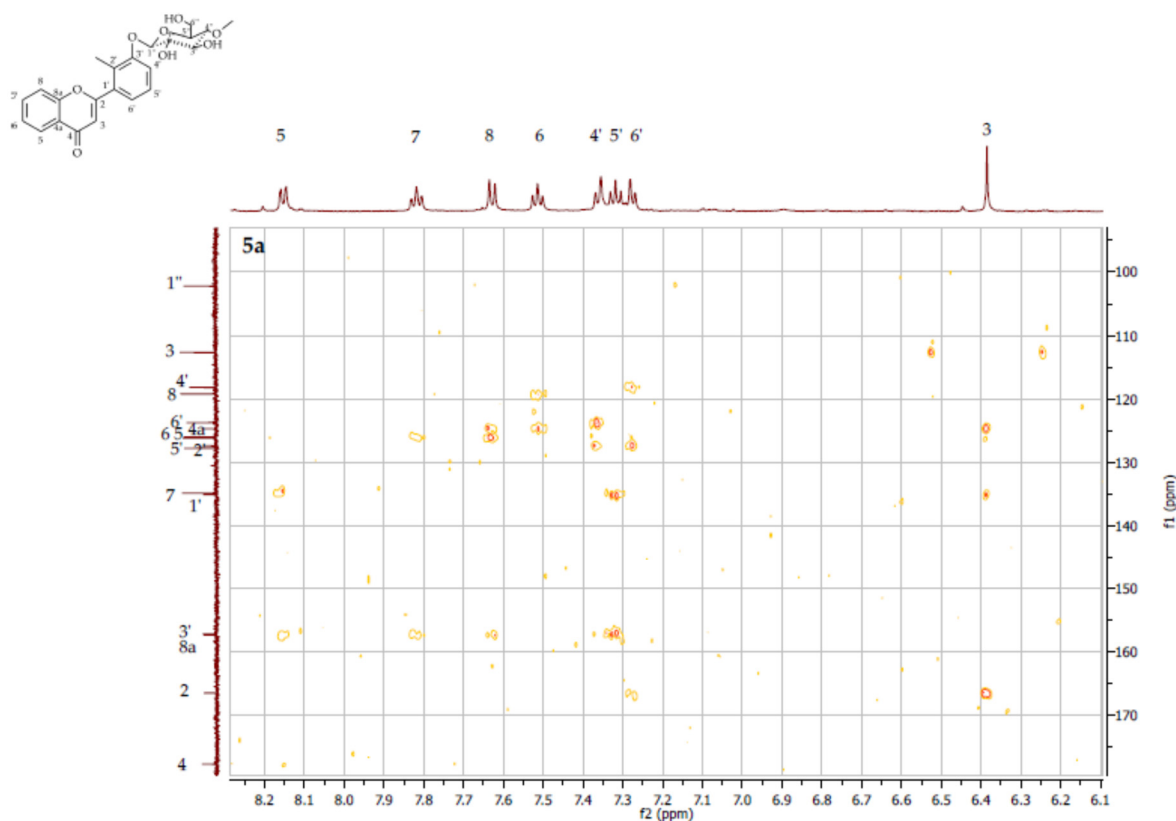

**Figure S133.** HMBC contour map –  $^1\text{H} \times ^{13}\text{C}$  expansion of 2'-methylflavone 3'-O-β-D-(4''-O-methyl)-glucopyranoside (5a)

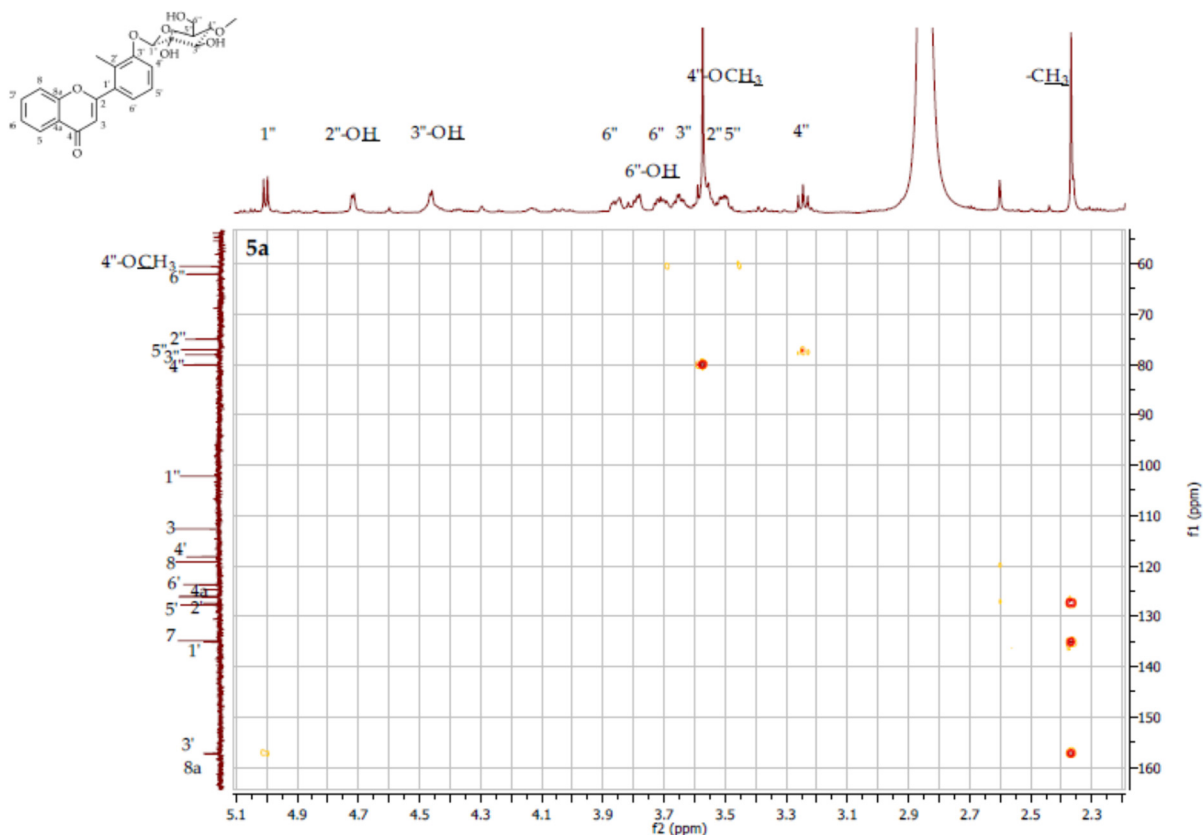

**Figure S134.** HMBC contour map –  $^1\text{H} \times ^{13}\text{C}$  expansion of 2'-methylflavone 3'-O-β-D-(4''-O-methyl)-glucopyranoside (5a)

Molecular formula: C<sub>23</sub>H<sub>24</sub>O<sub>8</sub>

Formula weight: 428.15

Ionization mode: positive

Precursor: [M + H]<sup>+</sup> 429.10

429.1000>253.1000 CE: -22.0

429.1000>121.0000 CE: -55.0

429.1000>159.0000 CE: -53.0

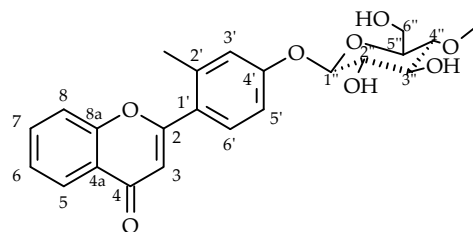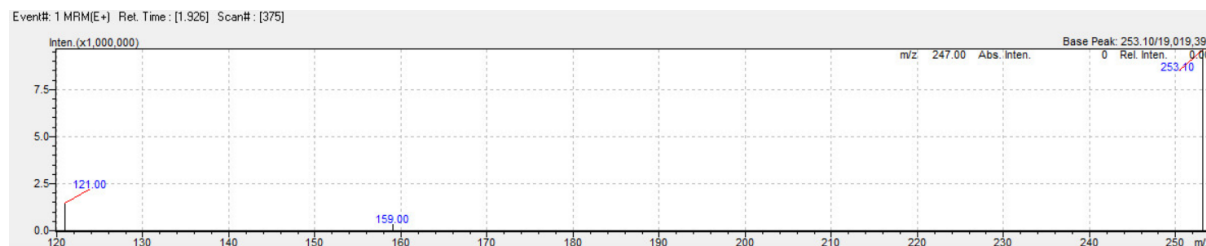

**Figure S135.** MS analysis of 2'-methylflavone 4'-O- $\beta$ -D-(4''-O-methyl)-glucopyranoside (**5b**)

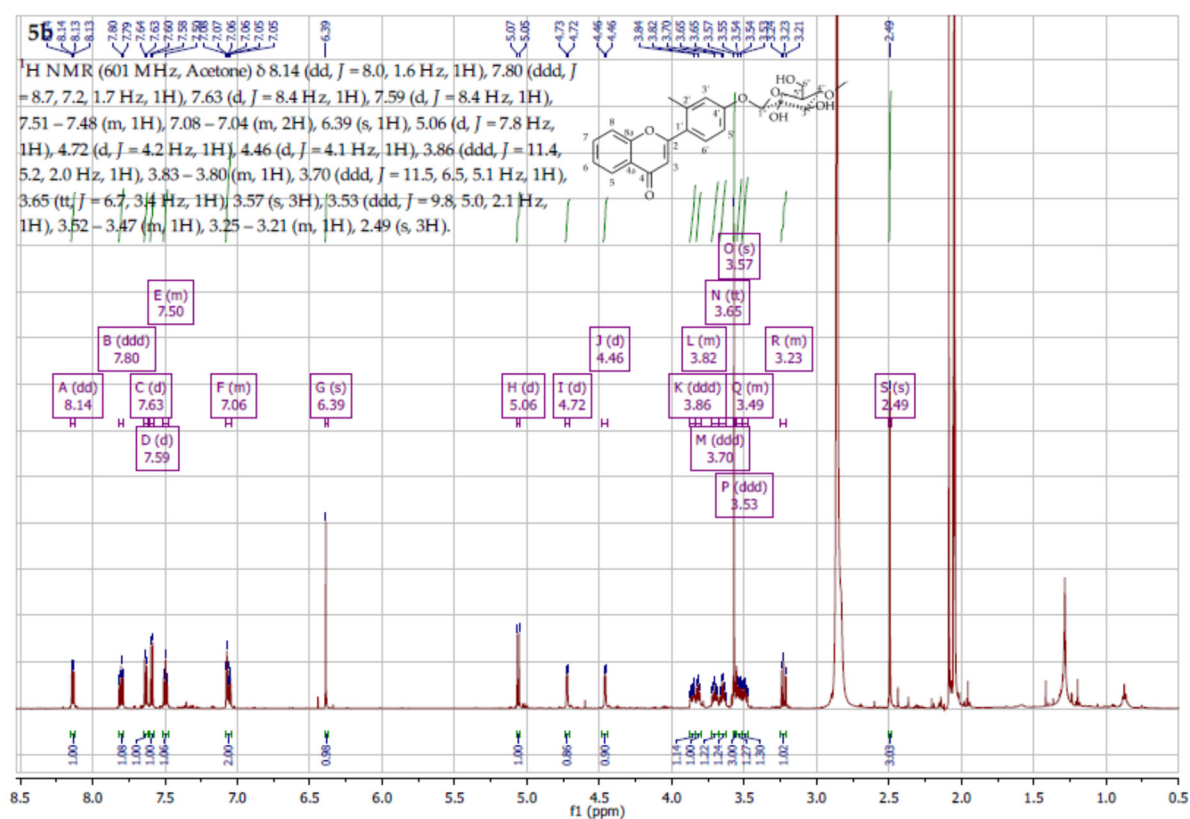

**Figure S136.** <sup>1</sup>H NMR spectrum ( $\delta$ , acetone-d<sub>6</sub>, 600 MHz) of 2'-methylflavone 4'-O- $\beta$ -D-(4''-O-methyl)-glucopyranoside (**5b**)

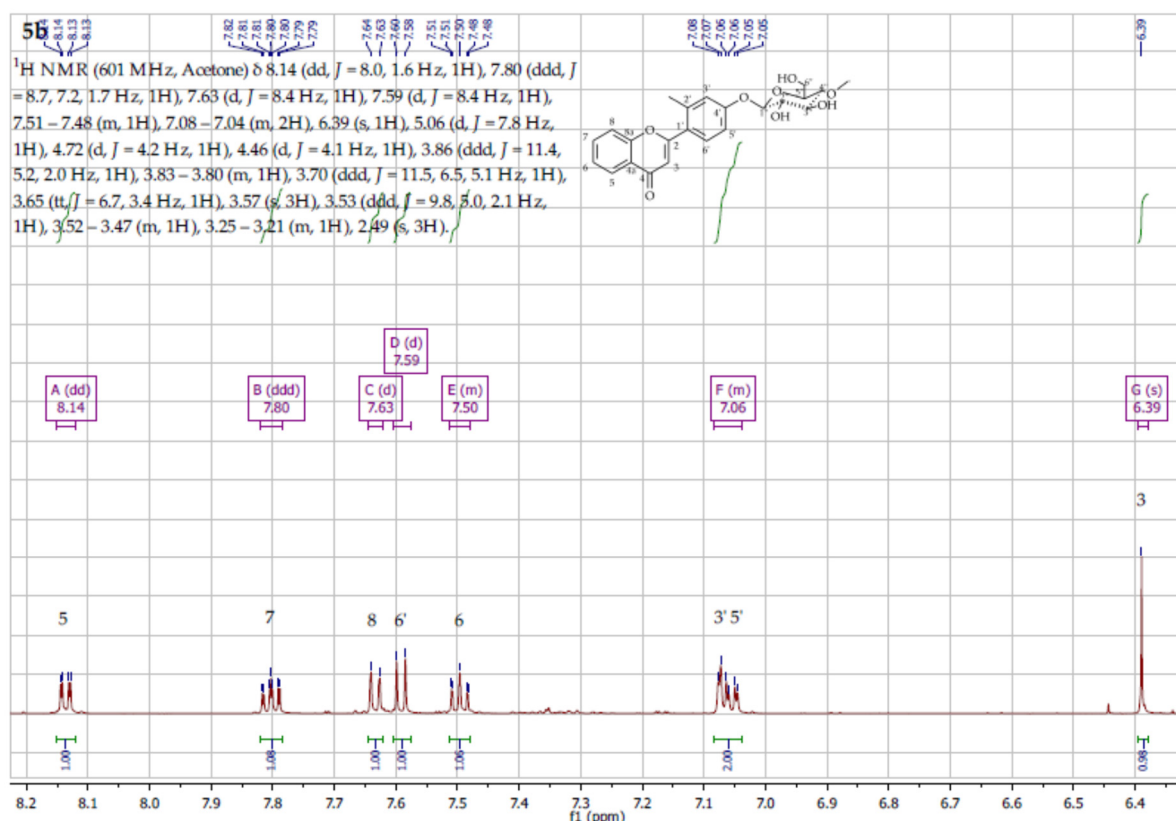

**Figure S137.** <sup>1</sup>H NMR spectrum expansion (δ, acetone-d<sub>6</sub>, 600 MHz) of 2'-methylflavone 4'-O-β-D-(4''-O-methyl)-glucopyranoside (**5b**)

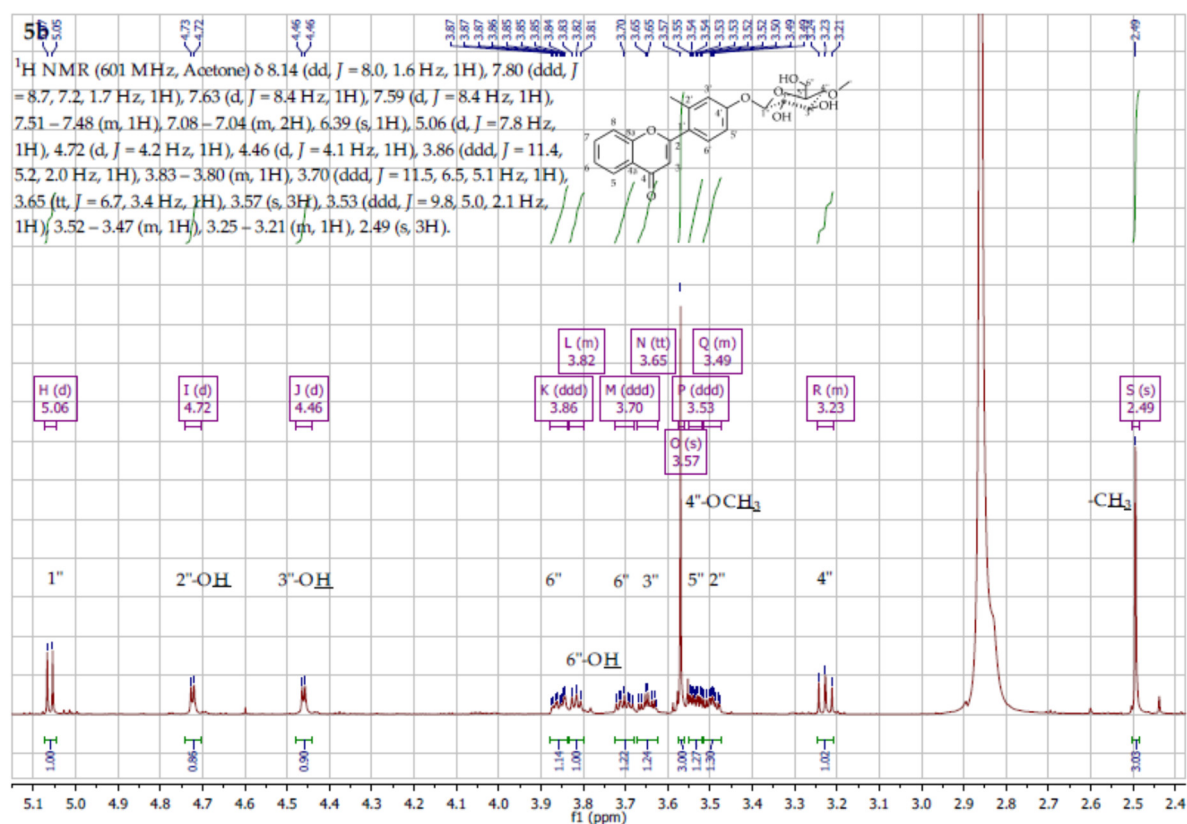

**Figure S138.**  $^1\text{H}$  NMR spectrum expansion ( $\delta$ , acetone- $\text{d}_6$ , 600 MHz) of 2'-methylflavone 4'- $O$ - $\beta$ -D-(4''- $O$ -methyl)-glucopyranoside (**5b**)

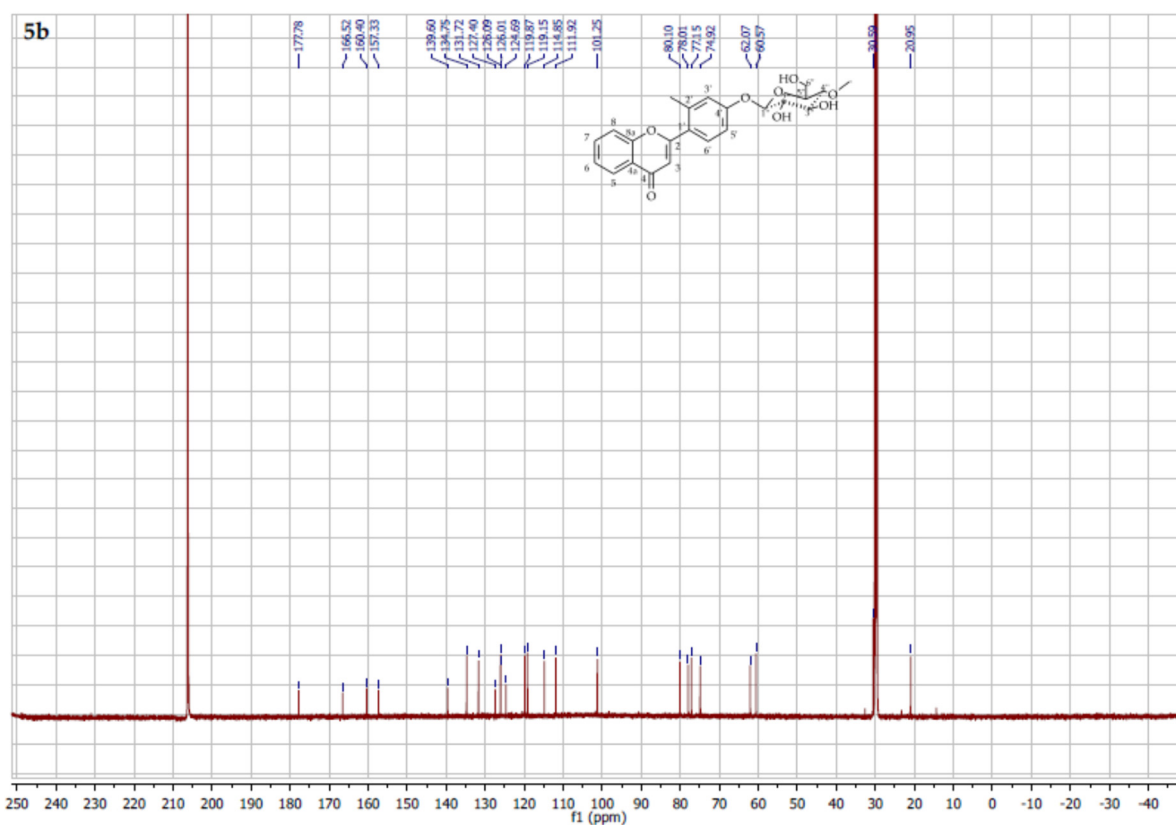

**Figure S139.**  $^{13}\text{C}$  NMR spectrum of ( $\delta$ , acetone- $d_6$ , 151 MHz) 2'-methylflavone 4'-O- $\beta$ -D-(4''-O-methyl)-glucopyranoside (**5b**)

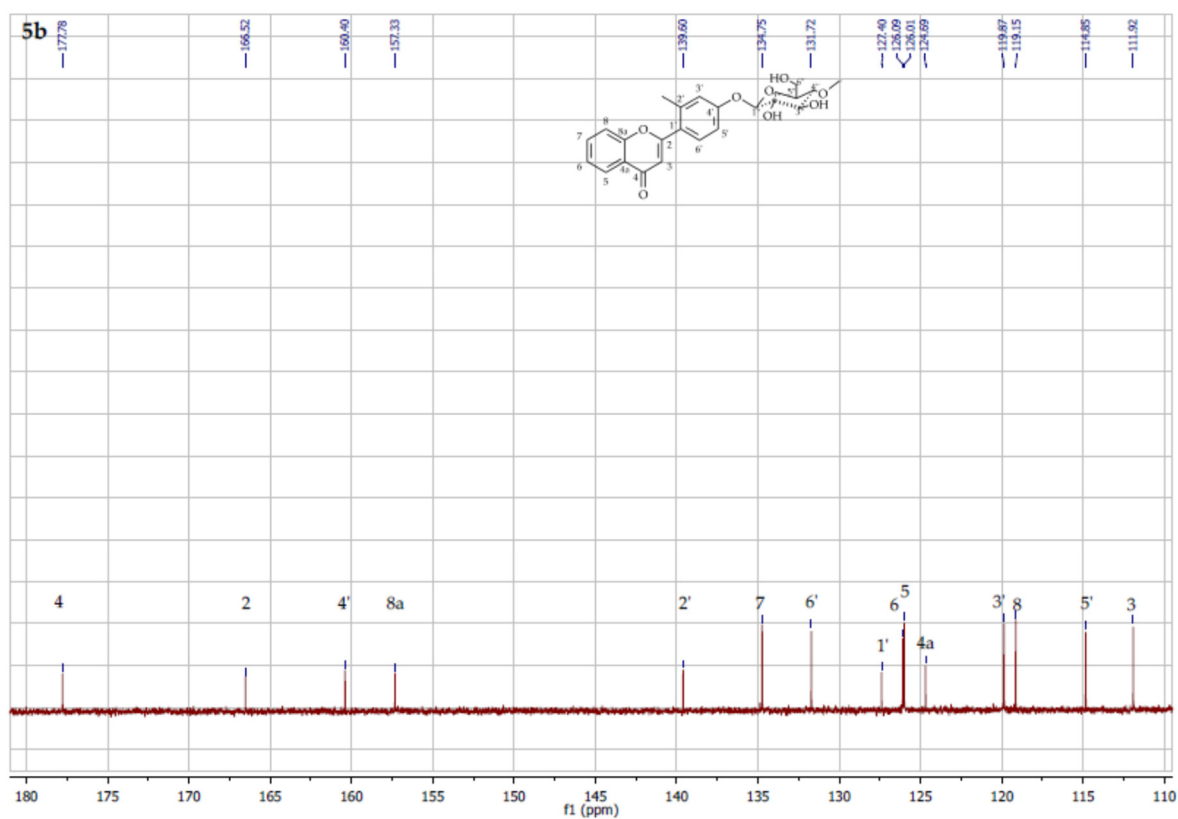

**Figure S140.**  $^{13}\text{C}$  NMR spectrum expansion ( $\delta$ , acetone- $d_6$ , 151 MHz) of 2'-methylflavone 4'-O- $\beta$ -D-(4''-O-methyl)-glucopyranoside (**5b**)

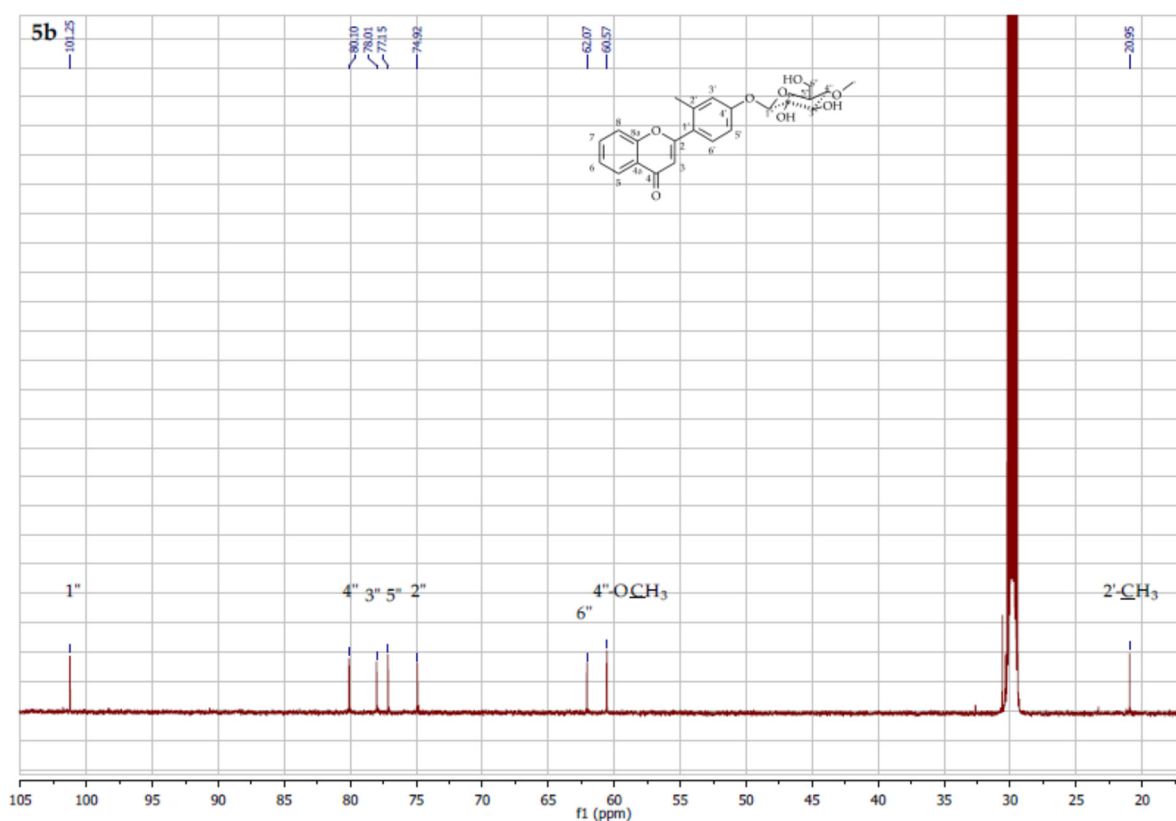

**Figure S141.**  $^{13}\text{C}$  NMR spectrum expansion ( $\delta$ , acetone- $d_6$ , 151 MHz) of 2'-methylflavone 4'- $O$ - $\beta$ -D-(4''- $O$ -methyl)-glucopyranoside (**5b**)

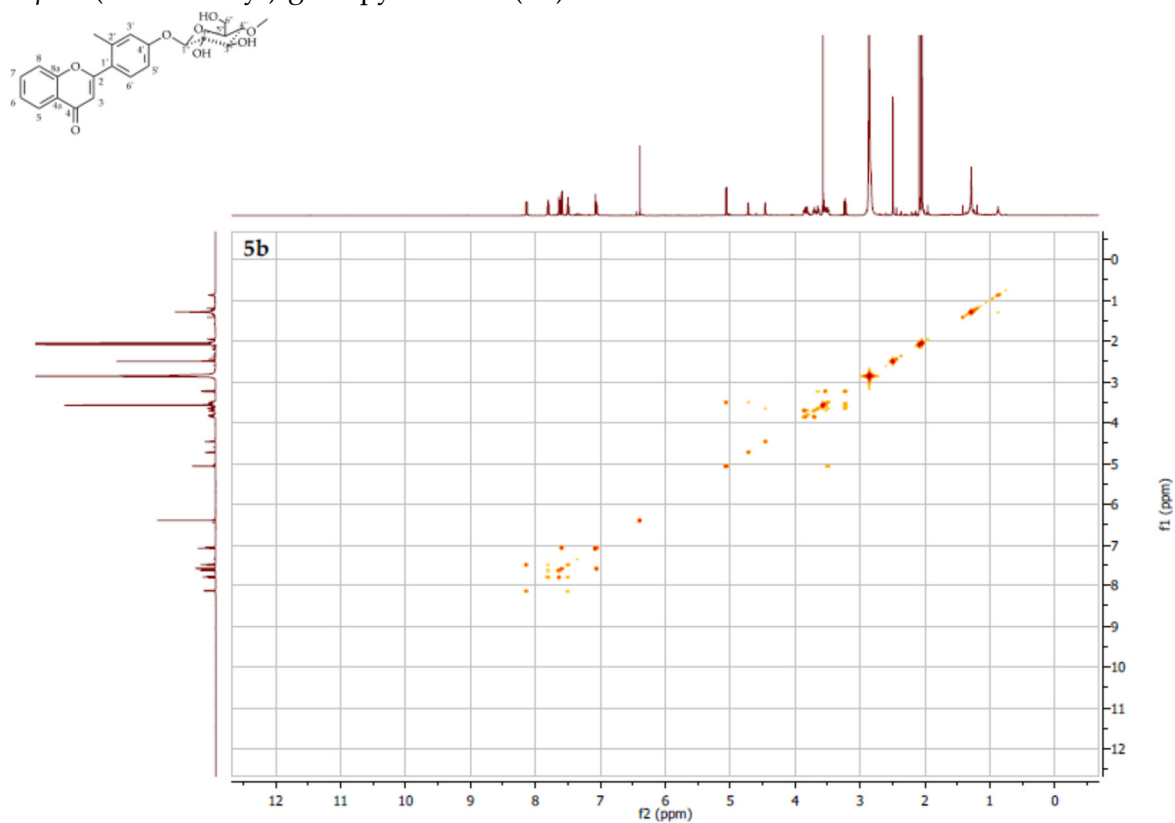

**Figure S142.** COSY contour map –  $^1\text{H} \times ^1\text{H}$  2'-methylflavone 4'- $O$ - $\beta$ -D-(4''- $O$ -methyl)-glucopyranoside (**5b**)

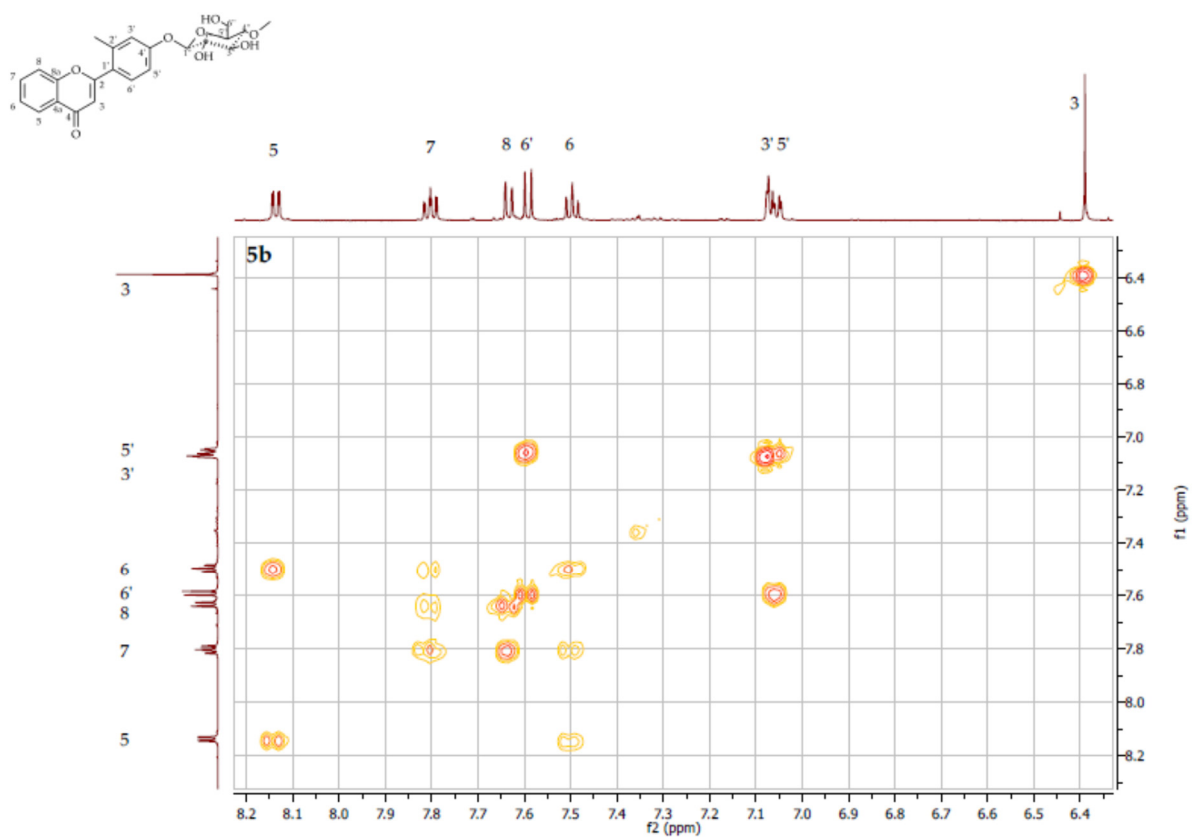

**Figure S143.** COSY contour map –  $^1\text{H} \times ^1\text{H}$  expansion of 2'-methylflavone 4'-O- $\beta$ -D-(4''-O-methyl)-glucopyranoside (**5b**)

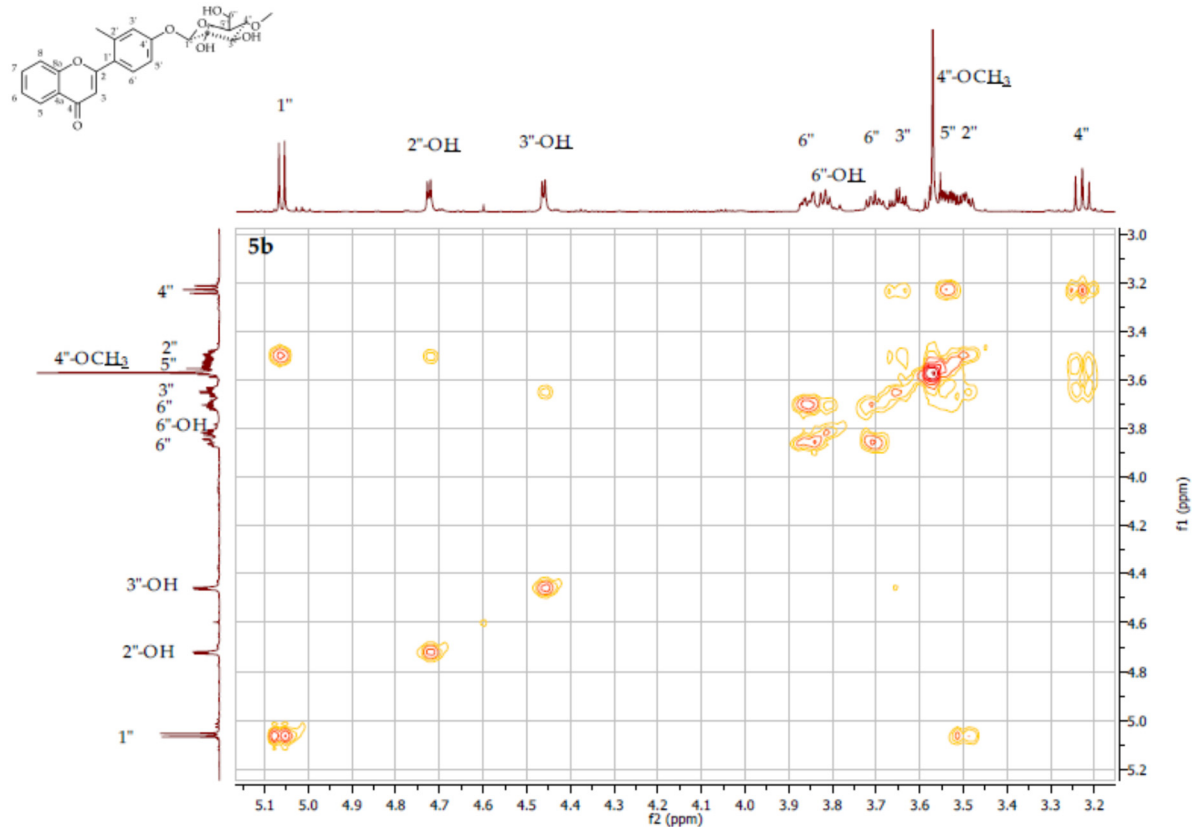

**Figure S144.** COSY contour map –  $^1\text{H} \times ^1\text{H}$  expansion of 2'-methylflavone 4'-O- $\beta$ -D-(4''-O-methyl)-glucopyranoside (**5b**)

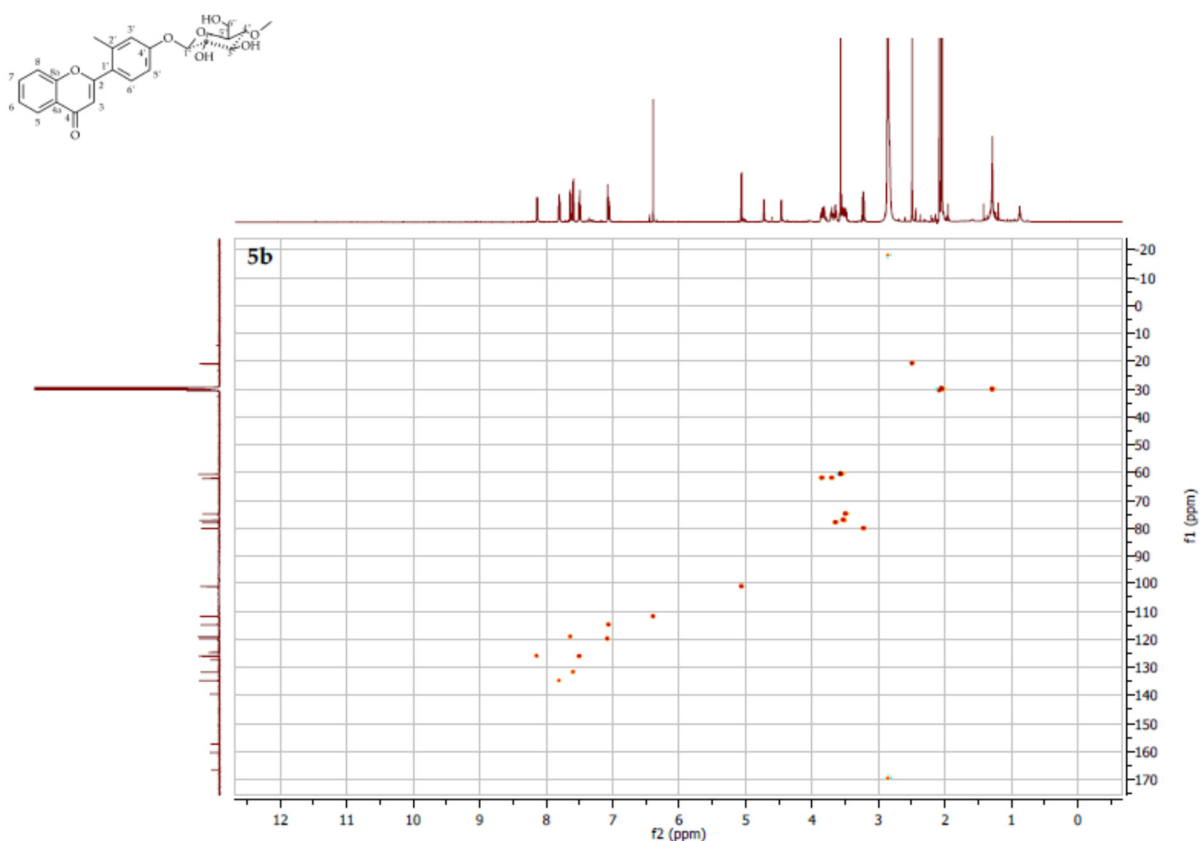

**Figure S145.** HSQC contour map –  $^1\text{H} \times ^{13}\text{C}$  of 2'-methylflavone 4'-O- $\beta$ -D-(4''-O-methyl)-glucopyranoside (**5b**)

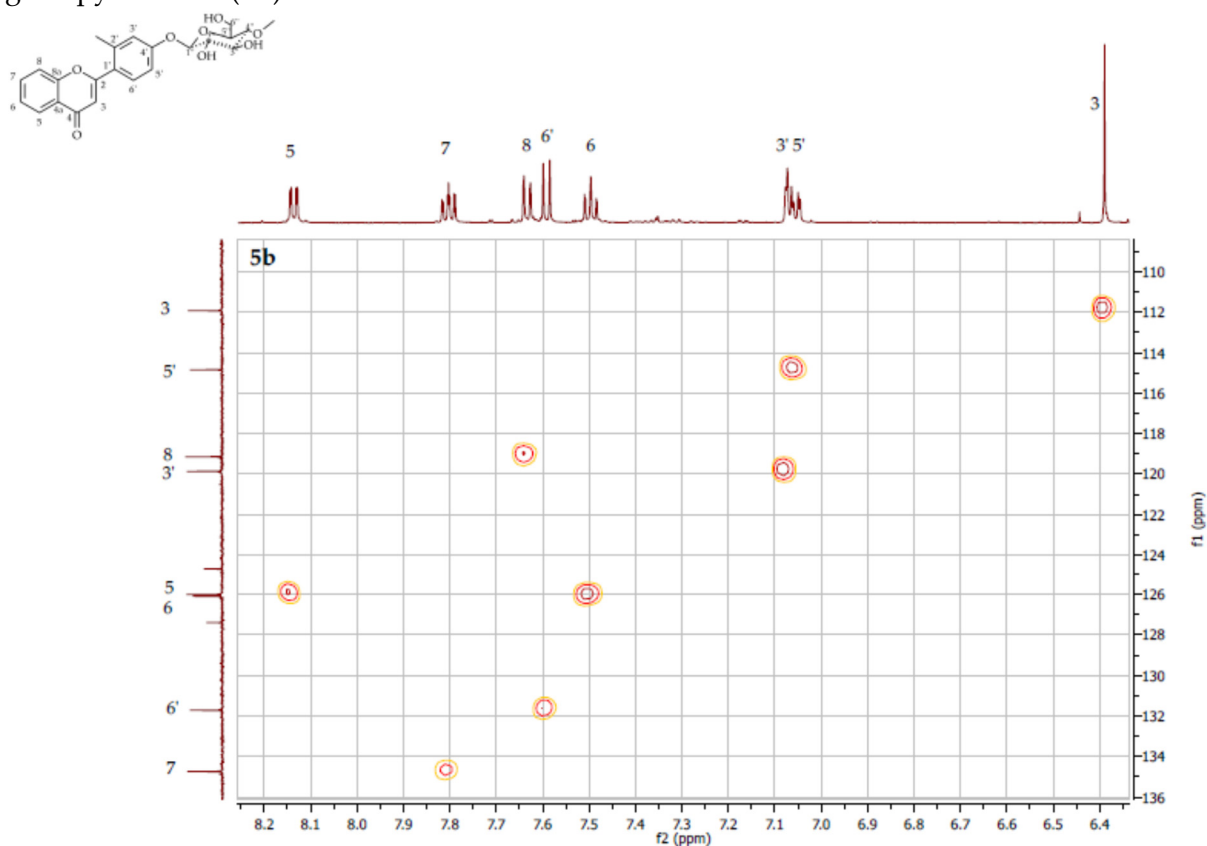

**Figure S146.** HSQC contour map –  $^1\text{H} \times ^{13}\text{C}$  expansion of 2'-methylflavone 4'-O- $\beta$ -D-(4''-O-methyl)-glucopyranoside (**5b**)



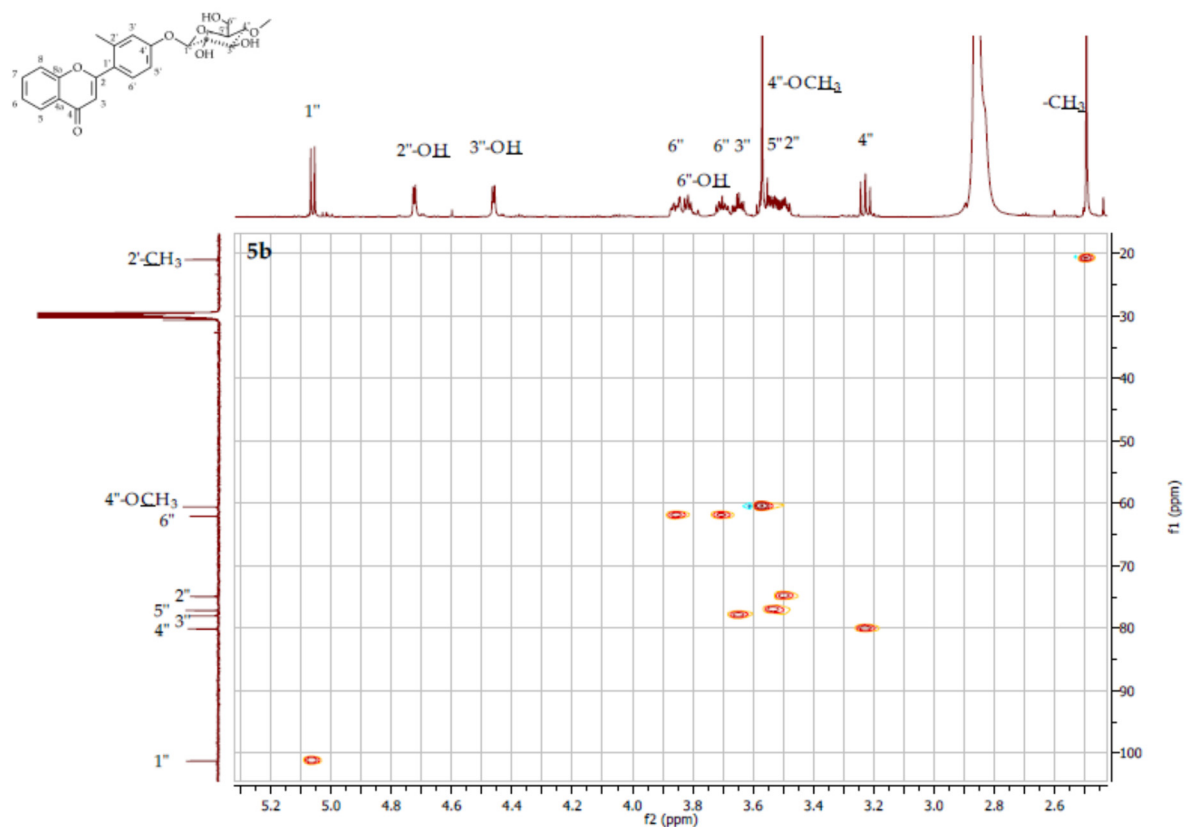

**Figure S147.** HSQC contour map –  $^1\text{H} \times ^{13}\text{C}$  expansion of 2'-methylflavone 4'-O- $\beta$ -D-(4''-O-methyl)-glucopyranoside (**5b**)

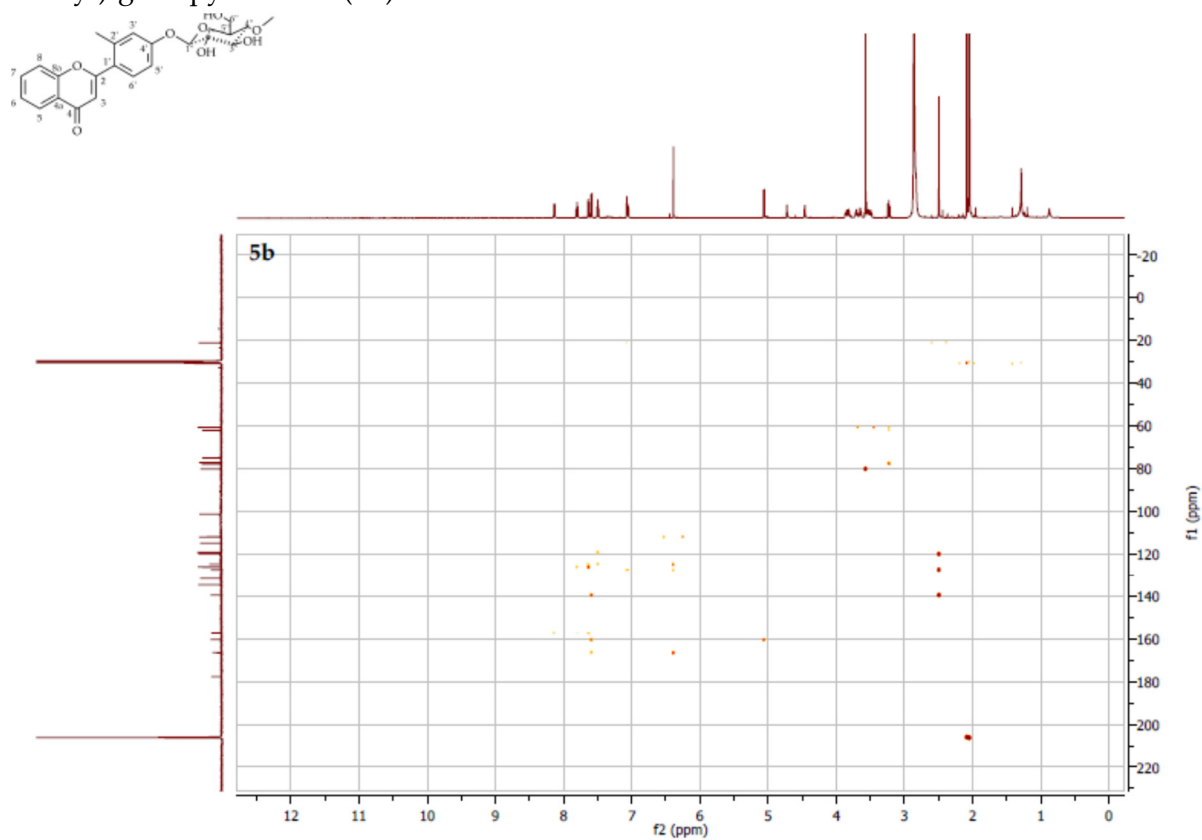

**Figure S148.** HMBC contour map –  $^1\text{H} \times ^{13}\text{C}$  of 2'-methylflavone 4'-O- $\beta$ -D-(4''-O-methyl)-glucopyranoside (**5b**)



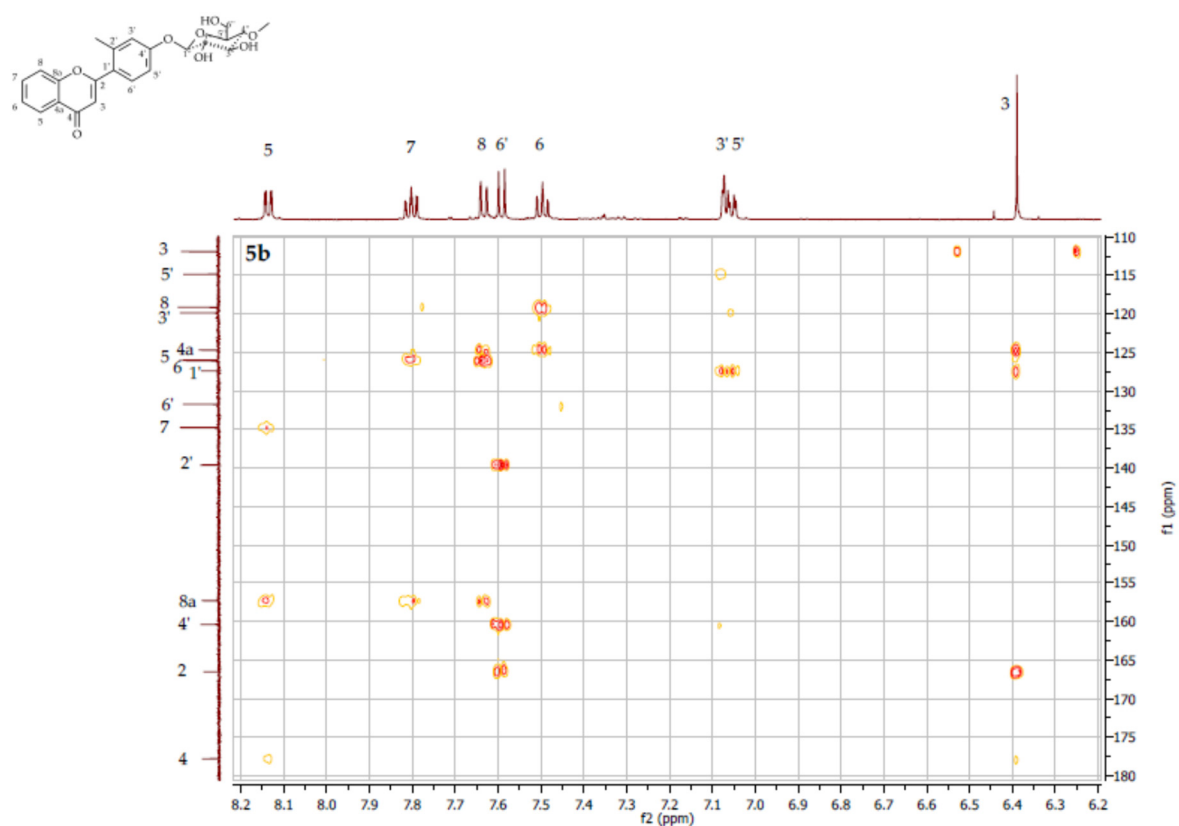

**Figure S149.** HMBC contour map – <sup>1</sup>H × <sup>13</sup>C expansion of 2'-methylflavone 4'-O-β-D-(4''-O-methyl)-glucopyranoside (**5b**)

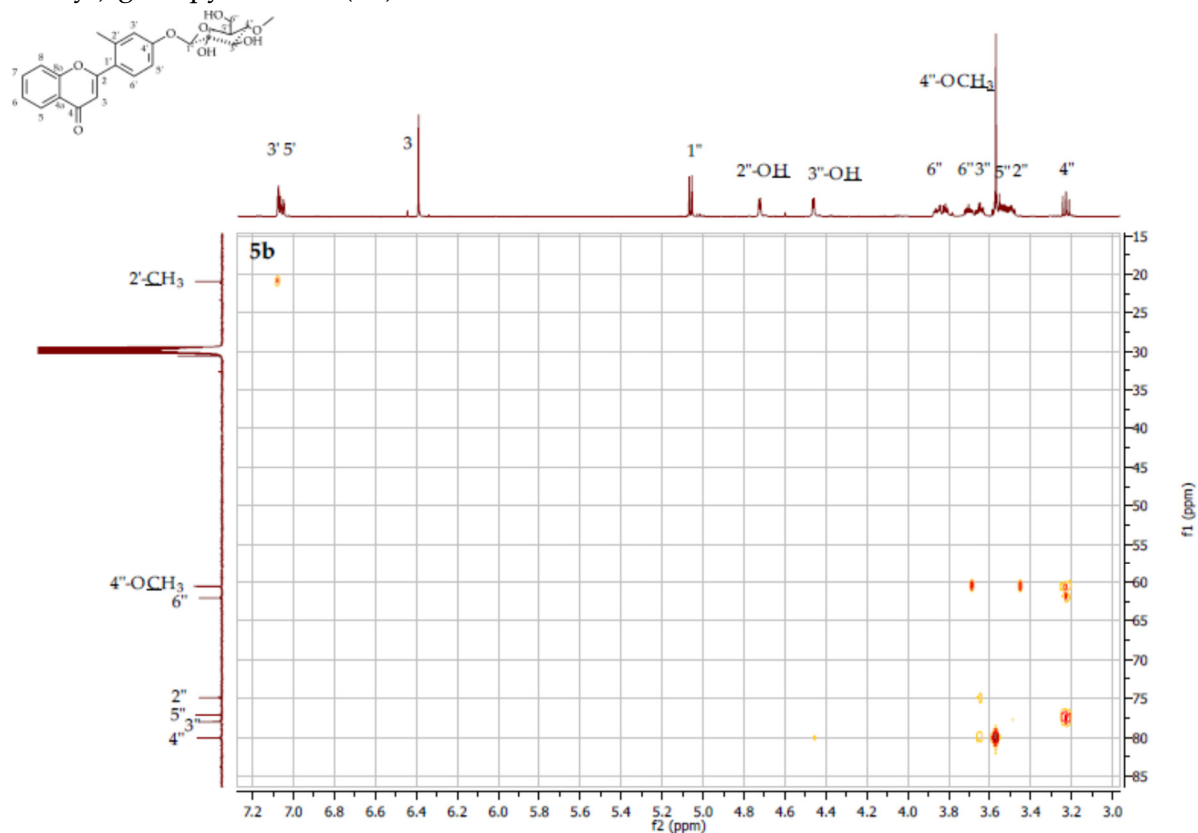

**Figure S150.** HMBC contour map – <sup>1</sup>H × <sup>13</sup>C expansion of 2'-methylflavone 4'-O-β-D-(4''-O-methyl)-glucopyranoside (**5b**)

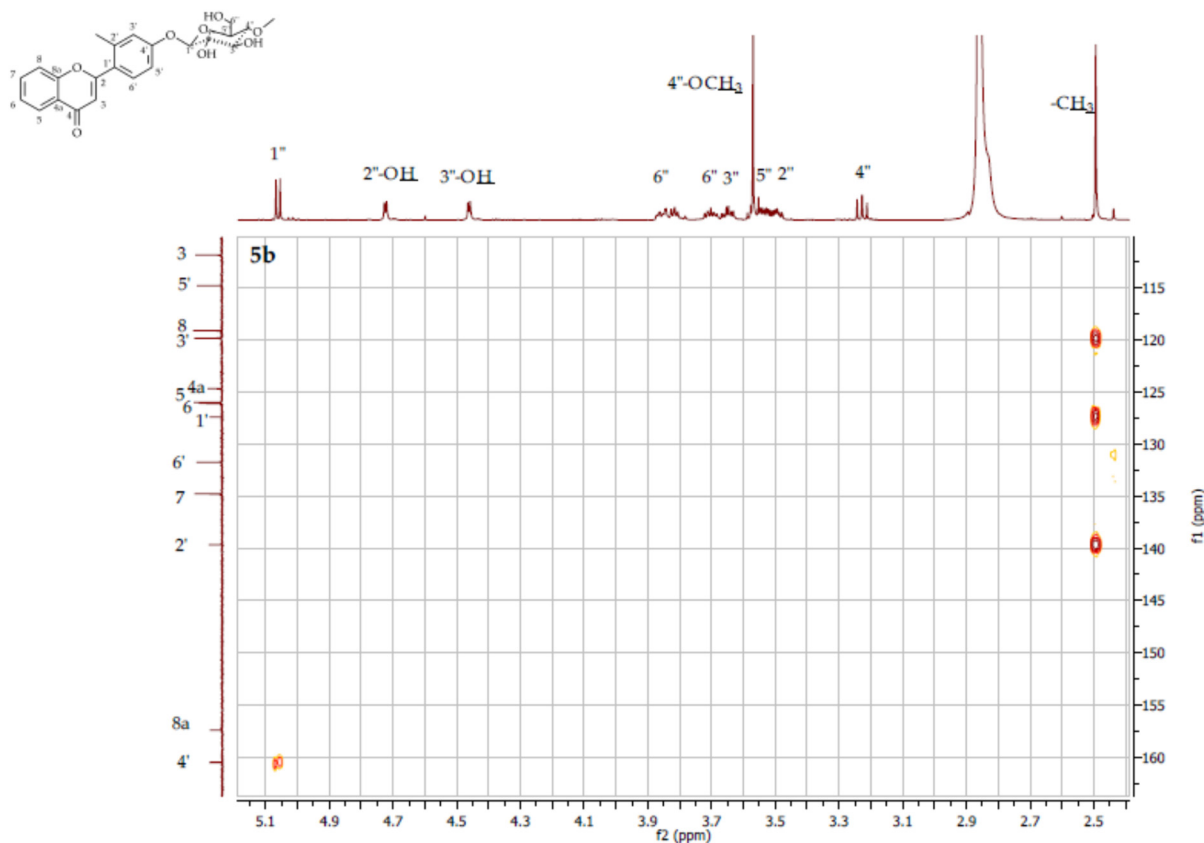

**Figure S151.** HMBC contour map –  $^1\text{H} \times ^{13}\text{C}$  expansion of 2'-methylflavone 4'-O- $\beta$ -D-(4''-O-methyl)-glucopyranoside (**5b**)

Molecular formula =  $\text{C}_{23}\text{H}_{24}\text{O}_8$

Formula weight = 428.15

Ionization mode = positive

Precursor:  $[\text{M} + \text{H}]^+ 429.20$

429.2000 > 253.0500 CE: -32.0

429.2000 > 294.9500 CE: -25.0

429.2000 > 121.0500 CE: -55.0

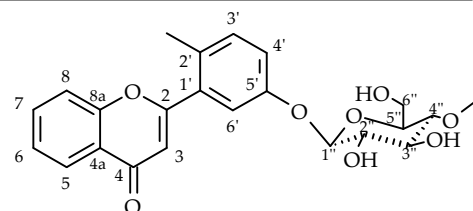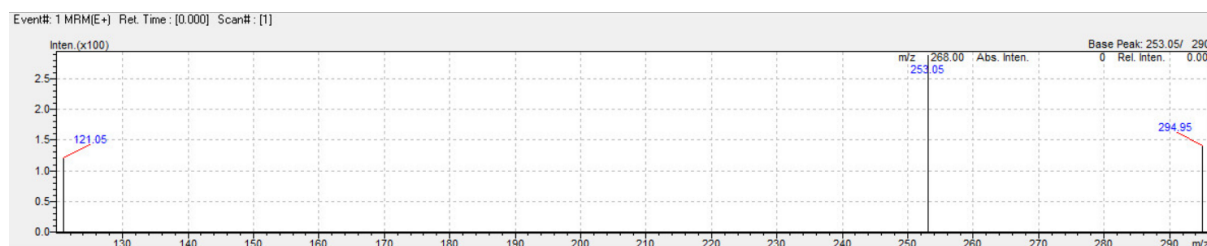

**Figure S152.** MS analysis of 2'-methylflavone 5'-O- $\beta$ -D-(4''-O-methyl)-glucopyranoside (**5c**)

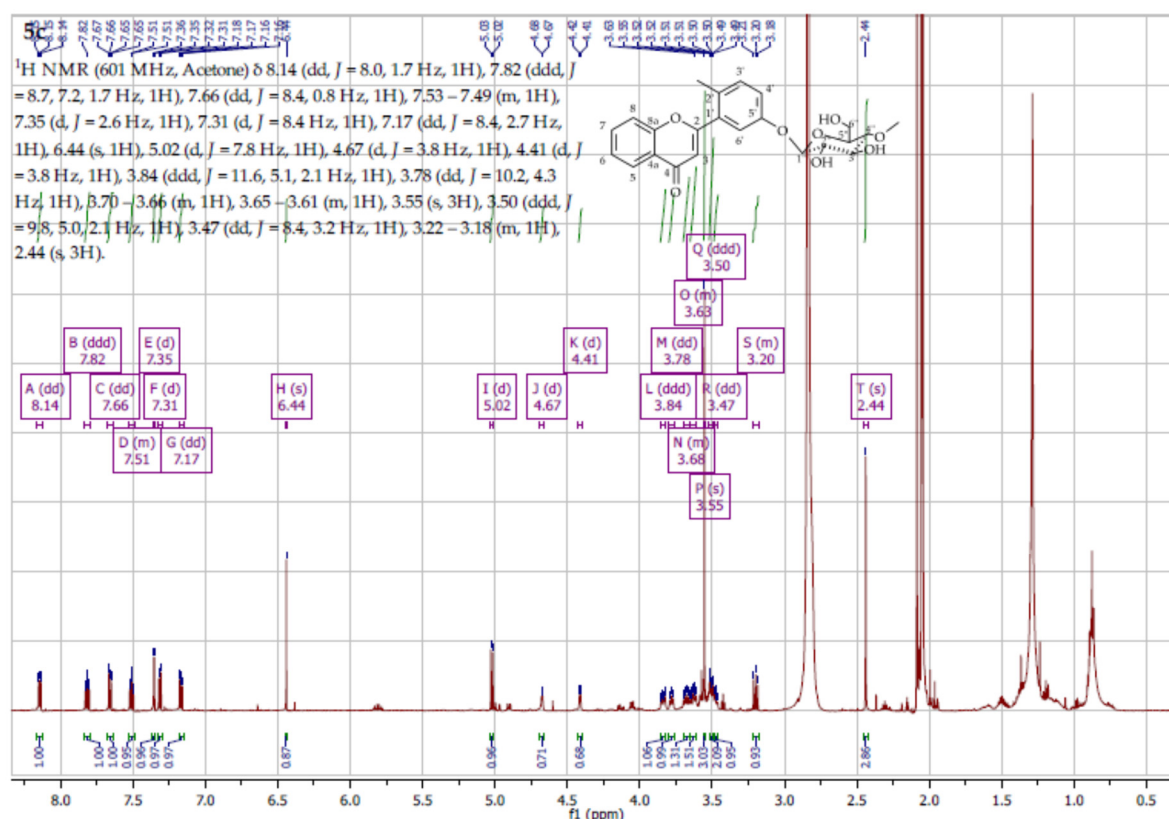

**Figure S153.** <sup>1</sup>H NMR spectrum (δ, acetone-d<sub>6</sub>, 600 MHz) of 2'-methylflavone 5'-O-β-D-(4''-O-methyl)-glucopyranoside (5c)

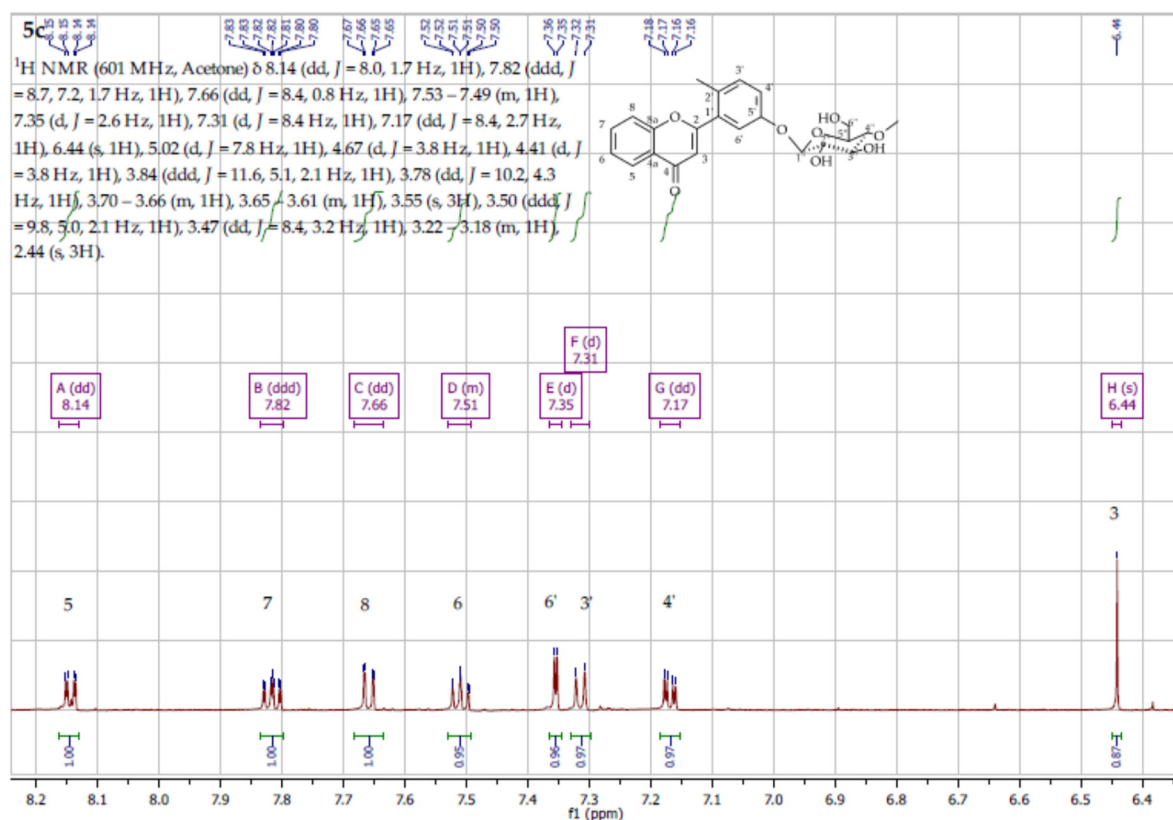

**Figure S154.** <sup>1</sup>H NMR spectrum expansion (δ, acetone-d<sub>6</sub>, 600 MHz) of 2'-methylflavone 5'-O-β-D-(4''-O-methyl)-glucopyranoside (5c)

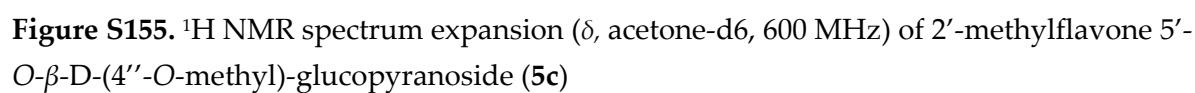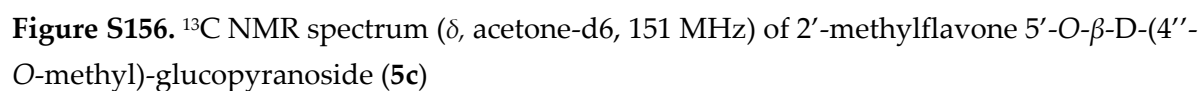

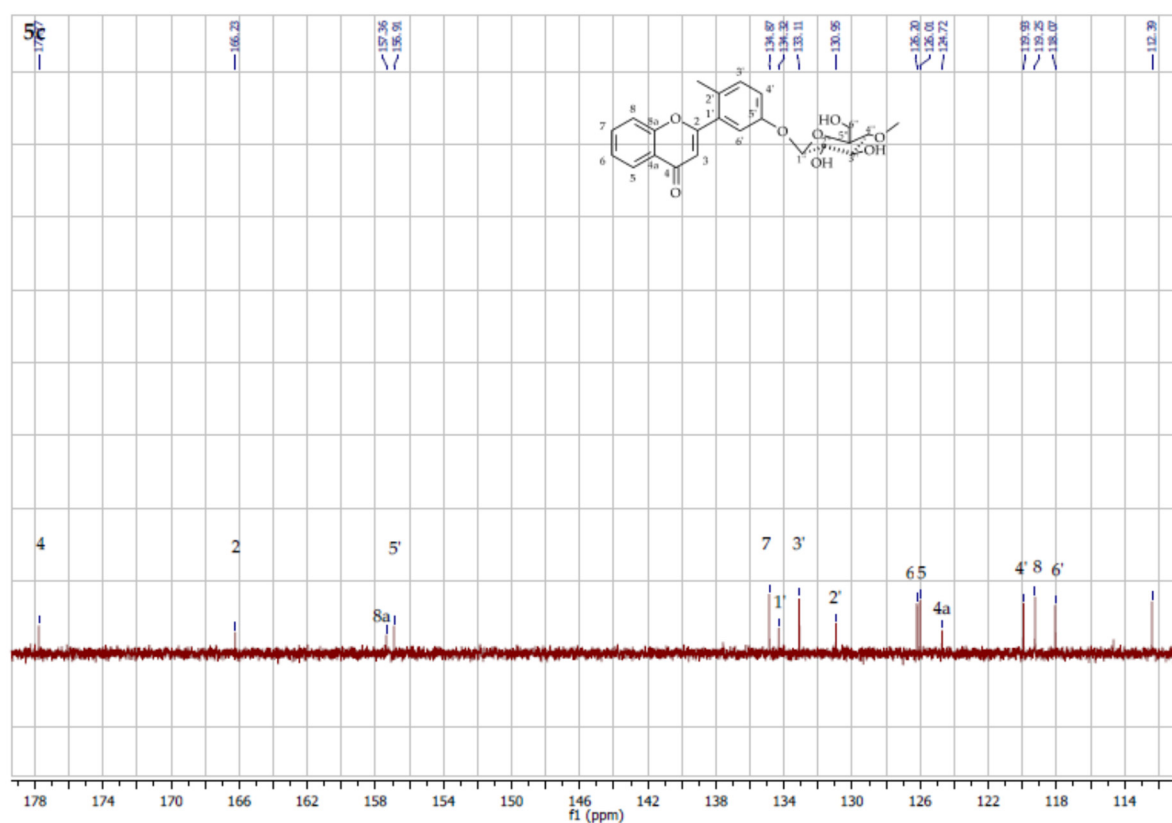

**Figure S157.**  $^{13}\text{C}$  NMR spectrum expansion ( $\delta$ , acetone- $d_6$ , 151 MHz) of 2'-methylflavone 5'- $O$ - $\beta$ -D-(4''- $O$ -methyl)-glucopyranoside (**5c**)

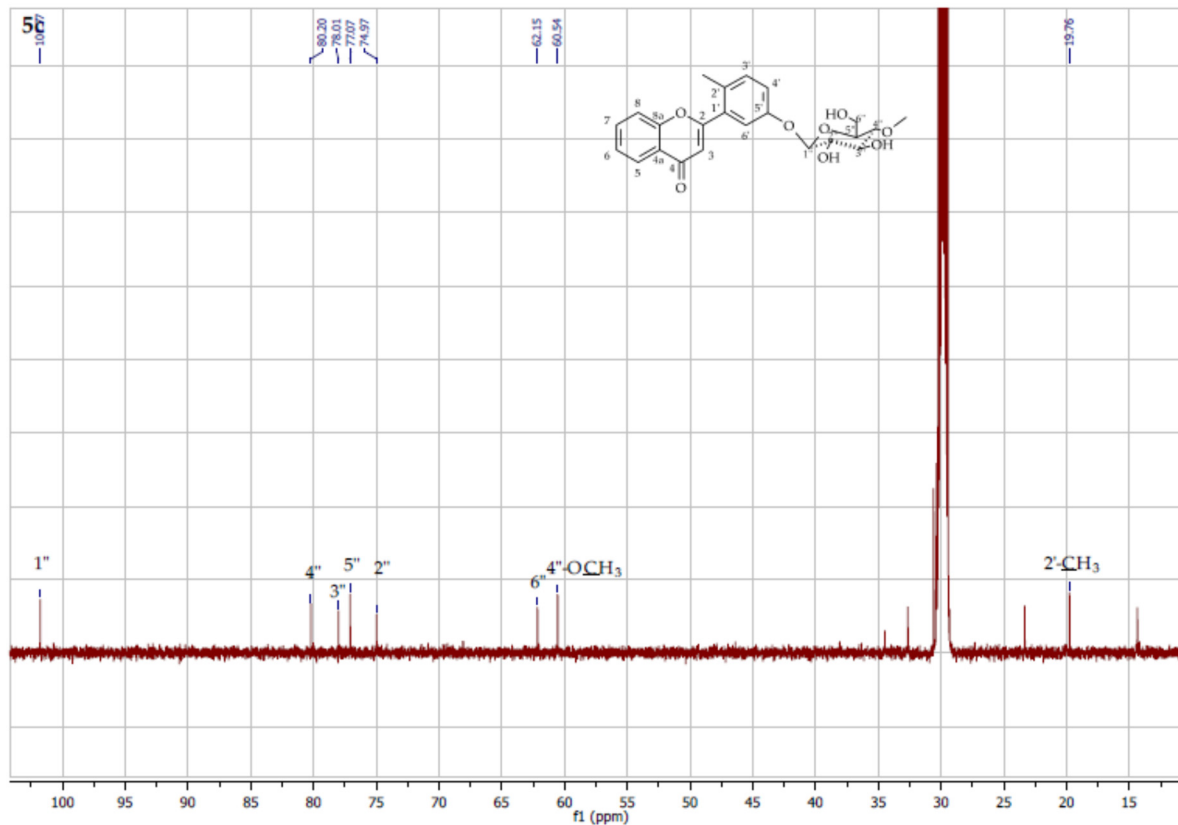

**Figure S158.**  $^{13}\text{C}$  NMR spectrum expansion ( $\delta$ , acetone- $d_6$ , 151 MHz) of 2'-methylflavone 5'- $O$ - $\beta$ -D-(4''- $O$ -methyl)-glucopyranoside (**5c**)

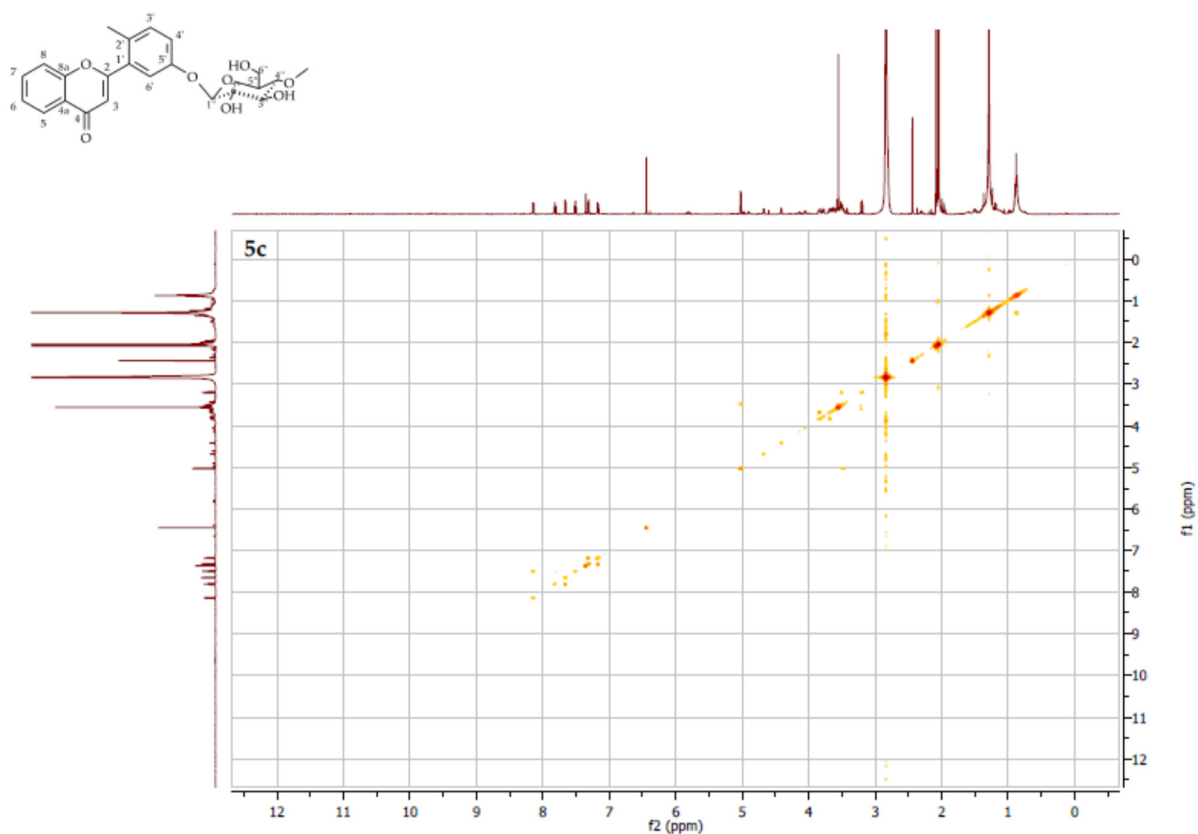

**Figure S159.** COSY contour map –  $^1\text{H} \times ^1\text{H}$  of 2'-methylflavone 5'-O- $\beta$ -D-(4''-O-methyl)-glucopyranoside (**5c**)

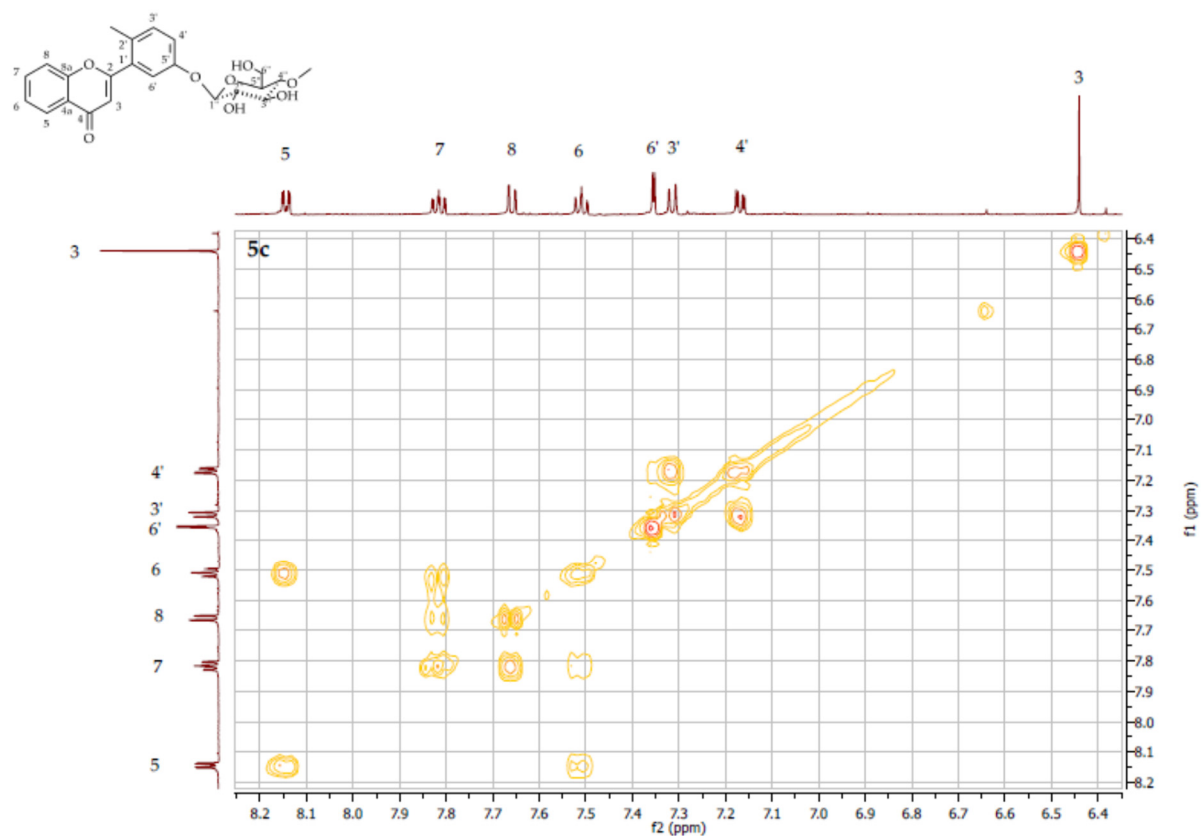

**Figure S160.** COSY contour map –  $^1\text{H} \times ^1\text{H}$  expansion of 2'-methylflavone 5'-O- $\beta$ -D-(4''-O-methyl)-glucopyranoside (**5c**)

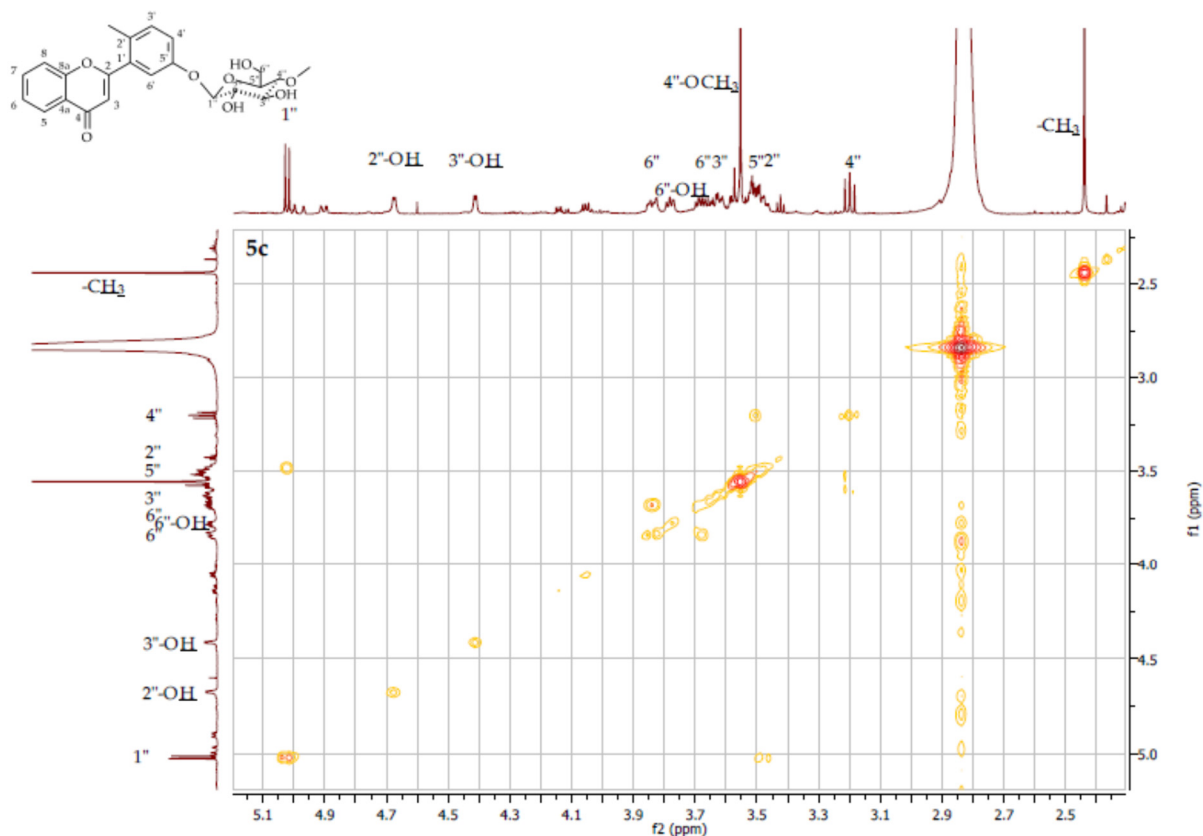

**Figure S161.** COSY contour map –  $^1\text{H} \times ^1\text{H}$  expansion of 2'-methylflavone 5'-O- $\beta$ -D-(4''-O-methyl)-glucopyranoside (**5c**)

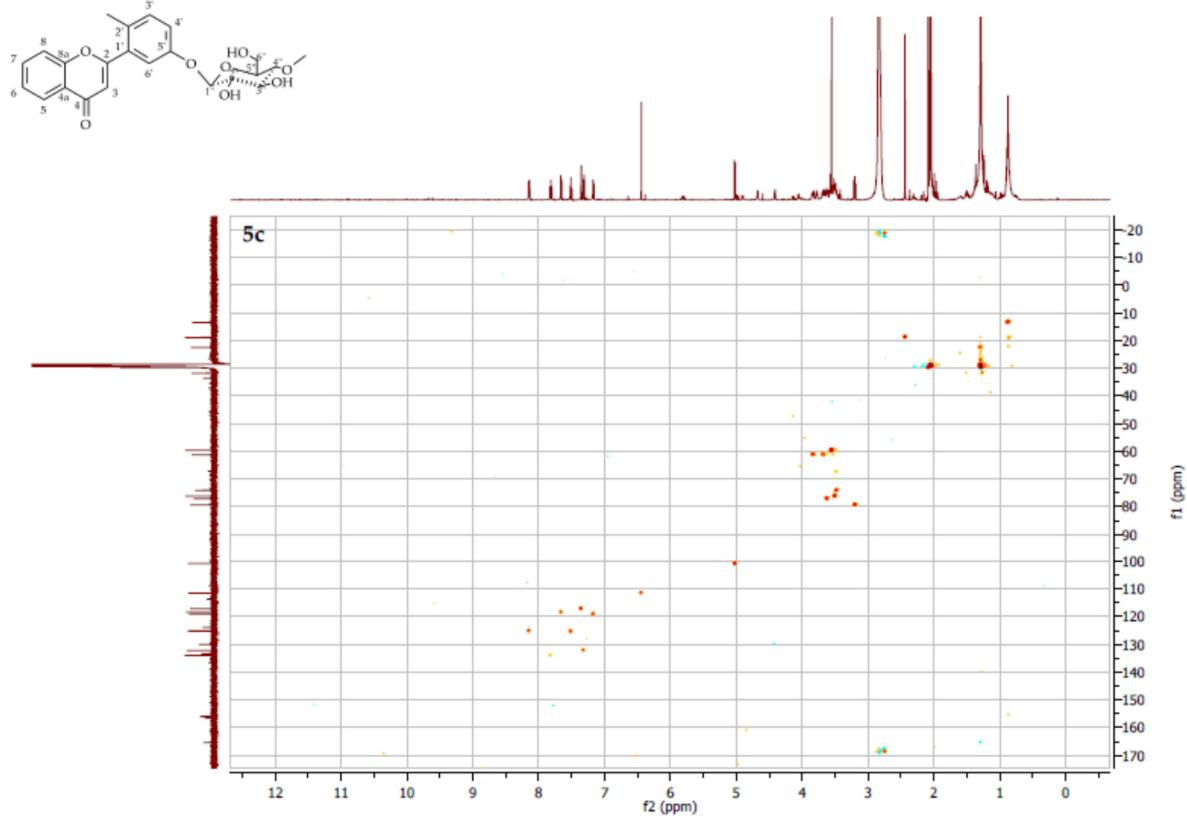

**Figure S162.** HSQC contour map –  $^1\text{H} \times ^{13}\text{C}$  of 2'-methylflavone 5'-O- $\beta$ -D-(4''-O-methyl)-glucopyranoside (**5c**)



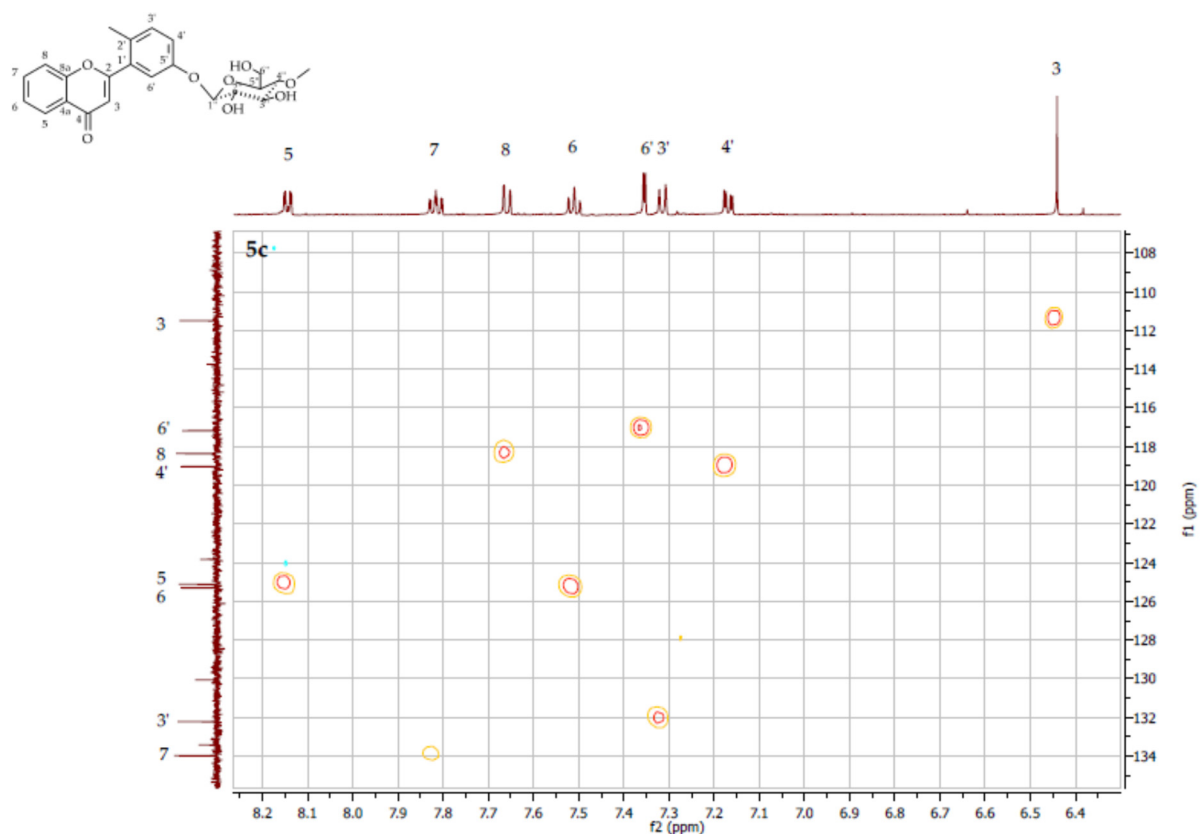

**Figure S163.** HSQC contour map –  $^1\text{H} \times ^{13}\text{C}$  expansion of 2'-methylflavone 5'-O- $\beta$ -D-(4''-O-methyl)-glucopyranoside (**5c**)

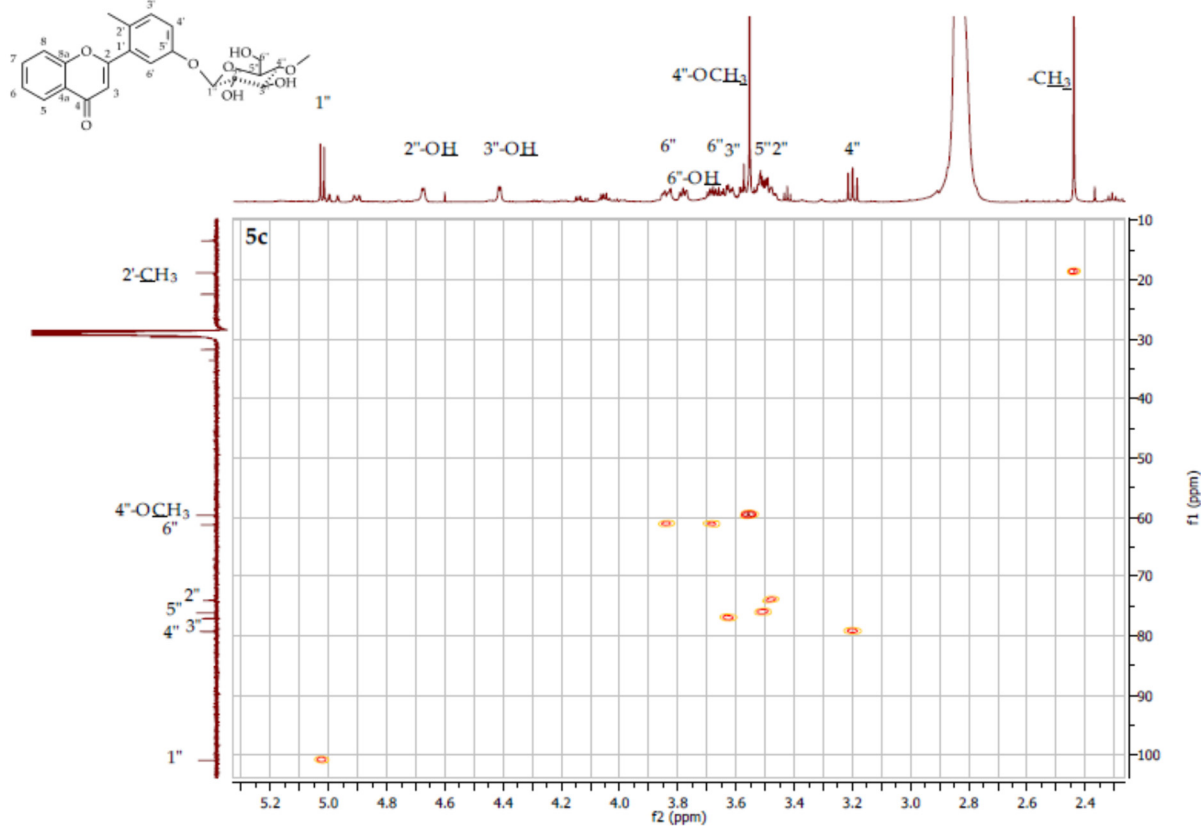

**Figure S164.** HSQC contour map –  $^1\text{H} \times ^{13}\text{C}$  expansion of 2'-methylflavone 5'-O- $\beta$ -D-(4''-O-methyl)-glucopyranoside (**5c**)



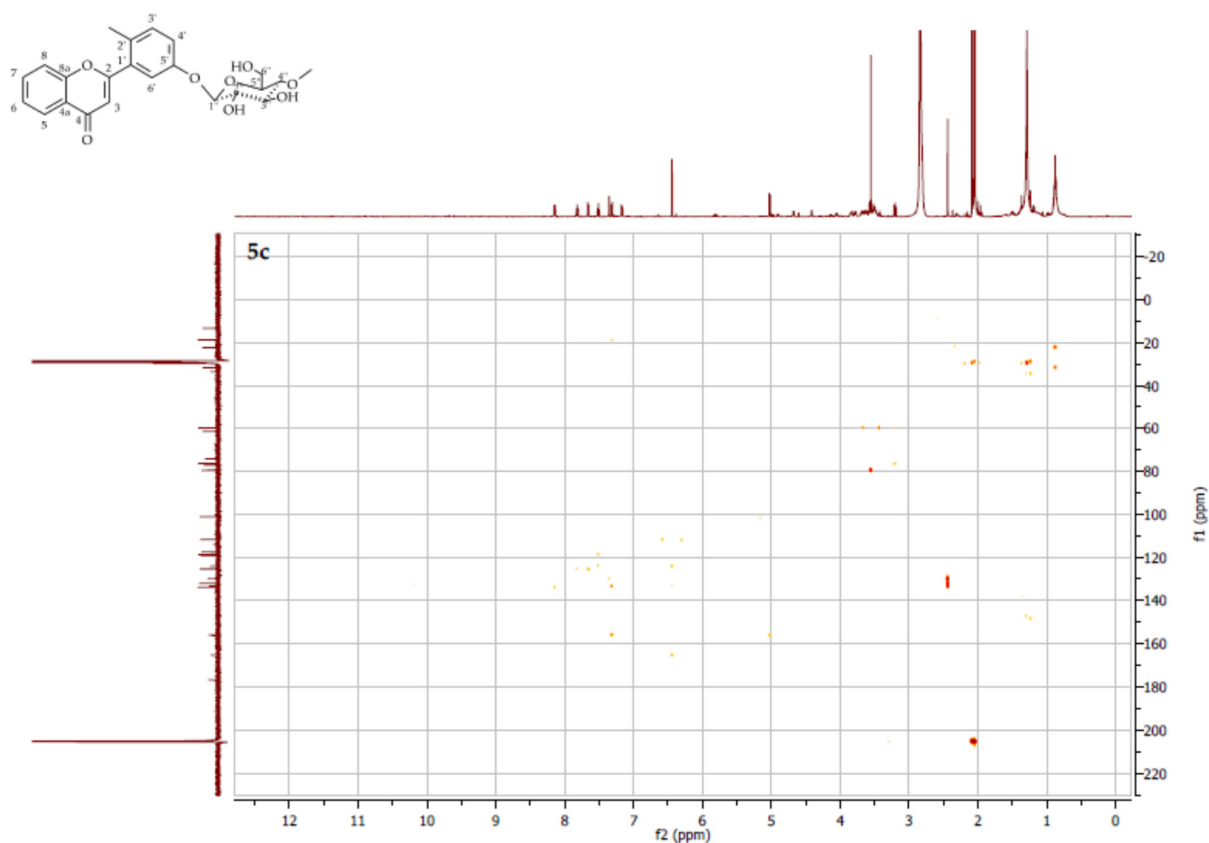

**Figure S165.** HMBC contour map –  $^1\text{H} \times ^{13}\text{C}$  of 2'-methylflavone 5'-O- $\beta$ -D-(4''-O-methyl)-glucopyranoside (**5c**)

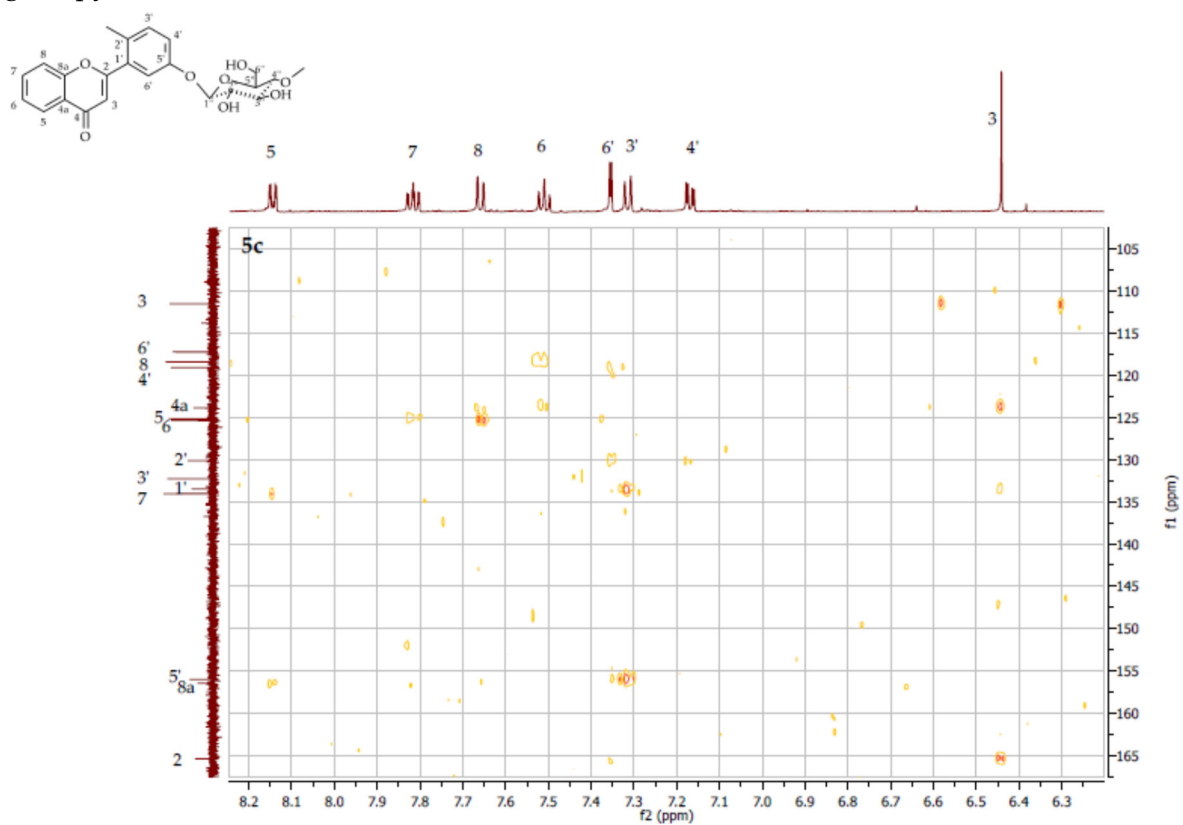

**Figure S166.** HMBC contour map –  $^1\text{H} \times ^{13}\text{C}$  expansion of 2'-methylflavone 5'-O- $\beta$ -D-(4''-O-methyl)-glucopyranoside (**5c**)

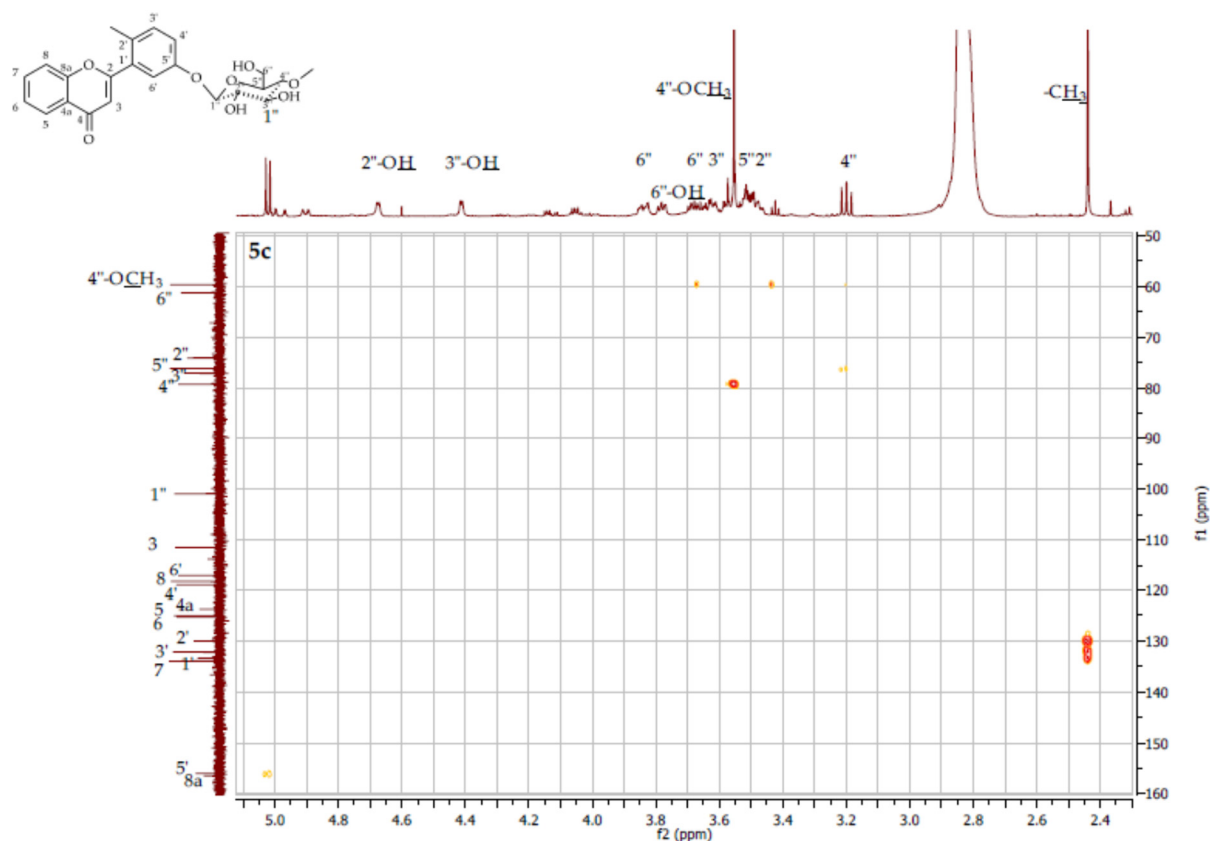

**Figure S167.** HMBC contour map –  $^1\text{H} \times ^{13}\text{C}$  expansion of 2'-methylflavone 5'-O-β-D-(4''-O-methyl)-glucopyranoside (5c)
